# Supplementary material for: Copy number losses of oncogenes and gains of tumor suppressor genes generate common driver mutations
Source: Springer Nature journal article supplement (doi:10.1038/s41467-024-50552-1), 2024-07-20
Supplement: MOESM3 [file 41467_2024_50552_MOESM3_ESM.pdf]

## **Description of Additional supplementary files**

**Supplementary Data S1:** Selection estimates across copy number states

**Supplementary Data S2:** Selection estimates in diploid state

**Supplementary Data S3:** Selection change associated with the deletion of the gene.

**Supplementary Data S4:** Selection change associated with the gain of the gene.

**Supplementary Data S5:** Clusters of gene-tumor type pairs

**Supplementary Data S6:** Cancer types with largest amount of data
