# Supplementary material for: Copy number losses of oncogenes and gains of tumor suppressor genes generate common driver mutations
Source: Nat Commun. 2024 Jul 20;15:6139. doi: 10.1038/s41467-024-50552-1 (PMC11271286; doi:10.1038/s41467-024-50552-1)
Supplement: Supplementary file 11 — Source Data [file 41467_2024_50552_MOESM11_ESM.xlsx]

## Sheet: Fig.1b
HGNC	Cohort	Type	coef_corrected_log2	FDR	coefName
A1CF	BLCA	Cancer genes	3.88743e-10	1	isTarget1
A1CF	COREAD	Cancer genes	1.59761e-10	0.746916	isTarget1
A1CF	HNSC	Cancer genes	0.245516	0.709641	isTarget1
A1CF	LUAD	Cancer genes	-1.10443	0.0945666	isTarget1
ABCC3	BLCA	Random genes	-0.626094	0.247624	isTarget1
ABCC3	COREAD	Random genes	-0.161723	0.553275	isTarget1
ABCC3	HNSC	Random genes	-1.27435	0.161534	isTarget1
ABCC3	LUAD	Random genes	-0.321945	0.51525	isTarget1
ABHD17A	BLCA	Random genes	-1.40989	0.309928	isTarget1
ABHD17A	COREAD	Random genes	-0.465455	0.538766	isTarget1
ABHD17A	HNSC	Random genes	-1.11569e-11	0.762561	isTarget1
ABHD17A	LUAD	Random genes	-0.470549	0.63904	isTarget1
ACADS	BLCA	Random genes	0.37727	0.409616	isTarget1
ACADS	COREAD	Random genes	1.08234	0.208112	isTarget1
ACADS	HNSC	Random genes	0.293101	0.800419	isTarget1
ACADS	LUAD	Random genes	-0.914996	0.281998	isTarget1
ACAP3	BLCA	Random genes	0.266013	0.535309	isTarget1
ACAP3	COREAD	Random genes	0.188837	0.651736	isTarget1
ACAP3	HNSC	Random genes	-0.207776	0.729051	isTarget1
ACAP3	LUAD	Random genes	0.28943	0.556321	isTarget1
ACLY	BLCA	Random genes	6.41807e-12	0.957024	isTarget1
ACLY	COREAD	Random genes	0.168452	0.785751	isTarget1
ACLY	HNSC	Random genes	-1.12265	0.206918	isTarget1
ACLY	LUAD	Random genes	-0.485704	0.375997	isTarget1
ACTR5	BLCA	Random genes	-0.565427	0.35503	isTarget1
ACTR5	COREAD	Random genes	0.569181	0.301538	isTarget1
ACTR5	HNSC	Random genes	0.46068	0.367326	isTarget1
ACTR5	LUAD	Random genes	-0.174641	0.909229	isTarget1
ACVR1	BLCA	Cancer genes	-0.605774	0.392734	isTarget1
ACVR1	LUAD	Cancer genes	-0.553124	0.489022	isTarget1
ACVR1B	BLCA	Cancer genes	0.261367	0.623302	isTarget1
ACVR1B	COREAD	Cancer genes	0.996246	0.138041	isTarget1
ACVR1B	HNSC	Cancer genes	1.32773	0.122048	isTarget1
ACVR1B	LUAD	Cancer genes	1.26737	0.028976	isTarget1
ACVR2A	BLCA	Cancer genes	-0.940502	0.304466	isTarget1
ACVR2A	COREAD	Cancer genes	1.31627	0.0740906	isTarget1
ACVR2A	HNSC	Cancer genes	-2.18268	0.204352	isTarget1
ACVR2A	LUAD	Cancer genes	-0.418645	0.424617	isTarget1
ADH1B	BLCA	Random genes	6.40685e-16	0.881021	isTarget1
ADH1B	LUAD	Random genes	1.92206e-15	0.746916	isTarget1
AJUBA	BLCA	Cancer genes	0.758633	0.252589	isTarget1
AJUBA	COREAD	Cancer genes	-3.58031	0.0831188	isTarget1
AJUBA	HNSC	Cancer genes	2.14115	0	isTarget1
AJUBA	LUAD	Cancer genes	-1.28669	0.110851	isTarget1
AK8	BLCA	Random genes	0.258972	0.757208	isTarget1
AK8	COREAD	Random genes	0.380101	0.537343	isTarget1
AK8	HNSC	Random genes	-0.895536	0.36059	isTarget1
AK8	LUAD	Random genes	-1.27325e-11	0.881021	isTarget1
AKAP14	BLCA	Random genes	3.20343e-16	0.626724	isTarget1
AKAP14	COREAD	Random genes	-0.775211	0.550425	isTarget1
AKAP14	HNSC	Random genes	2.29834	0.143352	isTarget1
AKAP14	LUAD	Random genes	-2.14423e-11	0.798632	isTarget1
AKR1E2	BLCA	Random genes	0.304223	0.658628	isTarget1
AKR1E2	HNSC	Random genes	-0.446356	0.605506	isTarget1
AKR1E2	LUAD	Random genes	-0.308591	0.764286	isTarget1
AKT1	BLCA	Cancer genes	-1.67118e-11	0.732419	isTarget1
AKT1	COREAD	Cancer genes	9.09132e-13	0.810116	isTarget1
AKT1	HNSC	Cancer genes	2.43454e-10	0.754465	isTarget1
AKT1	LUAD	Cancer genes	-4.7938e-11	0.746916	isTarget1
AKT2	BLCA	Cancer genes	-0.435591	0.545941	isTarget1
AKT2	COREAD	Cancer genes	-0.860395	0.324326	isTarget1
AKT2	HNSC	Cancer genes	0.29508	0.649315	isTarget1
AKT2	LUAD	Cancer genes	1.07537	0.0732625	isTarget1
AKT3	BLCA	Cancer genes	0.451707	0.633369	isTarget1
AKT3	COREAD	Cancer genes	0.6294	0.268081	isTarget1
AKT3	HNSC	Cancer genes	0.207634	0.909229	isTarget1
AKT3	LUAD	Cancer genes	0.653108	0.301267	isTarget1
ALDH1L1	BLCA	Random genes	-0.62706	0.33314	isTarget1
ALDH1L1	COREAD	Random genes	0.165478	0.720513	isTarget1
ALDH1L1	HNSC	Random genes	1.01728	0.133617	isTarget1
ALDH1L1	LUAD	Random genes	0.914176	0.0983743	isTarget1
ALKBH2	BLCA	Random genes	-1.38055	0.329402	isTarget1
ALKBH2	COREAD	Random genes	-1.33191	0.380822	isTarget1
ALKBH2	HNSC	Random genes	0.981198	0.380631	isTarget1
ALKBH2	LUAD	Random genes	-0.834607	0.385162	isTarget1
AMER1	BLCA	Cancer genes	1.10904	0.249464	isTarget1
AMER1	COREAD	Cancer genes	2.93295	4.36183e-05	isTarget1
AMER1	HNSC	Cancer genes	1.92715e-11	0.754465	isTarget1
AMER1	LUAD	Cancer genes	0.974816	0.0900723	isTarget1
ANAPC1	BLCA	Cancer genes	-2.97278e-13	0.975974	isTarget1
ANAPC1	COREAD	Cancer genes	-0.344811	0.461389	isTarget1
ANAPC1	HNSC	Cancer genes	0.147982	0.812736	isTarget1
ANAPC1	LUAD	Cancer genes	-0.357034	0.432003	isTarget1
ANKAR	BLCA	Random genes	-4.11624e-12	0.785751	isTarget1
ANKAR	COREAD	Random genes	-0.572672	0.325285	isTarget1
ANKAR	HNSC	Random genes	-0.295529	0.509808	isTarget1
ANKAR	LUAD	Random genes	-0.292427	0.484865	isTarget1
ANKRD27	BLCA	Random genes	0.244091	0.640343	isTarget1
ANKRD27	COREAD	Random genes	0.219814	0.63635	isTarget1
ANKRD27	HNSC	Random genes	-0.615294	0.317827	isTarget1
ANKRD27	LUAD	Random genes	0.123753	0.872271	isTarget1
ANTXR1	BLCA	Random genes	-0.987976	0.308994	isTarget1
ANTXR1	COREAD	Random genes	1.12694	0.091782	isTarget1
ANTXR1	HNSC	Random genes	-1.01655	0.297718	isTarget1
ANTXR1	LUAD	Random genes	0.963748	0.0789322	isTarget1
ANXA11	BLCA	Random genes	6.31062e-11	0.740385	isTarget1
ANXA11	COREAD	Random genes	-0.28382	0.70233	isTarget1
ANXA11	HNSC	Random genes	-0.356879	0.698084	isTarget1
ANXA11	LUAD	Random genes	-0.40666	0.553275	isTarget1
ANXA6	BLCA	Random genes	0.379207	0.539393	isTarget1
ANXA6	COREAD	Random genes	-0.931804	0.299991	isTarget1
ANXA6	HNSC	Random genes	1.0714	0.110851	isTarget1
ANXA6	LUAD	Random genes	0.535152	0.314247	isTarget1
AP1G1	BLCA	Random genes	0.503885	0.389818	isTarget1
AP1G1	COREAD	Random genes	0.19306	0.828551	isTarget1
AP1G1	HNSC	Random genes	1.01008	0.0744355	isTarget1
AP1G1	LUAD	Random genes	0.221942	0.713498	isTarget1
APAF1	BLCA	Random genes	1.70135e-10	0.87014	isTarget1
APAF1	COREAD	Random genes	0.45882	0.634162	isTarget1
APAF1	HNSC	Random genes	0.311661	0.657117	isTarget1
APAF1	LUAD	Random genes	0.652509	0.375193	isTarget1
APC	BLCA	Cancer genes	0.134434	0.866715	isTarget1
APC	COREAD	Cancer genes	7.22012	0	isTarget1
APC	HNSC	Cancer genes	1.45815	0.103449	isTarget1
APC	LUAD	Cancer genes	3.35593	0.0177824	isTarget1
AR	BLCA	Cancer genes	0.392216	0.748773	isTarget1
AR	COREAD	Cancer genes	1.38122	0.071436	isTarget1
AR	HNSC	Cancer genes	0.349216	0.659935	isTarget1
AR	LUAD	Cancer genes	1.31213e-10	1	isTarget1
ARAF	BLCA	Cancer genes	-1.48264	0.221536	isTarget1
ARAF	COREAD	Cancer genes	0.634369	0.25001	isTarget1
ARAF	HNSC	Cancer genes	0.269695	0.518956	isTarget1
ARAF	LUAD	Cancer genes	-0.728572	0.244424	isTarget1
ARC	BLCA	Random genes	-2.42612e-10	0.866715	isTarget1
ARC	COREAD	Random genes	-0.123843	0.730955	isTarget1
ARC	HNSC	Random genes	-0.305182	0.722998	isTarget1
ARC	LUAD	Random genes	0.124302	0.688409	isTarget1
ARHGAP35	BLCA	Cancer genes	1.37107	0.00137857	isTarget1
ARHGAP35	COREAD	Cancer genes	1.03129	0.0900723	isTarget1
ARHGAP35	HNSC	Cancer genes	0.412274	0.35836	isTarget1
ARHGAP35	LUAD	Cancer genes	1.32077	0.0021018	isTarget1
ARHGEF10	BLCA	Cancer genes	-0.422699	0.757208	isTarget1
ARHGEF10	LUAD	Cancer genes	1.04186	0.348962	isTarget1
ARID1A	BLCA	Cancer genes	2.5901	0	isTarget1
ARID1A	COREAD	Cancer genes	1.79036	1.07269e-05	isTarget1
ARID1A	HNSC	Cancer genes	0.906824	0.0559393	isTarget1
ARID1A	LUAD	Cancer genes	1.0975	0.00223727	isTarget1
ARID1B	BLCA	Cancer genes	0.674887	0.388186	isTarget1
ARID1B	COREAD	Cancer genes	1.65629	0.24591	isTarget1
ARID1B	HNSC	Cancer genes	0.376468	0.59516	isTarget1
ARID1B	LUAD	Cancer genes	2.02143e-11	1	isTarget1
ARID2	BLCA	Cancer genes	1.29098e-13	0.939695	isTarget1
ARID2	COREAD	Cancer genes	3.79001e-11	0.936045	isTarget1
ARID2	HNSC	Cancer genes	0.416065	0.619608	isTarget1
ARID2	LUAD	Cancer genes	0.237091	0.581312	isTarget1
ARID5B	BLCA	Cancer genes	2.97598e-12	0.769426	isTarget1
ARID5B	COREAD	Cancer genes	-0.460327	0.64368	isTarget1
ARID5B	HNSC	Cancer genes	0.258088	0.542965	isTarget1
ARID5B	LUAD	Cancer genes	0.354483	0.504283	isTarget1
ARL5C	BLCA	Random genes	-0.801896	0.44781	isTarget1
ARL5C	COREAD	Random genes	1.05713e-13	0.909229	isTarget1
ARL5C	HNSC	Random genes	0.82191	0.70233	isTarget1
ARL5C	LUAD	Random genes	-2.68252e-11	0.722998	isTarget1
ARSE	COREAD	Random genes	-1.6617e-11	0.853143	isTarget1
ARSE	HNSC	Random genes	0.685258	0.498926	isTarget1
ARSE	LUAD	Random genes	5.95962e-11	0.87527	isTarget1
ASCC1	BLCA	Random genes	0.362182	0.757208	isTarget1
ASCC1	COREAD	Random genes	0.313654	0.53273	isTarget1
ASCC1	HNSC	Random genes	-2.30783e-10	0.73374	isTarget1
ASCC1	LUAD	Random genes	-0.649015	0.325213	isTarget1
ASXL1	BLCA	Cancer genes	0.496951	0.228307	isTarget1
ASXL1	COREAD	Cancer genes	0.446384	0.353861	isTarget1
ASXL1	HNSC	Cancer genes	0.262272	0.553275	isTarget1
ASXL1	LUAD	Cancer genes	0.253127	0.543682	isTarget1
ATAD1	BLCA	Random genes	-0.715796	0.425711	isTarget1
ATAD1	COREAD	Random genes	-0.813164	0.306488	isTarget1
ATAD1	HNSC	Random genes	-0.987617	0.317197	isTarget1
ATAD1	LUAD	Random genes	-1.25682	0.189088	isTarget1
ATF5	BLCA	Random genes	-1.39787	0.313504	isTarget1
ATF5	COREAD	Random genes	1.06767	0.202459	isTarget1
ATF5	HNSC	Random genes	-1.37747e-14	0.839104	isTarget1
ATF5	LUAD	Random genes	0.364929	0.654249	isTarget1
ATM	BLCA	Cancer genes	0.831217	0.0215961	isTarget1
ATM	COREAD	Cancer genes	1.72079	1.73255e-06	isTarget1
ATM	HNSC	Cancer genes	-0.102657	0.750678	isTarget1
ATM	LUAD	Cancer genes	0.795737	0.0219409	isTarget1
ATP6V1G2	BLCA	Random genes	0.493944	0.679535	isTarget1
ATP6V1G2	COREAD	Random genes	1.32881	0.189944	isTarget1
ATP6V1G2	HNSC	Random genes	-6.93157e-12	0.798632	isTarget1
ATP6V1G2	LUAD	Random genes	0.525911	0.590896	isTarget1
ATP7B	BLCA	Random genes	0.286838	0.551061	isTarget1
ATP7B	COREAD	Random genes	0.189347	0.735086	isTarget1
ATP7B	HNSC	Random genes	0.217529	0.644965	isTarget1
ATP7B	LUAD	Random genes	0.632411	0.224193	isTarget1
ATRX	BLCA	Cancer genes	0.23256	0.535309	isTarget1
ATRX	COREAD	Cancer genes	0.157179	0.602583	isTarget1
ATRX	HNSC	Cancer genes	0.325621	0.46327	isTarget1
ATRX	LUAD	Cancer genes	0.268639	0.47412	isTarget1
AXIN1	BLCA	Cancer genes	0.582934	0.421531	isTarget1
AXIN1	COREAD	Cancer genes	0.532438	0.343072	isTarget1
AXIN1	HNSC	Cancer genes	1.80913	0.000537385	isTarget1
AXIN1	LUAD	Cancer genes	0.422356	0.42419	isTarget1
B2M	BLCA	Cancer genes	0.971259	0.394482	isTarget1
B2M	COREAD	Cancer genes	0.645983	0.441915	isTarget1
B2M	HNSC	Cancer genes	2.11333	0.0288925	isTarget1
B2M	LUAD	Cancer genes	2.42139	8.40585e-05	isTarget1
BAP1	BLCA	Cancer genes	0.967968	0.380035	isTarget1
BAP1	COREAD	Cancer genes	1.83661	0.0558759	isTarget1
BAP1	HNSC	Cancer genes	0.701365	0.395043	isTarget1
BAP1	LUAD	Cancer genes	-0.772573	0.511091	isTarget1
BARD1	BLCA	Cancer genes	0.145524	0.679535	isTarget1
BARD1	COREAD	Cancer genes	-0.218519	0.743627	isTarget1
BARD1	HNSC	Cancer genes	-0.877837	0.306424	isTarget1
BARD1	LUAD	Cancer genes	0.661711	0.296483	isTarget1
BAX	BLCA	Cancer genes	-0.46435	0.517844	isTarget1
BAX	COREAD	Cancer genes	0.480729	0.743627	isTarget1
BAX	HNSC	Cancer genes	-0.797886	0.441201	isTarget1
BAX	LUAD	Cancer genes	1.00117	0.259518	isTarget1
BCKDHB	BLCA	Random genes	2.46792e-12	0.889169	isTarget1
BCKDHB	COREAD	Random genes	-0.285775	0.690986	isTarget1
BCKDHB	HNSC	Random genes	0.476565	0.448278	isTarget1
BCKDHB	LUAD	Random genes	0.689887	0.194656	isTarget1
BCL2	BLCA	Cancer genes	1.17854e-12	0.881021	isTarget1
BCL2	COREAD	Cancer genes	6.40685e-16	0.670901	isTarget1
BCL2	HNSC	Cancer genes	0.888529	0.623302	isTarget1
BCL2	LUAD	Cancer genes	1.17623	0.269732	isTarget1
BCLAF1	BLCA	Cancer genes	1.25076	0.0127335	isTarget1
BCLAF1	COREAD	Cancer genes	0.876988	0.151387	isTarget1
BCLAF1	HNSC	Cancer genes	1.61848	0.0108672	isTarget1
BCLAF1	LUAD	Cancer genes	1.75114	3.24702e-06	isTarget1
BCOR	BLCA	Cancer genes	4.68982e-13	1	isTarget1
BCOR	COREAD	Cancer genes	-1.38915e-11	0.878434	isTarget1
BCOR	HNSC	Cancer genes	-4.65865e-11	1	isTarget1
BCOR	LUAD	Cancer genes	0.986592	0.122513	isTarget1
BIRC6	BLCA	Cancer genes	0.343235	0.35659	isTarget1
BIRC6	COREAD	Cancer genes	0.390484	0.408901	isTarget1
BIRC6	HNSC	Cancer genes	-0.46334	0.281277	isTarget1
BIRC6	LUAD	Cancer genes	-0.28296	0.367326	isTarget1
BLM	BLCA	Cancer genes	0.837864	0.12313	isTarget1
BLM	COREAD	Cancer genes	0.210045	0.662132	isTarget1
BLM	HNSC	Cancer genes	-1.4171e-11	0.881021	isTarget1
BLM	LUAD	Cancer genes	0.653153	0.322729	isTarget1
BMI1	BLCA	Random genes	0.496379	0.37533	isTarget1
BMI1	COREAD	Random genes	-0.377236	0.552502	isTarget1
BMI1	HNSC	Random genes	-0.320814	0.769426	isTarget1
BMI1	LUAD	Random genes	0.181074	0.769426	isTarget1
BMX	BLCA	Random genes	0.488634	0.376334	isTarget1
BMX	COREAD	Random genes	0.519981	0.509099	isTarget1
BMX	HNSC	Random genes	0.978471	0.261578	isTarget1
BMX	LUAD	Random genes	-0.158331	0.633369	isTarget1
BRAF	BLCA	Cancer genes	1.68433	0.0125612	isTarget1
BRAF	COREAD	Cancer genes	5.34424	0	isTarget1
BRAF	HNSC	Cancer genes	2.6684	0.00110332	isTarget1
BRAF	LUAD	Cancer genes	4.02772	0	isTarget1
BRCA1	BLCA	Cancer genes	0.706108	0.221536	isTarget1
BRCA1	COREAD	Cancer genes	0.266331	0.581312	isTarget1
BRCA1	HNSC	Cancer genes	0.749894	0.283243	isTarget1
BRCA1	LUAD	Cancer genes	0.765511	0.259307	isTarget1
BRCA2	BLCA	Cancer genes	0.499511	0.263151	isTarget1
BRCA2	COREAD	Cancer genes	0.800132	0.199566	isTarget1
BRCA2	HNSC	Cancer genes	0.153285	0.714904	isTarget1
BRCA2	LUAD	Cancer genes	0.789831	0.176965	isTarget1
BRD7	BLCA	Cancer genes	1.08445	0.0626036	isTarget1
BRD7	COREAD	Cancer genes	0.205382	0.630095	isTarget1
BRD7	HNSC	Cancer genes	-0.958408	0.29263	isTarget1
BRD7	LUAD	Cancer genes	-0.413752	0.482837	isTarget1
BRD9	BLCA	Random genes	0	1	isTarget1
BRD9	COREAD	Random genes	3.20343e-16	1	isTarget1
BRD9	HNSC	Random genes	-6.40685e-16	1	isTarget1
BRD9	LUAD	Random genes	-8.00857e-16	1	isTarget1
BRIP1	BLCA	Cancer genes	0.698927	0.238638	isTarget1
BRIP1	COREAD	Cancer genes	0.466809	0.437354	isTarget1
BRIP1	HNSC	Cancer genes	1.2652	0.193403	isTarget1
BRIP1	LUAD	Cancer genes	0.397726	0.467429	isTarget1
BTBD2	BLCA	Random genes	1.20368	0.0971094	isTarget1
BTBD2	COREAD	Random genes	-1.00851e-10	0.957024	isTarget1
BTBD2	HNSC	Random genes	-2.29654e-12	1	isTarget1
BTBD2	LUAD	Random genes	-0.516586	0.506788	isTarget1
BTG2	BLCA	Cancer genes	0.994956	0.141711	isTarget1
BTG2	COREAD	Cancer genes	-4.27398	0.0785237	isTarget1
BTG2	HNSC	Cancer genes	-0.734028	0.489787	isTarget1
BTG2	LUAD	Cancer genes	-1.8826	0.129937	isTarget1
BUB1B	BLCA	Cancer genes	0.362906	0.452112	isTarget1
BUB1B	COREAD	Cancer genes	-0.678341	0.422501	isTarget1
BUB1B	HNSC	Cancer genes	3.78197e-12	0.949852	isTarget1
BUB1B	LUAD	Cancer genes	0.659835	0.295782	isTarget1
C14orf142	BLCA	Random genes	-0.781808	0.541052	isTarget1
C14orf142	COREAD	Random genes	-0.824129	0.432187	isTarget1
C14orf142	HNSC	Random genes	0.652871	0.45556	isTarget1
C14orf142	LUAD	Random genes	0.451577	0.425711	isTarget1
C17orf49	BLCA	Random genes	-0.807029	0.430785	isTarget1
C17orf49	COREAD	Random genes	0.492301	0.699148	isTarget1
C17orf49	HNSC	Random genes	-0.777724	0.504975	isTarget1
C17orf49	LUAD	Random genes	-0.470808	0.641348	isTarget1
C18orf42	BLCA	Random genes	-0.845481	0.404179	isTarget1
C18orf42	COREAD	Random genes	0.966875	0.432417	isTarget1
C18orf42	HNSC	Random genes	-1.38221	0.366123	isTarget1
C18orf42	LUAD	Random genes	-0.878765	0.330758	isTarget1
C19orf48	BLCA	Random genes	1.25304	0.450851	isTarget1
C19orf48	COREAD	Random genes	3.20343e-16	0.861659	isTarget1
C19orf48	HNSC	Random genes	6.40685e-16	0.878434	isTarget1
C19orf48	LUAD	Random genes	3.20343e-16	0.750678	isTarget1
C19orf84	BLCA	Random genes	-0.817259	0.418545	isTarget1
C19orf84	COREAD	Random genes	0.864054	0.217722	isTarget1
C19orf84	HNSC	Random genes	5.58357e-13	0.861659	isTarget1
C19orf84	LUAD	Random genes	-0.232646	0.625444	isTarget1
C1QTNF8	BLCA	Random genes	5.63515e-12	0.915253	isTarget1
C1QTNF8	COREAD	Random genes	6.17941e-13	0.872271	isTarget1
C1QTNF8	HNSC	Random genes	-0.783584	0.543959	isTarget1
C1QTNF8	LUAD	Random genes	-0.360544	0.759134	isTarget1
C1orf159	BLCA	Random genes	1.20353e-11	0.785751	isTarget1
C1orf159	COREAD	Random genes	0.82503	0.70233	isTarget1
C1orf159	HNSC	Random genes	-5.3683e-12	0.79477	isTarget1
C1orf159	LUAD	Random genes	-0.784218	0.556321	isTarget1
C3	BLCA	Random genes	0.404644	0.345589	isTarget1
C3	COREAD	Random genes	-0.16983	0.619608	isTarget1
C3	HNSC	Random genes	-5.43093e-12	0.878434	isTarget1
C3	LUAD	Random genes	-0.835412	0.0631486	isTarget1
C3orf70	BLCA	Cancer genes	1.31787	0.0650876	isTarget1
C3orf70	LUAD	Cancer genes	1.37165	0.182064	isTarget1
C5orf48	BLCA	Random genes	-3.37028e-11	0.720513	isTarget1
C5orf48	COREAD	Random genes	3.81464e-12	0.798632	isTarget1
C5orf48	HNSC	Random genes	1.96267e-10	1	isTarget1
C5orf48	LUAD	Random genes	-0.491323	0.402657	isTarget1
C9orf116	BLCA	Random genes	1.34928e-12	1	isTarget1
C9orf116	COREAD	Random genes	-4.80514e-16	1	isTarget1
C9orf116	HNSC	Random genes	9.93062e-14	0.939695	isTarget1
C9orf116	LUAD	Random genes	-0.474399	0.545941	isTarget1
CACNA1D	BLCA	Cancer genes	0.213455	0.528291	isTarget1
CACNA1D	COREAD	Cancer genes	0.121265	0.664214	isTarget1
CACNA1D	HNSC	Cancer genes	0.741469	0.213628	isTarget1
CACNA1D	LUAD	Cancer genes	0.732282	0.188906	isTarget1
CACNG4	BLCA	Random genes	1.24995	0.129937	isTarget1
CACNG4	COREAD	Random genes	-1.02043	0.308503	isTarget1
CACNG4	HNSC	Random genes	0.513783	0.428158	isTarget1
CACNG4	LUAD	Random genes	0.154264	0.597186	isTarget1
CALB1	COREAD	Random genes	0.380566	0.668675	isTarget1
CALB1	LUAD	Random genes	-0.575411	0.308994	isTarget1
CAMP	BLCA	Random genes	-0.466949	0.560491	isTarget1
CAMP	COREAD	Random genes	0.551694	0.550425	isTarget1
CAMP	HNSC	Random genes	-6.40685e-16	0.624387	isTarget1
CAMP	LUAD	Random genes	0.356842	0.743627	isTarget1
CAMTA1	HNSC	Cancer genes	-9.61028e-16	0.712259	isTarget1
CAMTA1	LUAD	Cancer genes	0	0.740385	isTarget1
CAPN14	BLCA	Random genes	-0.804788	0.457378	isTarget1
CAPN14	COREAD	Random genes	1.09286	0.320763	isTarget1
CAPN14	HNSC	Random genes	-0.787736	0.529743	isTarget1
CAPN14	LUAD	Random genes	-0.849033	0.389399	isTarget1
CARD11	BLCA	Cancer genes	0.756599	0.220189	isTarget1
CARD11	COREAD	Cancer genes	0.113191	0.604532	isTarget1
CARD11	HNSC	Cancer genes	0.692565	0.237764	isTarget1
CARD11	LUAD	Cancer genes	0.557415	0.163708	isTarget1
CARD14	BLCA	Random genes	-0.285344	0.542245	isTarget1
CARD14	COREAD	Random genes	-0.152092	0.80742	isTarget1
CARD14	HNSC	Random genes	-1.56024	0.130353	isTarget1
CARD14	LUAD	Random genes	-0.241614	0.543682	isTarget1
CARS	BLCA	Cancer genes	0.26165	0.614556	isTarget1
CARS	COREAD	Cancer genes	-0.555836	0.454826	isTarget1
CARS	HNSC	Cancer genes	-2.42038e-10	0.881021	isTarget1
CARS	LUAD	Cancer genes	-0.65817	0.294446	isTarget1
CASKIN1	BLCA	Random genes	0.300333	0.626724	isTarget1
CASKIN1	COREAD	Random genes	-0.89795	0.278893	isTarget1
CASKIN1	HNSC	Random genes	1.46717e-12	0.79477	isTarget1
CASKIN1	LUAD	Random genes	-1.27303e-10	1	isTarget1
CASP3	BLCA	Cancer genes	-7.44941e-12	0.800419	isTarget1
CASP3	COREAD	Cancer genes	2.53743e-12	0.826591	isTarget1
CASP3	HNSC	Cancer genes	0.502708	0.822135	isTarget1
CASP3	LUAD	Cancer genes	0.573579	0.557831	isTarget1
CASP8	BLCA	Cancer genes	1.82365	0.000520664	isTarget1
CASP8	COREAD	Cancer genes	1.70668	0.0164658	isTarget1
CASP8	HNSC	Cancer genes	4.83197	0	isTarget1
CASP8	LUAD	Cancer genes	0.988035	0.134863	isTarget1
CASP9	BLCA	Cancer genes	0.38471	0.599008	isTarget1
CASP9	COREAD	Cancer genes	6.40685e-16	0.949852	isTarget1
CASP9	HNSC	Cancer genes	1.38644e-12	0.883318	isTarget1
CASP9	LUAD	Cancer genes	1.10086	0.20633	isTarget1
CBFB	BLCA	Cancer genes	0.370795	0.625444	isTarget1
CBFB	COREAD	Cancer genes	-2.21808e-11	0.722998	isTarget1
CBFB	HNSC	Cancer genes	-1.32132	0.382294	isTarget1
CBFB	LUAD	Cancer genes	-0.469953	0.65045	isTarget1
CCDC106	BLCA	Random genes	1.03533	0.254026	isTarget1
CCDC106	COREAD	Random genes	0.48293	0.393743	isTarget1
CCDC106	HNSC	Random genes	7.40469e-11	0.946615	isTarget1
CCDC106	LUAD	Random genes	0.250119	0.581312	isTarget1
CCDC59	BLCA	Random genes	-0.494909	0.564369	isTarget1
CCDC59	COREAD	Random genes	8.29242e-11	0.822135	isTarget1
CCDC59	HNSC	Random genes	-2.07546	0.239813	isTarget1
CCDC59	LUAD	Random genes	1.05009e-10	0.906051	isTarget1
CCDC86	BLCA	Random genes	0.735917	0.381789	isTarget1
CCDC86	COREAD	Random genes	6.40685e-16	0.732419	isTarget1
CCDC86	HNSC	Random genes	3.20343e-16	0.667313	isTarget1
CCDC86	LUAD	Random genes	1.45078	0.190057	isTarget1
CCHCR1	BLCA	Random genes	0.720854	0.259276	isTarget1
CCHCR1	COREAD	Random genes	-0.923674	0.266236	isTarget1
CCHCR1	HNSC	Random genes	0.477817	0.471905	isTarget1
CCHCR1	LUAD	Random genes	0.14986	0.696622	isTarget1
CCNB1IP1	BLCA	Cancer genes	-0.488526	0.557831	isTarget1
CCNB1IP1	COREAD	Cancer genes	1.13658	0.242085	isTarget1
CCNB1IP1	HNSC	Cancer genes	2.1885	0.0106277	isTarget1
CCNB1IP1	LUAD	Cancer genes	1.50154	0.0470651	isTarget1
CCND1	BLCA	Cancer genes	0.601351	0.332569	isTarget1
CCND1	COREAD	Cancer genes	-2.81946e-11	0.946615	isTarget1
CCND1	HNSC	Cancer genes	0.484962	0.399214	isTarget1
CCND1	LUAD	Cancer genes	-0.768946	0.339805	isTarget1
CCND3	BLCA	Cancer genes	0.948251	0.197178	isTarget1
CCND3	COREAD	Cancer genes	-0.882467	0.35503	isTarget1
CCND3	HNSC	Cancer genes	-0.852635	0.40113	isTarget1
CCND3	LUAD	Cancer genes	-0.356695	0.545941	isTarget1
CCR4	BLCA	Cancer genes	2.82299e-11	0.886233	isTarget1
CCR4	COREAD	Cancer genes	0.339665	0.570966	isTarget1
CCR4	HNSC	Cancer genes	0.996665	0.271263	isTarget1
CCR4	LUAD	Cancer genes	1.27811e-10	0.918662	isTarget1
CCR7	BLCA	Cancer genes	-0.278591	0.630095	isTarget1
CCR7	COREAD	Cancer genes	0.289481	0.705011	isTarget1
CCR7	HNSC	Cancer genes	-0.475514	0.468137	isTarget1
CCR7	LUAD	Cancer genes	-1.17883	0.254801	isTarget1
CD274	BLCA	Cancer genes	0.920576	0.44781	isTarget1
CD274	COREAD	Cancer genes	2.23855e-12	0.846471	isTarget1
CD274	HNSC	Cancer genes	1.69118e-11	0.73374	isTarget1
CD274	LUAD	Cancer genes	-1.39198	0.323037	isTarget1
CD28	BLCA	Cancer genes	0.570108	0.404179	isTarget1
CD28	COREAD	Cancer genes	0.794397	0.46955	isTarget1
CD28	HNSC	Cancer genes	-0.518566	0.618846	isTarget1
CD28	LUAD	Cancer genes	0.562096	0.416613	isTarget1
CD34	BLCA	Random genes	-0.964641	0.273485	isTarget1
CD34	COREAD	Random genes	-0.690861	0.414535	isTarget1
CD34	HNSC	Random genes	0.279475	0.615605	isTarget1
CD34	LUAD	Random genes	0.141136	0.68292	isTarget1
CD74	BLCA	Cancer genes	-0.819337	0.415702	isTarget1
CD74	COREAD	Cancer genes	0.530285	0.597908	isTarget1
CD74	HNSC	Cancer genes	0.533511	0.591851	isTarget1
CD74	LUAD	Cancer genes	-2.03423	0.20603	isTarget1
CD79A	BLCA	Cancer genes	0.354661	0.740385	isTarget1
CD79A	COREAD	Cancer genes	0.400807	0.514845	isTarget1
CD79A	HNSC	Cancer genes	-0.822662	0.405793	isTarget1
CD79A	LUAD	Cancer genes	-5.7966e-13	0.748773	isTarget1
CD79B	BLCA	Cancer genes	-0.477223	0.554507	isTarget1
CD79B	COREAD	Cancer genes	0.716956	0.438924	isTarget1
CD79B	HNSC	Cancer genes	-1.52521	0.268081	isTarget1
CD79B	LUAD	Cancer genes	0.400322	0.591851	isTarget1
CD80	BLCA	Random genes	-0.283767	0.624387	isTarget1
CD80	COREAD	Random genes	0.300558	0.642611	isTarget1
CD80	HNSC	Random genes	0.250214	0.655392	isTarget1
CD80	LUAD	Random genes	3.48613e-11	0.77113	isTarget1
CD96	BLCA	Random genes	-0.482977	0.632533	isTarget1
CD96	COREAD	Random genes	1.18078e-12	0.79669	isTarget1
CD96	HNSC	Random genes	-0.847042	0.39974	isTarget1
CD96	LUAD	Random genes	-1.43279	0.3148	isTarget1
CDC23	BLCA	Random genes	-2.0301	0.103449	isTarget1
CDC23	COREAD	Random genes	-0.532683	0.400094	isTarget1
CDC23	HNSC	Random genes	0.567167	0.537959	isTarget1
CDC23	LUAD	Random genes	-0.637262	0.374571	isTarget1
CDC73	LUAD	Cancer genes	0.308825	0.529173	isTarget1
CDH10	BLCA	Cancer genes	0.434997	0.367744	isTarget1
CDH10	COREAD	Cancer genes	0.153889	0.59516	isTarget1
CDH10	HNSC	Cancer genes	0.387535	0.263552	isTarget1
CDH10	LUAD	Cancer genes	0.450587	0.0527559	isTarget1
CDH11	BLCA	Cancer genes	0.684511	0.188906	isTarget1
CDH11	COREAD	Cancer genes	1.49001e-09	1	isTarget1
CDH11	HNSC	Cancer genes	0.578166	0.236202	isTarget1
CDH11	LUAD	Cancer genes	-0.477248	0.237454	isTarget1
CDH13	BLCA	Random genes	1.10863	0.240415	isTarget1
CDH13	COREAD	Random genes	0.785297	0.275566	isTarget1
CDH13	HNSC	Random genes	-0.60956	0.393146	isTarget1
CDH13	LUAD	Random genes	0.45368	0.408147	isTarget1
CDH17	BLCA	Cancer genes	0.907928	0.0814782	isTarget1
CDH17	COREAD	Cancer genes	0.780589	0.210681	isTarget1
CDH17	HNSC	Cancer genes	-0.567914	0.417436	isTarget1
CDH17	LUAD	Cancer genes	0.963262	0.0423378	isTarget1
CDHR5	BLCA	Random genes	0.727298	0.188224	isTarget1
CDHR5	COREAD	Random genes	0.344679	0.471363	isTarget1
CDHR5	HNSC	Random genes	-0.2568	0.578877	isTarget1
CDHR5	LUAD	Random genes	-0.14308	0.655392	isTarget1
CDK12	BLCA	Cancer genes	-0.53852	0.170074	isTarget1
CDK12	COREAD	Cancer genes	-0.751609	0.212856	isTarget1
CDK12	HNSC	Cancer genes	-0.531882	0.37678	isTarget1
CDK12	LUAD	Cancer genes	0.289996	0.433301	isTarget1
CDK4	BLCA	Cancer genes	0.291034	0.709641	isTarget1
CDK4	COREAD	Cancer genes	0.31063	0.550425	isTarget1
CDK4	HNSC	Cancer genes	1.02127	0.275237	isTarget1
CDK4	LUAD	Cancer genes	0.207694	0.711047	isTarget1
CDKN1A	BLCA	Cancer genes	3.81949	0	isTarget1
CDKN1A	COREAD	Cancer genes	0.518478	0.684631	isTarget1
CDKN1A	HNSC	Cancer genes	-0.796084	0.553275	isTarget1
CDKN1A	LUAD	Cancer genes	0.722916	0.449374	isTarget1
CDKN1B	BLCA	Cancer genes	1.4335	0.0360044	isTarget1
CDKN1B	COREAD	Cancer genes	-0.859639	0.418545	isTarget1
CDKN1B	HNSC	Cancer genes	-0.363175	0.633369	isTarget1
CDKN1B	LUAD	Cancer genes	1.34772	0.144086	isTarget1
CDKN2A	BLCA	Cancer genes	3.05956	0.000231056	isTarget1
CDKN2A	COREAD	Cancer genes	-0.523641	0.712259	isTarget1
CDKN2A	HNSC	Cancer genes	5.14379	0	isTarget1
CDKN2A	LUAD	Cancer genes	4.28374	0	isTarget1
CDKN2C	BLCA	Cancer genes	0.557403	0.668675	isTarget1
CDKN2C	LUAD	Cancer genes	-1.52954	0.310811	isTarget1
CEBPA	BLCA	Cancer genes	0.648603	0.396449	isTarget1
CEBPA	COREAD	Cancer genes	-2.13027	0.114171	isTarget1
CEBPA	HNSC	Cancer genes	-2.77029	0.153391	isTarget1
CEBPA	LUAD	Cancer genes	-2.16223	0.122189	isTarget1
CES1	BLCA	Random genes	-1.08158	0.144235	isTarget1
CES1	COREAD	Random genes	-0.741089	0.189698	isTarget1
CES1	HNSC	Random genes	-0.54766	0.339239	isTarget1
CES1	LUAD	Random genes	-1.45279	0.00760953	isTarget1
CHD2	BLCA	Cancer genes	1.39464	0.351591	isTarget1
CHD2	COREAD	Cancer genes	0.52331	0.618846	isTarget1
CHD2	HNSC	Cancer genes	-1.07611	0.383176	isTarget1
CHD2	LUAD	Cancer genes	0.835767	0.423749	isTarget1
CHD4	BLCA	Cancer genes	0.984644	0.0121575	isTarget1
CHD4	COREAD	Cancer genes	0.639642	0.150349	isTarget1
CHD4	HNSC	Cancer genes	-0.120387	0.623302	isTarget1
CHD4	LUAD	Cancer genes	0.654351	0.126489	isTarget1
CHEK2	BLCA	Cancer genes	0.827426	0.293334	isTarget1
CHEK2	COREAD	Cancer genes	-0.506937	0.542245	isTarget1
CHEK2	HNSC	Cancer genes	0.433926	0.589731	isTarget1
CHEK2	LUAD	Cancer genes	1.76398	0.190057	isTarget1
CHST15	BLCA	Random genes	0.803526	0.42649	isTarget1
CHST15	COREAD	Random genes	1.24061	0.192015	isTarget1
CHST15	LUAD	Random genes	0.292789	0.915253	isTarget1
CIB3	BLCA	Random genes	1.912	0.0629273	isTarget1
CIB3	COREAD	Random genes	-0.787665	0.481254	isTarget1
CIB3	HNSC	Random genes	-0.788585	0.588611	isTarget1
CIB3	LUAD	Random genes	0.405147	0.521627	isTarget1
CIC	BLCA	Cancer genes	0.231505	0.500133	isTarget1
CIC	COREAD	Cancer genes	-0.893155	0.208112	isTarget1
CIC	HNSC	Cancer genes	0.121339	0.819878	isTarget1
CIC	LUAD	Cancer genes	-0.248322	0.461389	isTarget1
CIITA	BLCA	Cancer genes	0.180929	0.654249	isTarget1
CIITA	COREAD	Cancer genes	0.654945	0.197333	isTarget1
CIITA	HNSC	Cancer genes	1.265	0.0514935	isTarget1
CIITA	LUAD	Cancer genes	9.69293e-11	0.85106	isTarget1
CLIC4	BLCA	Random genes	-1.36357e-11	0.925049	isTarget1
CLIC4	COREAD	Random genes	-0.859675	0.421531	isTarget1
CLIC4	HNSC	Random genes	-0.503749	0.480627	isTarget1
CLIC4	LUAD	Random genes	-0.9042	0.340869	isTarget1
CLTC	BLCA	Cancer genes	0.0919718	0.743627	isTarget1
CLTC	COREAD	Cancer genes	-0.376567	0.481855	isTarget1
CLTC	HNSC	Cancer genes	-0.178294	0.579995	isTarget1
CLTC	LUAD	Cancer genes	-8.27013e-11	0.685544	isTarget1
CLTCL1	BLCA	Cancer genes	0.150591	0.662132	isTarget1
CLTCL1	COREAD	Cancer genes	0.983808	0.244555	isTarget1
CLTCL1	HNSC	Cancer genes	0.630739	0.39551	isTarget1
CLTCL1	LUAD	Cancer genes	1.55455	0.0351651	isTarget1
CMBL	BLCA	Random genes	-0.889434	0.37678	isTarget1
CMBL	COREAD	Random genes	-0.492153	0.625444	isTarget1
CMBL	HNSC	Random genes	-0.501639	0.669726	isTarget1
CMBL	LUAD	Random genes	-0.292055	0.581312	isTarget1
CNBP	BLCA	Cancer genes	5.00202e-11	0.909229	isTarget1
CNBP	COREAD	Cancer genes	-2.21036e-14	0.72483	isTarget1
CNBP	HNSC	Cancer genes	-0.836155	0.397007	isTarget1
CNBP	LUAD	Cancer genes	-0.467899	0.578877	isTarget1
CNDP1	BLCA	Random genes	2.19592e-11	0.846471	isTarget1
CNDP1	COREAD	Random genes	-2.55153e-13	0.785751	isTarget1
CNDP1	HNSC	Random genes	1.30207	0.0363555	isTarget1
CNDP1	LUAD	Random genes	0.31531	0.47464	isTarget1
CNDP2	BLCA	Random genes	0.391274	0.613773	isTarget1
CNDP2	COREAD	Random genes	-3.00463	0.162892	isTarget1
CNDP2	HNSC	Random genes	-2.13452	0.115383	isTarget1
CNDP2	LUAD	Random genes	0.37725	0.320173	isTarget1
CNOT3	BLCA	Cancer genes	0.555793	0.396449	isTarget1
CNOT3	COREAD	Cancer genes	0.523443	0.52351	isTarget1
CNOT3	HNSC	Cancer genes	-3.89508e-11	0.789843	isTarget1
CNOT3	LUAD	Cancer genes	0.301342	0.67354	isTarget1
CNOT7	BLCA	Random genes	-0.88157	0.40348	isTarget1
CNOT7	LUAD	Random genes	0.323651	0.68292	isTarget1
CNTN6	BLCA	Random genes	0.581709	0.341429	isTarget1
CNTN6	COREAD	Random genes	0.902997	0.0679457	isTarget1
CNTN6	HNSC	Random genes	0.459867	0.382439	isTarget1
CNTN6	LUAD	Random genes	0.446779	0.35659	isTarget1
CNTNAP2	BLCA	Cancer genes	-4.91109	0.0416489	isTarget1
CNTNAP2	COREAD	Cancer genes	-7.11766	0.0102678	isTarget1
CNTNAP2	HNSC	Cancer genes	-6.10961	0.0192269	isTarget1
CNTNAP2	LUAD	Cancer genes	-8.1086	0.00453118	isTarget1
COL17A1	BLCA	Random genes	1.28137e-15	0.672582	isTarget1
COL17A1	COREAD	Random genes	1.60171e-15	0.692592	isTarget1
COL17A1	HNSC	Random genes	-4.80514e-16	0.727851	isTarget1
COL17A1	LUAD	Random genes	3.93108e-11	0.839104	isTarget1
COL3A1	BLCA	Cancer genes	0.7045	0.460458	isTarget1
COL3A1	COREAD	Cancer genes	3.41389e-10	0.949852	isTarget1
COL3A1	HNSC	Cancer genes	-0.536142	0.495409	isTarget1
COL3A1	LUAD	Cancer genes	2.91341	0.0244641	isTarget1
CPEB3	BLCA	Cancer genes	3.30914e-12	1	isTarget1
CPEB3	COREAD	Cancer genes	-8.36902e-11	0.762561	isTarget1
CPEB3	HNSC	Cancer genes	0.293351	0.500133	isTarget1
CPEB3	LUAD	Cancer genes	-0.417943	0.561818	isTarget1
CPLX3	BLCA	Random genes	1.7795e-12	0.822135	isTarget1
CPLX3	COREAD	Random genes	-0.814161	0.425238	isTarget1
CPLX3	HNSC	Random genes	0.550449	0.557831	isTarget1
CPLX3	LUAD	Random genes	1.16051e-10	0.928578	isTarget1
CR1	BLCA	Cancer genes	-0.763996	0.162111	isTarget1
CR1	COREAD	Cancer genes	0.944772	0.121533	isTarget1
CR1	HNSC	Cancer genes	0.272076	0.617803	isTarget1
CR1	LUAD	Cancer genes	0.224165	0.620306	isTarget1
CRADD	BLCA	Random genes	4.18368e-13	0.881021	isTarget1
CRADD	COREAD	Random genes	-0.24463	0.667313	isTarget1
CRADD	HNSC	Random genes	0.846949	0.299991	isTarget1
CRADD	LUAD	Random genes	0.575393	0.489787	isTarget1
CREB3L1	BLCA	Cancer genes	-0.788603	0.58385	isTarget1
CREB3L1	COREAD	Cancer genes	9.45773e-11	0.833583	isTarget1
CREB3L1	HNSC	Cancer genes	-0.404311	0.626724	isTarget1
CREB3L1	LUAD	Cancer genes	-0.831224	0.404485	isTarget1
CREB3L2	BLCA	Cancer genes	-0.610359	0.47464	isTarget1
CREB3L2	COREAD	Cancer genes	7.52289e-10	0.810116	isTarget1
CREB3L2	HNSC	Cancer genes	-0.628362	0.611515	isTarget1
CREB3L2	LUAD	Cancer genes	1.1219e-11	0.77113	isTarget1
CREBBP	BLCA	Cancer genes	1.60071	0	isTarget1
CREBBP	COREAD	Cancer genes	0.243485	0.521627	isTarget1
CREBBP	HNSC	Cancer genes	1.55456	0.000174696	isTarget1
CREBBP	LUAD	Cancer genes	1.31386	0.000270055	isTarget1
CREBZF	LUAD	Random genes	0.543279	0.721814	isTarget1
CRTC1	BLCA	Cancer genes	-0.447279	0.57168	isTarget1
CRTC1	COREAD	Cancer genes	-0.904483	0.282781	isTarget1
CRTC1	HNSC	Cancer genes	-2.58311	0.151011	isTarget1
CRTC1	LUAD	Cancer genes	-1.13762	0.213375	isTarget1
CSMD3	BLCA	Cancer genes	0.264334	0.538766	isTarget1
CSMD3	COREAD	Cancer genes	1.21378	0.0541287	isTarget1
CSMD3	HNSC	Cancer genes	1.00879	0.0768753	isTarget1
CSMD3	LUAD	Cancer genes	2.13353	0	isTarget1
CTAG2	BLCA	Random genes	-9.45315e-12	0.78161	isTarget1
CTAG2	COREAD	Random genes	6.01924e-13	0.79669	isTarget1
CTAG2	HNSC	Random genes	-7.72218e-12	0.767364	isTarget1
CTAG2	LUAD	Random genes	-1.97097e-11	0.79669	isTarget1
CTCF	BLCA	Cancer genes	1.0885	0.0596204	isTarget1
CTCF	COREAD	Cancer genes	0.783388	0.393146	isTarget1
CTCF	HNSC	Cancer genes	1.96092	0.000124634	isTarget1
CTCF	LUAD	Cancer genes	0.509598	0.452814	isTarget1
CTNNA2	BLCA	Cancer genes	1.78606	0.0502083	isTarget1
CTNNA2	COREAD	Cancer genes	0.594911	0.240859	isTarget1
CTNNA2	HNSC	Cancer genes	1.06238	0.09759	isTarget1
CTNNA2	LUAD	Cancer genes	1.82385	0.000183913	isTarget1
CTNNB1	BLCA	Cancer genes	0.820153	0.213081	isTarget1
CTNNB1	COREAD	Cancer genes	1.72042	0.00507126	isTarget1
CTNNB1	HNSC	Cancer genes	1.08415	0.300625	isTarget1
CTNNB1	LUAD	Cancer genes	1.70485	0.00239227	isTarget1
CTNND1	BLCA	Cancer genes	-0.34992	0.583001	isTarget1
CTNND1	COREAD	Cancer genes	-0.350287	0.609844	isTarget1
CTNND1	HNSC	Cancer genes	-2.99381e-11	0.824042	isTarget1
CTNND1	LUAD	Cancer genes	1.00075	0.260015	isTarget1
CTNND2	BLCA	Cancer genes	-0.523105	0.287493	isTarget1
CTNND2	COREAD	Cancer genes	-0.323625	0.386951	isTarget1
CTNND2	HNSC	Cancer genes	0.847102	0.0664997	isTarget1
CTNND2	LUAD	Cancer genes	0.338957	0.249792	isTarget1
CTSV	LUAD	Random genes	0.330641	0.757208	isTarget1
CUL3	BLCA	Cancer genes	0.700698	0.28563	isTarget1
CUL3	COREAD	Cancer genes	0.184327	0.802512	isTarget1
CUL3	HNSC	Cancer genes	2.48519	0.000280085	isTarget1
CUL3	LUAD	Cancer genes	-1.19758e-11	0.752246	isTarget1
CUX1	LUAD	Cancer genes	1.06009	0.325285	isTarget1
CXCR4	BLCA	Cancer genes	1.07379e-12	0.881021	isTarget1
CXCR4	COREAD	Cancer genes	-1.40648	0.343072	isTarget1
CXCR4	HNSC	Cancer genes	-0.485291	0.519705	isTarget1
CXCR4	LUAD	Cancer genes	0.188476	0.776857	isTarget1
CXorf58	COREAD	Random genes	0.89562	0.295782	isTarget1
CXorf58	HNSC	Random genes	0.912628	0.369861	isTarget1
CXorf58	LUAD	Random genes	-0.390496	0.705011	isTarget1
CYBRD1	BLCA	Random genes	0.592537	0.47464	isTarget1
CYBRD1	COREAD	Random genes	-2.30414e-11	0.844237	isTarget1
CYBRD1	HNSC	Random genes	9.91044e-12	0.839104	isTarget1
CYBRD1	LUAD	Random genes	-0.360679	0.546665	isTarget1
CYLD	BLCA	Cancer genes	-0.54523	0.40348	isTarget1
CYLD	COREAD	Cancer genes	2.29123e-10	0.87014	isTarget1
CYLD	HNSC	Cancer genes	0.933663	0.182064	isTarget1
CYLD	LUAD	Cancer genes	1.02927	0.152967	isTarget1
CYP2S1	BLCA	Random genes	-0.444915	0.450177	isTarget1
CYP2S1	COREAD	Random genes	0.2191	0.693639	isTarget1
CYP2S1	HNSC	Random genes	-0.651602	0.453499	isTarget1
CYP2S1	LUAD	Random genes	-0.633714	0.346562	isTarget1
CYSLTR2	BLCA	Cancer genes	-0.628623	0.486597	isTarget1
CYSLTR2	COREAD	Cancer genes	1.05238	0.151166	isTarget1
CYSLTR2	HNSC	Cancer genes	0.574926	0.370789	isTarget1
CYSLTR2	LUAD	Cancer genes	0.838045	0.190268	isTarget1
DAW1	BLCA	Random genes	2.03462	0.115547	isTarget1
DAW1	HNSC	Random genes	-1.8793	0.149212	isTarget1
DAW1	LUAD	Random genes	-0.215351	0.672582	isTarget1
DCC	BLCA	Cancer genes	0.611369	0.346562	isTarget1
DCC	COREAD	Cancer genes	0.14837	0.67354	isTarget1
DCC	HNSC	Cancer genes	0.182417	0.672582	isTarget1
DCC	LUAD	Cancer genes	-0.393504	0.396898	isTarget1
DCST2	BLCA	Random genes	1.90294	0.332643	isTarget1
DCST2	COREAD	Random genes	-1.76188e-15	1	isTarget1
DCST2	HNSC	Random genes	-9.61028e-16	1	isTarget1
DCST2	LUAD	Random genes	2.2424e-15	0.936045	isTarget1
DCUN1D2	BLCA	Random genes	-0.795919	0.471905	isTarget1
DCUN1D2	COREAD	Random genes	2.0839e-10	0.881021	isTarget1
DCUN1D2	HNSC	Random genes	1.58725	0.369004	isTarget1
DCUN1D2	LUAD	Random genes	-0.788107	0.489787	isTarget1
DCUN1D3	BLCA	Random genes	0.407912	0.63904	isTarget1
DCUN1D3	COREAD	Random genes	1.59114e-12	0.949852	isTarget1
DCUN1D3	HNSC	Random genes	1.23537	0.311852	isTarget1
DCUN1D3	LUAD	Random genes	0.465993	0.487053	isTarget1
DDHD2	BLCA	Random genes	0.815206	0.182756	isTarget1
DDHD2	COREAD	Random genes	0.590535	0.411735	isTarget1
DDHD2	HNSC	Random genes	-3.03704e-11	0.883318	isTarget1
DDHD2	LUAD	Random genes	0.675952	0.386951	isTarget1
DDIT3	BLCA	Cancer genes	1.04148	0.223521	isTarget1
DDIT3	COREAD	Cancer genes	-3.90177e-13	0.928578	isTarget1
DDIT3	HNSC	Cancer genes	-0.778921	0.482837	isTarget1
DDIT3	LUAD	Cancer genes	1.81917e-10	0.946615	isTarget1
DDR2	BLCA	Cancer genes	0.178041	0.705011	isTarget1
DDR2	COREAD	Cancer genes	1.68638	0.0233478	isTarget1
DDR2	HNSC	Cancer genes	0.918378	0.201229	isTarget1
DDR2	LUAD	Cancer genes	0.937797	0.0268908	isTarget1
DDX10	BLCA	Cancer genes	-1.25831e-12	0.953729	isTarget1
DDX10	COREAD	Cancer genes	-0.397599	0.623302	isTarget1
DDX10	HNSC	Cancer genes	-0.781725	0.406123	isTarget1
DDX10	LUAD	Cancer genes	-0.263044	0.626724	isTarget1
DDX3X	BLCA	Cancer genes	1.53873e-10	0.757208	isTarget1
DDX3X	COREAD	Cancer genes	0.538169	0.618846	isTarget1
DDX3X	HNSC	Cancer genes	-3.20229e-11	1	isTarget1
DDX3X	LUAD	Cancer genes	-3.3829e-11	0.709641	isTarget1
DDX5	BLCA	Cancer genes	0.838271	0.671648	isTarget1
DDX5	COREAD	Cancer genes	9.61028e-16	0.655392	isTarget1
DDX5	HNSC	Cancer genes	-6.40685e-16	0.720513	isTarget1
DDX5	LUAD	Cancer genes	-0.789069	0.608716	isTarget1
DDX6	BLCA	Cancer genes	0.392809	0.543959	isTarget1
DDX6	COREAD	Cancer genes	0.361349	0.714904	isTarget1
DDX6	HNSC	Cancer genes	-1.45184e-11	0.828551	isTarget1
DDX6	LUAD	Cancer genes	-0.879245	0.302324	isTarget1
DENND4A	BLCA	Random genes	0.378878	0.381789	isTarget1
DENND4A	COREAD	Random genes	-0.129978	0.841491	isTarget1
DENND4A	HNSC	Random genes	-0.47999	0.357664	isTarget1
DENND4A	LUAD	Random genes	-0.73925	0.170074	isTarget1
DGAT2L6	BLCA	Random genes	1.39723	0.138879	isTarget1
DGAT2L6	COREAD	Random genes	-0.354472	0.59628	isTarget1
DGAT2L6	HNSC	Random genes	0.720441	0.449374	isTarget1
DGAT2L6	LUAD	Random genes	0.169606	0.65045	isTarget1
DGKQ	BLCA	Random genes	-0.397403	0.597908	isTarget1
DGKQ	COREAD	Random genes	-1.51589	0.201229	isTarget1
DGKQ	HNSC	Random genes	-0.214111	0.775016	isTarget1
DGKQ	LUAD	Random genes	-1.28987	0.147911	isTarget1
DHX32	BLCA	Random genes	0.492806	0.325507	isTarget1
DHX32	COREAD	Random genes	0.504014	0.375193	isTarget1
DHX32	HNSC	Random genes	3.46354e-12	1	isTarget1
DHX32	LUAD	Random genes	-0.202881	0.765568	isTarget1
DHX35	BLCA	Random genes	-0.309556	0.549346	isTarget1
DHX35	COREAD	Random genes	-0.640908	0.347903	isTarget1
DHX35	HNSC	Random genes	-0.735374	0.397007	isTarget1
DHX35	LUAD	Random genes	-0.527343	0.399214	isTarget1
DICER1	BLCA	Cancer genes	-0.391008	0.332643	isTarget1
DICER1	COREAD	Cancer genes	0.444099	0.525364	isTarget1
DICER1	HNSC	Cancer genes	-0.573675	0.221288	isTarget1
DICER1	LUAD	Cancer genes	0.289439	0.551061	isTarget1
DNAI2	BLCA	Random genes	0.314201	0.459055	isTarget1
DNAI2	COREAD	Random genes	0.22358	0.661142	isTarget1
DNAI2	HNSC	Random genes	0.588007	0.498926	isTarget1
DNAI2	LUAD	Random genes	0.994187	0.0228857	isTarget1
DNM2	BLCA	Cancer genes	0.336023	0.458813	isTarget1
DNM2	COREAD	Cancer genes	-3.29873e-12	0.902664	isTarget1
DNM2	HNSC	Cancer genes	0.554474	0.329402	isTarget1
DNM2	LUAD	Cancer genes	-0.972633	0.171866	isTarget1
DNMT3A	BLCA	Cancer genes	1.22165	0.276837	isTarget1
DNMT3A	COREAD	Cancer genes	0.319577	0.539393	isTarget1
DNMT3A	HNSC	Cancer genes	0.938206	0.209625	isTarget1
DNMT3A	LUAD	Cancer genes	1.95906	0.00257523	isTarget1
DPP9	BLCA	Random genes	-0.969113	0.276837	isTarget1
DPP9	COREAD	Random genes	0.162369	0.609844	isTarget1
DPP9	HNSC	Random genes	0.577653	0.318592	isTarget1
DPP9	LUAD	Random genes	0.309125	0.534674	isTarget1
DROSHA	BLCA	Cancer genes	-0.570372	0.487053	isTarget1
DROSHA	COREAD	Cancer genes	0.845032	0.358675	isTarget1
DROSHA	HNSC	Cancer genes	-4.45102e-11	0.925049	isTarget1
DROSHA	LUAD	Cancer genes	0.628794	0.309519	isTarget1
DTX1	BLCA	Cancer genes	-1.25518e-11	0.85106	isTarget1
DTX1	COREAD	Cancer genes	-0.526828	0.405053	isTarget1
DTX1	HNSC	Cancer genes	-0.712545	0.412398	isTarget1
DTX1	LUAD	Cancer genes	0.144285	0.705011	isTarget1
DUXA	COREAD	Random genes	0	0.712259	isTarget1
EAF2	BLCA	Random genes	0.83638	0.276671	isTarget1
EAF2	COREAD	Random genes	-1.4416	0.301873	isTarget1
EAF2	HNSC	Random genes	-9.87136e-12	0.953729	isTarget1
EAF2	LUAD	Random genes	0.234773	1	isTarget1
EBF1	BLCA	Cancer genes	-3.1124e-11	1	isTarget1
EBF1	COREAD	Cancer genes	1.04024	0.0766771	isTarget1
EBF1	HNSC	Cancer genes	2.24395	0.017309	isTarget1
EBF1	LUAD	Cancer genes	0.532342	0.255592	isTarget1
EGFL8	BLCA	Random genes	-0.841228	0.352071	isTarget1
EGFL8	COREAD	Random genes	-0.468701	0.498926	isTarget1
EGFL8	HNSC	Random genes	0.689259	0.445726	isTarget1
EGFL8	LUAD	Random genes	0.542218	0.489022	isTarget1
EGFR	BLCA	Cancer genes	4.47285e-11	1	isTarget1
EGFR	COREAD	Cancer genes	0.170448	0.836439	isTarget1
EGFR	HNSC	Cancer genes	0.903217	0.275922	isTarget1
EGFR	LUAD	Cancer genes	2.85331	0	isTarget1
EID1	BLCA	Random genes	-0.448077	0.654249	isTarget1
EID1	COREAD	Random genes	-1.61018	0.289053	isTarget1
EID1	HNSC	Random genes	-6.39628e-11	0.822135	isTarget1
EID1	LUAD	Random genes	0.487202	0.545941	isTarget1
EIF3E	COREAD	Cancer genes	0.70852	0.398738	isTarget1
EIF3E	HNSC	Cancer genes	-0.360637	0.616612	isTarget1
EIF3E	LUAD	Cancer genes	-0.27194	0.641348	isTarget1
EIF3M	BLCA	Random genes	-0.477773	0.584845	isTarget1
EIF3M	COREAD	Random genes	-0.817363	0.441915	isTarget1
EIF3M	HNSC	Random genes	0.506091	0.698084	isTarget1
EIF3M	LUAD	Random genes	-0.482233	0.470819	isTarget1
EIF5	BLCA	Random genes	1.10287	0.156501	isTarget1
EIF5	COREAD	Random genes	-1.16557e-10	0.74192	isTarget1
EIF5	HNSC	Random genes	0.709525	0.437354	isTarget1
EIF5	LUAD	Random genes	-0.472984	0.549346	isTarget1
ELF3	BLCA	Cancer genes	4.00866	0	isTarget1
ELF3	COREAD	Cancer genes	0.910369	0.297192	isTarget1
ELF3	HNSC	Cancer genes	-0.681637	0.489022	isTarget1
ELF3	LUAD	Cancer genes	0.391382	0.497961	isTarget1
ELK4	BLCA	Cancer genes	0.479596	0.559648	isTarget1
ELK4	COREAD	Cancer genes	-3.71328e-11	0.719105	isTarget1
ELK4	HNSC	Cancer genes	-0.290485	0.608716	isTarget1
ELK4	LUAD	Cancer genes	0.41043	0.59628	isTarget1
ELL	BLCA	Cancer genes	-2.85406	0.139525	isTarget1
ELL	COREAD	Cancer genes	0.59315	0.321074	isTarget1
ELL	HNSC	Cancer genes	-0.635017	0.407704	isTarget1
ELL	LUAD	Cancer genes	0.241315	0.740385	isTarget1
ENPP5	BLCA	Random genes	0.412568	0.470236	isTarget1
ENPP5	COREAD	Random genes	0.516039	0.529173	isTarget1
ENPP5	HNSC	Random genes	-0.694697	0.393146	isTarget1
ENPP5	LUAD	Random genes	0.523073	0.521627	isTarget1
EP300	BLCA	Cancer genes	1.73412	0	isTarget1
EP300	COREAD	Cancer genes	0.607807	0.245491	isTarget1
EP300	HNSC	Cancer genes	1.4583	6.33794e-05	isTarget1
EP300	LUAD	Cancer genes	0.625679	0.228307	isTarget1
EPC1	BLCA	Random genes	0.182685	0.67602	isTarget1
EPC1	COREAD	Random genes	-0.399205	0.450851	isTarget1
EPC1	HNSC	Random genes	-1.5065	0.214738	isTarget1
EPC1	LUAD	Random genes	-0.787336	0.244565	isTarget1
EPHA2	BLCA	Cancer genes	0.987444	0.0486392	isTarget1
EPHA2	COREAD	Cancer genes	0.635868	0.318592	isTarget1
EPHA2	HNSC	Cancer genes	1.89549	4.81997e-06	isTarget1
EPHA2	LUAD	Cancer genes	0.772173	0.0677953	isTarget1
EPHA7	BLCA	Cancer genes	0.745962	0.301003	isTarget1
EPHA7	COREAD	Cancer genes	-0.283286	0.458287	isTarget1
EPHA7	HNSC	Cancer genes	-4.51553e-10	0.949852	isTarget1
EPHA7	LUAD	Cancer genes	2.62072e-11	0.762561	isTarget1
ERBB2	BLCA	Cancer genes	2.48264	0	isTarget1
ERBB2	COREAD	Cancer genes	1.99712	0	isTarget1
ERBB2	HNSC	Cancer genes	0.709651	0.205817	isTarget1
ERBB2	LUAD	Cancer genes	0.344512	0.442586	isTarget1
ERBB3	BLCA	Cancer genes	1.64115	0.0039439	isTarget1
ERBB3	COREAD	Cancer genes	0.365234	0.674685	isTarget1
ERBB3	HNSC	Cancer genes	0.990713	0.288508	isTarget1
ERBB3	LUAD	Cancer genes	0.975683	0.262713	isTarget1
ERCC2	BLCA	Cancer genes	2.38217	0	isTarget1
ERCC2	COREAD	Cancer genes	1.84515e-10	1	isTarget1
ERCC2	HNSC	Cancer genes	0.412994	0.540185	isTarget1
ERCC2	LUAD	Cancer genes	0.325	0.572012	isTarget1
ERCC3	BLCA	Cancer genes	-0.21458	0.67354	isTarget1
ERCC3	COREAD	Cancer genes	-4.6038e-12	0.943432	isTarget1
ERCC3	HNSC	Cancer genes	0.594645	0.44781	isTarget1
ERCC3	LUAD	Cancer genes	-0.246113	0.732419	isTarget1
ERCC4	BLCA	Cancer genes	0.240197	0.622631	isTarget1
ERCC4	COREAD	Cancer genes	4.84262e-12	0.817636	isTarget1
ERCC4	HNSC	Cancer genes	-0.818859	0.29232	isTarget1
ERCC4	LUAD	Cancer genes	0.1325	0.642611	isTarget1
ERCC5	BLCA	Cancer genes	-0.594292	0.317827	isTarget1
ERCC5	COREAD	Cancer genes	-0.895582	0.21099	isTarget1
ERCC5	HNSC	Cancer genes	0.413694	0.551864	isTarget1
ERCC5	LUAD	Cancer genes	-5.0328e-10	1	isTarget1
ERLIN1	BLCA	Random genes	0.296546	0.700646	isTarget1
ERLIN1	COREAD	Random genes	0.375417	0.669726	isTarget1
ERLIN1	HNSC	Random genes	-0.850648	0.392734	isTarget1
ERLIN1	LUAD	Random genes	-9.36121e-12	0.738401	isTarget1
ERRFI1	BLCA	Cancer genes	-0.538352	0.408147	isTarget1
ERRFI1	COREAD	Cancer genes	-3.54603e-12	0.819878	isTarget1
ERRFI1	HNSC	Cancer genes	3.57592e-10	0.878434	isTarget1
ERRFI1	LUAD	Cancer genes	1.13248	0.150527	isTarget1
ESPNL	COREAD	Random genes	-0.46142	0.476046	isTarget1
ESPNL	LUAD	Random genes	-0.532879	0.492526	isTarget1
ESRRA	BLCA	Random genes	-0.278266	0.632533	isTarget1
ESRRA	COREAD	Random genes	0.605642	0.33813	isTarget1
ESRRA	HNSC	Random genes	1.00887	0.278464	isTarget1
ESRRA	LUAD	Random genes	-1.15393	0.297086	isTarget1
ESYT3	BLCA	Random genes	-0.16564	0.822135	isTarget1
ESYT3	COREAD	Random genes	-0.317957	0.603528	isTarget1
ESYT3	HNSC	Random genes	0.476033	0.459055	isTarget1
ESYT3	LUAD	Random genes	-0.128181	0.695004	isTarget1
ETS2	COREAD	Random genes	1.60466	0.297192	isTarget1
ETS2	HNSC	Random genes	1.9266	0.227176	isTarget1
ETV1	BLCA	Cancer genes	0.226432	0.58385	isTarget1
ETV1	COREAD	Cancer genes	-3.36783e-10	0.750678	isTarget1
ETV1	HNSC	Cancer genes	0.618423	0.423749	isTarget1
ETV1	LUAD	Cancer genes	-1.34444	0.093953	isTarget1
ETV4	BLCA	Cancer genes	0.539944	0.36355	isTarget1
ETV4	COREAD	Cancer genes	-1.3798e-10	0.949852	isTarget1
ETV4	HNSC	Cancer genes	-0.861092	0.454826	isTarget1
ETV4	LUAD	Cancer genes	-0.907856	0.32903	isTarget1
ETV5	BLCA	Cancer genes	0.204786	0.802512	isTarget1
ETV5	COREAD	Cancer genes	0.808767	0.255263	isTarget1
ETV5	HNSC	Cancer genes	-1.4759e-11	0.939695	isTarget1
ETV5	LUAD	Cancer genes	-0.49368	0.501662	isTarget1
EXT1	COREAD	Cancer genes	0	0.615605	isTarget1
EXT1	LUAD	Cancer genes	-0.804798	0.580686	isTarget1
EXT2	BLCA	Cancer genes	8.77941e-11	0.853143	isTarget1
EXT2	COREAD	Cancer genes	-3.28911	0.102939	isTarget1
EXT2	HNSC	Cancer genes	0.694537	0.290043	isTarget1
EXT2	LUAD	Cancer genes	0.127196	0.79477	isTarget1
EZH2	BLCA	Cancer genes	-0.813643	0.244074	isTarget1
EZH2	COREAD	Cancer genes	-0.683112	0.36355	isTarget1
EZH2	HNSC	Cancer genes	-0.259651	0.637515	isTarget1
EZH2	LUAD	Cancer genes	0.21315	0.798632	isTarget1
F2RL3	BLCA	Random genes	-1.88003	0.257898	isTarget1
F2RL3	COREAD	Random genes	2.91284e-11	0.953729	isTarget1
F2RL3	HNSC	Random genes	2.87908e-11	0.936045	isTarget1
F2RL3	LUAD	Random genes	0.361326	0.722998	isTarget1
FABP3	BLCA	Random genes	-0.781927	0.524488	isTarget1
FABP3	COREAD	Random genes	-0.779162	0.533692	isTarget1
FABP3	HNSC	Random genes	-7.07509e-12	0.881021	isTarget1
FABP3	LUAD	Random genes	0.508276	0.658628	isTarget1
FAM134A	HNSC	Random genes	-0.507183	0.530378	isTarget1
FAM134A	LUAD	Random genes	-2.62744	0.178026	isTarget1
FAM217B	BLCA	Random genes	-2.1801e-10	1	isTarget1
FAM217B	COREAD	Random genes	-0.185568	0.740385	isTarget1
FAM217B	HNSC	Random genes	-5.306e-11	0.776857	isTarget1
FAM217B	LUAD	Random genes	0.675429	0.248308	isTarget1
FAM69A	BLCA	Random genes	-0.662993	0.481855	isTarget1
FAM69A	COREAD	Random genes	0.746268	0.445347	isTarget1
FAM69A	HNSC	Random genes	-0.498437	0.621508	isTarget1
FAM69A	LUAD	Random genes	-0.669673	0.355721	isTarget1
FAM69C	BLCA	Random genes	0.662838	0.47412	isTarget1
FAM69C	COREAD	Random genes	1.48543e-12	0.767364	isTarget1
FAM69C	HNSC	Random genes	0.525936	0.637515	isTarget1
FAM69C	LUAD	Random genes	1.10928e-11	0.866715	isTarget1
FAM8A1	BLCA	Cancer genes	0.291273	0.746916	isTarget1
FAM8A1	COREAD	Cancer genes	-1.39416e-10	0.720513	isTarget1
FAM8A1	HNSC	Cancer genes	0.377439	0.555432	isTarget1
FAM8A1	LUAD	Cancer genes	-1.15527	0.271833	isTarget1
FANCC	BLCA	Cancer genes	0.702639	0.394766	isTarget1
FANCC	COREAD	Cancer genes	0.426191	0.543959	isTarget1
FANCC	LUAD	Cancer genes	-1.29222	0.213375	isTarget1
FANCD2	BLCA	Cancer genes	0.335336	0.470236	isTarget1
FANCD2	COREAD	Cancer genes	0.315476	0.51203	isTarget1
FANCD2	HNSC	Cancer genes	0.401339	0.450851	isTarget1
FANCD2	LUAD	Cancer genes	-0.521682	0.352538	isTarget1
FANCE	BLCA	Cancer genes	-0.239794	0.695004	isTarget1
FANCE	COREAD	Cancer genes	-0.646091	0.396171	isTarget1
FANCE	HNSC	Cancer genes	-1.54992	0.259307	isTarget1
FANCE	LUAD	Cancer genes	-0.732592	0.388186	isTarget1
FANCF	BLCA	Cancer genes	0.429655	0.542965	isTarget1
FANCF	LUAD	Cancer genes	-1.29278	0.260598	isTarget1
FANCG	BLCA	Cancer genes	-0.519684	0.462136	isTarget1
FANCG	COREAD	Cancer genes	-0.352656	0.611515	isTarget1
FANCG	HNSC	Cancer genes	0.550518	0.537959	isTarget1
FANCG	LUAD	Cancer genes	0.363706	0.471363	isTarget1
FANCM	BLCA	Random genes	-0.348824	0.458287	isTarget1
FANCM	COREAD	Random genes	-0.185435	0.689448	isTarget1
FANCM	HNSC	Random genes	2.92258e-11	0.928578	isTarget1
FANCM	LUAD	Random genes	0.665315	0.179164	isTarget1
FAS	BLCA	Cancer genes	-0.859708	0.404485	isTarget1
FAS	COREAD	Cancer genes	1.45774	0.117158	isTarget1
FAS	HNSC	Cancer genes	1.43735	0.130353	isTarget1
FAS	LUAD	Cancer genes	-7.4006e-11	0.743627	isTarget1
FAT1	BLCA	Cancer genes	0.457985	0.641348	isTarget1
FAT1	HNSC	Cancer genes	1.54962	0.144235	isTarget1
FAT1	LUAD	Cancer genes	-1.08336	0.254026	isTarget1
FAT4	COREAD	Cancer genes	1.34733e-11	1	isTarget1
FBLN2	BLCA	Cancer genes	-0.611076	0.360831	isTarget1
FBLN2	COREAD	Cancer genes	-1.4576	0.0366551	isTarget1
FBLN2	HNSC	Cancer genes	0.533116	0.417436	isTarget1
FBLN2	LUAD	Cancer genes	-0.356014	0.579995	isTarget1
FBXO11	BLCA	Cancer genes	0.354776	0.572012	isTarget1
FBXO11	COREAD	Cancer genes	0.851077	0.288508	isTarget1
FBXO11	HNSC	Cancer genes	-3.08062e-10	0.654249	isTarget1
FBXO11	LUAD	Cancer genes	-0.367931	0.450851	isTarget1
FBXO39	BLCA	Random genes	-3.82489e-12	0.932368	isTarget1
FBXO39	COREAD	Random genes	5.30302e-11	1	isTarget1
FBXO39	HNSC	Random genes	0.18719	0.85106	isTarget1
FBXO39	LUAD	Random genes	1.27774	0.0919196	isTarget1
FBXW7	BLCA	Cancer genes	2.77298	7.7646e-06	isTarget1
FBXW7	COREAD	Cancer genes	4.93879	0	isTarget1
FBXW7	HNSC	Cancer genes	2.22927	0.000805128	isTarget1
FBXW7	LUAD	Cancer genes	0.762021	0.262713	isTarget1
FCRL4	BLCA	Cancer genes	0.683437	0.396449	isTarget1
FCRL4	COREAD	Cancer genes	-0.950414	0.345925	isTarget1
FCRL4	HNSC	Cancer genes	1.91678	0.00438888	isTarget1
FCRL4	LUAD	Cancer genes	-0.458533	0.366123	isTarget1
FEN1	BLCA	Cancer genes	0.395724	0.735086	isTarget1
FEN1	COREAD	Cancer genes	-1.46833	0.335572	isTarget1
FEN1	HNSC	Cancer genes	4.3499e-11	1	isTarget1
FEN1	LUAD	Cancer genes	-0.504308	0.56707	isTarget1
FERMT2	BLCA	Random genes	-0.343202	0.518956	isTarget1
FERMT2	COREAD	Random genes	1.69104	0.019836	isTarget1
FERMT2	HNSC	Random genes	-0.578774	0.432187	isTarget1
FERMT2	LUAD	Random genes	0.319676	0.665891	isTarget1
FEV	BLCA	Cancer genes	-1.39514	0.324326	isTarget1
FEV	COREAD	Cancer genes	-1.41795	0.317511	isTarget1
FEV	HNSC	Cancer genes	-0.791001	0.476046	isTarget1
FEV	LUAD	Cancer genes	-3.54829e-11	0.77113	isTarget1
FGF9	BLCA	Random genes	0.790093	0.43572	isTarget1
FGF9	COREAD	Random genes	0.852646	0.430785	isTarget1
FGF9	HNSC	Random genes	0.518953	0.743627	isTarget1
FGF9	LUAD	Random genes	-1.68318e-11	0.839104	isTarget1
FGFR1	BLCA	Cancer genes	0.377248	0.555432	isTarget1
FGFR1	COREAD	Cancer genes	-0.219812	0.783717	isTarget1
FGFR1	HNSC	Cancer genes	-1.553	0.189088	isTarget1
FGFR1	LUAD	Cancer genes	0.523598	0.299991	isTarget1
FGFR2	BLCA	Cancer genes	0.590113	0.348962	isTarget1
FGFR2	COREAD	Cancer genes	1.59609	0.061323	isTarget1
FGFR2	HNSC	Cancer genes	-0.260991	0.713498	isTarget1
FGFR2	LUAD	Cancer genes	0.184176	0.635107	isTarget1
FGFR3	BLCA	Cancer genes	2.7344	0	isTarget1
FGFR3	COREAD	Cancer genes	-5.96537e-11	0.800419	isTarget1
FGFR3	HNSC	Cancer genes	1.8828	0.000183913	isTarget1
FGFR3	LUAD	Cancer genes	-0.356307	0.533692	isTarget1
FGFR4	BLCA	Cancer genes	-2.52571e-10	0.892618	isTarget1
FGFR4	COREAD	Cancer genes	-0.975893	0.214738	isTarget1
FGFR4	HNSC	Cancer genes	0.339355	0.490682	isTarget1
FGFR4	LUAD	Cancer genes	-4.35009e-12	1	isTarget1
FH	LUAD	Cancer genes	-0.250839	0.769426	isTarget1
FHIT	BLCA	Cancer genes	0.387679	0.534674	isTarget1
FHIT	COREAD	Cancer genes	-1.34056	0.1942	isTarget1
FHIT	HNSC	Cancer genes	-0.535212	0.574268	isTarget1
FHIT	LUAD	Cancer genes	8.23409e-12	1	isTarget1
FIP1L1	BLCA	Cancer genes	-0.646428	0.380035	isTarget1
FIP1L1	COREAD	Cancer genes	3.61103e-11	0.889169	isTarget1
FIP1L1	LUAD	Cancer genes	0.262438	0.746916	isTarget1
FLCN	BLCA	Cancer genes	-0.475362	0.421206	isTarget1
FLCN	COREAD	Cancer genes	1.47414	0.0937894	isTarget1
FLCN	HNSC	Cancer genes	-3.39932e-12	0.855857	isTarget1
FLCN	LUAD	Cancer genes	1.09575	0.116982	isTarget1
FLI1	BLCA	Cancer genes	-0.804226	0.5873	isTarget1
FLI1	COREAD	Cancer genes	0.415336	0.570966	isTarget1
FLI1	HNSC	Cancer genes	1.05634	0.370789	isTarget1
FLI1	LUAD	Cancer genes	0.410092	0.553275	isTarget1
FLT3	BLCA	Cancer genes	0.365241	0.52351	isTarget1
FLT3	COREAD	Cancer genes	0.124661	1	isTarget1
FLT3	HNSC	Cancer genes	-0.779843	0.313946	isTarget1
FLT3	LUAD	Cancer genes	0.829401	0.122048	isTarget1
FLT4	BLCA	Cancer genes	-0.297733	0.526236	isTarget1
FLT4	COREAD	Cancer genes	1.16446	0.0417029	isTarget1
FLT4	HNSC	Cancer genes	0.155875	0.713498	isTarget1
FLT4	LUAD	Cancer genes	-0.174938	0.87014	isTarget1
FOXA1	BLCA	Cancer genes	0.521698	0.500133	isTarget1
FOXA1	COREAD	Cancer genes	2.02043e-11	0.79669	isTarget1
FOXA1	HNSC	Cancer genes	-0.693974	0.560491	isTarget1
FOXA1	LUAD	Cancer genes	0.261884	0.416812	isTarget1
FOXR1	BLCA	Cancer genes	-1.21889	0.360831	isTarget1
FOXR1	COREAD	Cancer genes	1.48659	0.172118	isTarget1
FOXR1	HNSC	Cancer genes	3.38881e-11	0.779141	isTarget1
FOXR1	LUAD	Cancer genes	3.11053e-13	0.853143	isTarget1
FOXS1	BLCA	Random genes	1.6472e-12	1	isTarget1
FOXS1	COREAD	Random genes	1.07865	0.242242	isTarget1
FOXS1	HNSC	Random genes	-0.481854	0.63635	isTarget1
FOXS1	LUAD	Random genes	2.52946e-11	0.831321	isTarget1
FUBP1	BLCA	Cancer genes	0.373072	0.460458	isTarget1
FUBP1	COREAD	Cancer genes	0.826171	0.284923	isTarget1
FUBP1	HNSC	Cancer genes	-1.49968e-10	0.824042	isTarget1
FUBP1	LUAD	Cancer genes	-0.250079	0.647048	isTarget1
GABRG2	BLCA	Random genes	-0.199047	0.620306	isTarget1
GABRG2	COREAD	Random genes	0.143917	0.67354	isTarget1
GABRG2	HNSC	Random genes	-6.03722e-10	0.889169	isTarget1
GABRG2	LUAD	Random genes	0.143011	0.521627	isTarget1
GATA3	BLCA	Cancer genes	0.417257	0.597186	isTarget1
GATA3	COREAD	Cancer genes	-0.375105	0.418545	isTarget1
GATA3	HNSC	Cancer genes	1.26216	0.0945666	isTarget1
GATA3	LUAD	Cancer genes	-3.11669e-10	1	isTarget1
GGT1	BLCA	Random genes	-0.487662	0.67354	isTarget1
GGT1	COREAD	Random genes	-0.652914	0.401818	isTarget1
GGT1	HNSC	Random genes	0.397775	0.581312	isTarget1
GGT1	LUAD	Random genes	-1.46866	0.29232	isTarget1
GINS1	BLCA	Random genes	-0.477303	0.64368	isTarget1
GINS1	COREAD	Random genes	-1.59194e-12	0.815553	isTarget1
GINS1	HNSC	Random genes	2.05768e-10	0.836439	isTarget1
GINS1	LUAD	Random genes	-0.477886	0.45434	isTarget1
GLI1	BLCA	Cancer genes	0.161083	0.68292	isTarget1
GLI1	COREAD	Cancer genes	7.94953e-11	0.855857	isTarget1
GLI1	HNSC	Cancer genes	0.396887	0.558759	isTarget1
GLI1	LUAD	Cancer genes	0.381262	0.34519	isTarget1
GLIPR1L1	BLCA	Random genes	-0.528636	0.471363	isTarget1
GLIPR1L1	COREAD	Random genes	-2.45549e-10	0.79477	isTarget1
GLIPR1L1	HNSC	Random genes	0.415495	0.750678	isTarget1
GLIPR1L1	LUAD	Random genes	-0.319242	0.502579	isTarget1
GLRX3	BLCA	Random genes	-0.45438	0.432417	isTarget1
GLRX3	COREAD	Random genes	0.400034	0.621508	isTarget1
GLRX3	HNSC	Random genes	-0.877096	0.386951	isTarget1
GLRX3	LUAD	Random genes	0.247525	0.881021	isTarget1
GMPR2	BLCA	Random genes	0.310594	0.516911	isTarget1
GMPR2	COREAD	Random genes	-0.788103	0.464347	isTarget1
GMPR2	HNSC	Random genes	-3.1853e-11	0.735086	isTarget1
GMPR2	LUAD	Random genes	6.87615e-12	0.693639	isTarget1
GNA11	BLCA	Cancer genes	-0.248708	0.712259	isTarget1
GNA11	COREAD	Cancer genes	0.336704	0.517844	isTarget1
GNA11	HNSC	Cancer genes	0.382975	0.690986	isTarget1
GNA11	LUAD	Cancer genes	0.303658	0.736671	isTarget1
GNAQ	BLCA	Cancer genes	-2.17908e-11	0.932368	isTarget1
GNAQ	COREAD	Cancer genes	0.390372	0.578877	isTarget1
GNAQ	LUAD	Cancer genes	-0.344786	0.621508	isTarget1
GNAS	BLCA	Cancer genes	0.514283	0.473303	isTarget1
GNAS	COREAD	Cancer genes	1.08337	0.0835802	isTarget1
GNAS	HNSC	Cancer genes	0.992637	0.212739	isTarget1
GNAS	LUAD	Cancer genes	1.3198	0.027762	isTarget1
GNRHR	BLCA	Random genes	-3.48054e-11	0.909229	isTarget1
GNRHR	COREAD	Random genes	6.19671e-12	0.878434	isTarget1
GNRHR	HNSC	Random genes	-0.326774	0.802512	isTarget1
GNRHR	LUAD	Random genes	0.40577	0.423749	isTarget1
GPC5	BLCA	Cancer genes	0.599534	0.311447	isTarget1
GPC5	COREAD	Cancer genes	-0.568064	0.218533	isTarget1
GPC5	HNSC	Cancer genes	0.858287	0.287493	isTarget1
GPC5	LUAD	Cancer genes	0.115629	0.85106	isTarget1
GPR126	BLCA	Random genes	-0.650154	0.260245	isTarget1
GPR126	COREAD	Random genes	-0.152494	0.67602	isTarget1
GPR126	HNSC	Random genes	0.149338	0.762561	isTarget1
GPR126	LUAD	Random genes	-0.235388	0.466272	isTarget1
GPR27	LUAD	Random genes	0	0.566412	isTarget1
GPR83	BLCA	Random genes	-0.642894	0.448278	isTarget1
GPR83	COREAD	Random genes	-0.324667	0.664214	isTarget1
GPR83	HNSC	Random genes	-0.733136	0.487778	isTarget1
GPR83	LUAD	Random genes	-0.12841	0.745416	isTarget1
GPS2	BLCA	Cancer genes	1.66442	0.0123023	isTarget1
GPS2	COREAD	Cancer genes	0.98314	0.380035	isTarget1
GPS2	HNSC	Cancer genes	1.05892	0.231382	isTarget1
GPS2	LUAD	Cancer genes	-4.40828e-11	0.714904	isTarget1
GPSM1	BLCA	Random genes	1.42363	0.198852	isTarget1
GPSM1	COREAD	Random genes	-0.480011	0.692592	isTarget1
GPSM1	HNSC	Random genes	-0.838156	0.36269	isTarget1
GPSM1	LUAD	Random genes	0.352761	0.776857	isTarget1
GPX3	BLCA	Random genes	-1.38746	0.331988	isTarget1
GPX3	COREAD	Random genes	-1.34349	0.375997	isTarget1
GPX3	HNSC	Random genes	-0.811041	0.432417	isTarget1
GPX3	LUAD	Random genes	-1.98126	0.223797	isTarget1
GRIK2	BLCA	Random genes	0.792551	0.281998	isTarget1
GRIK2	COREAD	Random genes	1.1162	0.0704625	isTarget1
GRIK2	HNSC	Random genes	0.541485	0.382294	isTarget1
GRIK2	LUAD	Random genes	0.446105	0.309519	isTarget1
GRIN2A	BLCA	Cancer genes	1.1587	0.23897	isTarget1
GRIN2A	COREAD	Cancer genes	1.03943	0.0776402	isTarget1
GRIN2A	HNSC	Cancer genes	1.48826	0.114547	isTarget1
GRIN2A	LUAD	Cancer genes	1.72575	0.00579165	isTarget1
GRM3	BLCA	Cancer genes	-0.259826	0.583001	isTarget1
GRM3	COREAD	Cancer genes	-0.414699	0.438924	isTarget1
GRM3	HNSC	Cancer genes	0.71278	0.0570045	isTarget1
GRM3	LUAD	Cancer genes	-1.01493	0.0167202	isTarget1
GSK3A	BLCA	Random genes	-0.514852	0.419808	isTarget1
GSK3A	COREAD	Random genes	-0.634147	0.4628	isTarget1
GSK3A	HNSC	Random genes	-1.7466e-11	0.779141	isTarget1
GSK3A	LUAD	Random genes	-1.46767	0.204151	isTarget1
H3F3A	BLCA	Cancer genes	2.89742	0.0637714	isTarget1
H3F3A	LUAD	Cancer genes	-0.784204	0.509099	isTarget1
H3F3B	BLCA	Cancer genes	1.12716	0.166552	isTarget1
H3F3B	COREAD	Cancer genes	6.85854e-13	1	isTarget1
H3F3B	HNSC	Cancer genes	1.52954	0.147021	isTarget1
H3F3B	LUAD	Cancer genes	0.405845	0.49469	isTarget1
HAX1	BLCA	Random genes	-0.346951	0.634162	isTarget1
HAX1	COREAD	Random genes	1.99368e-09	0.899218	isTarget1
HAX1	HNSC	Random genes	0.417987	0.477802	isTarget1
HAX1	LUAD	Random genes	0.44794	0.560491	isTarget1
HCN3	BLCA	Random genes	-0.945469	0.199566	isTarget1
HCN3	COREAD	Random genes	0.165459	0.688409	isTarget1
HCN3	HNSC	Random genes	-0.897351	0.274837	isTarget1
HCN3	LUAD	Random genes	-0.506482	0.365085	isTarget1
HCN4	BLCA	Random genes	0.881716	0.399214	isTarget1
HCN4	COREAD	Random genes	-0.381563	0.769426	isTarget1
HCN4	HNSC	Random genes	-3.26659e-10	1	isTarget1
HCN4	LUAD	Random genes	0.372798	0.581312	isTarget1
HDAC7	BLCA	Random genes	-1.10605	0.321336	isTarget1
HDAC7	COREAD	Random genes	0.239186	0.621508	isTarget1
HDAC7	HNSC	Random genes	0.315121	0.551864	isTarget1
HDAC7	LUAD	Random genes	-0.813632	0.296483	isTarget1
HEY1	BLCA	Cancer genes	-0.402388	0.488351	isTarget1
HEY1	COREAD	Cancer genes	-1.21083e-11	0.773044	isTarget1
HEY1	LUAD	Cancer genes	-0.338331	0.80742	isTarget1
HHAT	LUAD	Random genes	1.36359e-09	0.664214	isTarget1
HHIPL1	BLCA	Random genes	0.263826	0.67602	isTarget1
HHIPL1	COREAD	Random genes	-0.50136	0.77113	isTarget1
HHIPL1	HNSC	Random genes	8.61488e-11	0.881021	isTarget1
HHIPL1	LUAD	Random genes	-0.173979	0.669726	isTarget1
HHLA3	BLCA	Random genes	-0.814974	0.641348	isTarget1
HHLA3	HNSC	Random genes	1.28137e-15	0.65045	isTarget1
HHLA3	LUAD	Random genes	-4.80514e-16	0.613773	isTarget1
HIF1A	BLCA	Cancer genes	0.556269	0.478277	isTarget1
HIF1A	HNSC	Cancer genes	-1.82621e-10	0.804674	isTarget1
HIF1A	LUAD	Cancer genes	-0.591907	0.320763	isTarget1
HILPDA	BLCA	Random genes	6.40685e-16	0.754465	isTarget1
HILPDA	COREAD	Random genes	1.28137e-15	0.787932	isTarget1
HILPDA	HNSC	Random genes	1.3609	0.424617	isTarget1
HILPDA	LUAD	Random genes	0.864326	0.635107	isTarget1
HIST3H3	BLCA	Random genes	-0.821904	0.424617	isTarget1
HIST3H3	COREAD	Random genes	1.42948	0.228307	isTarget1
HIST3H3	HNSC	Random genes	0.49351	0.745416	isTarget1
HIST3H3	LUAD	Random genes	1.52806	0.0369857	isTarget1
HLA-A	BLCA	Cancer genes	-0.74053	0.461389	isTarget1
HLA-A	COREAD	Cancer genes	1.61148	0.0417029	isTarget1
HLA-A	HNSC	Cancer genes	0.396304	0.390629	isTarget1
HLA-A	LUAD	Cancer genes	-0.456662	0.844237	isTarget1
HLA-B	BLCA	Cancer genes	0.242725	0.573199	isTarget1
HLA-B	COREAD	Cancer genes	1.17235	0.059483	isTarget1
HLA-B	HNSC	Cancer genes	2.42201	3.24702e-06	isTarget1
HLA-B	LUAD	Cancer genes	0.76461	0.290442	isTarget1
HLA-DOB	BLCA	Random genes	-1.93361	0.235163	isTarget1
HLA-DOB	COREAD	Random genes	0.487206	0.719105	isTarget1
HLA-DOB	HNSC	Random genes	-8.6168e-11	0.738401	isTarget1
HLA-DOB	LUAD	Random genes	-0.472019	0.649315	isTarget1
HMGA1	BLCA	Cancer genes	1.06422	0.3378	isTarget1
HMGA1	COREAD	Cancer genes	-0.78776	0.524488	isTarget1
HMGA1	HNSC	Cancer genes	-0.803466	0.460458	isTarget1
HMGA1	LUAD	Cancer genes	-0.85463	0.389399	isTarget1
HMGA2	BLCA	Cancer genes	-0.483485	0.63904	isTarget1
HMGA2	COREAD	Cancer genes	-2.05652	0.228307	isTarget1
HMGA2	HNSC	Cancer genes	0.412744	0.541052	isTarget1
HMGA2	LUAD	Cancer genes	0.387017	0.645869	isTarget1
HNF1A	BLCA	Cancer genes	0.162313	0.726409	isTarget1
HNF1A	COREAD	Cancer genes	0.623473	0.44615	isTarget1
HNF1A	HNSC	Cancer genes	-0.253793	0.677915	isTarget1
HNF1A	LUAD	Cancer genes	0.621261	0.287281	isTarget1
HNRNPA2B1	BLCA	Cancer genes	2.40642	0.0183038	isTarget1
HNRNPA2B1	LUAD	Cancer genes	0.183053	0.606485	isTarget1
HOOK3	BLCA	Cancer genes	-0.712074	0.421881	isTarget1
HOOK3	COREAD	Cancer genes	-0.201966	0.621508	isTarget1
HOOK3	HNSC	Cancer genes	0.342981	0.664214	isTarget1
HOOK3	LUAD	Cancer genes	0.154151	0.78161	isTarget1
HOPX	BLCA	Random genes	0.618014	0.464347	isTarget1
HOPX	COREAD	Random genes	0	0.957024	isTarget1
HOPX	HNSC	Random genes	1.17543e-11	0.800419	isTarget1
HOPX	LUAD	Random genes	-1.56308e-11	0.886233	isTarget1
HPS5	COREAD	Random genes	-1.51268	0.155779	isTarget1
HPS5	HNSC	Random genes	-2.31632e-11	0.855857	isTarget1
HPS5	LUAD	Random genes	-0.218484	0.572012	isTarget1
HRAS	BLCA	Cancer genes	3.22333	0	isTarget1
HRAS	COREAD	Cancer genes	1.35584	0.228215	isTarget1
HRAS	HNSC	Cancer genes	5.38673	0	isTarget1
HRAS	LUAD	Cancer genes	1.26265	0.28937	isTarget1
HRH4	BLCA	Random genes	2.20149e-11	0.902664	isTarget1
HRH4	COREAD	Random genes	0.667572	0.477061	isTarget1
HRH4	HNSC	Random genes	0.299272	0.672582	isTarget1
HRH4	LUAD	Random genes	0.568469	0.344595	isTarget1
HS3ST1	BLCA	Random genes	-0.812982	0.348365	isTarget1
HS3ST1	COREAD	Random genes	-0.425121	0.536326	isTarget1
HS3ST1	HNSC	Random genes	-1.19421	0.365085	isTarget1
HS3ST1	LUAD	Random genes	-1.94567e-10	0.67354	isTarget1
HS6ST1	BLCA	Cancer genes	-0.370914	0.552502	isTarget1
HS6ST1	COREAD	Cancer genes	-1.2772	0.208242	isTarget1
HS6ST1	HNSC	Cancer genes	0.823299	0.376334	isTarget1
HS6ST1	LUAD	Cancer genes	0.497148	0.572012	isTarget1
HSD17B4	BLCA	Random genes	-0.199224	0.576948	isTarget1
HSD17B4	COREAD	Random genes	-1.22023	0.207031	isTarget1
HSD17B4	HNSC	Random genes	0.291557	0.606485	isTarget1
HSD17B4	LUAD	Random genes	-0.696046	0.29263	isTarget1
HSPA13	BLCA	Random genes	1.11508	0.208515	isTarget1
HSPA13	HNSC	Random genes	1.26027	0.252456	isTarget1
HSPA13	LUAD	Random genes	1.1748	0.140898	isTarget1
HTR3C	BLCA	Random genes	-0.223018	0.633369	isTarget1
HTR3C	COREAD	Random genes	0.227325	0.817636	isTarget1
HTR3C	HNSC	Random genes	0.933056	0.299583	isTarget1
HTR3C	LUAD	Random genes	-0.159454	0.633369	isTarget1
ID3	BLCA	Cancer genes	0.499464	0.67354	isTarget1
ID3	COREAD	Cancer genes	0.57113	0.527295	isTarget1
ID3	HNSC	Cancer genes	-9.61028e-16	0.677915	isTarget1
ID3	LUAD	Cancer genes	1.05292	0.320559	isTarget1
IDH1	BLCA	Cancer genes	0.437844	0.43447	isTarget1
IDH1	COREAD	Cancer genes	2.37669e-11	0.752246	isTarget1
IDH1	HNSC	Cancer genes	0.697342	0.341912	isTarget1
IDH1	LUAD	Cancer genes	-6.21667e-11	0.787932	isTarget1
IDH2	BLCA	Cancer genes	-6.20632e-12	0.881021	isTarget1
IDH2	COREAD	Cancer genes	-0.472481	0.543959	isTarget1
IDH2	HNSC	Cancer genes	-0.357034	0.716145	isTarget1
IDH2	LUAD	Cancer genes	-0.842594	0.382439	isTarget1
IGF2BP2	BLCA	Cancer genes	0.210616	0.745416	isTarget1
IGF2BP2	COREAD	Cancer genes	-0.635065	0.415258	isTarget1
IGF2BP2	HNSC	Cancer genes	-0.708367	0.533692	isTarget1
IGF2BP2	LUAD	Cancer genes	0.21175	0.663516	isTarget1
IKBKB	BLCA	Cancer genes	0.497596	0.698084	isTarget1
IKBKB	COREAD	Cancer genes	-0.842471	0.396171	isTarget1
IKBKB	HNSC	Cancer genes	0.680317	0.422501	isTarget1
IKBKB	LUAD	Cancer genes	-0.830808	0.452814	isTarget1
IL6ST	BLCA	Cancer genes	1.99711e-11	0.815553	isTarget1
IL6ST	COREAD	Cancer genes	0.34515	0.54786	isTarget1
IL6ST	HNSC	Cancer genes	-1.89403e-12	0.700646	isTarget1
IL6ST	LUAD	Cancer genes	-5.3454e-12	0.866715	isTarget1
IMPA2	BLCA	Random genes	0.605046	0.497104	isTarget1
IMPA2	COREAD	Random genes	0.683196	0.340869	isTarget1
IMPA2	HNSC	Random genes	-1.40366e-11	1	isTarget1
IMPA2	LUAD	Random genes	-0.677284	0.492526	isTarget1
INSL5	BLCA	Random genes	1.15164e-10	0.717485	isTarget1
INSL5	HNSC	Random genes	0.670616	0.464347	isTarget1
INSL5	LUAD	Random genes	1.04641	0.121468	isTarget1
ITK	BLCA	Cancer genes	0.444564	0.400094	isTarget1
ITK	COREAD	Cancer genes	0.394218	0.411074	isTarget1
ITK	HNSC	Cancer genes	-1.57986	0.147937	isTarget1
ITK	LUAD	Cancer genes	-0.25197	0.396271	isTarget1
ITPRIP	BLCA	Random genes	1.62748e-10	0.889169	isTarget1
ITPRIP	COREAD	Random genes	-0.565794	0.44028	isTarget1
ITPRIP	HNSC	Random genes	-1.82474e-11	1	isTarget1
ITPRIP	LUAD	Random genes	0.332257	0.42649	isTarget1
JMJD1C	BLCA	Cancer genes	0.754187	0.388774	isTarget1
JMJD1C	COREAD	Cancer genes	0.3086	1	isTarget1
JMJD1C	HNSC	Cancer genes	0.422139	0.592895	isTarget1
JMJD1C	LUAD	Cancer genes	-0.449068	0.317827	isTarget1
JUN	BLCA	Cancer genes	-0.502147	0.539393	isTarget1
JUN	COREAD	Cancer genes	0.570112	0.621508	isTarget1
JUN	HNSC	Cancer genes	-0.853674	0.452112	isTarget1
JUN	LUAD	Cancer genes	-2.47751e-11	0.855857	isTarget1
KAT7	BLCA	Cancer genes	1.01875	0.181703	isTarget1
KAT7	COREAD	Cancer genes	0.877139	0.314247	isTarget1
KAT7	HNSC	Cancer genes	-2.0818	0.216626	isTarget1
KAT7	LUAD	Cancer genes	1.30558e-10	0.921925	isTarget1
KBTBD2	BLCA	Random genes	0.23219	0.538766	isTarget1
KBTBD2	COREAD	Random genes	0.336014	0.695004	isTarget1
KBTBD2	HNSC	Random genes	-0.330394	0.73374	isTarget1
KBTBD2	LUAD	Random genes	0.276917	0.79477	isTarget1
KCND1	BLCA	Random genes	-0.299714	0.581312	isTarget1
KCND1	COREAD	Random genes	0.602145	0.2998	isTarget1
KCND1	HNSC	Random genes	0.639484	0.414535	isTarget1
KCND1	LUAD	Random genes	-0.409474	0.439586	isTarget1
KCNJ5	BLCA	Cancer genes	3.35783e-12	0.85106	isTarget1
KCNJ5	COREAD	Cancer genes	-0.884849	0.362031	isTarget1
KCNJ5	HNSC	Cancer genes	-0.289204	0.713498	isTarget1
KCNJ5	LUAD	Cancer genes	-0.219646	0.709641	isTarget1
KCNQ3	BLCA	Random genes	1.29109	0.161874	isTarget1
KCNQ3	COREAD	Random genes	-0.351229	0.548791	isTarget1
KCNQ3	HNSC	Random genes	0.905133	0.131865	isTarget1
KCNQ3	LUAD	Random genes	1.46224e-10	0.757208	isTarget1
KCNT2	BLCA	Cancer genes	-0.442093	0.329402	isTarget1
KCNT2	COREAD	Cancer genes	0.388288	0.252589	isTarget1
KCNT2	HNSC	Cancer genes	0.209496	0.586082	isTarget1
KCNT2	LUAD	Cancer genes	0.515049	0.0578885	isTarget1
KCNV1	BLCA	Random genes	-0.387701	0.434889	isTarget1
KCNV1	COREAD	Random genes	-1.19756	0.0582147	isTarget1
KCNV1	HNSC	Random genes	-1.0679	0.0695899	isTarget1
KCNV1	LUAD	Random genes	-2.06517	1.73255e-06	isTarget1
KCNV2	BLCA	Random genes	-0.23843	0.65045	isTarget1
KCNV2	COREAD	Random genes	0.328492	0.449699	isTarget1
KCNV2	HNSC	Random genes	2.95205e-11	0.551864	isTarget1
KCNV2	LUAD	Random genes	0.702424	0.126489	isTarget1
KDM5C	BLCA	Cancer genes	-0.873352	0.286185	isTarget1
KDM5C	COREAD	Cancer genes	0.670256	0.2998	isTarget1
KDM5C	HNSC	Cancer genes	1.10274	0.180087	isTarget1
KDM5C	LUAD	Cancer genes	0.612652	0.213628	isTarget1
KDM6A	BLCA	Cancer genes	3.00002	1.3524e-05	isTarget1
KDM6A	COREAD	Cancer genes	-0.813785	0.325213	isTarget1
KDM6A	HNSC	Cancer genes	1.3839	0.199574	isTarget1
KDM6A	LUAD	Cancer genes	-0.782889	0.188906	isTarget1
KDM7A	BLCA	Random genes	-1.36204e-10	0.699148	isTarget1
KDM7A	COREAD	Random genes	0.544239	0.275922	isTarget1
KDM7A	HNSC	Random genes	0.698171	0.403046	isTarget1
KDM7A	LUAD	Random genes	-0.494188	0.357664	isTarget1
KDR	BLCA	Cancer genes	-5.64668e-12	0.949852	isTarget1
KDR	COREAD	Cancer genes	0.57604	0.236747	isTarget1
KDR	HNSC	Cancer genes	0.188583	0.717485	isTarget1
KDR	LUAD	Cancer genes	1.20273	0.00454827	isTarget1
KEAP1	BLCA	Cancer genes	0.345578	0.581933	isTarget1
KEAP1	COREAD	Cancer genes	-0.890646	0.282781	isTarget1
KEAP1	HNSC	Cancer genes	2.72619	0	isTarget1
KEAP1	LUAD	Cancer genes	3.82778	0	isTarget1
KIAA0232	BLCA	Random genes	0.24404	0.599008	isTarget1
KIAA0232	COREAD	Random genes	1.06724	0.281277	isTarget1
KIAA0232	HNSC	Random genes	0.254725	0.56707	isTarget1
KIAA0232	LUAD	Random genes	-0.278405	0.312926	isTarget1
KIAA0895	BLCA	Random genes	-1.08237	0.317511	isTarget1
KIAA0895	COREAD	Random genes	2.93946e-12	1	isTarget1
KIAA0895	HNSC	Random genes	-0.639905	0.49469	isTarget1
KIAA0895	LUAD	Random genes	-0.35132	0.516056	isTarget1
KIAA0947	BLCA	Random genes	0.184534	0.787932	isTarget1
KIAA0947	COREAD	Random genes	0.208846	0.738401	isTarget1
KIAA0947	HNSC	Random genes	-0.663513	0.305456	isTarget1
KIAA0947	LUAD	Random genes	0.181796	0.949852	isTarget1
KIT	BLCA	Cancer genes	0.111399	0.658628	isTarget1
KIT	COREAD	Cancer genes	-0.456858	0.36059	isTarget1
KIT	HNSC	Cancer genes	-5.44828e-10	0.828551	isTarget1
KIT	LUAD	Cancer genes	-1.23831	0.00663682	isTarget1
KITLG	BLCA	Random genes	0.980065	0.191247	isTarget1
KITLG	COREAD	Random genes	-1.4651	0.305988	isTarget1
KITLG	HNSC	Random genes	-2.27426e-11	0.957024	isTarget1
KITLG	LUAD	Random genes	6.6128e-10	0.85106	isTarget1
KLF4	BLCA	Cancer genes	0.831499	0.321815	isTarget1
KLF4	COREAD	Cancer genes	-2.04633	0.249619	isTarget1
KLF4	HNSC	Cancer genes	-0.496438	0.581933	isTarget1
KLF4	LUAD	Cancer genes	0.507533	0.308017	isTarget1
KLF6	BLCA	Cancer genes	2.33968	0.0416489	isTarget1
KLF6	HNSC	Cancer genes	5.00667e-11	1	isTarget1
KLF6	LUAD	Cancer genes	0.868978	0.340387	isTarget1
KLK2	BLCA	Cancer genes	9.61028e-16	0.902664	isTarget1
KLK2	COREAD	Cancer genes	1.28137e-15	0.957024	isTarget1
KLK2	HNSC	Cancer genes	6.40685e-16	0.975974	isTarget1
KLK2	LUAD	Cancer genes	-2.08223e-15	0.783717	isTarget1
KLKB1	BLCA	Random genes	-0.362682	0.478277	isTarget1
KLKB1	HNSC	Random genes	1.56127	0.16184	isTarget1
KLKB1	LUAD	Random genes	-0.892695	0.167789	isTarget1
KMT2A	BLCA	Cancer genes	0.862546	0.0154946	isTarget1
KMT2A	COREAD	Cancer genes	-0.53202	0.270989	isTarget1
KMT2A	HNSC	Cancer genes	0.392054	0.471905	isTarget1
KMT2A	LUAD	Cancer genes	0.139074	0.672582	isTarget1
KMT2D	BLCA	Cancer genes	1.09816	0.142882	isTarget1
KMT2D	COREAD	Cancer genes	1.04918	0.252853	isTarget1
KMT2D	HNSC	Cancer genes	1.5543	0.0486392	isTarget1
KMT2D	LUAD	Cancer genes	-2.34974e-09	0.746916	isTarget1
KNSTRN	BLCA	Cancer genes	-0.47583	0.448278	isTarget1
KNSTRN	COREAD	Cancer genes	1.71714	0.0954601	isTarget1
KNSTRN	HNSC	Cancer genes	-0.473676	0.647048	isTarget1
KNSTRN	LUAD	Cancer genes	-0.467239	0.564369	isTarget1
KRAS	BLCA	Cancer genes	4.15751	0	isTarget1
KRAS	COREAD	Cancer genes	8.70829	0	isTarget1
KRAS	LUAD	Cancer genes	6.65377	0	isTarget1
KREMEN2	BLCA	Random genes	-0.278591	0.624387	isTarget1
KREMEN2	COREAD	Random genes	-1.18037	0.281277	isTarget1
KREMEN2	HNSC	Random genes	-2.27303e-10	1	isTarget1
KREMEN2	LUAD	Random genes	-0.909249	0.308503	isTarget1
KRT26	BLCA	Random genes	2.8228e-11	1	isTarget1
KRT26	COREAD	Random genes	0.455353	0.559648	isTarget1
KRT26	HNSC	Random genes	-4.00468e-10	0.915253	isTarget1
KRT26	LUAD	Random genes	0.761559	0.178026	isTarget1
KRTAP19-8	COREAD	Random genes	-0.803434	0.541052	isTarget1
KRTAP19-8	LUAD	Random genes	-0.912606	0.345925	isTarget1
LARP4B	BLCA	Cancer genes	0.225347	0.787932	isTarget1
LARP4B	COREAD	Cancer genes	0.369128	0.556321	isTarget1
LARP4B	HNSC	Cancer genes	0.269659	0.757208	isTarget1
LARP4B	LUAD	Cancer genes	0.343503	0.495409	isTarget1
LARP7	COREAD	Random genes	-0.920499	0.382439	isTarget1
LARP7	LUAD	Random genes	-0.711707	0.343072	isTarget1
LATS2	BLCA	Cancer genes	-0.65075	0.320559	isTarget1
LATS2	COREAD	Cancer genes	0.587965	0.252589	isTarget1
LATS2	HNSC	Cancer genes	0.471775	0.44781	isTarget1
LATS2	LUAD	Cancer genes	0.806052	0.170074	isTarget1
LCA5	BLCA	Random genes	0.469508	0.473303	isTarget1
LCA5	COREAD	Random genes	0.184952	0.77113	isTarget1
LCA5	HNSC	Random genes	0.415471	0.459055	isTarget1
LCA5	LUAD	Random genes	-1.10707e-11	0.892618	isTarget1
LCP1	BLCA	Cancer genes	0.292824	0.696622	isTarget1
LCP1	COREAD	Cancer genes	-0.541134	0.33813	isTarget1
LCP1	HNSC	Cancer genes	1.34213	0.0307446	isTarget1
LCP1	LUAD	Cancer genes	0.108845	0.943432	isTarget1
LCTL	BLCA	Random genes	0.548973	0.409616	isTarget1
LCTL	COREAD	Random genes	-0.984993	0.256476	isTarget1
LCTL	HNSC	Random genes	-1.54543	0.29232	isTarget1
LCTL	LUAD	Random genes	-0.302203	0.477802	isTarget1
LDLRAD4	BLCA	Random genes	-0.337995	0.85106	isTarget1
LDLRAD4	HNSC	Random genes	1.12989	0.198408	isTarget1
LDLRAD4	LUAD	Random genes	0.337395	0.369861	isTarget1
LEPROTL1	BLCA	Cancer genes	-0.800671	0.529173	isTarget1
LEPROTL1	LUAD	Cancer genes	-0.80758	0.570966	isTarget1
LHX3	BLCA	Random genes	0.305353	0.684631	isTarget1
LHX3	COREAD	Random genes	-0.668441	0.378818	isTarget1
LHX3	HNSC	Random genes	-2.29398	0.0366966	isTarget1
LHX3	LUAD	Random genes	-2.93103e-10	0.833583	isTarget1
LIPK	LUAD	Random genes	0.490889	0.406123	isTarget1
LIPN	LUAD	Random genes	-0.487555	0.508143	isTarget1
LOXL3	BLCA	Random genes	1.30383e-10	0.912545	isTarget1
LOXL3	COREAD	Random genes	-0.244673	0.717485	isTarget1
LOXL3	HNSC	Random genes	0.370744	0.489787	isTarget1
LOXL3	LUAD	Random genes	0.429605	0.439586	isTarget1
LRFN1	BLCA	Random genes	0.47052	0.403046	isTarget1
LRFN1	COREAD	Random genes	0.807232	0.12313	isTarget1
LRFN1	HNSC	Random genes	1.13411e-11	0.826591	isTarget1
LRFN1	LUAD	Random genes	0.291226	0.553275	isTarget1
LRIG3	BLCA	Cancer genes	-0.171894	0.743627	isTarget1
LRIG3	COREAD	Cancer genes	0.410015	0.426914	isTarget1
LRIG3	HNSC	Cancer genes	0.208515	0.745416	isTarget1
LRIG3	LUAD	Cancer genes	-0.162506	0.775016	isTarget1
LRRC31	BLCA	Random genes	-0.133288	0.787932	isTarget1
LRRC31	COREAD	Random genes	0.47521	0.479096	isTarget1
LRRC31	HNSC	Random genes	2.3894e-11	1	isTarget1
LRRC31	LUAD	Random genes	1.07244e-10	0.789843	isTarget1
LRRC8E	BLCA	Random genes	-0.923163	0.248982	isTarget1
LRRC8E	COREAD	Random genes	-0.381573	0.499551	isTarget1
LRRC8E	HNSC	Random genes	0.359229	0.498926	isTarget1
LRRC8E	LUAD	Random genes	-0.542775	0.367009	isTarget1
LSM1	BLCA	Random genes	-2.18474e-13	0.79669	isTarget1
LSM1	COREAD	Random genes	-2.11734e-10	0.861659	isTarget1
LSM1	HNSC	Random genes	1.16701	0.256966	isTarget1
LSM1	LUAD	Random genes	1.30279e-10	0.846471	isTarget1
LTBP1	BLCA	Random genes	0.202898	0.64841	isTarget1
LTBP1	COREAD	Random genes	-1.31143	0.0722397	isTarget1
LTBP1	HNSC	Random genes	0.172448	0.773044	isTarget1
LTBP1	LUAD	Random genes	0.770465	0.147261	isTarget1
LZTR1	BLCA	Cancer genes	-0.338088	0.594134	isTarget1
LZTR1	COREAD	Cancer genes	-0.381479	0.498926	isTarget1
LZTR1	HNSC	Cancer genes	0.241948	0.618846	isTarget1
LZTR1	LUAD	Cancer genes	0.741034	0.150949	isTarget1
MAF	BLCA	Cancer genes	3.61286e-11	1	isTarget1
MAF	LUAD	Cancer genes	-1.1812	0.181703	isTarget1
MAFB	BLCA	Cancer genes	-0.603454	0.609844	isTarget1
MAFB	COREAD	Cancer genes	-0.629312	0.397007	isTarget1
MAFB	HNSC	Cancer genes	0.427338	0.401818	isTarget1
MAFB	LUAD	Cancer genes	-1.91575	0.142628	isTarget1
MAGEA6	LUAD	Random genes	5.12524	0.0401809	isTarget1
MAGI2	BLCA	Cancer genes	0.168738	0.906051	isTarget1
MAGI2	COREAD	Cancer genes	0.575442	0.352538	isTarget1
MAGI2	HNSC	Cancer genes	0.160397	0.822135	isTarget1
MAGI2	LUAD	Cancer genes	-1.83857	0.000353672	isTarget1
MALT1	BLCA	Cancer genes	0.448101	0.465222	isTarget1
MALT1	COREAD	Cancer genes	0.589288	0.432417	isTarget1
MALT1	HNSC	Cancer genes	0.28772	0.754465	isTarget1
MALT1	LUAD	Cancer genes	0.400331	0.479775	isTarget1
MAML2	BLCA	Cancer genes	1.59614	0.192757	isTarget1
MAML2	COREAD	Cancer genes	1.23349e-10	0.817636	isTarget1
MAML2	HNSC	Cancer genes	-0.728066	0.38137	isTarget1
MAML2	LUAD	Cancer genes	-0.906351	0.222987	isTarget1
MAP2K1	BLCA	Cancer genes	-0.480513	0.566412	isTarget1
MAP2K1	COREAD	Cancer genes	0.922833	0.492526	isTarget1
MAP2K1	HNSC	Cancer genes	1.35888	0.123387	isTarget1
MAP2K1	LUAD	Cancer genes	-1.55384e-11	0.789843	isTarget1
MAP2K2	BLCA	Cancer genes	0.30172	0.594134	isTarget1
MAP2K2	COREAD	Cancer genes	0.673166	0.506788	isTarget1
MAP2K2	HNSC	Cancer genes	1.34011	0.254801	isTarget1
MAP2K2	LUAD	Cancer genes	0.360906	0.726409	isTarget1
MAP2K4	COREAD	Cancer genes	2.34608	0.00325831	isTarget1
MAP2K4	LUAD	Cancer genes	0.231994	0.765568	isTarget1
MAP2K7	BLCA	Cancer genes	-0.518337	0.551864	isTarget1
MAP2K7	COREAD	Cancer genes	2.03496	3.24702e-06	isTarget1
MAP2K7	HNSC	Cancer genes	-1.15309	0.309928	isTarget1
MAP2K7	LUAD	Cancer genes	0.898321	0.191064	isTarget1
MAP3K1	BLCA	Cancer genes	-0.392092	0.505996	isTarget1
MAP3K1	COREAD	Cancer genes	0.635672	0.322788	isTarget1
MAP3K1	HNSC	Cancer genes	0.289736	0.619608	isTarget1
MAP3K1	LUAD	Cancer genes	1.25844e-10	0.946615	isTarget1
MAP4K5	BLCA	Random genes	0.174808	0.773044	isTarget1
MAP4K5	COREAD	Random genes	-1.83161	0.147798	isTarget1
MAP4K5	HNSC	Random genes	-1.19875	0.190836	isTarget1
MAP4K5	LUAD	Random genes	-0.153844	0.604532	isTarget1
MAPK1	BLCA	Cancer genes	-0.386123	0.537959	isTarget1
MAPK1	COREAD	Cancer genes	2.4644e-12	0.773044	isTarget1
MAPK1	HNSC	Cancer genes	1.73538	0.0256271	isTarget1
MAPK1	LUAD	Cancer genes	0.990653	0.284614	isTarget1
MARCO	BLCA	Random genes	1.23126e-09	0.695004	isTarget1
MARCO	COREAD	Random genes	1.98041	0.0651924	isTarget1
MARCO	HNSC	Random genes	0.466923	0.533692	isTarget1
MARCO	LUAD	Random genes	1.63569	0.0342003	isTarget1
MAX	BLCA	Cancer genes	-0.474986	0.657117	isTarget1
MAX	COREAD	Cancer genes	1.40335	0.213628	isTarget1
MAX	HNSC	Cancer genes	-7.16879e-12	0.831321	isTarget1
MAX	LUAD	Cancer genes	2.12529	3.30633e-05	isTarget1
MB21D2	BLCA	Cancer genes	-0.352429	0.798632	isTarget1
MB21D2	HNSC	Cancer genes	4.44539e-12	0.864226	isTarget1
MB21D2	LUAD	Cancer genes	0.885787	0.285998	isTarget1
MBD6	BLCA	Cancer genes	1.13761	0.0240102	isTarget1
MBD6	COREAD	Cancer genes	0.684558	0.306935	isTarget1
MBD6	HNSC	Cancer genes	0.690837	0.313504	isTarget1
MBD6	LUAD	Cancer genes	-1.38411	0.0947304	isTarget1
MCUR1	BLCA	Random genes	-0.310561	0.635107	isTarget1
MCUR1	COREAD	Random genes	-1.49012	0.336826	isTarget1
MCUR1	HNSC	Random genes	0.849138	0.388186	isTarget1
MCUR1	LUAD	Random genes	4.529e-12	0.87014	isTarget1
MDM2	BLCA	Cancer genes	-0.251152	0.539393	isTarget1
MDM2	COREAD	Cancer genes	0.711954	0.559648	isTarget1
MDM2	HNSC	Cancer genes	-0.678013	0.449699	isTarget1
MDM2	LUAD	Cancer genes	-0.469505	0.498926	isTarget1
MEN1	BLCA	Cancer genes	-0.44394	0.509808	isTarget1
MEN1	COREAD	Cancer genes	0.788048	0.230802	isTarget1
MEN1	HNSC	Cancer genes	-0.644126	0.487053	isTarget1
MEN1	LUAD	Cancer genes	-0.385134	0.462136	isTarget1
MET	BLCA	Cancer genes	0.132018	0.703525	isTarget1
MET	COREAD	Cancer genes	0.438172	0.558759	isTarget1
MET	HNSC	Cancer genes	-0.574833	0.485725	isTarget1
MET	LUAD	Cancer genes	0.59545	0.364482	isTarget1
MFSD6	BLCA	Random genes	0.629952	0.370398	isTarget1
MFSD6	COREAD	Random genes	-5.00535e-13	1	isTarget1
MFSD6	HNSC	Random genes	-0.805414	0.396449	isTarget1
MFSD6	LUAD	Random genes	0.389515	0.458287	isTarget1
MGA	BLCA	Cancer genes	0.687393	0.130961	isTarget1
MGA	COREAD	Cancer genes	1.21381	0.0520578	isTarget1
MGA	HNSC	Cancer genes	-0.246126	0.603528	isTarget1
MGA	LUAD	Cancer genes	1.02228	0.00663989	isTarget1
MGMT	BLCA	Cancer genes	0.550727	0.625444	isTarget1
MGMT	COREAD	Cancer genes	0.392085	0.665891	isTarget1
MGMT	HNSC	Cancer genes	1.98959	0.012165	isTarget1
MGMT	LUAD	Cancer genes	1.8442e-10	0.853143	isTarget1
MGRN1	BLCA	Random genes	0.186015	0.703525	isTarget1
MGRN1	COREAD	Random genes	-0.237504	0.579995	isTarget1
MGRN1	HNSC	Random genes	-0.283177	0.608716	isTarget1
MGRN1	LUAD	Random genes	0.92923	0.177762	isTarget1
MICALL1	BLCA	Random genes	0.373745	0.448278	isTarget1
MICALL1	COREAD	Random genes	-0.529339	0.517844	isTarget1
MICALL1	HNSC	Random genes	-0.740415	0.337636	isTarget1
MICALL1	LUAD	Random genes	0.166111	0.844237	isTarget1
MISP	BLCA	Random genes	0.460141	0.551864	isTarget1
MISP	COREAD	Random genes	-1.169	0.288508	isTarget1
MISP	HNSC	Random genes	0.495593	0.383769	isTarget1
MISP	LUAD	Random genes	-0.395818	0.413695	isTarget1
MITF	BLCA	Cancer genes	0.937077	0.325285	isTarget1
MITF	COREAD	Cancer genes	1.7669	0.0755401	isTarget1
MITF	LUAD	Cancer genes	0.531863	0.373023	isTarget1
MLH1	BLCA	Cancer genes	0.154459	0.80742	isTarget1
MLH1	COREAD	Cancer genes	0.608169	0.411735	isTarget1
MLH1	HNSC	Cancer genes	0.942977	0.232055	isTarget1
MLH1	LUAD	Cancer genes	0.141812	0.783717	isTarget1
MLNR	BLCA	Random genes	0.277161	0.674685	isTarget1
MLNR	COREAD	Random genes	-0.831468	0.396898	isTarget1
MLNR	HNSC	Random genes	0.426636	0.619608	isTarget1
MLNR	LUAD	Random genes	0.301632	0.43572	isTarget1
MMP15	COREAD	Random genes	-0.883765	0.386586	isTarget1
MMP3	BLCA	Random genes	-1.53928	0.199189	isTarget1
MMP3	COREAD	Random genes	-0.666931	0.392734	isTarget1
MMP3	HNSC	Random genes	-0.929926	0.317197	isTarget1
MMP3	LUAD	Random genes	9.81636e-11	0.858362	isTarget1
MMP7	BLCA	Random genes	-3.09515e-11	0.736671	isTarget1
MMP7	COREAD	Random genes	3.63576e-11	1	isTarget1
MMP7	HNSC	Random genes	-0.858207	0.404485	isTarget1
MMP7	LUAD	Random genes	0.188918	0.729051	isTarget1
MPL	BLCA	Cancer genes	0.423116	0.490682	isTarget1
MPL	COREAD	Cancer genes	2.88308e-14	0.841491	isTarget1
MPL	HNSC	Cancer genes	0.368461	0.700646	isTarget1
MPL	LUAD	Cancer genes	0.309256	0.573199	isTarget1
MROH7	BLCA	Random genes	-0.254841	0.676979	isTarget1
MROH7	COREAD	Random genes	-0.364726	0.641348	isTarget1
MROH7	HNSC	Random genes	-0.879962	0.404179	isTarget1
MROH7	LUAD	Random genes	0.341879	0.502579	isTarget1
MRTO4	BLCA	Random genes	5.55474e-13	0.889169	isTarget1
MRTO4	COREAD	Random genes	-0.479672	0.647048	isTarget1
MRTO4	HNSC	Random genes	0.972491	0.405793	isTarget1
MRTO4	LUAD	Random genes	-1.94322	0.240415	isTarget1
MS4A4A	BLCA	Random genes	0.370713	0.703525	isTarget1
MS4A4A	COREAD	Random genes	-0.352537	0.560491	isTarget1
MS4A4A	HNSC	Random genes	0.560127	0.503307	isTarget1
MS4A4A	LUAD	Random genes	1.12025	0.0183038	isTarget1
MSH2	BLCA	Cancer genes	1.29924e-10	0.662132	isTarget1
MSH2	HNSC	Cancer genes	7.8664e-11	0.64841	isTarget1
MSH2	LUAD	Cancer genes	0.230958	1	isTarget1
MSH6	BLCA	Cancer genes	-0.182152	0.661142	isTarget1
MSH6	COREAD	Cancer genes	-0.202328	0.824042	isTarget1
MSH6	HNSC	Cancer genes	-1.37931	0.166105	isTarget1
MSH6	LUAD	Cancer genes	-0.331707	0.599008	isTarget1
MSTN	BLCA	Random genes	1.94735	0.0174902	isTarget1
MSTN	COREAD	Random genes	0.34404	0.53273	isTarget1
MSTN	HNSC	Random genes	-6.28259e-11	0.764286	isTarget1
MSTN	LUAD	Random genes	0.274249	0.573199	isTarget1
MT1H	BLCA	Random genes	2.0685	0.224331	isTarget1
MT1H	COREAD	Random genes	0.811853	0.720513	isTarget1
MT1H	HNSC	Random genes	0.950725	0.574268	isTarget1
MT1H	LUAD	Random genes	0.851781	0.259307	isTarget1
MT2A	BLCA	Random genes	0	0.73374	isTarget1
MT2A	COREAD	Random genes	-0.792504	0.590896	isTarget1
MT2A	HNSC	Random genes	6.40685e-16	0.692592	isTarget1
MT2A	LUAD	Random genes	8.91728e-11	0.817636	isTarget1
MTFR2	BLCA	Random genes	-1.17067	0.213175	isTarget1
MTFR2	COREAD	Random genes	0.254752	0.714904	isTarget1
MTFR2	HNSC	Random genes	0.302082	0.776857	isTarget1
MTFR2	LUAD	Random genes	-1.30282	0.147911	isTarget1
MTOR	BLCA	Cancer genes	0.470632	0.373023	isTarget1
MTOR	COREAD	Cancer genes	2.09774	0.000605228	isTarget1
MTOR	HNSC	Cancer genes	-0.284723	0.624387	isTarget1
MTOR	LUAD	Cancer genes	-0.178789	0.743627	isTarget1
MUC16	BLCA	Cancer genes	-0.227412	0.68292	isTarget1
MUC16	COREAD	Cancer genes	0.121926	0.70233	isTarget1
MUC16	HNSC	Cancer genes	-0.182101	0.698084	isTarget1
MUC16	LUAD	Cancer genes	-0.349334	0.419202	isTarget1
MUTYH	BLCA	Cancer genes	0	1	isTarget1
MUTYH	COREAD	Cancer genes	0	1	isTarget1
MUTYH	HNSC	Cancer genes	3.20343e-16	1	isTarget1
MUTYH	LUAD	Cancer genes	-4.80514e-16	0.918662	isTarget1
MVB12A	BLCA	Random genes	0.247871	0.591851	isTarget1
MVB12A	COREAD	Random genes	-1.90494	0.247624	isTarget1
MVB12A	HNSC	Random genes	0.699541	0.431323	isTarget1
MVB12A	LUAD	Random genes	9.57825e-13	1	isTarget1
MYB	BLCA	Cancer genes	0.216657	0.597186	isTarget1
MYB	COREAD	Cancer genes	-0.703041	0.405053	isTarget1
MYB	HNSC	Cancer genes	0.276305	0.674685	isTarget1
MYB	LUAD	Cancer genes	-0.606383	0.408147	isTarget1
MYC	BLCA	Cancer genes	-1.56722	0.14495	isTarget1
MYC	COREAD	Cancer genes	-0.670449	0.286185	isTarget1
MYC	HNSC	Cancer genes	-0.313699	0.622631	isTarget1
MYC	LUAD	Cancer genes	-1.44085	0.049299	isTarget1
MYCL	BLCA	Cancer genes	-9.75507e-12	0.800419	isTarget1
MYCL	COREAD	Cancer genes	-0.897475	0.3462	isTarget1
MYCL	HNSC	Cancer genes	0.303867	0.630095	isTarget1
MYCL	LUAD	Cancer genes	-0.5233	0.551864	isTarget1
MYD88	BLCA	Cancer genes	-8.38715e-11	1	isTarget1
MYD88	COREAD	Cancer genes	-1.55799	0.284923	isTarget1
MYD88	HNSC	Cancer genes	-1.4935	0.313504	isTarget1
MYD88	LUAD	Cancer genes	-0.38305	0.653074	isTarget1
MYH9	BLCA	Cancer genes	0.491345	0.233737	isTarget1
MYH9	COREAD	Cancer genes	1.14686e-11	0.953729	isTarget1
MYH9	HNSC	Cancer genes	0.732277	0.162892	isTarget1
MYH9	LUAD	Cancer genes	0.211007	0.557831	isTarget1
MYO3B	BLCA	Random genes	-0.195963	0.614556	isTarget1
MYO3B	COREAD	Random genes	1.21131	0.137845	isTarget1
MYO3B	HNSC	Random genes	1.00519	0.202809	isTarget1
MYO3B	LUAD	Random genes	0.992773	0.0672457	isTarget1
MYOD1	BLCA	Cancer genes	6.40685e-16	0.798632	isTarget1
MYOD1	COREAD	Cancer genes	-2.35729e-11	0.906051	isTarget1
MYOD1	HNSC	Cancer genes	1.56455e-12	1	isTarget1
MYOD1	LUAD	Cancer genes	-3.85127e-11	0.943432	isTarget1
N4BP2	BLCA	Cancer genes	0.276913	0.653074	isTarget1
N4BP2	COREAD	Cancer genes	-0.456718	0.385162	isTarget1
N4BP2	HNSC	Cancer genes	0.217082	0.64368	isTarget1
N4BP2	LUAD	Cancer genes	-0.255941	0.551864	isTarget1
NAA60	BLCA	Random genes	-1.04752e-12	0.726409	isTarget1
NAA60	COREAD	Random genes	-1.44262	0.294462	isTarget1
NAA60	HNSC	Random genes	0.885655	0.49626	isTarget1
NAA60	LUAD	Random genes	0.28764	0.703525	isTarget1
NAB2	BLCA	Cancer genes	-0.92509	0.300625	isTarget1
NAB2	COREAD	Cancer genes	-0.189694	0.87014	isTarget1
NAB2	HNSC	Cancer genes	-0.849404	0.449699	isTarget1
NAB2	LUAD	Cancer genes	-2.20455	0.0891058	isTarget1
NAE1	BLCA	Random genes	2.10627e-10	0.953729	isTarget1
NAE1	COREAD	Random genes	0.319022	0.551061	isTarget1
NAE1	HNSC	Random genes	-0.354831	0.57168	isTarget1
NAE1	LUAD	Random genes	1.28642	0.0695899	isTarget1
NBN	BLCA	Cancer genes	6.29628e-10	0.918662	isTarget1
NBN	COREAD	Cancer genes	1.57892	0.380822	isTarget1
NBN	LUAD	Cancer genes	3.99048e-11	0.902664	isTarget1
NCKAP5L	BLCA	Random genes	-0.232226	0.641348	isTarget1
NCKAP5L	COREAD	Random genes	0.716884	0.192705	isTarget1
NCKAP5L	HNSC	Random genes	-0.214191	0.594134	isTarget1
NCKAP5L	LUAD	Random genes	2.51862e-10	0.85106	isTarget1
NCOR1	BLCA	Cancer genes	1.45359	0.301267	isTarget1
NCOR1	COREAD	Cancer genes	-0.593105	0.519705	isTarget1
NCOR1	HNSC	Cancer genes	-0.506127	0.70233	isTarget1
NCOR1	LUAD	Cancer genes	4.64349e-10	0.714904	isTarget1
NCOR2	BLCA	Cancer genes	-1.35526	0.248308	isTarget1
NCOR2	COREAD	Cancer genes	-1.80575	0.11072	isTarget1
NCOR2	HNSC	Cancer genes	-1.36501	0.199574	isTarget1
NCOR2	LUAD	Cancer genes	-0.993058	0.22873	isTarget1
NDRG1	BLCA	Cancer genes	-1.24032	0.228215	isTarget1
NDRG1	COREAD	Cancer genes	-0.650559	0.3462	isTarget1
NDRG1	HNSC	Cancer genes	-0.935696	0.368524	isTarget1
NDRG1	LUAD	Cancer genes	-1.76085	0.0782006	isTarget1
NEDD4	BLCA	Random genes	-0.335251	0.49626	isTarget1
NEDD4	COREAD	Random genes	-0.303664	0.493211	isTarget1
NEDD4	HNSC	Random genes	-0.530568	0.39974	isTarget1
NEDD4	LUAD	Random genes	0.52552	0.325507	isTarget1
NEDD4L	BLCA	Random genes	-0.723023	0.308503	isTarget1
NEDD4L	COREAD	Random genes	-0.522599	0.487053	isTarget1
NEDD4L	HNSC	Random genes	5.57982e-11	0.841491	isTarget1
NEDD4L	LUAD	Random genes	-0.355248	0.483714	isTarget1
NEIL2	BLCA	Random genes	0.997631	0.278893	isTarget1
NEIL2	LUAD	Random genes	-1.15313e-10	0.776857	isTarget1
NEIL3	BLCA	Random genes	-1.33777	0.244565	isTarget1
NEIL3	COREAD	Random genes	1.06856	0.351134	isTarget1
NEIL3	LUAD	Random genes	0.955048	0.325507	isTarget1
NEUROD6	BLCA	Random genes	4.47663e-11	0.975974	isTarget1
NEUROD6	COREAD	Random genes	-0.198423	0.736671	isTarget1
NEUROD6	HNSC	Random genes	0.507037	0.443158	isTarget1
NEUROD6	LUAD	Random genes	0.180137	0.699148	isTarget1
NF1	BLCA	Cancer genes	0.690435	0.253889	isTarget1
NF1	COREAD	Cancer genes	-0.460628	0.43572	isTarget1
NF1	HNSC	Cancer genes	-1.53984e-10	1	isTarget1
NF1	LUAD	Cancer genes	1.52308	0.00794876	isTarget1
NF2	BLCA	Cancer genes	-7.35026e-13	0.902664	isTarget1
NF2	COREAD	Cancer genes	0.63092	0.450177	isTarget1
NF2	HNSC	Cancer genes	1.73434e-12	0.822135	isTarget1
NF2	LUAD	Cancer genes	-5.85426e-13	0.802512	isTarget1
NFATC2	BLCA	Cancer genes	0.857612	0.138203	isTarget1
NFATC2	COREAD	Cancer genes	0.457478	0.241055	isTarget1
NFATC2	HNSC	Cancer genes	0.776051	0.193403	isTarget1
NFATC2	LUAD	Cancer genes	0.325002	0.3378	isTarget1
NFE2L2	BLCA	Cancer genes	1.86779	7.7646e-06	isTarget1
NFE2L2	COREAD	Cancer genes	0.872808	0.221727	isTarget1
NFE2L2	HNSC	Cancer genes	2.86365	0	isTarget1
NFE2L2	LUAD	Cancer genes	1.60976	0.00660175	isTarget1
NKD2	BLCA	Random genes	-0.915877	0.316198	isTarget1
NKD2	COREAD	Random genes	-1.79276	0.169673	isTarget1
NKD2	HNSC	Random genes	-0.362165	0.525364	isTarget1
NKD2	LUAD	Random genes	0.547785	0.294462	isTarget1
NOBOX	BLCA	Random genes	-0.50288	0.535309	isTarget1
NOBOX	COREAD	Random genes	-9.13137e-12	0.953729	isTarget1
NOBOX	HNSC	Random genes	-0.896796	0.268081	isTarget1
NOBOX	LUAD	Random genes	-0.794377	0.0740906	isTarget1
NOL8	BLCA	Random genes	0.513722	0.64841	isTarget1
NOL8	COREAD	Random genes	-0.783747	0.508143	isTarget1
NOL8	HNSC	Random genes	0.518688	0.633369	isTarget1
NOL8	LUAD	Random genes	-0.813765	0.429986	isTarget1
NOTCH1	BLCA	Cancer genes	0.34367	0.464347	isTarget1
NOTCH1	COREAD	Cancer genes	0.237795	0.489787	isTarget1
NOTCH1	HNSC	Cancer genes	2.56507	0	isTarget1
NOTCH1	LUAD	Cancer genes	0.499389	0.154436	isTarget1
NPHP3	BLCA	Random genes	-0.31877	0.529743	isTarget1
NPHP3	COREAD	Random genes	0.381085	0.450177	isTarget1
NPHP3	HNSC	Random genes	1.12361	0.0846415	isTarget1
NPHP3	LUAD	Random genes	-0.553903	0.387797	isTarget1
NPM1	COREAD	Cancer genes	0.552674	0.798632	isTarget1
NPM1	LUAD	Cancer genes	0.288434	0.864226	isTarget1
NR4A2	BLCA	Random genes	0.953733	0.244074	isTarget1
NR4A2	COREAD	Random genes	1.31157e-09	0.663516	isTarget1
NR4A2	HNSC	Random genes	0.395129	0.597908	isTarget1
NR4A2	LUAD	Random genes	1.14542	0.0354161	isTarget1
NR4A3	BLCA	Cancer genes	-5.00516e-10	0.760821	isTarget1
NR4A3	COREAD	Cancer genes	0.409206	0.346562	isTarget1
NR4A3	HNSC	Cancer genes	0.256658	0.59628	isTarget1
NR4A3	LUAD	Cancer genes	0.409057	0.51525	isTarget1
NRAS	BLCA	Cancer genes	1.88651	0.0221571	isTarget1
NRAS	COREAD	Cancer genes	4.72871	0	isTarget1
NRAS	HNSC	Cancer genes	1.44713	0.22873	isTarget1
NRAS	LUAD	Cancer genes	0.876927	0.271833	isTarget1
NRG1	BLCA	Cancer genes	0.703768	0.274276	isTarget1
NRG1	COREAD	Cancer genes	1.61123	0.00303894	isTarget1
NRG1	HNSC	Cancer genes	-1.52238	0.117616	isTarget1
NRG1	LUAD	Cancer genes	-0.632718	0.228625	isTarget1
NSD1	BLCA	Cancer genes	0.0874377	0.831321	isTarget1
NSD1	COREAD	Cancer genes	-0.434284	0.308994	isTarget1
NSD1	HNSC	Cancer genes	2.16591	0	isTarget1
NSD1	LUAD	Cancer genes	0.252116	0.609844	isTarget1
NT5E	BLCA	Random genes	0.770676	0.422501	isTarget1
NT5E	HNSC	Random genes	-0.927412	0.369004	isTarget1
NT5E	LUAD	Random genes	-0.474444	0.389818	isTarget1
NTHL1	BLCA	Cancer genes	1.15305	0.479775	isTarget1
NTHL1	COREAD	Cancer genes	3.20343e-16	0.87527	isTarget1
NTHL1	HNSC	Cancer genes	-3.20343e-16	0.853143	isTarget1
NTHL1	LUAD	Cancer genes	0.996432	0.542965	isTarget1
NTRK3	BLCA	Cancer genes	0.870641	0.425711	isTarget1
NTRK3	COREAD	Cancer genes	-0.998917	0.238468	isTarget1
NTRK3	HNSC	Cancer genes	2.02325e-11	0.841491	isTarget1
NTRK3	LUAD	Cancer genes	1.38675	0.114884	isTarget1
NUDT7	BLCA	Random genes	0.442884	0.481531	isTarget1
NUDT7	LUAD	Random genes	2.2047	0.0840408	isTarget1
NUPL1	BLCA	Random genes	0.106541	0.77113	isTarget1
NUPL1	COREAD	Random genes	-0.187608	0.671648	isTarget1
NUPL1	HNSC	Random genes	0.2764	0.831321	isTarget1
NUPL1	LUAD	Random genes	0.510247	0.416812	isTarget1
NUTM1	BLCA	Cancer genes	1.02352	0.053967	isTarget1
NUTM1	COREAD	Cancer genes	0.302556	0.524621	isTarget1
NUTM1	HNSC	Cancer genes	1.01234	0.0734337	isTarget1
NUTM1	LUAD	Cancer genes	0.310502	0.501662	isTarget1
OFCC1	BLCA	Random genes	-2.42079	0.176965	isTarget1
OFCC1	COREAD	Random genes	-0.953383	0.36629	isTarget1
OFCC1	LUAD	Random genes	-2.38864	0.18201	isTarget1
OLFM2	BLCA	Random genes	0.467371	0.51525	isTarget1
OLFM2	COREAD	Random genes	-0.526327	0.423749	isTarget1
OLFM2	HNSC	Random genes	0.24909	0.665891	isTarget1
OLFM2	LUAD	Random genes	0.328998	0.428953	isTarget1
OR10K2	BLCA	Random genes	-0.716859	0.361495	isTarget1
OR10K2	COREAD	Random genes	-9.4376e-11	0.844237	isTarget1
OR10K2	HNSC	Random genes	-2.19146e-12	0.826591	isTarget1
OR10K2	LUAD	Random genes	0.362222	0.304466	isTarget1
OR1A2	BLCA	Random genes	6.40685e-16	1	isTarget1
OR1A2	COREAD	Random genes	-4.80514e-16	0.853143	isTarget1
OR1A2	HNSC	Random genes	9.61028e-16	0.932368	isTarget1
OR1A2	LUAD	Random genes	1.28137e-15	0.765568	isTarget1
OR1I1	BLCA	Random genes	-0.84502	0.385837	isTarget1
OR1I1	COREAD	Random genes	-0.347281	0.527295	isTarget1
OR1I1	HNSC	Random genes	6.98988e-13	0.886233	isTarget1
OR1I1	LUAD	Random genes	-0.724403	0.31689	isTarget1
OR2AE1	BLCA	Random genes	-0.834775	0.394482	isTarget1
OR2AE1	COREAD	Random genes	1.10098	0.1942	isTarget1
OR2AE1	HNSC	Random genes	-2.53415e-11	0.676979	isTarget1
OR2AE1	LUAD	Random genes	0.817111	0.278755	isTarget1
OR4C5	COREAD	Random genes	-0.580278	0.538766	isTarget1
OR4C5	HNSC	Random genes	-1.65276	0.203578	isTarget1
OR4C5	LUAD	Random genes	-1.83872	0.0310195	isTarget1
OR56B1	COREAD	Random genes	3.20343e-16	0.686946	isTarget1
OR5H1	BLCA	Random genes	0.46427	0.438924	isTarget1
OR5H1	COREAD	Random genes	6.66217e-12	1	isTarget1
OR5H1	HNSC	Random genes	0.447747	0.527295	isTarget1
OR5H1	LUAD	Random genes	1.4921e-10	1	isTarget1
OR6A2	BLCA	Random genes	1.81852e-10	0.906051	isTarget1
OR6A2	COREAD	Random genes	0.249179	0.677915	isTarget1
OR6A2	HNSC	Random genes	0.422286	0.433301	isTarget1
OR6A2	LUAD	Random genes	0.0942463	0.932368	isTarget1
OR8J3	BLCA	Random genes	0.313771	0.505996	isTarget1
OR8J3	COREAD	Random genes	0.980812	0.0385938	isTarget1
OR8J3	HNSC	Random genes	2.06941e-13	0.909229	isTarget1
OR8J3	LUAD	Random genes	0.371118	0.212887	isTarget1
ORC1	BLCA	Random genes	-1.02249	0.203578	isTarget1
ORC1	COREAD	Random genes	0.237371	0.589731	isTarget1
ORC1	HNSC	Random genes	-0.254032	0.659935	isTarget1
ORC1	LUAD	Random genes	0.310636	0.591851	isTarget1
PAFAH1B2	BLCA	Cancer genes	-8.84096e-11	0.815553	isTarget1
PAFAH1B2	COREAD	Cancer genes	-0.478119	0.624387	isTarget1
PAFAH1B2	HNSC	Cancer genes	-0.799877	0.464347	isTarget1
PAFAH1B2	LUAD	Cancer genes	-0.350029	0.580686	isTarget1
PAK4	BLCA	Random genes	-0.964205	0.287493	isTarget1
PAK4	COREAD	Random genes	0.621959	0.43663	isTarget1
PAK4	HNSC	Random genes	0.270952	0.604532	isTarget1
PAK4	LUAD	Random genes	0.345424	0.481254	isTarget1
PALB2	BLCA	Cancer genes	-1.60171e-16	0.727851	isTarget1
PALB2	COREAD	Cancer genes	3.20343e-16	0.748773	isTarget1
PALB2	HNSC	Cancer genes	0.879565	0.623302	isTarget1
PALB2	LUAD	Cancer genes	0.812386	0.711047	isTarget1
PAX3	BLCA	Cancer genes	1.77001	0.253889	isTarget1
PAX3	COREAD	Cancer genes	3.95907	0.0715533	isTarget1
PAX3	LUAD	Cancer genes	2.603	0.151166	isTarget1
PBRM1	BLCA	Cancer genes	0.899767	0.0461633	isTarget1
PBRM1	COREAD	Cancer genes	0.652521	0.223175	isTarget1
PBRM1	HNSC	Cancer genes	0.542998	0.297086	isTarget1
PBRM1	LUAD	Cancer genes	0.219437	0.679535	isTarget1
PCBP1	BLCA	Cancer genes	1.86421	0.0127573	isTarget1
PCBP1	COREAD	Cancer genes	4.27477	0	isTarget1
PCBP1	HNSC	Cancer genes	-1.73269e-09	0.87014	isTarget1
PCBP1	LUAD	Cancer genes	-2.05736e-10	1	isTarget1
PCBP4	BLCA	Random genes	-0.280491	0.65045	isTarget1
PCBP4	COREAD	Random genes	0.288977	0.730955	isTarget1
PCBP4	HNSC	Random genes	-0.355208	0.699148	isTarget1
PCBP4	LUAD	Random genes	-1.16903	0.280186	isTarget1
PCCA	BLCA	Cancer genes	-0.513728	0.4628	isTarget1
PCCA	COREAD	Cancer genes	1.17087	0.067969	isTarget1
PCCA	HNSC	Cancer genes	0.462646	0.411735	isTarget1
PCCA	LUAD	Cancer genes	1.06099e-10	0.676979	isTarget1
PCDHA1	BLCA	Random genes	0.390231	0.354483	isTarget1
PCDHA1	COREAD	Random genes	-3.56525e-12	1	isTarget1
PCDHA1	HNSC	Random genes	0.220795	0.509808	isTarget1
PCDHA1	LUAD	Random genes	1.53764e-14	0.936045	isTarget1
PCDHA13	BLCA	Random genes	-0.456055	0.326081	isTarget1
PCDHA13	COREAD	Random genes	-0.0864421	0.693639	isTarget1
PCDHA13	HNSC	Random genes	0.328629	0.356939	isTarget1
PCDHA13	LUAD	Random genes	-0.917769	0.0205998	isTarget1
PDCD1LG2	BLCA	Cancer genes	0.60284	0.438311	isTarget1
PDCD1LG2	COREAD	Cancer genes	1.11517	0.253772	isTarget1
PDCD1LG2	HNSC	Cancer genes	-0.833181	0.433301	isTarget1
PDCD1LG2	LUAD	Cancer genes	-0.292087	0.635107	isTarget1
PDGFB	BLCA	Cancer genes	2.13669e-12	0.889169	isTarget1
PDGFB	COREAD	Cancer genes	-4.84614e-12	1	isTarget1
PDGFB	HNSC	Cancer genes	-0.471182	0.497961	isTarget1
PDGFB	LUAD	Cancer genes	-1.17909	0.255868	isTarget1
PDGFRA	BLCA	Cancer genes	1.3828e-10	1	isTarget1
PDGFRA	COREAD	Cancer genes	0.630409	0.274276	isTarget1
PDGFRA	HNSC	Cancer genes	-9.65687e-10	1	isTarget1
PDGFRA	LUAD	Cancer genes	1.11329	0.0129851	isTarget1
PDYN	BLCA	Random genes	0.908186	0.335572	isTarget1
PDYN	COREAD	Random genes	1.77362	0.019017	isTarget1
PDYN	HNSC	Random genes	0.466807	0.45999	isTarget1
PDYN	LUAD	Random genes	3.95416e-10	0.909229	isTarget1
PDZD8	BLCA	Random genes	0.641794	0.471363	isTarget1
PDZD8	COREAD	Random genes	-0.218454	0.861659	isTarget1
PDZD8	HNSC	Random genes	0.723606	0.281493	isTarget1
PDZD8	LUAD	Random genes	1.65518e-09	0.861659	isTarget1
PEAK1	BLCA	Random genes	0.340812	0.421531	isTarget1
PEAK1	COREAD	Random genes	-0.655672	0.259518	isTarget1
PEAK1	HNSC	Random genes	1.38248	0.103739	isTarget1
PEAK1	LUAD	Random genes	0.672986	0.206918	isTarget1
PEAR1	BLCA	Random genes	-0.932908	0.25072	isTarget1
PEAR1	COREAD	Random genes	0.611	0.303489	isTarget1
PEAR1	HNSC	Random genes	-0.241283	0.662132	isTarget1
PEAR1	LUAD	Random genes	0.0321808	0.864226	isTarget1
PEX5	BLCA	Random genes	-0.747399	0.298313	isTarget1
PEX5	COREAD	Random genes	-9.37403e-12	0.79477	isTarget1
PEX5	HNSC	Random genes	-1.22796	0.240148	isTarget1
PEX5	LUAD	Random genes	-1.54095	0.169927	isTarget1
PFAS	BLCA	Random genes	-4.58505e-11	0.769426	isTarget1
PFAS	COREAD	Random genes	-0.185433	0.70694	isTarget1
PFAS	HNSC	Random genes	0.680318	0.21476	isTarget1
PFAS	LUAD	Random genes	-3.30244e-11	0.853143	isTarget1
PGF	BLCA	Random genes	0.506865	0.664214	isTarget1
PGF	COREAD	Random genes	-0.481113	0.633369	isTarget1
PGF	HNSC	Random genes	-0.482862	0.686946	isTarget1
PGF	LUAD	Random genes	0.73382	0.386586	isTarget1
PGLYRP3	BLCA	Random genes	0.384227	0.695004	isTarget1
PGLYRP3	COREAD	Random genes	-0.959095	0.242085	isTarget1
PGLYRP3	HNSC	Random genes	-0.492944	0.486597	isTarget1
PGLYRP3	LUAD	Random genes	0.091707	0.824042	isTarget1
PGRMC2	BLCA	Random genes	0.530964	0.630095	isTarget1
PGRMC2	COREAD	Random genes	-2.42574e-10	0.735086	isTarget1
PGRMC2	HNSC	Random genes	-0.566266	0.824042	isTarget1
PGRMC2	LUAD	Random genes	-1.41089	0.35503	isTarget1
PHF6	BLCA	Cancer genes	1.49173	0.169673	isTarget1
PHF6	COREAD	Cancer genes	-4.04282e-10	0.78161	isTarget1
PHF6	HNSC	Cancer genes	-0.378388	0.647048	isTarget1
PHF6	LUAD	Cancer genes	0.205491	0.64368	isTarget1
PHOX2B	COREAD	Cancer genes	0.407031	0.504975	isTarget1
PHOX2B	LUAD	Cancer genes	-0.563321	0.478277	isTarget1
PIK3CA	BLCA	Cancer genes	3.21968	0	isTarget1
PIK3CA	COREAD	Cancer genes	4.28165	0	isTarget1
PIK3CA	HNSC	Cancer genes	3.51595	0	isTarget1
PIK3CA	LUAD	Cancer genes	1.35391	6.08042e-05	isTarget1
PIK3CB	BLCA	Cancer genes	0.159913	1	isTarget1
PIK3CB	COREAD	Cancer genes	0.508008	0.460458	isTarget1
PIK3CB	HNSC	Cancer genes	0.459516	0.419202	isTarget1
PIK3CB	LUAD	Cancer genes	0.667877	0.253599	isTarget1
PIK3R1	BLCA	Cancer genes	3.72677e-10	0.943432	isTarget1
PIK3R1	COREAD	Cancer genes	1.6434	0.0236413	isTarget1
PIK3R1	HNSC	Cancer genes	1.08489	0.207504	isTarget1
PIK3R1	LUAD	Cancer genes	-0.873344	0.213115	isTarget1
PIM1	BLCA	Cancer genes	-3.61546	0.00145007	isTarget1
PLA2G3	BLCA	Random genes	0.250605	0.680758	isTarget1
PLA2G3	COREAD	Random genes	-0.356914	0.59516	isTarget1
PLA2G3	HNSC	Random genes	8.03618e-11	0.883318	isTarget1
PLA2G3	LUAD	Random genes	0.543439	0.322729	isTarget1
PLAG1	BLCA	Cancer genes	-0.363742	0.581312	isTarget1
PLAG1	COREAD	Cancer genes	2.40703	0.0232068	isTarget1
PLAG1	HNSC	Cancer genes	-1.11255e-12	0.915253	isTarget1
PLAG1	LUAD	Cancer genes	0.704402	0.371949	isTarget1
PLAU	BLCA	Random genes	-0.635961	0.479775	isTarget1
PLAU	COREAD	Random genes	-0.475222	0.503307	isTarget1
PLAU	HNSC	Random genes	0.697319	0.468137	isTarget1
PLAU	LUAD	Random genes	3.38026e-12	0.921925	isTarget1
PLBD2	BLCA	Random genes	-0.522489	0.489022	isTarget1
PLBD2	COREAD	Random genes	0.543657	0.301538	isTarget1
PLBD2	HNSC	Random genes	0.84782	0.287788	isTarget1
PLBD2	LUAD	Random genes	-8.8075e-12	0.943432	isTarget1
PLCG1	BLCA	Cancer genes	0.575218	0.274567	isTarget1
PLCG1	COREAD	Cancer genes	0.65523	0.222787	isTarget1
PLCG1	HNSC	Cancer genes	3.05998e-11	0.721814	isTarget1
PLCG1	LUAD	Cancer genes	0.136052	0.541052	isTarget1
PMAIP1	LUAD	Random genes	-1.43685	0.377372	isTarget1
PMS2	BLCA	Cancer genes	-0.144001	0.655392	isTarget1
PMS2	COREAD	Cancer genes	0.173732	0.853143	isTarget1
PMS2	HNSC	Cancer genes	-0.237815	0.503307	isTarget1
PMS2	LUAD	Cancer genes	0.127136	0.949852	isTarget1
POLD1	BLCA	Cancer genes	-0.143088	0.716145	isTarget1
POLD1	COREAD	Cancer genes	-0.552537	0.367326	isTarget1
POLD1	HNSC	Cancer genes	-0.327691	0.498926	isTarget1
POLD1	LUAD	Cancer genes	-6.54401e-10	1	isTarget1
POLG	BLCA	Cancer genes	-0.474515	0.599008	isTarget1
POLG	COREAD	Cancer genes	1.37598	0.243501	isTarget1
POLG	HNSC	Cancer genes	0.55725	0.555432	isTarget1
POLG	LUAD	Cancer genes	0.291191	0.721814	isTarget1
POLR2A	BLCA	Cancer genes	3.46931e-13	0.828551	isTarget1
POLR2A	COREAD	Cancer genes	3.25084e-12	0.779141	isTarget1
POLR2A	HNSC	Cancer genes	0.574142	0.513954	isTarget1
POLR2A	LUAD	Cancer genes	0.398968	0.519705	isTarget1
POT1	BLCA	Cancer genes	0.672752	0.239813	isTarget1
POT1	COREAD	Cancer genes	-0.150271	0.659935	isTarget1
POT1	HNSC	Cancer genes	0.348144	0.508143	isTarget1
POT1	LUAD	Cancer genes	0.24701	0.513954	isTarget1
POU2AF1	BLCA	Cancer genes	3.64889e-11	0.953729	isTarget1
POU2AF1	COREAD	Cancer genes	0.870218	0.291394	isTarget1
POU2AF1	HNSC	Cancer genes	-0.794437	0.503307	isTarget1
POU2AF1	LUAD	Cancer genes	0.607372	0.373792	isTarget1
POU3F2	BLCA	Random genes	1.2643e-09	1	isTarget1
POU3F2	COREAD	Random genes	1.29949e-10	0.949852	isTarget1
POU3F2	HNSC	Random genes	-1.16817e-10	0.759134	isTarget1
POU3F2	LUAD	Random genes	0.210146	0.551864	isTarget1
POU4F1	BLCA	Random genes	0.273123	0.836439	isTarget1
POU4F1	COREAD	Random genes	-1.9475	0.013231	isTarget1
POU4F1	HNSC	Random genes	-0.290956	0.658628	isTarget1
POU4F1	LUAD	Random genes	-1.60217	0.0212104	isTarget1
POU5F1	BLCA	Cancer genes	-1.32234	0.380822	isTarget1
POU5F1	COREAD	Cancer genes	-1.08531	0.382439	isTarget1
POU5F1	HNSC	Cancer genes	-0.77256	0.542245	isTarget1
POU5F1	LUAD	Cancer genes	7.24935e-13	0.800419	isTarget1
PPARG	BLCA	Cancer genes	0.556045	0.44781	isTarget1
PPARG	LUAD	Cancer genes	0.795295	0.434889	isTarget1
PPM1D	BLCA	Cancer genes	0.268139	0.565462	isTarget1
PPM1D	COREAD	Cancer genes	-0.761965	0.375614	isTarget1
PPM1D	HNSC	Cancer genes	0.270754	0.603528	isTarget1
PPM1D	LUAD	Cancer genes	-2.98778e-10	0.953729	isTarget1
PPP1CC	BLCA	Random genes	-0.376392	0.632533	isTarget1
PPP1CC	COREAD	Random genes	-0.503978	0.612973	isTarget1
[truncated: 1,078 more rows]

## Sheet: Fig.1c
HGNC	Cohort	isTarget	MutRate	deFactoCancerPair
A1CF	BLCA	neighboring genes	7.28211e-06	De-facto noncognate
A1CF	BLCA	central gene	5.9442e-06	De-facto noncognate
A1CF	COREAD	neighboring genes	3.14337e-06	De-facto noncognate
A1CF	COREAD	central gene	3.90987e-06	De-facto noncognate
A1CF	HNSC	neighboring genes	5.29435e-06	De-facto noncognate
A1CF	HNSC	central gene	6.48245e-06	De-facto noncognate
A1CF	LUAD	neighboring genes	1.46683e-05	De-facto noncognate
A1CF	LUAD	central gene	6.05549e-06	De-facto noncognate
ACVR1	BLCA	neighboring genes	1.46243e-05	De-facto noncognate
ACVR1	BLCA	central gene	7.79962e-06	De-facto noncognate
ACVR1	LUAD	neighboring genes	8.12623e-06	De-facto noncognate
ACVR1	LUAD	central gene	5.57227e-06	De-facto noncognate
ACVR1B	BLCA	neighboring genes	4.6075e-06	De-facto noncognate
ACVR1B	BLCA	central gene	5.90273e-06	De-facto noncognate
ACVR2A	BLCA	neighboring genes	6.1501e-06	De-facto noncognate
ACVR2A	BLCA	central gene	1.38212e-06	De-facto noncognate
ACVR2A	HNSC	neighboring genes	4.0242e-06	De-facto noncognate
ACVR2A	HNSC	central gene	0	De-facto noncognate
ACVR2A	LUAD	neighboring genes	6.3222e-06	De-facto noncognate
ACVR2A	LUAD	central gene	3.84e-06	De-facto noncognate
AJUBA	COREAD	neighboring genes	3.30406e-06	De-facto noncognate
AJUBA	COREAD	central gene	0	De-facto noncognate
AJUBA	HNSC	neighboring genes	3.71609e-06	De-facto cognate
AJUBA	HNSC	central gene	1.86434e-05	De-facto cognate
AJUBA	LUAD	neighboring genes	7.54118e-06	De-facto noncognate
AJUBA	LUAD	central gene	3.09762e-06	De-facto noncognate
AKT1	BLCA	neighboring genes	4.02845e-06	De-facto noncognate
AKT1	BLCA	central gene	2.58234e-06	De-facto noncognate
AKT1	COREAD	neighboring genes	1.98732e-06	De-facto noncognate
AKT1	COREAD	central gene	2.54785e-06	De-facto noncognate
AKT1	HNSC	neighboring genes	2.70352e-06	De-facto noncognate
AKT1	HNSC	central gene	1.87745e-06	De-facto noncognate
AKT1	LUAD	neighboring genes	3.70209e-06	De-facto noncognate
AKT1	LUAD	central gene	2.86984e-06	De-facto noncognate
AKT2	BLCA	neighboring genes	6.42995e-06	De-facto noncognate
AKT2	BLCA	central gene	4.80068e-06	De-facto noncognate
AKT2	COREAD	neighboring genes	2.20867e-06	De-facto noncognate
AKT2	COREAD	central gene	5.92069e-07	De-facto noncognate
AKT2	HNSC	neighboring genes	2.66636e-06	De-facto noncognate
AKT2	HNSC	central gene	3.49026e-06	De-facto noncognate
AKT3	BLCA	neighboring genes	7.23737e-06	De-facto noncognate
AKT3	BLCA	central gene	8.29093e-06	De-facto noncognate
AKT3	HNSC	neighboring genes	5.65158e-06	De-facto noncognate
AKT3	HNSC	central gene	6.02779e-06	De-facto noncognate
AMER1	COREAD	neighboring genes	3.32059e-06	De-facto cognate
AMER1	COREAD	central gene	1.8363e-05	De-facto cognate
AMER1	HNSC	neighboring genes	5.70935e-06	De-facto noncognate
AMER1	HNSC	central gene	6.27537e-06	De-facto noncognate
ANAPC1	BLCA	neighboring genes	6.25972e-06	De-facto noncognate
ANAPC1	BLCA	central gene	6.13338e-06	De-facto noncognate
ANAPC1	COREAD	neighboring genes	2.2234e-06	De-facto noncognate
ANAPC1	COREAD	central gene	1.51286e-06	De-facto noncognate
ANAPC1	HNSC	neighboring genes	3.0947e-06	De-facto noncognate
ANAPC1	HNSC	central gene	3.34438e-06	De-facto noncognate
ANAPC1	LUAD	neighboring genes	3.75659e-06	De-facto noncognate
ANAPC1	LUAD	central gene	2.72649e-06	De-facto noncognate
APC	BLCA	neighboring genes	6.38016e-06	De-facto noncognate
APC	BLCA	central gene	6.8236e-06	De-facto noncognate
APC	COREAD	neighboring genes	5.24578e-07	De-facto cognate
APC	COREAD	central gene	8.17362e-05	De-facto cognate
APC	LUAD	neighboring genes	2.95437e-07	De-facto cognate
APC	LUAD	central gene	5.332e-06	De-facto cognate
AR	BLCA	neighboring genes	4.90504e-06	De-facto noncognate
AR	BLCA	central gene	5.86533e-06	De-facto noncognate
AR	HNSC	neighboring genes	4.27936e-06	De-facto noncognate
AR	HNSC	central gene	5.33037e-06	De-facto noncognate
AR	LUAD	neighboring genes	9.81204e-06	De-facto noncognate
AR	LUAD	central gene	8.96271e-06	De-facto noncognate
ARAF	BLCA	neighboring genes	5.00111e-06	De-facto noncognate
ARAF	BLCA	central gene	9.58097e-07	De-facto noncognate
ARAF	LUAD	neighboring genes	7.18694e-06	De-facto noncognate
ARAF	LUAD	central gene	4.25906e-06	De-facto noncognate
ARHGAP35	BLCA	neighboring genes	5.41727e-06	De-facto cognate
ARHGAP35	BLCA	central gene	1.34253e-05	De-facto cognate
ARHGAP35	HNSC	neighboring genes	4.60609e-06	De-facto noncognate
ARHGAP35	HNSC	central gene	5.66748e-06	De-facto noncognate
ARHGAP35	LUAD	neighboring genes	2.90816e-06	De-facto cognate
ARHGAP35	LUAD	central gene	7.21935e-06	De-facto cognate
ARHGEF10	BLCA	neighboring genes	4.0224e-06	De-facto noncognate
ARHGEF10	BLCA	central gene	2.87979e-06	De-facto noncognate
ARID1A	BLCA	neighboring genes	5.97587e-06	De-facto cognate
ARID1A	BLCA	central gene	3.11656e-05	De-facto cognate
ARID1A	COREAD	neighboring genes	1.55824e-06	De-facto cognate
ARID1A	COREAD	central gene	5.17147e-06	De-facto cognate
ARID1A	HNSC	neighboring genes	2.91713e-06	De-facto cognate
ARID1A	HNSC	central gene	5.35563e-06	De-facto cognate
ARID1A	LUAD	neighboring genes	3.27316e-06	De-facto cognate
ARID1A	LUAD	central gene	7.08451e-06	De-facto cognate
ARID1B	HNSC	neighboring genes	2.2243e-06	De-facto noncognate
ARID1B	HNSC	central gene	3.4215e-06	De-facto noncognate
ARID1B	LUAD	neighboring genes	5.95005e-06	De-facto noncognate
ARID1B	LUAD	central gene	5.81118e-06	De-facto noncognate
ARID2	BLCA	neighboring genes	6.46715e-06	De-facto noncognate
ARID2	BLCA	central gene	5.65848e-06	De-facto noncognate
ARID2	COREAD	neighboring genes	2.71774e-06	De-facto noncognate
ARID2	COREAD	central gene	2.79145e-06	De-facto noncognate
ARID2	HNSC	neighboring genes	2.08971e-06	De-facto noncognate
ARID2	HNSC	central gene	3.08543e-06	De-facto noncognate
ARID2	LUAD	neighboring genes	3.59358e-06	De-facto noncognate
ARID2	LUAD	central gene	4.71634e-06	De-facto noncognate
ARID5B	BLCA	neighboring genes	5.59418e-06	De-facto noncognate
ARID5B	BLCA	central gene	6.4272e-06	De-facto noncognate
ARID5B	COREAD	neighboring genes	3.67964e-06	De-facto noncognate
ARID5B	COREAD	central gene	3.17068e-06	De-facto noncognate
ARID5B	HNSC	neighboring genes	3.3893e-06	De-facto noncognate
ARID5B	HNSC	central gene	5.39168e-06	De-facto noncognate
ASXL1	BLCA	neighboring genes	8.25774e-06	De-facto cognate
ASXL1	BLCA	central gene	1.18829e-05	De-facto cognate
ASXL1	COREAD	neighboring genes	2.76431e-06	De-facto cognate
ASXL1	COREAD	central gene	3.4038e-06	De-facto cognate
ASXL1	HNSC	neighboring genes	3.43066e-06	De-facto noncognate
ASXL1	HNSC	central gene	3.90161e-06	De-facto noncognate
ASXL1	LUAD	neighboring genes	4.2608e-06	De-facto noncognate
ASXL1	LUAD	central gene	4.89896e-06	De-facto noncognate
ATM	BLCA	neighboring genes	6.7743e-06	De-facto cognate
ATM	BLCA	central gene	1.22208e-05	De-facto cognate
ATM	COREAD	neighboring genes	1.99342e-06	De-facto cognate
ATM	COREAD	central gene	6.594e-06	De-facto cognate
ATM	HNSC	neighboring genes	2.8514e-06	De-facto noncognate
ATM	HNSC	central gene	2.63772e-06	De-facto noncognate
ATM	LUAD	neighboring genes	4.02841e-06	De-facto cognate
ATM	LUAD	central gene	7.00292e-06	De-facto cognate
ATRX	BLCA	neighboring genes	4.28144e-06	De-facto noncognate
ATRX	BLCA	central gene	6.06431e-06	De-facto noncognate
ATRX	COREAD	neighboring genes	3.80183e-06	De-facto noncognate
ATRX	COREAD	central gene	4.1623e-06	De-facto noncognate
ATRX	LUAD	neighboring genes	6.5424e-06	De-facto noncognate
ATRX	LUAD	central gene	7.179e-06	De-facto noncognate
AXIN1	COREAD	neighboring genes	2.15407e-06	De-facto noncognate
AXIN1	COREAD	central gene	3.28049e-06	De-facto noncognate
AXIN1	HNSC	neighboring genes	2.30878e-06	De-facto cognate
AXIN1	HNSC	central gene	8.59491e-06	De-facto cognate
B2M	LUAD	neighboring genes	3.96748e-06	De-facto cognate
B2M	LUAD	central gene	2.57843e-05	De-facto cognate
BAP1	COREAD	neighboring genes	2.1135e-06	De-facto noncognate
BAP1	COREAD	central gene	1.0119e-05	De-facto noncognate
BAP1	HNSC	neighboring genes	2.45289e-06	De-facto noncognate
BAP1	HNSC	central gene	7.45645e-06	De-facto noncognate
BAP1	LUAD	neighboring genes	3.03527e-06	De-facto noncognate
BAP1	LUAD	central gene	0	De-facto noncognate
BARD1	BLCA	neighboring genes	1.05972e-05	De-facto noncognate
BARD1	BLCA	central gene	1.19067e-05	De-facto noncognate
BARD1	COREAD	neighboring genes	3.48521e-06	De-facto noncognate
BARD1	COREAD	central gene	3.13271e-06	De-facto noncognate
BARD1	HNSC	neighboring genes	6.84846e-06	De-facto noncognate
BARD1	HNSC	central gene	3.46263e-06	De-facto noncognate
BAX	BLCA	neighboring genes	6.38152e-06	De-facto noncognate
BAX	BLCA	central gene	2.82481e-06	De-facto noncognate
BAX	COREAD	neighboring genes	2.33754e-06	De-facto noncognate
BAX	COREAD	central gene	2.78708e-06	De-facto noncognate
BAX	HNSC	neighboring genes	2.83376e-06	De-facto noncognate
BAX	HNSC	central gene	0	De-facto noncognate
BCL2	BLCA	neighboring genes	5.02334e-06	De-facto noncognate
BCL2	BLCA	central gene	5.52004e-06	De-facto noncognate
BCL2	COREAD	neighboring genes	1.53408e-06	De-facto noncognate
BCL2	COREAD	central gene	0	De-facto noncognate
BCL2	HNSC	neighboring genes	1.73911e-06	De-facto noncognate
BCL2	HNSC	central gene	4.01326e-06	De-facto noncognate
BCLAF1	BLCA	neighboring genes	6.25548e-06	De-facto cognate
BCLAF1	BLCA	central gene	1.7678e-05	De-facto cognate
BCLAF1	HNSC	neighboring genes	2.18975e-06	De-facto cognate
BCLAF1	HNSC	central gene	8.26235e-06	De-facto cognate
BCLAF1	LUAD	neighboring genes	4.63462e-06	De-facto cognate
BCLAF1	LUAD	central gene	1.6138e-05	De-facto cognate
BCOR	BLCA	neighboring genes	4.90171e-06	De-facto noncognate
BCOR	BLCA	central gene	5.34567e-06	De-facto noncognate
BCOR	COREAD	neighboring genes	2.41812e-06	De-facto noncognate
BCOR	COREAD	central gene	2.63713e-06	De-facto noncognate
BCOR	HNSC	neighboring genes	2.67278e-06	De-facto noncognate
BCOR	HNSC	central gene	2.59099e-06	De-facto noncognate
BIRC6	HNSC	neighboring genes	4.27213e-06	De-facto noncognate
BIRC6	HNSC	central gene	2.81637e-06	De-facto noncognate
BIRC6	LUAD	neighboring genes	6.16753e-06	De-facto noncognate
BIRC6	LUAD	central gene	4.95083e-06	De-facto noncognate
BLM	COREAD	neighboring genes	1.80298e-06	De-facto noncognate
BLM	COREAD	central gene	1.48624e-06	De-facto noncognate
BLM	HNSC	neighboring genes	2.58334e-06	De-facto noncognate
BLM	HNSC	central gene	2.19036e-06	De-facto noncognate
BRAF	BLCA	neighboring genes	5.75591e-06	De-facto cognate
BRAF	BLCA	central gene	2.20667e-05	De-facto cognate
BRAF	COREAD	neighboring genes	1.32511e-06	De-facto cognate
BRAF	COREAD	central gene	5.87842e-05	De-facto cognate
BRAF	HNSC	neighboring genes	1.95288e-06	De-facto cognate
BRAF	HNSC	central gene	1.39041e-05	De-facto cognate
BRAF	LUAD	neighboring genes	3.83804e-06	De-facto cognate
BRAF	LUAD	central gene	6.21261e-05	De-facto cognate
BRCA1	COREAD	neighboring genes	1.96798e-06	De-facto noncognate
BRCA1	COREAD	central gene	1.9241e-06	De-facto noncognate
BRCA2	BLCA	neighboring genes	6.89922e-06	De-facto cognate
BRCA2	BLCA	central gene	1.03043e-05	De-facto cognate
BRCA2	HNSC	neighboring genes	2.90398e-06	De-facto noncognate
BRCA2	HNSC	central gene	3.15434e-06	De-facto noncognate
BRD7	COREAD	neighboring genes	2.8512e-06	De-facto noncognate
BRD7	COREAD	central gene	2.9739e-06	De-facto noncognate
BRD7	HNSC	neighboring genes	3.72175e-06	De-facto noncognate
BRD7	HNSC	central gene	1.25223e-06	De-facto noncognate
BRD7	LUAD	neighboring genes	3.76209e-06	De-facto noncognate
BRD7	LUAD	central gene	2.39267e-06	De-facto noncognate
BRIP1	COREAD	neighboring genes	1.8409e-06	De-facto noncognate
BRIP1	COREAD	central gene	2.85255e-06	De-facto noncognate
BRIP1	LUAD	neighboring genes	4.44334e-06	De-facto noncognate
BRIP1	LUAD	central gene	5.8906e-06	De-facto noncognate
BTG2	COREAD	neighboring genes	7.76652e-06	De-facto noncognate
BTG2	COREAD	central gene	0	De-facto noncognate
BTG2	HNSC	neighboring genes	8.28844e-06	De-facto noncognate
BTG2	HNSC	central gene	5.28103e-06	De-facto noncognate
BTG2	LUAD	neighboring genes	1.35746e-05	De-facto noncognate
BTG2	LUAD	central gene	6.05438e-06	De-facto noncognate
BUB1B	BLCA	neighboring genes	5.79204e-06	De-facto noncognate
BUB1B	BLCA	central gene	7.9169e-06	De-facto noncognate
BUB1B	COREAD	neighboring genes	1.35602e-06	De-facto noncognate
BUB1B	COREAD	central gene	5.5794e-07	De-facto noncognate
BUB1B	HNSC	neighboring genes	3.35453e-06	De-facto noncognate
BUB1B	HNSC	central gene	3.28906e-06	De-facto noncognate
CACNA1D	COREAD	neighboring genes	1.90947e-06	De-facto noncognate
CACNA1D	COREAD	central gene	2.07267e-06	De-facto noncognate
CAMTA1	HNSC	neighboring genes	2.18359e-06	De-facto noncognate
CAMTA1	HNSC	central gene	0	De-facto noncognate
CAMTA1	LUAD	neighboring genes	1.48347e-06	De-facto noncognate
CAMTA1	LUAD	central gene	0	De-facto noncognate
CARD11	BLCA	neighboring genes	5.12094e-06	De-facto noncognate
CARD11	BLCA	central gene	8.97774e-06	De-facto noncognate
CARD11	COREAD	neighboring genes	7.65536e-06	De-facto noncognate
CARD11	COREAD	central gene	8.33678e-06	De-facto noncognate
CARS	BLCA	neighboring genes	4.2957e-06	De-facto noncognate
CARS	BLCA	central gene	5.73553e-06	De-facto noncognate
CARS	COREAD	neighboring genes	3.17874e-06	De-facto noncognate
CARS	COREAD	central gene	1.61684e-06	De-facto noncognate
CARS	HNSC	neighboring genes	2.81081e-06	De-facto noncognate
CARS	HNSC	central gene	2.38282e-06	De-facto noncognate
CARS	LUAD	neighboring genes	3.58047e-06	De-facto noncognate
CARS	LUAD	central gene	1.36588e-06	De-facto noncognate
CASP3	BLCA	neighboring genes	5.94746e-06	De-facto noncognate
CASP3	BLCA	central gene	4.57555e-06	De-facto noncognate
CASP3	COREAD	neighboring genes	1.95601e-06	De-facto noncognate
CASP3	COREAD	central gene	2.25722e-06	De-facto noncognate
CASP3	HNSC	neighboring genes	3.12289e-06	De-facto noncognate
CASP3	HNSC	central gene	3.32658e-06	De-facto noncognate
CASP3	LUAD	neighboring genes	4.95721e-06	De-facto noncognate
CASP3	LUAD	central gene	6.3562e-06	De-facto noncognate
CASP8	BLCA	neighboring genes	4.96489e-06	De-facto cognate
CASP8	BLCA	central gene	2.03884e-05	De-facto cognate
CASP8	COREAD	neighboring genes	1.69566e-06	De-facto cognate
CASP8	COREAD	central gene	6.03482e-06	De-facto cognate
CASP8	HNSC	neighboring genes	2.03621e-06	De-facto cognate
CASP8	HNSC	central gene	6.32451e-05	De-facto cognate
CASP9	BLCA	neighboring genes	2.84475e-06	De-facto noncognate
CASP9	BLCA	central gene	4.224e-06	De-facto noncognate
CASP9	COREAD	neighboring genes	6.10163e-07	De-facto noncognate
CASP9	COREAD	central gene	6.94596e-07	De-facto noncognate
CASP9	HNSC	neighboring genes	1.25892e-06	De-facto noncognate
CASP9	HNSC	central gene	1.02366e-06	De-facto noncognate
CASP9	LUAD	neighboring genes	1.512e-06	De-facto cognate
CASP9	LUAD	central gene	3.91189e-06	De-facto cognate
CBFB	BLCA	neighboring genes	5.13514e-06	De-facto noncognate
CBFB	BLCA	central gene	8.67814e-06	De-facto noncognate
CBFB	COREAD	neighboring genes	2.02662e-06	De-facto noncognate
CBFB	COREAD	central gene	1.42704e-06	De-facto noncognate
CBFB	HNSC	neighboring genes	3.21847e-06	De-facto noncognate
CBFB	HNSC	central gene	0	De-facto noncognate
CBFB	LUAD	neighboring genes	2.696e-06	De-facto noncognate
CBFB	LUAD	central gene	1.60739e-06	De-facto noncognate
CCNB1IP1	BLCA	neighboring genes	4.60597e-06	De-facto noncognate
CCNB1IP1	BLCA	central gene	2.17476e-06	De-facto noncognate
CCNB1IP1	HNSC	neighboring genes	2.64371e-06	De-facto cognate
CCNB1IP1	HNSC	central gene	1.2649e-05	De-facto cognate
CCND1	COREAD	neighboring genes	1.9291e-06	De-facto noncognate
CCND1	COREAD	central gene	1.89866e-06	De-facto noncognate
CCND1	HNSC	neighboring genes	5.68603e-06	De-facto noncognate
CCND1	HNSC	central gene	9.79355e-06	De-facto noncognate
CCND1	LUAD	neighboring genes	8.90888e-06	De-facto noncognate
CCND1	LUAD	central gene	5.34653e-06	De-facto noncognate
CCND3	COREAD	neighboring genes	3.09662e-06	De-facto noncognate
CCND3	COREAD	central gene	1.01885e-06	De-facto noncognate
CCND3	HNSC	neighboring genes	2.56706e-06	De-facto noncognate
CCND3	HNSC	central gene	0	De-facto noncognate
CCND3	LUAD	neighboring genes	4.14196e-06	De-facto noncognate
CCND3	LUAD	central gene	2.29522e-06	De-facto noncognate
CCR4	BLCA	neighboring genes	6.6403e-06	De-facto noncognate
CCR4	BLCA	central gene	5.49205e-06	De-facto noncognate
CCR4	COREAD	neighboring genes	3.63978e-06	De-facto noncognate
CCR4	COREAD	central gene	3.61246e-06	De-facto noncognate
CCR4	LUAD	neighboring genes	3.68979e-06	De-facto noncognate
CCR4	LUAD	central gene	3.05175e-06	De-facto noncognate
CCR7	BLCA	neighboring genes	6.97079e-06	De-facto noncognate
CCR7	BLCA	central gene	5.50881e-06	De-facto noncognate
CCR7	COREAD	neighboring genes	2.78233e-06	De-facto noncognate
CCR7	COREAD	central gene	3.62349e-06	De-facto noncognate
CCR7	HNSC	neighboring genes	3.08687e-06	De-facto noncognate
CCR7	HNSC	central gene	1.33503e-06	De-facto noncognate
CCR7	LUAD	neighboring genes	4.64812e-06	De-facto noncognate
CCR7	LUAD	central gene	1.02036e-06	De-facto noncognate
CD274	COREAD	neighboring genes	1.72919e-06	De-facto noncognate
CD274	COREAD	central gene	1.79531e-06	De-facto noncognate
CD274	HNSC	neighboring genes	1.72927e-06	De-facto noncognate
CD274	HNSC	central gene	2.64584e-06	De-facto noncognate
CD274	LUAD	neighboring genes	4.45194e-06	De-facto noncognate
CD274	LUAD	central gene	0	De-facto noncognate
CD28	HNSC	neighboring genes	3.95679e-06	De-facto noncognate
CD28	HNSC	central gene	1.86677e-06	De-facto noncognate
CD74	BLCA	neighboring genes	5.379e-06	De-facto noncognate
CD74	BLCA	central gene	0	De-facto noncognate
CD74	COREAD	neighboring genes	2.06389e-06	De-facto noncognate
CD74	COREAD	central gene	2.94371e-06	De-facto noncognate
CD74	HNSC	neighboring genes	2.67957e-06	De-facto noncognate
CD74	HNSC	central gene	4.3383e-06	De-facto noncognate
CD74	LUAD	neighboring genes	6.30997e-06	De-facto noncognate
CD74	LUAD	central gene	0	De-facto noncognate
CD79A	BLCA	neighboring genes	7.49294e-06	De-facto noncognate
CD79A	BLCA	central gene	9.08584e-06	De-facto noncognate
CD79A	HNSC	neighboring genes	3.46339e-06	De-facto noncognate
CD79A	HNSC	central gene	0	De-facto noncognate
CD79A	LUAD	neighboring genes	4.32902e-06	De-facto noncognate
CD79A	LUAD	central gene	3.3658e-06	De-facto noncognate
CD79B	BLCA	neighboring genes	5.64877e-06	De-facto noncognate
CD79B	BLCA	central gene	2.39715e-06	De-facto noncognate
CD79B	HNSC	neighboring genes	5.0342e-06	De-facto noncognate
CD79B	HNSC	central gene	0	De-facto noncognate
CD79B	LUAD	neighboring genes	7.4927e-06	De-facto noncognate
CD79B	LUAD	central gene	9.32412e-06	De-facto noncognate
CDH10	COREAD	neighboring genes	1.34346e-05	De-facto noncognate
CDH10	COREAD	central gene	1.47751e-05	De-facto noncognate
CDH11	COREAD	neighboring genes	7.71184e-06	De-facto noncognate
CDH11	COREAD	central gene	9.17112e-06	De-facto noncognate
CDH11	LUAD	neighboring genes	1.95907e-05	De-facto noncognate
CDH11	LUAD	central gene	1.47574e-05	De-facto noncognate
CDH17	HNSC	neighboring genes	3.96302e-06	De-facto noncognate
CDH17	HNSC	central gene	2.51695e-06	De-facto noncognate
CDK12	BLCA	neighboring genes	1.68988e-05	De-facto noncognate
CDK12	BLCA	central gene	1.17924e-05	De-facto noncognate
CDK12	COREAD	neighboring genes	4.53249e-06	De-facto noncognate
CDK12	COREAD	central gene	2.40722e-06	De-facto noncognate
CDK12	HNSC	neighboring genes	3.45917e-06	De-facto noncognate
CDK12	HNSC	central gene	2.06946e-06	De-facto noncognate
CDK4	BLCA	neighboring genes	5.80403e-06	De-facto noncognate
CDK4	BLCA	central gene	7.35256e-06	De-facto noncognate
CDK4	COREAD	neighboring genes	2.62465e-06	De-facto noncognate
CDK4	COREAD	central gene	3.62718e-06	De-facto noncognate
CDK4	LUAD	neighboring genes	5.33039e-06	De-facto noncognate
CDK4	LUAD	central gene	6.12836e-06	De-facto noncognate
CDKN1A	BLCA	neighboring genes	4.87021e-06	De-facto cognate
CDKN1A	BLCA	central gene	6.68539e-05	De-facto cognate
CDKN1A	COREAD	neighboring genes	2.02323e-06	De-facto noncognate
CDKN1A	COREAD	central gene	3.66449e-06	De-facto noncognate
CDKN1A	HNSC	neighboring genes	2.2363e-06	De-facto noncognate
CDKN1A	HNSC	central gene	0	De-facto noncognate
CDKN1B	COREAD	neighboring genes	2.91072e-06	De-facto noncognate
CDKN1B	COREAD	central gene	1.44323e-06	De-facto noncognate
CDKN1B	HNSC	neighboring genes	4.39182e-06	De-facto noncognate
CDKN1B	HNSC	central gene	4.25393e-06	De-facto noncognate
CDKN2A	BLCA	neighboring genes	8.17229e-06	De-facto cognate
CDKN2A	BLCA	central gene	8.05828e-05	De-facto cognate
CDKN2A	COREAD	neighboring genes	5.5434e-06	De-facto noncognate
CDKN2A	COREAD	central gene	3.97532e-06	De-facto noncognate
CDKN2A	HNSC	neighboring genes	4.45615e-06	De-facto cognate
CDKN2A	HNSC	central gene	0.000193335	De-facto cognate
CDKN2A	LUAD	neighboring genes	3.97344e-06	De-facto cognate
CDKN2A	LUAD	central gene	9.85098e-05	De-facto cognate
CDKN2C	BLCA	neighboring genes	6.26134e-06	De-facto noncognate
CDKN2C	BLCA	central gene	7.95178e-06	De-facto noncognate
CDKN2C	LUAD	neighboring genes	5.46734e-06	De-facto noncognate
CDKN2C	LUAD	central gene	0	De-facto noncognate
CEBPA	COREAD	neighboring genes	3.29073e-06	De-facto noncognate
CEBPA	COREAD	central gene	9.47311e-07	De-facto noncognate
CEBPA	HNSC	neighboring genes	4.46175e-06	De-facto noncognate
CEBPA	HNSC	central gene	0	De-facto noncognate
CEBPA	LUAD	neighboring genes	6.07884e-06	De-facto noncognate
CEBPA	LUAD	central gene	1.06703e-06	De-facto noncognate
CHD2	COREAD	neighboring genes	1.74602e-06	De-facto noncognate
CHD2	COREAD	central gene	2.59944e-06	De-facto noncognate
CHD2	HNSC	neighboring genes	7.71962e-06	De-facto noncognate
CHD2	HNSC	central gene	3.11264e-06	De-facto noncognate
CHD4	BLCA	neighboring genes	5.51826e-06	De-facto cognate
CHD4	BLCA	central gene	1.106e-05	De-facto cognate
CHD4	HNSC	neighboring genes	3.20185e-06	De-facto noncognate
CHD4	HNSC	central gene	2.60149e-06	De-facto noncognate
CHEK2	COREAD	neighboring genes	2.71868e-06	De-facto noncognate
CHEK2	COREAD	central gene	9.97169e-07	De-facto noncognate
CHEK2	HNSC	neighboring genes	2.77384e-06	De-facto noncognate
CHEK2	HNSC	central gene	4.40874e-06	De-facto noncognate
CIC	BLCA	neighboring genes	7.62369e-06	De-facto noncognate
CIC	BLCA	central gene	8.31275e-06	De-facto noncognate
CIC	COREAD	neighboring genes	2.74837e-06	De-facto noncognate
CIC	COREAD	central gene	1.17167e-06	De-facto noncognate
CIC	HNSC	neighboring genes	3.36824e-06	De-facto noncognate
CIC	HNSC	central gene	3.45352e-06	De-facto noncognate
CIC	LUAD	neighboring genes	4.46434e-06	De-facto noncognate
CIC	LUAD	central gene	3.51933e-06	De-facto noncognate
CIITA	BLCA	neighboring genes	4.61061e-06	De-facto noncognate
CIITA	BLCA	central gene	5.1959e-06	De-facto noncognate
CIITA	LUAD	neighboring genes	2.7043e-06	De-facto noncognate
CIITA	LUAD	central gene	2.88719e-06	De-facto noncognate
CLTC	BLCA	neighboring genes	7.86542e-06	De-facto noncognate
CLTC	BLCA	central gene	8.66195e-06	De-facto noncognate
CLTC	COREAD	neighboring genes	2.2007e-06	De-facto noncognate
CLTC	COREAD	central gene	1.42438e-06	De-facto noncognate
CLTC	HNSC	neighboring genes	3.32864e-06	De-facto noncognate
CLTC	HNSC	central gene	2.44904e-06	De-facto noncognate
CLTC	LUAD	neighboring genes	4.30532e-06	De-facto noncognate
CLTC	LUAD	central gene	3.74357e-06	De-facto noncognate
CLTCL1	BLCA	neighboring genes	4.26097e-06	De-facto noncognate
CLTCL1	BLCA	central gene	5.85581e-06	De-facto noncognate
CNBP	BLCA	neighboring genes	6.2327e-06	De-facto noncognate
CNBP	BLCA	central gene	6.52822e-06	De-facto noncognate
CNBP	COREAD	neighboring genes	2.55359e-06	De-facto noncognate
CNBP	COREAD	central gene	1.61026e-06	De-facto noncognate
CNBP	HNSC	neighboring genes	4.07057e-06	De-facto noncognate
CNBP	HNSC	central gene	0	De-facto noncognate
CNBP	LUAD	neighboring genes	4.05031e-06	De-facto noncognate
CNBP	LUAD	central gene	1.81376e-06	De-facto noncognate
CNOT3	COREAD	neighboring genes	2.54058e-06	De-facto noncognate
CNOT3	COREAD	central gene	3.56724e-06	De-facto noncognate
CNOT3	HNSC	neighboring genes	3.74418e-06	De-facto noncognate
CNOT3	HNSC	central gene	3.28577e-06	De-facto noncognate
CNOT3	LUAD	neighboring genes	2.50395e-06	De-facto noncognate
CNOT3	LUAD	central gene	3.01355e-06	De-facto noncognate
CNTNAP2	BLCA	neighboring genes	6.20622e-06	De-facto noncognate
CNTNAP2	BLCA	central gene	0	De-facto noncognate
CNTNAP2	COREAD	neighboring genes	1.0127e-05	De-facto noncognate
CNTNAP2	COREAD	central gene	0	De-facto noncognate
CNTNAP2	HNSC	neighboring genes	9.02426e-06	De-facto noncognate
CNTNAP2	HNSC	central gene	0	De-facto noncognate
CNTNAP2	LUAD	neighboring genes	2.14874e-05	De-facto noncognate
CNTNAP2	LUAD	central gene	0	De-facto noncognate
COL3A1	BLCA	neighboring genes	3.76445e-06	De-facto noncognate
COL3A1	BLCA	central gene	8.00552e-06	De-facto noncognate
COL3A1	COREAD	neighboring genes	4.64271e-06	De-facto noncognate
COL3A1	COREAD	central gene	4.70154e-06	De-facto noncognate
COL3A1	HNSC	neighboring genes	8.21065e-06	De-facto noncognate
COL3A1	HNSC	central gene	5.82029e-06	De-facto noncognate
COL3A1	LUAD	neighboring genes	1.04589e-06	De-facto cognate
COL3A1	LUAD	central gene	1.99119e-05	De-facto cognate
CPEB3	BLCA	neighboring genes	4.84264e-06	De-facto noncognate
CPEB3	BLCA	central gene	4.75515e-06	De-facto noncognate
CPEB3	COREAD	neighboring genes	1.92659e-06	De-facto noncognate
CPEB3	COREAD	central gene	2.34582e-06	De-facto noncognate
CPEB3	LUAD	neighboring genes	3.47212e-06	De-facto noncognate
CPEB3	LUAD	central gene	2.64228e-06	De-facto noncognate
CR1	BLCA	neighboring genes	7.6721e-06	De-facto noncognate
CR1	BLCA	central gene	3.88901e-06	De-facto noncognate
CR1	HNSC	neighboring genes	2.92839e-06	De-facto noncognate
CR1	HNSC	central gene	3.23136e-06	De-facto noncognate
CR1	LUAD	neighboring genes	6.28812e-06	De-facto noncognate
CR1	LUAD	central gene	6.48298e-06	De-facto noncognate
CREB3L1	BLCA	neighboring genes	4.34287e-06	De-facto noncognate
CREB3L1	BLCA	central gene	0	De-facto noncognate
CREB3L1	COREAD	neighboring genes	2.14243e-06	De-facto noncognate
CREB3L1	COREAD	central gene	2.49432e-06	De-facto noncognate
CREB3L1	HNSC	neighboring genes	2.2963e-06	De-facto noncognate
CREB3L1	HNSC	central gene	0	De-facto noncognate
CREB3L1	LUAD	neighboring genes	4.49731e-06	De-facto noncognate
CREB3L1	LUAD	central gene	0	De-facto noncognate
CREB3L2	BLCA	neighboring genes	8.50638e-06	De-facto noncognate
CREB3L2	BLCA	central gene	5.67984e-06	De-facto noncognate
CREB3L2	COREAD	neighboring genes	3.07735e-06	De-facto noncognate
CREB3L2	COREAD	central gene	3.36239e-06	De-facto noncognate
CREB3L2	HNSC	neighboring genes	3.71066e-06	De-facto noncognate
CREB3L2	HNSC	central gene	3.30355e-06	De-facto noncognate
CREB3L2	LUAD	neighboring genes	3.78137e-06	De-facto noncognate
CREB3L2	LUAD	central gene	4.41854e-06	De-facto noncognate
CREBBP	BLCA	neighboring genes	5.27095e-06	De-facto cognate
CREBBP	BLCA	central gene	1.46028e-05	De-facto cognate
CREBBP	COREAD	neighboring genes	2.51902e-06	De-facto noncognate
CREBBP	COREAD	central gene	2.80829e-06	De-facto noncognate
CREBBP	HNSC	neighboring genes	2.27535e-06	De-facto cognate
CREBBP	HNSC	central gene	6.65795e-06	De-facto cognate
CREBBP	LUAD	neighboring genes	2.70007e-06	De-facto cognate
CREBBP	LUAD	central gene	6.46393e-06	De-facto cognate
CRTC1	BLCA	neighboring genes	5.46714e-06	De-facto noncognate
CRTC1	BLCA	central gene	3.83239e-06	De-facto noncognate
CRTC1	COREAD	neighboring genes	2.84484e-06	De-facto noncognate
CRTC1	COREAD	central gene	9.45299e-07	De-facto noncognate
CRTC1	HNSC	neighboring genes	3.48475e-06	De-facto noncognate
CRTC1	HNSC	central gene	0	De-facto noncognate
CRTC1	LUAD	neighboring genes	3.70375e-06	De-facto noncognate
CRTC1	LUAD	central gene	1.06477e-06	De-facto noncognate
CSMD3	BLCA	neighboring genes	1.17747e-05	De-facto noncognate
CSMD3	BLCA	central gene	1.37602e-05	De-facto noncognate
CSMD3	LUAD	neighboring genes	1.04685e-05	De-facto cognate
CSMD3	LUAD	central gene	3.89152e-05	De-facto cognate
CTCF	BLCA	neighboring genes	6.09545e-06	De-facto cognate
CTCF	BLCA	central gene	1.2986e-05	De-facto cognate
CTCF	COREAD	neighboring genes	1.82243e-06	De-facto noncognate
CTCF	COREAD	central gene	2.56251e-06	De-facto noncognate
CTCF	HNSC	neighboring genes	3.08869e-06	De-facto cognate
CTCF	HNSC	central gene	1.13295e-05	De-facto cognate
CTNNA2	LUAD	neighboring genes	9.86971e-06	De-facto cognate
CTNNA2	LUAD	central gene	3.1799e-05	De-facto cognate
CTNNB1	COREAD	neighboring genes	3.38475e-06	De-facto cognate
CTNNB1	COREAD	central gene	1.14622e-05	De-facto cognate
CTNNB1	HNSC	neighboring genes	2.07845e-06	De-facto noncognate
CTNNB1	HNSC	central gene	3.69523e-06	De-facto noncognate
CTNNB1	LUAD	neighboring genes	4.44793e-06	De-facto cognate
CTNNB1	LUAD	central gene	1.49281e-05	De-facto cognate
CTNND1	BLCA	neighboring genes	5.41796e-06	De-facto noncognate
CTNND1	BLCA	central gene	3.352e-06	De-facto noncognate
CTNND1	COREAD	neighboring genes	2.93145e-06	De-facto noncognate
CTNND1	COREAD	central gene	1.65362e-06	De-facto noncognate
CTNND1	HNSC	neighboring genes	3.04958e-06	De-facto noncognate
CTNND1	HNSC	central gene	2.43702e-06	De-facto noncognate
CTNND2	BLCA	neighboring genes	1.40949e-05	De-facto noncognate
CTNND2	BLCA	central gene	9.58257e-06	De-facto noncognate
CTNND2	COREAD	neighboring genes	1.00935e-05	De-facto noncognate
CTNND2	COREAD	central gene	9.45458e-06	De-facto noncognate
CTNND2	LUAD	neighboring genes	2.07171e-05	De-facto noncognate
CTNND2	LUAD	central gene	2.80248e-05	De-facto noncognate
CUL3	COREAD	neighboring genes	2.89721e-06	De-facto noncognate
CUL3	COREAD	central gene	3.14238e-06	De-facto noncognate
CUL3	HNSC	neighboring genes	1.79055e-06	De-facto cognate
CUL3	HNSC	central gene	9.84107e-06	De-facto cognate
CUL3	LUAD	neighboring genes	8.3163e-06	De-facto noncognate
CUL3	LUAD	central gene	7.52146e-06	De-facto noncognate
CXCR4	BLCA	neighboring genes	6.46752e-06	De-facto noncognate
CXCR4	BLCA	central gene	5.75775e-06	De-facto noncognate
CXCR4	COREAD	neighboring genes	3.19057e-06	De-facto noncognate
CXCR4	COREAD	central gene	0	De-facto noncognate
CXCR4	HNSC	neighboring genes	5.14993e-06	De-facto noncognate
CXCR4	HNSC	central gene	2.09304e-06	De-facto noncognate
CXCR4	LUAD	neighboring genes	1.06102e-05	De-facto noncognate
CXCR4	LUAD	central gene	1.11979e-05	De-facto noncognate
CYLD	BLCA	neighboring genes	7.21235e-06	De-facto noncognate
CYLD	BLCA	central gene	4.9369e-06	De-facto noncognate
CYLD	COREAD	neighboring genes	3.71973e-06	De-facto noncognate
CYLD	COREAD	central gene	2.73991e-06	De-facto noncognate
CYLD	HNSC	neighboring genes	3.33685e-06	De-facto cognate
CYLD	HNSC	central gene	6.28127e-06	De-facto cognate
CYSLTR2	BLCA	neighboring genes	9.42776e-06	De-facto noncognate
CYSLTR2	BLCA	central gene	5.2119e-06	De-facto noncognate
DCC	COREAD	neighboring genes	6.23798e-06	De-facto noncognate
DCC	COREAD	central gene	7.43947e-06	De-facto noncognate
DCC	HNSC	neighboring genes	6.89493e-06	De-facto noncognate
DCC	HNSC	central gene	8.58047e-06	De-facto noncognate
DCC	LUAD	neighboring genes	1.40527e-05	De-facto noncognate
DCC	LUAD	central gene	1.093e-05	De-facto noncognate
DDIT3	COREAD	neighboring genes	2.17664e-06	De-facto noncognate
DDIT3	COREAD	central gene	1.68014e-06	De-facto noncognate
DDIT3	HNSC	neighboring genes	2.95895e-06	De-facto noncognate
DDIT3	HNSC	central gene	0	De-facto noncognate
DDIT3	LUAD	neighboring genes	3.99462e-06	De-facto noncognate
DDIT3	LUAD	central gene	3.78494e-06	De-facto noncognate
DDR2	BLCA	neighboring genes	5.37859e-06	De-facto noncognate
DDR2	BLCA	central gene	6.39586e-06	De-facto noncognate
DDR2	COREAD	neighboring genes	1.37975e-06	De-facto cognate
DDR2	COREAD	central gene	4.90811e-06	De-facto cognate
DDX10	BLCA	neighboring genes	8.62076e-06	De-facto noncognate
DDX10	BLCA	central gene	8.87732e-06	De-facto noncognate
DDX10	COREAD	neighboring genes	3.10782e-06	De-facto noncognate
DDX10	COREAD	central gene	2.55463e-06	De-facto noncognate
DDX10	HNSC	neighboring genes	3.85698e-06	De-facto noncognate
DDX10	HNSC	central gene	2.15137e-06	De-facto noncognate
DDX10	LUAD	neighboring genes	5.89572e-06	De-facto noncognate
DDX10	LUAD	central gene	4.93283e-06	De-facto noncognate
DDX3X	BLCA	neighboring genes	5.52342e-06	De-facto noncognate
DDX3X	BLCA	central gene	7.52106e-06	De-facto noncognate
DDX3X	COREAD	neighboring genes	3.08813e-06	De-facto noncognate
DDX3X	COREAD	central gene	3.7103e-06	De-facto noncognate
DDX3X	HNSC	neighboring genes	2.94486e-06	De-facto noncognate
DDX3X	HNSC	central gene	2.73403e-06	De-facto noncognate
DDX3X	LUAD	neighboring genes	3.88763e-06	De-facto noncognate
DDX3X	LUAD	central gene	2.0896e-06	De-facto noncognate
DDX5	BLCA	neighboring genes	5.36911e-06	De-facto noncognate
DDX5	BLCA	central gene	1.31756e-05	De-facto noncognate
DDX5	COREAD	neighboring genes	3.7693e-06	De-facto noncognate
DDX5	COREAD	central gene	0	De-facto noncognate
DDX5	HNSC	neighboring genes	3.15285e-06	De-facto noncognate
DDX5	HNSC	central gene	0	De-facto noncognate
DDX5	LUAD	neighboring genes	5.0489e-06	De-facto noncognate
DDX5	LUAD	central gene	0	De-facto noncognate
DDX6	BLCA	neighboring genes	6.3792e-06	De-facto noncognate
DDX6	BLCA	central gene	8.98676e-06	De-facto noncognate
DDX6	COREAD	neighboring genes	1.78613e-06	De-facto noncognate
DDX6	COREAD	central gene	1.90001e-06	De-facto noncognate
DDX6	HNSC	neighboring genes	2.38162e-06	De-facto noncognate
DDX6	HNSC	central gene	1.86677e-06	De-facto noncognate
DDX6	LUAD	neighboring genes	4.11953e-06	De-facto noncognate
DDX6	LUAD	central gene	1.42676e-06	De-facto noncognate
DICER1	BLCA	neighboring genes	9.56654e-06	De-facto noncognate
DICER1	BLCA	central gene	6.13234e-06	De-facto noncognate
DICER1	COREAD	neighboring genes	1.73872e-06	De-facto noncognate
DICER1	COREAD	central gene	2.11765e-06	De-facto noncognate
DICER1	HNSC	neighboring genes	7.32126e-06	De-facto noncognate
DICER1	HNSC	central gene	3.56674e-06	De-facto noncognate
DICER1	LUAD	neighboring genes	3.35735e-06	De-facto noncognate
DICER1	LUAD	central gene	4.08905e-06	De-facto noncognate
DNM2	BLCA	neighboring genes	6.87581e-06	De-facto noncognate
DNM2	BLCA	central gene	9.45762e-06	De-facto noncognate
DNM2	COREAD	neighboring genes	2.59746e-06	De-facto noncognate
DNM2	COREAD	central gene	2.33282e-06	De-facto noncognate
DNM2	LUAD	neighboring genes	4.44023e-06	De-facto noncognate
DNM2	LUAD	central gene	1.87689e-06	De-facto noncognate
DNMT3A	COREAD	neighboring genes	3.35114e-06	De-facto noncognate
DNMT3A	COREAD	central gene	4.25906e-06	De-facto noncognate
DNMT3A	LUAD	neighboring genes	2.30673e-06	De-facto cognate
DNMT3A	LUAD	central gene	9.59464e-06	De-facto cognate
DROSHA	BLCA	neighboring genes	8.19858e-06	De-facto noncognate
DROSHA	BLCA	central gene	5.15484e-06	De-facto noncognate
DROSHA	HNSC	neighboring genes	1.98688e-06	De-facto noncognate
DROSHA	HNSC	central gene	2.18619e-06	De-facto noncognate
DTX1	BLCA	neighboring genes	4.89521e-06	De-facto noncognate
DTX1	BLCA	central gene	5.13968e-06	De-facto noncognate
DTX1	COREAD	neighboring genes	3.56987e-06	De-facto noncognate
DTX1	COREAD	central gene	3.54972e-06	De-facto noncognate
DTX1	HNSC	neighboring genes	2.94003e-06	De-facto noncognate
DTX1	HNSC	central gene	1.49469e-06	De-facto noncognate
DTX1	LUAD	neighboring genes	5.20368e-06	De-facto noncognate
DTX1	LUAD	central gene	6.28309e-06	De-facto noncognate
EBF1	BLCA	neighboring genes	7.9936e-06	De-facto noncognate
EBF1	BLCA	central gene	7.64044e-06	De-facto noncognate
EBF1	COREAD	neighboring genes	4.6828e-06	De-facto noncognate
EBF1	COREAD	central gene	1.03653e-05	De-facto noncognate
EBF1	HNSC	neighboring genes	1.4529e-06	De-facto cognate
EBF1	HNSC	central gene	9.02665e-06	De-facto cognate
EBF1	LUAD	neighboring genes	9.71639e-06	De-facto noncognate
EBF1	LUAD	central gene	1.43287e-05	De-facto noncognate
EGFR	BLCA	neighboring genes	4.99093e-06	De-facto noncognate
EGFR	BLCA	central gene	5.07556e-06	De-facto noncognate
EGFR	COREAD	neighboring genes	4.10356e-06	De-facto noncognate
EGFR	COREAD	central gene	4.32489e-06	De-facto noncognate
EGFR	LUAD	neighboring genes	6.93324e-06	De-facto cognate
EGFR	LUAD	central gene	5.56373e-05	De-facto cognate
EIF3E	HNSC	neighboring genes	8.30592e-06	De-facto noncognate
EIF3E	HNSC	central gene	5.6959e-06	De-facto noncognate
EIF3E	LUAD	neighboring genes	8.88742e-06	De-facto noncognate
EIF3E	LUAD	central gene	6.96534e-06	De-facto noncognate
ELF3	BLCA	neighboring genes	4.50888e-06	De-facto cognate
ELF3	BLCA	central gene	8.57915e-05	De-facto cognate
ELF3	HNSC	neighboring genes	4.37081e-06	De-facto noncognate
ELF3	HNSC	central gene	2.49494e-06	De-facto noncognate
ELK4	BLCA	neighboring genes	6.72444e-06	De-facto noncognate
ELK4	BLCA	central gene	8.48772e-06	De-facto noncognate
ELK4	COREAD	neighboring genes	2.63877e-06	De-facto noncognate
ELK4	COREAD	central gene	1.39572e-06	De-facto noncognate
ELK4	HNSC	neighboring genes	5.11112e-06	De-facto noncognate
ELK4	HNSC	central gene	3.08543e-06	De-facto noncognate
ELK4	LUAD	neighboring genes	5.01037e-06	De-facto noncognate
ELK4	LUAD	central gene	5.5024e-06	De-facto noncognate
ELL	BLCA	neighboring genes	5.30643e-06	De-facto noncognate
ELL	BLCA	central gene	0	De-facto noncognate
ELL	HNSC	neighboring genes	3.19023e-06	De-facto noncognate
ELL	HNSC	central gene	1.4453e-06	De-facto noncognate
ELL	LUAD	neighboring genes	2.43827e-06	De-facto noncognate
ELL	LUAD	central gene	2.76159e-06	De-facto noncognate
EP300	BLCA	neighboring genes	5.74831e-06	De-facto cognate
EP300	BLCA	central gene	1.85251e-05	De-facto cognate
EP300	COREAD	neighboring genes	1.62639e-06	De-facto noncognate
EP300	COREAD	central gene	2.12822e-06	De-facto noncognate
EP300	HNSC	neighboring genes	3.25733e-06	De-facto cognate
EP300	HNSC	central gene	8.67142e-06	De-facto cognate
EP300	LUAD	neighboring genes	2.30166e-06	De-facto cognate
EP300	LUAD	central gene	3.38426e-06	De-facto cognate
EPHA2	HNSC	neighboring genes	2.69567e-06	De-facto cognate
EPHA2	HNSC	central gene	1.13295e-05	De-facto cognate
EPHA7	COREAD	neighboring genes	1.14615e-05	De-facto noncognate
EPHA7	COREAD	central gene	8.94482e-06	De-facto noncognate
EPHA7	HNSC	neighboring genes	9.74507e-06	De-facto noncognate
EPHA7	HNSC	central gene	1.0455e-05	De-facto noncognate
EPHA7	LUAD	neighboring genes	1.24135e-05	De-facto noncognate
EPHA7	LUAD	central gene	1.38969e-05	De-facto noncognate
ERBB2	BLCA	neighboring genes	7.50297e-06	De-facto cognate
ERBB2	BLCA	central gene	4.01012e-05	De-facto cognate
ERBB2	COREAD	neighboring genes	2.29424e-06	De-facto cognate
ERBB2	COREAD	central gene	8.65496e-06	De-facto cognate
ERBB3	BLCA	neighboring genes	6.18244e-06	De-facto cognate
ERBB3	BLCA	central gene	1.95874e-05	De-facto cognate
ERBB3	COREAD	neighboring genes	2.07655e-06	De-facto noncognate
ERBB3	COREAD	central gene	2.2299e-06	De-facto noncognate
ERCC2	BLCA	neighboring genes	6.39823e-06	De-facto cognate
ERCC2	BLCA	central gene	3.49169e-05	De-facto cognate
ERCC2	COREAD	neighboring genes	2.45084e-06	De-facto noncognate
ERCC2	COREAD	central gene	2.24678e-06	De-facto noncognate
ERCC2	HNSC	neighboring genes	2.95522e-06	De-facto noncognate
ERCC2	HNSC	central gene	3.86306e-06	De-facto noncognate
ERCC2	LUAD	neighboring genes	3.05336e-06	De-facto noncognate
ERCC2	LUAD	central gene	3.79608e-06	De-facto noncognate
ERCC3	BLCA	neighboring genes	5.85966e-06	De-facto noncognate
ERCC3	BLCA	central gene	4.62045e-06	De-facto noncognate
ERCC3	COREAD	neighboring genes	8.25913e-07	De-facto noncognate
ERCC3	COREAD	central gene	7.59788e-07	De-facto noncognate
ERCC3	LUAD	neighboring genes	2.63583e-06	De-facto noncognate
ERCC3	LUAD	central gene	2.13952e-06	De-facto noncognate
ERCC4	BLCA	neighboring genes	4.1249e-06	De-facto noncognate
ERCC4	BLCA	central gene	5.32072e-06	De-facto noncognate
ERCC4	COREAD	neighboring genes	1.62792e-06	De-facto noncognate
ERCC4	COREAD	central gene	1.96862e-06	De-facto noncognate
ERCC4	HNSC	neighboring genes	4.49841e-06	De-facto noncognate
ERCC4	HNSC	central gene	1.93417e-06	De-facto noncognate
ERCC4	LUAD	neighboring genes	5.04255e-06	De-facto noncognate
ERCC4	LUAD	central gene	5.9131e-06	De-facto noncognate
ERCC5	BLCA	neighboring genes	6.82844e-06	De-facto noncognate
ERCC5	BLCA	central gene	4.37766e-06	De-facto noncognate
ERCC5	COREAD	neighboring genes	3.68442e-06	De-facto noncognate
ERCC5	COREAD	central gene	1.91964e-06	De-facto noncognate
ERCC5	HNSC	neighboring genes	2.32711e-06	De-facto noncognate
ERCC5	HNSC	central gene	3.18271e-06	De-facto noncognate
ERCC5	LUAD	neighboring genes	4.98007e-06	De-facto noncognate
ERCC5	LUAD	central gene	5.13532e-06	De-facto noncognate
ERRFI1	BLCA	neighboring genes	7.7069e-06	De-facto noncognate
ERRFI1	BLCA	central gene	4.01718e-06	De-facto noncognate
ERRFI1	COREAD	neighboring genes	2.75037e-06	De-facto noncognate
ERRFI1	COREAD	central gene	1.98176e-06	De-facto noncognate
ERRFI1	HNSC	neighboring genes	2.50355e-06	De-facto noncognate
ERRFI1	HNSC	central gene	1.94709e-06	De-facto noncognate
ETV1	BLCA	neighboring genes	8.25902e-06	De-facto noncognate
ETV1	BLCA	central gene	1.13099e-05	De-facto noncognate
ETV1	COREAD	neighboring genes	4.97976e-06	De-facto noncognate
ETV1	COREAD	central gene	3.90558e-06	De-facto noncognate
ETV1	LUAD	neighboring genes	1.07083e-05	De-facto noncognate
ETV1	LUAD	central gene	3.14226e-06	De-facto noncognate
ETV4	BLCA	neighboring genes	6.89769e-06	De-facto noncognate
ETV4	BLCA	central gene	1.07373e-05	De-facto noncognate
ETV4	COREAD	neighboring genes	1.64272e-06	De-facto noncognate
ETV4	COREAD	central gene	1.76564e-06	De-facto noncognate
ETV4	HNSC	neighboring genes	2.3345e-06	De-facto noncognate
ETV4	HNSC	central gene	8.67373e-07	De-facto noncognate
ETV4	LUAD	neighboring genes	3.43632e-06	De-facto noncognate
ETV4	LUAD	central gene	1.32585e-06	De-facto noncognate
ETV5	BLCA	neighboring genes	7.60251e-06	De-facto noncognate
ETV5	BLCA	central gene	7.87251e-06	De-facto noncognate
ETV5	HNSC	neighboring genes	3.94806e-06	De-facto noncognate
ETV5	HNSC	central gene	4.08827e-06	De-facto noncognate
ETV5	LUAD	neighboring genes	3.77185e-06	De-facto noncognate
ETV5	LUAD	central gene	2.49971e-06	De-facto noncognate
EXT1	COREAD	neighboring genes	8.16947e-06	De-facto noncognate
EXT1	COREAD	central gene	0	De-facto noncognate
EXT1	LUAD	neighboring genes	9.20192e-06	De-facto noncognate
EXT1	LUAD	central gene	0	De-facto noncognate
EXT2	BLCA	neighboring genes	4.39067e-06	De-facto noncognate
EXT2	BLCA	central gene	4.77107e-06	De-facto noncognate
EXT2	COREAD	neighboring genes	2.76768e-06	De-facto noncognate
EXT2	COREAD	central gene	0	De-facto noncognate
EXT2	LUAD	neighboring genes	5.55721e-06	De-facto noncognate
EXT2	LUAD	central gene	5.7441e-06	De-facto noncognate
EZH2	BLCA	neighboring genes	1.0109e-05	De-facto noncognate
EZH2	BLCA	central gene	5.00246e-06	De-facto noncognate
EZH2	COREAD	neighboring genes	2.7048e-06	De-facto noncognate
EZH2	COREAD	central gene	8.22607e-07	De-facto noncognate
EZH2	HNSC	neighboring genes	3.2388e-06	De-facto noncognate
EZH2	HNSC	central gene	2.42464e-06	De-facto noncognate
EZH2	LUAD	neighboring genes	7.42617e-06	De-facto noncognate
EZH2	LUAD	central gene	6.94925e-06	De-facto noncognate
FAM8A1	BLCA	neighboring genes	5.19989e-06	De-facto noncognate
FAM8A1	BLCA	central gene	6.9855e-06	De-facto noncognate
FAM8A1	COREAD	neighboring genes	2.73623e-06	De-facto noncognate
FAM8A1	COREAD	central gene	4.13532e-06	De-facto noncognate
FAM8A1	HNSC	neighboring genes	2.2683e-06	De-facto noncognate
FAM8A1	HNSC	central gene	4.06296e-06	De-facto noncognate
FAM8A1	LUAD	neighboring genes	5.39356e-06	De-facto noncognate
FAM8A1	LUAD	central gene	3.10529e-06	De-facto noncognate
FANCC	COREAD	neighboring genes	1.36575e-06	De-facto noncognate
FANCC	COREAD	central gene	2.45039e-06	De-facto noncognate
FANCC	LUAD	neighboring genes	4.61507e-06	De-facto noncognate
FANCC	LUAD	central gene	1.10403e-06	De-facto noncognate
FANCD2	BLCA	neighboring genes	6.73014e-06	De-facto noncognate
FANCD2	BLCA	central gene	8.19031e-06	De-facto noncognate
FANCD2	COREAD	neighboring genes	2.22599e-06	De-facto noncognate
FANCD2	COREAD	central gene	2.2447e-06	De-facto noncognate
FANCD2	LUAD	neighboring genes	2.5923e-06	De-facto noncognate
FANCD2	LUAD	central gene	1.51703e-06	De-facto noncognate
FANCE	BLCA	neighboring genes	6.05252e-06	De-facto noncognate
FANCE	BLCA	central gene	4.66121e-06	De-facto noncognate
FANCE	COREAD	neighboring genes	2.63965e-06	De-facto noncognate
FANCE	COREAD	central gene	1.14974e-06	De-facto noncognate
FANCE	HNSC	neighboring genes	2.4234e-06	De-facto noncognate
FANCE	HNSC	central gene	0	De-facto noncognate
FANCE	LUAD	neighboring genes	3.89935e-06	De-facto noncognate
FANCE	LUAD	central gene	1.94256e-06	De-facto noncognate
FANCF	BLCA	neighboring genes	4.31144e-06	De-facto noncognate
FANCF	BLCA	central gene	7.95178e-06	De-facto noncognate
FANCF	LUAD	neighboring genes	6.38859e-06	De-facto noncognate
FANCF	LUAD	central gene	1.76742e-06	De-facto noncognate
FANCG	BLCA	neighboring genes	5.9084e-06	De-facto noncognate
FANCG	BLCA	central gene	3.09615e-06	De-facto noncognate
FANCG	COREAD	neighboring genes	1.87119e-06	De-facto noncognate
FANCG	COREAD	central gene	1.01826e-06	De-facto noncognate
FANCG	HNSC	neighboring genes	2.86374e-06	De-facto noncognate
FANCG	HNSC	central gene	3.75168e-06	De-facto noncognate
FANCG	LUAD	neighboring genes	3.32364e-06	De-facto noncognate
FANCG	LUAD	central gene	4.58781e-06	De-facto noncognate
FAS	BLCA	neighboring genes	5.8836e-06	De-facto noncognate
FAS	BLCA	central gene	1.85514e-06	De-facto noncognate
FAS	LUAD	neighboring genes	2.78854e-06	De-facto noncognate
FAS	LUAD	central gene	2.06168e-06	De-facto noncognate
FAT1	BLCA	neighboring genes	2.89736e-06	De-facto noncognate
FAT1	BLCA	central gene	4.81348e-06	De-facto noncognate
FAT1	LUAD	neighboring genes	7.08385e-06	De-facto noncognate
FAT1	LUAD	central gene	2.67469e-06	De-facto noncognate
FAT4	COREAD	neighboring genes	1.09732e-06	De-facto noncognate
FAT4	COREAD	central gene	1.19282e-06	De-facto noncognate
FBLN2	BLCA	neighboring genes	7.89559e-06	De-facto noncognate
FBLN2	BLCA	central gene	4.96167e-06	De-facto noncognate
FBLN2	COREAD	neighboring genes	6.89127e-06	De-facto noncognate
FBLN2	COREAD	central gene	3.67154e-06	De-facto noncognate
FBLN2	HNSC	neighboring genes	2.20783e-06	De-facto noncognate
FBLN2	HNSC	central gene	4.68949e-06	De-facto noncognate
FBLN2	LUAD	neighboring genes	6.74972e-06	De-facto noncognate
FBLN2	LUAD	central gene	6.61688e-06	De-facto noncognate
FBXO11	BLCA	neighboring genes	6.59107e-06	De-facto noncognate
FBXO11	BLCA	central gene	7.52733e-06	De-facto noncognate
FBXO11	COREAD	neighboring genes	2.36474e-06	De-facto noncognate
FBXO11	COREAD	central gene	3.71339e-06	De-facto noncognate
FBXO11	HNSC	neighboring genes	3.04941e-06	De-facto noncognate
FBXO11	HNSC	central gene	2.18905e-06	De-facto noncognate
FBXO11	LUAD	neighboring genes	4.49481e-06	De-facto noncognate
FBXO11	LUAD	central gene	2.92788e-06	De-facto noncognate
FBXW7	BLCA	neighboring genes	5.04381e-06	De-facto cognate
FBXW7	BLCA	central gene	3.85489e-05	De-facto cognate
FBXW7	COREAD	neighboring genes	1.55514e-06	De-facto cognate
FBXW7	COREAD	central gene	5.27722e-05	De-facto cognate
FBXW7	HNSC	neighboring genes	4.1254e-06	De-facto cognate
FBXW7	HNSC	central gene	2.10198e-05	De-facto cognate
FCRL4	BLCA	neighboring genes	2.88096e-06	De-facto noncognate
FCRL4	BLCA	central gene	5.43037e-06	De-facto noncognate
FCRL4	COREAD	neighboring genes	1.80885e-06	De-facto noncognate
FCRL4	COREAD	central gene	5.35783e-07	De-facto noncognate
FCRL4	HNSC	neighboring genes	3.04663e-06	De-facto cognate
FCRL4	HNSC	central gene	1.26338e-05	De-facto cognate
FCRL4	LUAD	neighboring genes	9.4596e-06	De-facto noncognate
FCRL4	LUAD	central gene	6.63845e-06	De-facto noncognate
FEN1	BLCA	neighboring genes	4.6976e-06	De-facto noncognate
FEN1	BLCA	central gene	6.01685e-06	De-facto noncognate
FEN1	COREAD	neighboring genes	2.31743e-06	De-facto noncognate
FEN1	COREAD	central gene	0	De-facto noncognate
FEN1	HNSC	neighboring genes	3.41532e-06	De-facto noncognate
FEN1	HNSC	central gene	2.9163e-06	De-facto noncognate
FEN1	LUAD	neighboring genes	2.6103e-06	De-facto noncognate
FEN1	LUAD	central gene	1.11445e-06	De-facto noncognate
FEV	BLCA	neighboring genes	4.55663e-06	De-facto noncognate
FEV	BLCA	central gene	0	De-facto noncognate
FEV	COREAD	neighboring genes	1.52443e-06	De-facto noncognate
FEV	COREAD	central gene	0	De-facto noncognate
FEV	HNSC	neighboring genes	1.67545e-06	De-facto noncognate
FEV	HNSC	central gene	0	De-facto noncognate
FEV	LUAD	neighboring genes	3.43417e-06	De-facto noncognate
FEV	LUAD	central gene	4.02815e-06	De-facto noncognate
FGFR1	BLCA	neighboring genes	5.05247e-06	De-facto noncognate
FGFR1	BLCA	central gene	6.60587e-06	De-facto noncognate
FGFR1	COREAD	neighboring genes	2.31446e-06	De-facto noncognate
FGFR1	COREAD	central gene	2.03676e-06	De-facto noncognate
FGFR1	HNSC	neighboring genes	3.58586e-06	De-facto noncognate
FGFR1	HNSC	central gene	6.00337e-07	De-facto noncognate
FGFR2	HNSC	neighboring genes	3.83293e-06	De-facto noncognate
FGFR2	HNSC	central gene	3.14106e-06	De-facto noncognate
FGFR2	LUAD	neighboring genes	3.83086e-06	De-facto noncognate
FGFR2	LUAD	central gene	4.80138e-06	De-facto noncognate
FGFR3	BLCA	neighboring genes	6.62317e-06	De-facto cognate
FGFR3	BLCA	central gene	4.5612e-05	De-facto cognate
FGFR3	COREAD	neighboring genes	1.27853e-06	De-facto noncognate
FGFR3	COREAD	central gene	1.66677e-06	De-facto noncognate
FGFR3	HNSC	neighboring genes	2.16338e-06	De-facto cognate
FGFR3	HNSC	central gene	1.04397e-05	De-facto cognate
FGFR3	LUAD	neighboring genes	3.46693e-06	De-facto noncognate
FGFR3	LUAD	central gene	2.81612e-06	De-facto noncognate
FGFR4	BLCA	neighboring genes	6.01808e-06	De-facto noncognate
FGFR4	BLCA	central gene	5.83924e-06	De-facto noncognate
FGFR4	COREAD	neighboring genes	3.47127e-06	De-facto noncognate
FGFR4	COREAD	central gene	1.44031e-06	De-facto noncognate
FGFR4	LUAD	neighboring genes	6.84244e-06	De-facto noncognate
FGFR4	LUAD	central gene	6.89493e-06	De-facto noncognate
FH	LUAD	neighboring genes	3.93626e-06	De-facto noncognate
FH	LUAD	central gene	3.48267e-06	De-facto noncognate
FHIT	BLCA	neighboring genes	8.05314e-06	De-facto noncognate
FHIT	BLCA	central gene	1.46158e-05	De-facto noncognate
FHIT	COREAD	neighboring genes	1.13508e-05	De-facto noncognate
FHIT	COREAD	central gene	3.60515e-06	De-facto noncognate
FHIT	HNSC	neighboring genes	5.85491e-06	De-facto noncognate
FHIT	HNSC	central gene	2.65655e-06	De-facto noncognate
FHIT	LUAD	neighboring genes	7.6712e-06	De-facto noncognate
FHIT	LUAD	central gene	8.12153e-06	De-facto noncognate
FIP1L1	BLCA	neighboring genes	9.24991e-06	De-facto noncognate
FIP1L1	BLCA	central gene	5.51162e-06	De-facto noncognate
FIP1L1	COREAD	neighboring genes	4.56318e-06	De-facto noncognate
FIP1L1	COREAD	central gene	4.53166e-06	De-facto noncognate
FIP1L1	LUAD	neighboring genes	4.4056e-06	De-facto noncognate
FIP1L1	LUAD	central gene	5.10437e-06	De-facto noncognate
FLCN	BLCA	neighboring genes	7.38012e-06	De-facto noncognate
FLCN	BLCA	central gene	4.94197e-06	De-facto noncognate
FLCN	HNSC	neighboring genes	2.08662e-06	De-facto noncognate
FLCN	HNSC	central gene	1.79649e-06	De-facto noncognate
FLCN	LUAD	neighboring genes	2.73393e-06	De-facto cognate
FLCN	LUAD	central gene	6.86522e-06	De-facto cognate
FLI1	BLCA	neighboring genes	5.96622e-06	De-facto noncognate
FLI1	BLCA	central gene	0	De-facto noncognate
FLI1	COREAD	neighboring genes	4.28112e-06	De-facto noncognate
FLI1	COREAD	central gene	9.57497e-06	De-facto noncognate
FLI1	LUAD	neighboring genes	6.32908e-06	De-facto noncognate
FLI1	LUAD	central gene	1.0785e-05	De-facto noncognate
FLT3	BLCA	neighboring genes	4.24033e-06	De-facto noncognate
FLT3	BLCA	central gene	6.26162e-06	De-facto noncognate
FLT3	COREAD	neighboring genes	5.22961e-06	De-facto noncognate
FLT3	COREAD	central gene	3.93144e-06	De-facto noncognate
FLT3	HNSC	neighboring genes	4.81697e-06	De-facto noncognate
FLT3	HNSC	central gene	2.48313e-06	De-facto noncognate
FLT4	BLCA	neighboring genes	5.5848e-06	De-facto noncognate
FLT4	BLCA	central gene	5.2818e-06	De-facto noncognate
FLT4	HNSC	neighboring genes	3.38362e-06	De-facto noncognate
FLT4	HNSC	central gene	4.16005e-06	De-facto noncognate
FLT4	LUAD	neighboring genes	5.30145e-06	De-facto noncognate
FLT4	LUAD	central gene	5.62526e-06	De-facto noncognate
FOXA1	COREAD	neighboring genes	3.39098e-06	De-facto noncognate
FOXA1	COREAD	central gene	4.9505e-06	De-facto noncognate
FOXA1	HNSC	neighboring genes	3.66481e-06	De-facto noncognate
FOXA1	HNSC	central gene	3.64791e-06	De-facto noncognate
FOXR1	BLCA	neighboring genes	4.00234e-06	De-facto noncognate
FOXR1	BLCA	central gene	0	De-facto noncognate
FOXR1	HNSC	neighboring genes	3.27357e-06	De-facto noncognate
FOXR1	HNSC	central gene	4.19277e-06	De-facto noncognate
FOXR1	LUAD	neighboring genes	3.33595e-06	De-facto noncognate
FOXR1	LUAD	central gene	3.2045e-06	De-facto noncognate
FUBP1	COREAD	neighboring genes	1.90679e-06	De-facto noncognate
FUBP1	COREAD	central gene	3.70589e-06	De-facto noncognate
FUBP1	HNSC	neighboring genes	4.49623e-06	De-facto noncognate
FUBP1	HNSC	central gene	3.90112e-06	De-facto noncognate
FUBP1	LUAD	neighboring genes	7.44561e-06	De-facto noncognate
FUBP1	LUAD	central gene	6.55951e-06	De-facto noncognate
GATA3	BLCA	neighboring genes	8.92354e-06	De-facto noncognate
GATA3	BLCA	central gene	1.14607e-05	De-facto noncognate
GATA3	COREAD	neighboring genes	7.92391e-06	De-facto noncognate
GATA3	COREAD	central gene	8.48069e-06	De-facto noncognate
GATA3	LUAD	neighboring genes	1.05121e-05	De-facto noncognate
GATA3	LUAD	central gene	1.19406e-05	De-facto noncognate
GLI1	BLCA	neighboring genes	5.93562e-06	De-facto noncognate
GLI1	BLCA	central gene	6.31322e-06	De-facto noncognate
GLI1	COREAD	neighboring genes	3.69874e-06	De-facto noncognate
GLI1	COREAD	central gene	3.63352e-06	De-facto noncognate
GLI1	HNSC	neighboring genes	3.17977e-06	De-facto noncognate
GLI1	HNSC	central gene	3.82494e-06	De-facto noncognate
GNA11	BLCA	neighboring genes	7.08271e-06	De-facto noncognate
GNA11	BLCA	central gene	6.61192e-06	De-facto noncognate
GNA11	HNSC	neighboring genes	2.63748e-06	De-facto noncognate
GNA11	HNSC	central gene	3.60532e-06	De-facto noncognate
GNA11	LUAD	neighboring genes	2.78374e-06	De-facto noncognate
GNA11	LUAD	central gene	3.67403e-06	De-facto noncognate
GNAQ	BLCA	neighboring genes	4.94149e-06	De-facto noncognate
GNAQ	BLCA	central gene	5.14749e-06	De-facto noncognate
GNAQ	COREAD	neighboring genes	2.08949e-06	De-facto noncognate
GNAQ	COREAD	central gene	3.38582e-06	De-facto noncognate
GNAQ	LUAD	neighboring genes	3.9226e-06	De-facto noncognate
GNAQ	LUAD	central gene	2.86029e-06	De-facto noncognate
GNAS	LUAD	neighboring genes	4.88406e-06	De-facto cognate
GNAS	LUAD	central gene	1.23069e-05	De-facto cognate
GPC5	COREAD	neighboring genes	1.54099e-05	De-facto noncognate
GPC5	COREAD	central gene	9.16962e-06	De-facto noncognate
GPC5	LUAD	neighboring genes	1.3018e-05	De-facto noncognate
GPC5	LUAD	central gene	1.26237e-05	De-facto noncognate
GPS2	BLCA	neighboring genes	5.58413e-06	De-facto cognate
GPS2	BLCA	central gene	1.73563e-05	De-facto cognate
GPS2	HNSC	neighboring genes	2.91354e-06	De-facto cognate
GPS2	HNSC	central gene	6.30931e-06	De-facto cognate
GPS2	LUAD	neighboring genes	2.84738e-06	De-facto noncognate
GPS2	LUAD	central gene	1.92886e-06	De-facto noncognate
GRIN2A	LUAD	neighboring genes	5.46599e-06	De-facto cognate
GRIN2A	LUAD	central gene	1.67049e-05	De-facto cognate
GRM3	BLCA	neighboring genes	9.88619e-06	De-facto noncognate
GRM3	BLCA	central gene	8.05229e-06	De-facto noncognate
GRM3	COREAD	neighboring genes	8.80582e-06	De-facto noncognate
GRM3	COREAD	central gene	1.0593e-05	De-facto noncognate
GRM3	LUAD	neighboring genes	1.78537e-05	De-facto noncognate
GRM3	LUAD	central gene	1.00674e-05	De-facto noncognate
H3F3A	LUAD	neighboring genes	2.75268e-06	De-facto noncognate
H3F3A	LUAD	central gene	0	De-facto noncognate
H3F3B	COREAD	neighboring genes	1.61219e-06	De-facto noncognate
H3F3B	COREAD	central gene	2.01921e-06	De-facto noncognate
HEY1	BLCA	neighboring genes	1.02727e-05	De-facto noncognate
HEY1	BLCA	central gene	5.61157e-06	De-facto noncognate
HEY1	COREAD	neighboring genes	3.6198e-06	De-facto noncognate
HEY1	COREAD	central gene	2.76831e-06	De-facto noncognate
HEY1	LUAD	neighboring genes	4.89273e-06	De-facto noncognate
HEY1	LUAD	central gene	5.19694e-06	De-facto noncognate
HIF1A	BLCA	neighboring genes	3.249e-06	De-facto noncognate
HIF1A	BLCA	central gene	5.51162e-06	De-facto noncognate
HIF1A	HNSC	neighboring genes	2.02469e-06	De-facto noncognate
HIF1A	HNSC	central gene	1.50267e-06	De-facto noncognate
HIF1A	LUAD	neighboring genes	3.61073e-06	De-facto noncognate
HIF1A	LUAD	central gene	1.53131e-06	De-facto noncognate
HLA-A	BLCA	neighboring genes	1.18494e-05	De-facto noncognate
HLA-A	BLCA	central gene	6.70401e-06	De-facto noncognate
HLA-A	HNSC	neighboring genes	1.14865e-05	De-facto noncognate
HLA-A	HNSC	central gene	2.43702e-05	De-facto noncognate
HLA-A	LUAD	neighboring genes	9.87646e-06	De-facto noncognate
HLA-A	LUAD	central gene	1.02443e-05	De-facto noncognate
HLA-B	BLCA	neighboring genes	5.59397e-06	De-facto noncognate
HLA-B	BLCA	central gene	9.83681e-06	De-facto noncognate
HLA-B	HNSC	neighboring genes	3.05026e-06	De-facto cognate
HLA-B	HNSC	central gene	2.02631e-05	De-facto cognate
HMGA1	COREAD	neighboring genes	2.56785e-06	De-facto noncognate
HMGA1	COREAD	central gene	0	De-facto noncognate
HMGA1	HNSC	neighboring genes	5.04583e-06	De-facto noncognate
HMGA1	HNSC	central gene	0	De-facto noncognate
HMGA1	LUAD	neighboring genes	4.65993e-06	De-facto noncognate
HMGA1	LUAD	central gene	0	De-facto noncognate
HMGA2	BLCA	neighboring genes	9.03657e-06	De-facto noncognate
HMGA2	BLCA	central gene	4.93184e-06	De-facto noncognate
HMGA2	COREAD	neighboring genes	5.73163e-06	De-facto noncognate
HMGA2	COREAD	central gene	0	De-facto noncognate
HMGA2	HNSC	neighboring genes	5.86598e-06	De-facto noncognate
HMGA2	HNSC	central gene	1.07569e-05	De-facto noncognate
HMGA2	LUAD	neighboring genes	4.84199e-06	De-facto noncognate
HMGA2	LUAD	central gene	8.22139e-06	De-facto noncognate
HNF1A	BLCA	neighboring genes	7.60649e-06	De-facto noncognate
HNF1A	BLCA	central gene	8.50104e-06	De-facto noncognate
HNF1A	HNSC	neighboring genes	3.84708e-06	De-facto noncognate
HNF1A	HNSC	central gene	2.74691e-06	De-facto noncognate
HNRNPA2B1	BLCA	neighboring genes	2.93346e-06	De-facto cognate
HNRNPA2B1	BLCA	central gene	1.97962e-05	De-facto cognate
HNRNPA2B1	LUAD	neighboring genes	8.69347e-06	De-facto noncognate
HNRNPA2B1	LUAD	central gene	1.10001e-05	De-facto noncognate
HOOK3	BLCA	neighboring genes	3.56417e-06	De-facto noncognate
HOOK3	BLCA	central gene	1.67367e-06	De-facto noncognate
HOOK3	COREAD	neighboring genes	3.22352e-06	De-facto noncognate
HOOK3	COREAD	central gene	2.47697e-06	De-facto noncognate
HOOK3	HNSC	neighboring genes	1.72752e-06	De-facto noncognate
HOOK3	HNSC	central gene	2.43363e-06	De-facto noncognate
HOOK3	LUAD	neighboring genes	4.51112e-06	De-facto noncognate
HOOK3	LUAD	central gene	4.65002e-06	De-facto noncognate
HRAS	BLCA	neighboring genes	4.90887e-06	De-facto cognate
HRAS	BLCA	central gene	4.71629e-05	De-facto cognate
HRAS	HNSC	neighboring genes	3.37908e-06	De-facto cognate
HRAS	HNSC	central gene	0.000118453	De-facto cognate
HS6ST1	BLCA	neighboring genes	5.49403e-06	De-facto noncognate
HS6ST1	BLCA	central gene	2.87429e-06	De-facto noncognate
HS6ST1	COREAD	neighboring genes	2.97261e-06	De-facto noncognate
HS6ST1	COREAD	central gene	1.41795e-06	De-facto noncognate
HS6ST1	LUAD	neighboring genes	3.7422e-06	De-facto noncognate
HS6ST1	LUAD	central gene	4.79144e-06	De-facto noncognate
ID3	BLCA	neighboring genes	7.59517e-06	De-facto noncognate
ID3	BLCA	central gene	1.1317e-05	De-facto noncognate
ID3	HNSC	neighboring genes	2.02704e-06	De-facto noncognate
ID3	HNSC	central gene	0	De-facto noncognate
IDH1	COREAD	neighboring genes	2.26561e-06	De-facto noncognate
IDH1	COREAD	central gene	2.92678e-06	De-facto noncognate
IDH1	LUAD	neighboring genes	3.92606e-06	De-facto noncognate
IDH1	LUAD	central gene	3.29666e-06	De-facto noncognate
IDH2	BLCA	neighboring genes	5.01698e-06	De-facto noncognate
IDH2	BLCA	central gene	4.52773e-06	De-facto noncognate
IDH2	COREAD	neighboring genes	1.60351e-06	De-facto noncognate
IDH2	COREAD	central gene	7.44542e-07	De-facto noncognate
IDH2	HNSC	neighboring genes	2.97966e-06	De-facto noncognate
IDH2	HNSC	central gene	2.19454e-06	De-facto noncognate
IDH2	LUAD	neighboring genes	2.8663e-06	De-facto noncognate
IDH2	LUAD	central gene	8.38636e-07	De-facto noncognate
IGF2BP2	BLCA	neighboring genes	5.83103e-06	De-facto noncognate
IGF2BP2	BLCA	central gene	7.30791e-06	De-facto noncognate
IGF2BP2	COREAD	neighboring genes	3.33682e-06	De-facto noncognate
IGF2BP2	COREAD	central gene	2.57511e-06	De-facto noncognate
IGF2BP2	HNSC	neighboring genes	2.71319e-06	De-facto noncognate
IGF2BP2	HNSC	central gene	1.51803e-06	De-facto noncognate
IGF2BP2	LUAD	neighboring genes	3.24011e-06	De-facto noncognate
IGF2BP2	LUAD	central gene	4.06077e-06	De-facto noncognate
IKBKB	BLCA	neighboring genes	4.29775e-06	De-facto noncognate
IKBKB	BLCA	central gene	6.62405e-06	De-facto noncognate
IKBKB	COREAD	neighboring genes	2.53243e-06	De-facto noncognate
IKBKB	COREAD	central gene	0	De-facto noncognate
IKBKB	LUAD	neighboring genes	4.97524e-06	De-facto noncognate
IKBKB	LUAD	central gene	1.84038e-06	De-facto noncognate
IL6ST	BLCA	neighboring genes	6.21242e-06	De-facto noncognate
IL6ST	BLCA	central gene	5.5884e-06	De-facto noncognate
IL6ST	COREAD	neighboring genes	1.3621e-06	De-facto noncognate
IL6ST	COREAD	central gene	2.14424e-06	De-facto noncognate
IL6ST	HNSC	neighboring genes	3.0111e-06	De-facto noncognate
IL6ST	HNSC	central gene	2.2572e-06	De-facto noncognate
IL6ST	LUAD	neighboring genes	2.68492e-06	De-facto noncognate
IL6ST	LUAD	central gene	2.41523e-06	De-facto noncognate
ITK	HNSC	neighboring genes	5.79747e-06	De-facto noncognate
ITK	HNSC	central gene	1.29167e-06	De-facto noncognate
ITK	LUAD	neighboring genes	1.77239e-05	De-facto noncognate
ITK	LUAD	central gene	1.28338e-05	De-facto noncognate
JMJD1C	COREAD	neighboring genes	2.5025e-06	De-facto noncognate
JMJD1C	COREAD	central gene	2.38253e-06	De-facto noncognate
JMJD1C	HNSC	neighboring genes	1.84403e-06	De-facto noncognate
JMJD1C	HNSC	central gene	3.07236e-06	De-facto noncognate
JMJD1C	LUAD	neighboring genes	6.10731e-06	De-facto noncognate
JMJD1C	LUAD	central gene	3.01909e-06	De-facto noncognate
JUN	BLCA	neighboring genes	5.17801e-06	De-facto noncognate
JUN	BLCA	central gene	2.13869e-06	De-facto noncognate
JUN	COREAD	neighboring genes	1.19206e-06	De-facto noncognate
JUN	COREAD	central gene	2.11012e-06	De-facto noncognate
JUN	HNSC	neighboring genes	2.00778e-06	De-facto noncognate
JUN	HNSC	central gene	0	De-facto noncognate
JUN	LUAD	neighboring genes	1.91817e-06	De-facto noncognate
JUN	LUAD	central gene	2.3768e-06	De-facto noncognate
KAT7	HNSC	neighboring genes	2.72835e-06	De-facto noncognate
KAT7	HNSC	central gene	0	De-facto noncognate
KAT7	LUAD	neighboring genes	3.86159e-06	De-facto noncognate
KAT7	LUAD	central gene	3.42129e-06	De-facto noncognate
KCNJ5	BLCA	neighboring genes	5.74309e-06	De-facto noncognate
KCNJ5	BLCA	central gene	6.26211e-06	De-facto noncognate
KCNJ5	COREAD	neighboring genes	4.53311e-06	De-facto noncognate
KCNJ5	COREAD	central gene	2.31693e-06	De-facto noncognate
KCNJ5	HNSC	neighboring genes	5.42805e-06	De-facto noncognate
KCNJ5	HNSC	central gene	4.55277e-06	De-facto noncognate
KCNJ5	LUAD	neighboring genes	6.06337e-06	De-facto noncognate
KCNJ5	LUAD	central gene	5.21947e-06	De-facto noncognate
KCNT2	BLCA	neighboring genes	1.1452e-05	De-facto noncognate
KCNT2	BLCA	central gene	8.14004e-06	De-facto noncognate
KCNT2	HNSC	neighboring genes	8.44323e-06	De-facto cognate
KCNT2	HNSC	central gene	9.98677e-06	De-facto cognate
KCNT2	LUAD	neighboring genes	1.47884e-05	De-facto noncognate
KCNT2	LUAD	central gene	2.20504e-05	De-facto noncognate
KDM5C	BLCA	neighboring genes	4.17377e-06	De-facto noncognate
KDM5C	BLCA	central gene	1.90809e-06	De-facto noncognate
KDM5C	LUAD	neighboring genes	3.86537e-06	De-facto cognate
KDM5C	LUAD	central gene	5.93747e-06	De-facto cognate
KDM6A	BLCA	neighboring genes	4.44412e-06	De-facto cognate
KDM6A	BLCA	central gene	4.07461e-05	De-facto cognate
KDM6A	COREAD	neighboring genes	4.38476e-06	De-facto noncognate
KDM6A	COREAD	central gene	1.72294e-06	De-facto noncognate
KDM6A	HNSC	neighboring genes	1.61551e-06	De-facto noncognate
KDM6A	HNSC	central gene	4.65517e-06	De-facto noncognate
KDM6A	LUAD	neighboring genes	6.99678e-06	De-facto noncognate
KDM6A	LUAD	central gene	2.91102e-06	De-facto noncognate
KDR	BLCA	neighboring genes	1.00486e-05	De-facto noncognate
KDR	BLCA	central gene	9.98467e-06	De-facto noncognate
KDR	HNSC	neighboring genes	3.84511e-06	De-facto noncognate
KDR	HNSC	central gene	4.41864e-06	De-facto noncognate
KDR	LUAD	neighboring genes	7.0531e-06	De-facto cognate
KDR	LUAD	central gene	1.78506e-05	De-facto cognate
KEAP1	BLCA	neighboring genes	7.39024e-06	De-facto noncognate
KEAP1	BLCA	central gene	8.97479e-06	De-facto noncognate
KEAP1	COREAD	neighboring genes	2.97857e-06	De-facto noncognate
KEAP1	COREAD	central gene	1.10686e-06	De-facto noncognate
KEAP1	HNSC	neighboring genes	3.93314e-06	De-facto cognate
KEAP1	HNSC	central gene	2.69155e-05	De-facto cognate
KEAP1	LUAD	neighboring genes	5.09959e-06	De-facto cognate
KEAP1	LUAD	central gene	6.98179e-05	De-facto cognate
KIT	BLCA	neighboring genes	9.49279e-06	De-facto noncognate
KIT	BLCA	central gene	1.07045e-05	De-facto noncognate
KIT	COREAD	neighboring genes	7.14157e-06	De-facto noncognate
KIT	COREAD	central gene	5.28078e-06	De-facto noncognate
KIT	HNSC	neighboring genes	5.17619e-06	De-facto noncognate
KIT	HNSC	central gene	4.86411e-06	De-facto noncognate
KIT	LUAD	neighboring genes	1.70113e-05	De-facto noncognate
KIT	LUAD	central gene	6.69168e-06	De-facto noncognate
KLF4	COREAD	neighboring genes	2.58048e-06	De-facto noncognate
KLF4	COREAD	central gene	0	De-facto noncognate
KLF4	HNSC	neighboring genes	3.19451e-06	De-facto noncognate
KLF4	HNSC	central gene	1.61817e-06	De-facto noncognate
KLF6	HNSC	neighboring genes	3.12833e-06	De-facto noncognate
KLF6	HNSC	central gene	2.94246e-06	De-facto noncognate
KLK2	BLCA	neighboring genes	4.4015e-06	De-facto noncognate
KLK2	BLCA	central gene	0	De-facto noncognate
KLK2	COREAD	neighboring genes	2.24373e-06	De-facto noncognate
KLK2	COREAD	central gene	0	De-facto noncognate
KLK2	HNSC	neighboring genes	2.18669e-06	De-facto noncognate
KLK2	HNSC	central gene	0	De-facto noncognate
KLK2	LUAD	neighboring genes	5.42145e-06	De-facto noncognate
KLK2	LUAD	central gene	0	De-facto noncognate
KMT2A	BLCA	neighboring genes	5.20055e-06	De-facto cognate
KMT2A	BLCA	central gene	9.98691e-06	De-facto cognate
KMT2A	COREAD	neighboring genes	2.4281e-06	De-facto noncognate
KMT2A	COREAD	central gene	1.43035e-06	De-facto noncognate
KMT2A	LUAD	neighboring genes	4.17985e-06	De-facto noncognate
KMT2A	LUAD	central gene	4.29631e-06	De-facto noncognate
KMT2D	LUAD	neighboring genes	3.56547e-06	De-facto noncognate
KMT2D	LUAD	central gene	2.84542e-06	De-facto noncognate
KNSTRN	BLCA	neighboring genes	5.93699e-06	De-facto noncognate
KNSTRN	BLCA	central gene	2.35647e-06	De-facto noncognate
KNSTRN	HNSC	neighboring genes	3.24999e-06	De-facto noncognate
KNSTRN	HNSC	central gene	1.71323e-06	De-facto noncognate
KNSTRN	LUAD	neighboring genes	3.06612e-06	De-facto noncognate
KNSTRN	LUAD	central gene	1.30941e-06	De-facto noncognate
KRAS	BLCA	neighboring genes	3.13377e-06	De-facto cognate
KRAS	BLCA	central gene	5.52899e-05	De-facto cognate
KRAS	COREAD	neighboring genes	3.09192e-06	De-facto cognate
KRAS	COREAD	central gene	0.000760511	De-facto cognate
KRAS	LUAD	neighboring genes	5.57227e-06	De-facto cognate
KRAS	LUAD	central gene	0.000453613	De-facto cognate
LARP4B	BLCA	neighboring genes	6.21361e-06	De-facto noncognate
LARP4B	BLCA	central gene	7.06326e-06	De-facto noncognate
LARP4B	COREAD	neighboring genes	3.9849e-06	De-facto noncognate
LARP4B	COREAD	central gene	4.64594e-06	De-facto noncognate
LARP4B	HNSC	neighboring genes	3.61401e-06	De-facto noncognate
LARP4B	HNSC	central gene	3.99407e-06	De-facto noncognate
LATS2	BLCA	neighboring genes	7.83397e-06	De-facto noncognate
LATS2	BLCA	central gene	4.32737e-06	De-facto noncognate
LCP1	BLCA	neighboring genes	3.39394e-06	De-facto noncognate
LCP1	BLCA	central gene	4.4746e-06	De-facto noncognate
LCP1	COREAD	neighboring genes	6.05325e-06	De-facto noncognate
LCP1	COREAD	central gene	2.6489e-06	De-facto noncognate
LCP1	HNSC	neighboring genes	3.98598e-06	De-facto cognate
LCP1	HNSC	central gene	1.04102e-05	De-facto cognate
LCP1	LUAD	neighboring genes	7.83374e-06	De-facto noncognate
LCP1	LUAD	central gene	7.45916e-06	De-facto noncognate
LEPROTL1	BLCA	neighboring genes	5.2503e-06	De-facto noncognate
LEPROTL1	BLCA	central gene	0	De-facto noncognate
LEPROTL1	LUAD	neighboring genes	2.33394e-06	De-facto noncognate
LEPROTL1	LUAD	central gene	0	De-facto noncognate
LRIG3	BLCA	neighboring genes	7.28028e-06	De-facto noncognate
LRIG3	BLCA	central gene	6.38444e-06	De-facto noncognate
LRIG3	HNSC	neighboring genes	3.63895e-06	De-facto noncognate
LRIG3	HNSC	central gene	4.21973e-06	De-facto noncognate
LRIG3	LUAD	neighboring genes	4.29825e-06	De-facto noncognate
LRIG3	LUAD	central gene	3.87013e-06	De-facto noncognate
LZTR1	BLCA	neighboring genes	6.95381e-06	De-facto noncognate
LZTR1	BLCA	central gene	5.09491e-06	De-facto noncognate
LZTR1	COREAD	neighboring genes	2.66814e-06	De-facto noncognate
LZTR1	COREAD	central gene	2.15437e-06	De-facto noncognate
LZTR1	HNSC	neighboring genes	2.47165e-06	De-facto noncognate
LZTR1	HNSC	central gene	3.17501e-06	De-facto noncognate
MAF	BLCA	neighboring genes	9.86368e-06	De-facto noncognate
MAF	BLCA	central gene	8.66149e-06	De-facto noncognate
MAF	LUAD	neighboring genes	1.09618e-05	De-facto noncognate
MAF	LUAD	central gene	2.88774e-06	De-facto noncognate
MAFB	BLCA	neighboring genes	8.96798e-06	De-facto noncognate
MAFB	BLCA	central gene	6.86332e-06	De-facto noncognate
MAFB	COREAD	neighboring genes	4.17831e-06	De-facto noncognate
MAFB	COREAD	central gene	3.38582e-06	De-facto noncognate
MAFB	LUAD	neighboring genes	8.30535e-06	De-facto noncognate
MAFB	LUAD	central gene	1.27124e-06	De-facto noncognate
MAGI2	BLCA	neighboring genes	1.23947e-05	De-facto noncognate
MAGI2	BLCA	central gene	1.17211e-05	De-facto noncognate
MAGI2	HNSC	neighboring genes	9.01134e-06	De-facto noncognate
MAGI2	HNSC	central gene	9.29636e-06	De-facto noncognate
MAGI2	LUAD	neighboring genes	2.97242e-05	De-facto noncognate
MAGI2	LUAD	central gene	7.10514e-06	De-facto noncognate
MALT1	COREAD	neighboring genes	1.46219e-06	De-facto noncognate
MALT1	COREAD	central gene	2.11514e-06	De-facto noncognate
MALT1	HNSC	neighboring genes	2.33448e-06	De-facto noncognate
MALT1	HNSC	central gene	2.59766e-06	De-facto noncognate
MALT1	LUAD	neighboring genes	4.52919e-06	De-facto noncognate
MALT1	LUAD	central gene	5.55904e-06	De-facto noncognate
MAML2	COREAD	neighboring genes	1.84458e-06	De-facto noncognate
MAML2	COREAD	central gene	2.0897e-06	De-facto noncognate
MAML2	HNSC	neighboring genes	4.07769e-06	De-facto noncognate
MAML2	HNSC	central gene	1.92481e-06	De-facto noncognate
MAML2	LUAD	neighboring genes	6.2331e-06	De-facto noncognate
MAML2	LUAD	central gene	2.64801e-06	De-facto noncognate
MAP2K1	BLCA	neighboring genes	6.30566e-06	De-facto noncognate
MAP2K1	BLCA	central gene	2.49317e-06	De-facto noncognate
MAP2K1	LUAD	neighboring genes	3.50385e-06	De-facto noncognate
MAP2K1	LUAD	central gene	2.77074e-06	De-facto noncognate
MAP2K2	BLCA	neighboring genes	5.00052e-06	De-facto noncognate
MAP2K2	BLCA	central gene	7.24194e-06	De-facto noncognate
MAP2K2	COREAD	neighboring genes	2.23662e-06	De-facto noncognate
MAP2K2	COREAD	central gene	3.57261e-06	De-facto noncognate
MAP2K2	LUAD	neighboring genes	2.44519e-06	De-facto noncognate
MAP2K2	LUAD	central gene	3.01808e-06	De-facto noncognate
MAP2K4	COREAD	neighboring genes	2.11084e-06	De-facto cognate
MAP2K4	COREAD	central gene	1.19103e-05	De-facto cognate
MAP2K4	LUAD	neighboring genes	5.09486e-06	De-facto noncognate
MAP2K4	LUAD	central gene	5.52405e-06	De-facto noncognate
MAP2K7	BLCA	neighboring genes	5.66543e-06	De-facto noncognate
MAP2K7	BLCA	central gene	3.95267e-06	De-facto noncognate
MAP2K7	COREAD	neighboring genes	2.73412e-06	De-facto cognate
MAP2K7	COREAD	central gene	1.23496e-05	De-facto cognate
MAP2K7	HNSC	neighboring genes	3.71602e-06	De-facto noncognate
MAP2K7	HNSC	central gene	9.57909e-07	De-facto noncognate
MAP2K7	LUAD	neighboring genes	3.76402e-06	De-facto cognate
MAP2K7	LUAD	central gene	7.32123e-06	De-facto cognate
MAP3K1	BLCA	neighboring genes	6.50275e-06	De-facto noncognate
MAP3K1	BLCA	central gene	4.56031e-06	De-facto noncognate
MAP3K1	HNSC	neighboring genes	1.96988e-06	De-facto noncognate
MAP3K1	HNSC	central gene	2.71268e-06	De-facto noncognate
MAP3K1	LUAD	neighboring genes	3.31225e-06	De-facto noncognate
MAP3K1	LUAD	central gene	3.22511e-06	De-facto noncognate
MAPK1	BLCA	neighboring genes	6.46047e-06	De-facto noncognate
MAPK1	BLCA	central gene	3.48466e-06	De-facto noncognate
MAPK1	COREAD	neighboring genes	1.27483e-06	De-facto noncognate
MAPK1	COREAD	central gene	1.71906e-06	De-facto noncognate
MAPK1	HNSC	neighboring genes	3.44445e-06	De-facto cognate
MAPK1	HNSC	central gene	1.26673e-05	De-facto cognate
MAPK1	LUAD	neighboring genes	2.87189e-06	De-facto noncognate
MAPK1	LUAD	central gene	5.80893e-06	De-facto noncognate
MAX	BLCA	neighboring genes	6.25055e-06	De-facto noncognate
MAX	BLCA	central gene	3.63922e-06	De-facto noncognate
MAX	HNSC	neighboring genes	3.48401e-06	De-facto noncognate
MAX	HNSC	central gene	2.64584e-06	De-facto noncognate
MAX	LUAD	neighboring genes	4.4573e-06	De-facto cognate
MAX	LUAD	central gene	2.42663e-05	De-facto cognate
MB21D2	BLCA	neighboring genes	1.0973e-05	De-facto noncognate
MB21D2	BLCA	central gene	1.02925e-05	De-facto noncognate
MB21D2	HNSC	neighboring genes	7.97773e-06	De-facto noncognate
MB21D2	HNSC	central gene	1.02892e-05	De-facto noncognate
MBD6	BLCA	neighboring genes	5.974e-06	De-facto cognate
MBD6	BLCA	central gene	1.11932e-05	De-facto cognate
MBD6	LUAD	neighboring genes	4.29195e-06	De-facto noncognate
MBD6	LUAD	central gene	1.30941e-06	De-facto noncognate
MDM2	BLCA	neighboring genes	7.7632e-06	De-facto noncognate
MDM2	BLCA	central gene	5.44511e-06	De-facto noncognate
MDM2	COREAD	neighboring genes	1.86017e-06	De-facto noncognate
MDM2	COREAD	central gene	2.68619e-06	De-facto noncognate
MDM2	HNSC	neighboring genes	4.19277e-06	De-facto noncognate
MDM2	HNSC	central gene	1.97939e-06	De-facto noncognate
MDM2	LUAD	neighboring genes	4.6835e-06	De-facto noncognate
MDM2	LUAD	central gene	3.02567e-06	De-facto noncognate
MEN1	BLCA	neighboring genes	5.7734e-06	De-facto noncognate
MEN1	BLCA	central gene	3.85489e-06	De-facto noncognate
MEN1	HNSC	neighboring genes	2.62341e-06	De-facto noncognate
MEN1	HNSC	central gene	1.40132e-06	De-facto noncognate
MEN1	LUAD	neighboring genes	3.92991e-06	De-facto noncognate
MEN1	LUAD	central gene	2.67755e-06	De-facto noncognate
MET	BLCA	neighboring genes	8.48439e-06	De-facto noncognate
MET	BLCA	central gene	9.42001e-06	De-facto noncognate
MET	COREAD	neighboring genes	2.09277e-06	De-facto noncognate
MET	COREAD	central gene	2.65548e-06	De-facto noncognate
MET	HNSC	neighboring genes	3.08422e-06	De-facto noncognate
MET	HNSC	central gene	1.95676e-06	De-facto noncognate
MGA	BLCA	neighboring genes	5.68374e-06	De-facto cognate
MGA	BLCA	central gene	9.17259e-06	De-facto cognate
MGA	COREAD	neighboring genes	1.59028e-06	De-facto noncognate
MGA	COREAD	central gene	2.4682e-06	De-facto noncognate
MGA	HNSC	neighboring genes	3.08379e-06	De-facto noncognate
MGA	HNSC	central gene	2.42501e-06	De-facto noncognate
MGA	LUAD	neighboring genes	3.58251e-06	De-facto cognate
MGA	LUAD	central gene	6.64142e-06	De-facto cognate
MGMT	BLCA	neighboring genes	3.58778e-06	De-facto noncognate
MGMT	BLCA	central gene	5.3404e-06	De-facto noncognate
MGMT	COREAD	neighboring genes	3.3432e-06	De-facto noncognate
MGMT	COREAD	central gene	3.9518e-06	De-facto noncognate
MGMT	HNSC	neighboring genes	4.63723e-06	De-facto cognate
MGMT	HNSC	central gene	1.94133e-05	De-facto cognate
MGMT	LUAD	neighboring genes	5.53781e-06	De-facto noncognate
MGMT	LUAD	central gene	5.93496e-06	De-facto noncognate
MLH1	BLCA	neighboring genes	6.46331e-06	De-facto noncognate
MLH1	BLCA	central gene	6.68539e-06	De-facto noncognate
MLH1	LUAD	neighboring genes	3.81246e-06	De-facto noncognate
MLH1	LUAD	central gene	4.12761e-06	De-facto noncognate
MPL	BLCA	neighboring genes	1.77002e-06	De-facto noncognate
MPL	BLCA	central gene	3.11216e-06	De-facto noncognate
MPL	COREAD	neighboring genes	4.51649e-07	De-facto noncognate
MPL	COREAD	central gene	5.11765e-07	De-facto noncognate
MPL	HNSC	neighboring genes	1.86374e-06	De-facto noncognate
MPL	HNSC	central gene	2.26265e-06	De-facto noncognate
MPL	LUAD	neighboring genes	1.66185e-06	De-facto noncognate
MPL	LUAD	central gene	2.30577e-06	De-facto noncognate
MSH2	BLCA	neighboring genes	4.7943e-06	De-facto noncognate
MSH2	BLCA	central gene	6.66318e-06	De-facto noncognate
MSH2	HNSC	neighboring genes	4.06656e-06	De-facto noncognate
MSH2	HNSC	central gene	2.90661e-06	De-facto noncognate
MSH2	LUAD	neighboring genes	3.99605e-06	De-facto noncognate
MSH2	LUAD	central gene	3.70251e-06	De-facto noncognate
MSH6	BLCA	neighboring genes	6.5361e-06	De-facto noncognate
MSH6	BLCA	central gene	5.76411e-06	De-facto noncognate
MSH6	COREAD	neighboring genes	2.687e-06	De-facto noncognate
MSH6	COREAD	central gene	2.62483e-06	De-facto noncognate
MSH6	HNSC	neighboring genes	4.75197e-06	De-facto noncognate
MSH6	HNSC	central gene	1.61181e-06	De-facto noncognate
MSH6	LUAD	neighboring genes	4.23721e-06	De-facto noncognate
MSH6	LUAD	central gene	3.44931e-06	De-facto noncognate
MTOR	COREAD	neighboring genes	1.89982e-06	De-facto cognate
MTOR	COREAD	central gene	8.66991e-06	De-facto cognate
MTOR	HNSC	neighboring genes	2.79986e-06	De-facto noncognate
MTOR	HNSC	central gene	2.12955e-06	De-facto noncognate
MTOR	LUAD	neighboring genes	3.82128e-06	De-facto noncognate
MTOR	LUAD	central gene	3.2552e-06	De-facto noncognate
MUC16	BLCA	neighboring genes	6.33812e-06	De-facto noncognate
MUC16	BLCA	central gene	4.6498e-06	De-facto noncognate
MUC16	COREAD	neighboring genes	6.14565e-06	De-facto noncognate
MUC16	COREAD	central gene	5.96401e-06	De-facto noncognate
MUC16	HNSC	neighboring genes	5.56142e-06	De-facto noncognate
MUC16	HNSC	central gene	4.73279e-06	De-facto noncognate
MUC16	LUAD	neighboring genes	1.05657e-05	De-facto noncognate
MUC16	LUAD	central gene	8.26798e-06	De-facto noncognate
MUTYH	BLCA	neighboring genes	1.29534e-06	De-facto noncognate
MUTYH	BLCA	central gene	0	De-facto noncognate
MUTYH	COREAD	neighboring genes	5.75116e-07	De-facto noncognate
MUTYH	COREAD	central gene	0	De-facto noncognate
MUTYH	HNSC	neighboring genes	1.13011e-06	De-facto noncognate
MUTYH	HNSC	central gene	0	De-facto noncognate
MUTYH	LUAD	neighboring genes	1.65549e-06	De-facto noncognate
MUTYH	LUAD	central gene	0	De-facto noncognate
MYB	BLCA	neighboring genes	5.6385e-06	De-facto noncognate
MYB	BLCA	central gene	7.52106e-06	De-facto noncognate
MYB	COREAD	neighboring genes	2.29784e-06	De-facto noncognate
MYB	COREAD	central gene	1.06009e-06	De-facto noncognate
MYB	HNSC	neighboring genes	3.20821e-06	De-facto noncognate
MYB	HNSC	central gene	3.90576e-06	De-facto noncognate
MYB	LUAD	neighboring genes	4.7678e-06	De-facto noncognate
MYB	LUAD	central gene	2.98515e-06	De-facto noncognate
MYC	BLCA	neighboring genes	1.04338e-05	De-facto noncognate
MYC	BLCA	central gene	2.72461e-06	De-facto noncognate
MYC	COREAD	neighboring genes	1.00965e-05	De-facto noncognate
MYC	COREAD	central gene	8.06465e-06	De-facto noncognate
MYC	HNSC	neighboring genes	9.62808e-06	De-facto noncognate
MYC	HNSC	central gene	8.91398e-06	De-facto noncognate
MYC	LUAD	neighboring genes	1.40484e-05	De-facto noncognate
MYC	LUAD	central gene	4.54193e-06	De-facto noncognate
MYCL	BLCA	neighboring genes	7.80845e-06	De-facto noncognate
MYCL	BLCA	central gene	9.32042e-06	De-facto noncognate
MYCL	COREAD	neighboring genes	2.80881e-06	De-facto noncognate
MYCL	COREAD	central gene	1.53265e-06	De-facto noncognate
MYCL	HNSC	neighboring genes	2.95678e-06	De-facto noncognate
MYCL	HNSC	central gene	4.51751e-06	De-facto noncognate
MYCL	LUAD	neighboring genes	3.70614e-06	De-facto noncognate
MYCL	LUAD	central gene	2.58952e-06	De-facto noncognate
MYD88	BLCA	neighboring genes	5.79678e-06	De-facto noncognate
MYD88	BLCA	central gene	5.52568e-06	De-facto noncognate
MYD88	COREAD	neighboring genes	2.38306e-06	De-facto noncognate
MYD88	COREAD	central gene	0	De-facto noncognate
MYD88	HNSC	neighboring genes	3.27791e-06	De-facto noncognate
MYD88	HNSC	central gene	0	De-facto noncognate
MYD88	LUAD	neighboring genes	2.86318e-06	De-facto noncognate
MYD88	LUAD	central gene	2.04696e-06	De-facto noncognate
MYH9	COREAD	neighboring genes	2.64048e-06	De-facto noncognate
MYH9	COREAD	central gene	3.07749e-06	De-facto noncognate
MYH9	LUAD	neighboring genes	3.39907e-06	De-facto noncognate
MYH9	LUAD	central gene	4.15971e-06	De-facto noncognate
MYOD1	BLCA	neighboring genes	1.16025e-06	De-facto noncognate
MYOD1	BLCA	central gene	1.81778e-06	De-facto noncognate
MYOD1	COREAD	neighboring genes	1.57403e-06	De-facto noncognate
MYOD1	COREAD	central gene	3.587e-06	De-facto noncognate
MYOD1	HNSC	neighboring genes	2.00341e-06	De-facto noncognate
MYOD1	HNSC	central gene	2.64317e-06	De-facto noncognate
MYOD1	LUAD	neighboring genes	3.86827e-06	De-facto noncognate
MYOD1	LUAD	central gene	4.04032e-06	De-facto noncognate
N4BP2	BLCA	neighboring genes	4.82922e-06	De-facto noncognate
N4BP2	BLCA	central gene	5.80184e-06	De-facto noncognate
N4BP2	COREAD	neighboring genes	3.04412e-06	De-facto noncognate
N4BP2	COREAD	central gene	1.85199e-06	De-facto noncognate
N4BP2	HNSC	neighboring genes	1.95056e-06	De-facto noncognate
N4BP2	HNSC	central gene	2.48126e-06	De-facto noncognate
N4BP2	LUAD	neighboring genes	3.727e-06	De-facto noncognate
N4BP2	LUAD	central gene	2.84461e-06	De-facto noncognate
NAB2	BLCA	neighboring genes	7.25871e-06	De-facto noncognate
NAB2	BLCA	central gene	3.2859e-06	De-facto noncognate
NAB2	COREAD	neighboring genes	2.69572e-06	De-facto noncognate
NAB2	COREAD	central gene	3.24201e-06	De-facto noncognate
NAB2	HNSC	neighboring genes	2.19395e-06	De-facto noncognate
NAB2	HNSC	central gene	7.9632e-07	De-facto noncognate
NAB2	LUAD	neighboring genes	4.80386e-06	De-facto noncognate
NAB2	LUAD	central gene	6.08622e-07	De-facto noncognate
NBN	BLCA	neighboring genes	7.95178e-06	De-facto noncognate
NBN	BLCA	central gene	6.49884e-06	De-facto noncognate
NBN	LUAD	neighboring genes	4.41854e-06	De-facto noncognate
NBN	LUAD	central gene	4.51399e-06	De-facto noncognate
NCOR1	COREAD	neighboring genes	4.44126e-06	De-facto noncognate
NCOR1	COREAD	central gene	1.85489e-06	De-facto noncognate
NCOR1	HNSC	neighboring genes	6.54532e-06	De-facto noncognate
NCOR1	HNSC	central gene	3.82712e-06	De-facto noncognate
NCOR1	LUAD	neighboring genes	2.50127e-06	De-facto noncognate
NCOR1	LUAD	central gene	3.76076e-06	De-facto noncognate
NCOR2	BLCA	neighboring genes	8.83147e-06	De-facto noncognate
NCOR2	BLCA	central gene	1.81412e-06	De-facto noncognate
NCOR2	COREAD	neighboring genes	7.5033e-06	De-facto noncognate
NCOR2	COREAD	central gene	1.78989e-06	De-facto noncognate
NCOR2	HNSC	neighboring genes	7.84762e-06	De-facto noncognate
NCOR2	HNSC	central gene	1.31893e-06	De-facto noncognate
NCOR2	LUAD	neighboring genes	1.22684e-05	De-facto noncognate
NCOR2	LUAD	central gene	8.06439e-06	De-facto noncognate
NDRG1	BLCA	neighboring genes	9.45762e-06	De-facto noncognate
NDRG1	BLCA	central gene	2.7042e-06	De-facto noncognate
NDRG1	COREAD	neighboring genes	4.33239e-06	De-facto noncognate
NDRG1	COREAD	central gene	3.3351e-06	De-facto noncognate
NDRG1	HNSC	neighboring genes	3.68358e-06	De-facto noncognate
NDRG1	HNSC	central gene	9.83023e-07	De-facto noncognate
NDRG1	LUAD	neighboring genes	8.07062e-06	De-facto noncognate
NDRG1	LUAD	central gene	2.25395e-06	De-facto noncognate
NF1	BLCA	neighboring genes	5.43574e-06	De-facto noncognate
NF1	BLCA	central gene	7.79584e-06	De-facto noncognate
NF1	COREAD	neighboring genes	3.06465e-06	De-facto noncognate
NF1	COREAD	central gene	1.76702e-06	De-facto noncognate
NF1	HNSC	neighboring genes	3.10512e-06	De-facto noncognate
NF1	HNSC	central gene	3.0637e-06	De-facto noncognate
NF1	LUAD	neighboring genes	3.02046e-06	De-facto cognate
NF1	LUAD	central gene	7.72716e-06	De-facto cognate
NF2	BLCA	neighboring genes	6.69875e-06	De-facto noncognate
NF2	BLCA	central gene	8.2991e-06	De-facto noncognate
NF2	HNSC	neighboring genes	2.37267e-06	De-facto noncognate
NF2	HNSC	central gene	3.01686e-06	De-facto noncognate
NF2	LUAD	neighboring genes	3.10189e-06	De-facto noncognate
NF2	LUAD	central gene	2.30577e-06	De-facto noncognate
NFATC2	COREAD	neighboring genes	5.24174e-06	De-facto noncognate
NFATC2	COREAD	central gene	8.40068e-06	De-facto noncognate
NFATC2	LUAD	neighboring genes	7.5911e-06	De-facto noncognate
NFATC2	LUAD	central gene	1.05978e-05	De-facto noncognate
NFE2L2	BLCA	neighboring genes	9.46333e-06	De-facto cognate
NFE2L2	BLCA	central gene	3.66922e-05	De-facto cognate
NFE2L2	HNSC	neighboring genes	2.88523e-06	De-facto cognate
NFE2L2	HNSC	central gene	2.37125e-05	De-facto cognate
NFE2L2	LUAD	neighboring genes	3.0533e-06	De-facto cognate
NFE2L2	LUAD	central gene	1.07607e-05	De-facto cognate
NOTCH1	COREAD	neighboring genes	2.22102e-06	De-facto noncognate
NOTCH1	COREAD	central gene	2.90056e-06	De-facto noncognate
NOTCH1	HNSC	neighboring genes	3.41352e-06	De-facto cognate
NOTCH1	HNSC	central gene	2.11877e-05	De-facto cognate
NPM1	COREAD	neighboring genes	2.2151e-06	De-facto noncognate
NPM1	COREAD	central gene	1.84745e-06	De-facto noncognate
NPM1	LUAD	neighboring genes	5.40594e-06	De-facto noncognate
NPM1	LUAD	central gene	5.20233e-06	De-facto noncognate
NR4A3	BLCA	neighboring genes	4.66861e-06	De-facto noncognate
NR4A3	BLCA	central gene	6.02019e-06	De-facto noncognate
NR4A3	HNSC	neighboring genes	3.08567e-06	De-facto noncognate
NR4A3	HNSC	central gene	4.37688e-06	De-facto noncognate
NRAS	BLCA	neighboring genes	5.86914e-06	De-facto cognate
NRAS	BLCA	central gene	2.58392e-05	De-facto cognate
NRAS	COREAD	neighboring genes	2.02676e-06	De-facto cognate
NRAS	COREAD	central gene	6.19142e-05	De-facto cognate
NRG1	COREAD	neighboring genes	3.55399e-06	De-facto cognate
NRG1	COREAD	central gene	1.20154e-05	De-facto cognate
NRG1	HNSC	neighboring genes	7.56557e-06	De-facto noncognate
NRG1	HNSC	central gene	1.96752e-06	De-facto noncognate
NRG1	LUAD	neighboring genes	1.26766e-05	De-facto noncognate
NRG1	LUAD	central gene	8.02006e-06	De-facto noncognate
NSD1	BLCA	neighboring genes	5.4992e-06	De-facto noncognate
NSD1	BLCA	central gene	5.6477e-06	De-facto noncognate
NSD1	COREAD	neighboring genes	3.18468e-06	De-facto noncognate
NSD1	COREAD	central gene	1.69591e-06	De-facto noncognate
NSD1	HNSC	neighboring genes	2.86821e-06	De-facto cognate
NSD1	HNSC	central gene	1.089e-05	De-facto cognate
NSD1	LUAD	neighboring genes	4.58359e-06	De-facto noncognate
NSD1	LUAD	central gene	4.63914e-06	De-facto noncognate
NTHL1	BLCA	neighboring genes	4.53168e-06	De-facto noncognate
NTHL1	BLCA	central gene	1.70288e-05	De-facto noncognate
NTHL1	COREAD	neighboring genes	2.13666e-06	De-facto noncognate
NTHL1	COREAD	central gene	0	De-facto noncognate
NTHL1	HNSC	neighboring genes	2.8865e-06	De-facto noncognate
NTHL1	HNSC	central gene	0	De-facto noncognate
NTHL1	LUAD	neighboring genes	3.25348e-06	De-facto noncognate
NTHL1	LUAD	central gene	9.46235e-06	De-facto noncognate
NTRK3	COREAD	neighboring genes	1.24833e-05	De-facto noncognate
NTRK3	COREAD	central gene	7.91738e-06	De-facto noncognate
NTRK3	HNSC	neighboring genes	6.13241e-06	De-facto noncognate
NTRK3	HNSC	central gene	7.55005e-06	De-facto noncognate
NUTM1	COREAD	neighboring genes	2.39296e-06	De-facto noncognate
NUTM1	COREAD	central gene	2.92918e-06	De-facto noncognate
PAFAH1B2	BLCA	neighboring genes	6.21604e-06	De-facto noncognate
PAFAH1B2	BLCA	central gene	4.9184e-06	De-facto noncognate
PAFAH1B2	COREAD	neighboring genes	2.43927e-06	De-facto noncognate
PAFAH1B2	COREAD	central gene	1.21318e-06	De-facto noncognate
PAFAH1B2	HNSC	neighboring genes	2.56777e-06	De-facto noncognate
PAFAH1B2	HNSC	central gene	0	De-facto noncognate
PAFAH1B2	LUAD	neighboring genes	4.86707e-06	De-facto noncognate
PAFAH1B2	LUAD	central gene	2.73299e-06	De-facto noncognate
PALB2	BLCA	neighboring genes	4.69181e-06	De-facto noncognate
PALB2	BLCA	central gene	0	De-facto noncognate
PALB2	COREAD	neighboring genes	2.23476e-06	De-facto noncognate
PALB2	COREAD	central gene	0	De-facto noncognate
PALB2	HNSC	neighboring genes	3.88161e-06	De-facto noncognate
PALB2	HNSC	central gene	8.15116e-06	De-facto noncognate
PALB2	LUAD	neighboring genes	4.58488e-06	De-facto noncognate
PALB2	LUAD	central gene	6.22987e-06	De-facto noncognate
PBRM1	COREAD	neighboring genes	1.9213e-06	De-facto noncognate
PBRM1	COREAD	central gene	2.58643e-06	De-facto noncognate
PBRM1	HNSC	neighboring genes	2.287e-06	De-facto noncognate
PBRM1	HNSC	central gene	3.5395e-06	De-facto noncognate
PBRM1	LUAD	neighboring genes	2.66352e-06	De-facto noncognate
PBRM1	LUAD	central gene	2.9133e-06	De-facto noncognate
PCBP1	BLCA	neighboring genes	4.14567e-06	De-facto cognate
PCBP1	BLCA	central gene	1.9493e-05	De-facto cognate
PCBP1	COREAD	neighboring genes	1.81791e-06	De-facto cognate
PCBP1	COREAD	central gene	3.17339e-05	De-facto cognate
PCBP1	HNSC	neighboring genes	2.90241e-06	De-facto noncognate
PCBP1	HNSC	central gene	2.83442e-06	De-facto noncognate
PCBP1	LUAD	neighboring genes	3.32744e-06	De-facto noncognate
PCBP1	LUAD	central gene	3.24949e-06	De-facto noncognate
PCCA	BLCA	neighboring genes	5.605e-06	De-facto noncognate
PCCA	BLCA	central gene	3.4219e-06	De-facto noncognate
PCCA	LUAD	neighboring genes	4.33324e-06	De-facto noncognate
PCCA	LUAD	central gene	3.32752e-06	De-facto noncognate
PDCD1LG2	HNSC	neighboring genes	2.36548e-06	De-facto noncognate
PDCD1LG2	HNSC	central gene	0	De-facto noncognate
PDCD1LG2	LUAD	neighboring genes	4.77808e-06	De-facto noncognate
PDCD1LG2	LUAD	central gene	3.4116e-06	De-facto noncognate
PDGFB	BLCA	neighboring genes	4.108e-06	De-facto noncognate
PDGFB	BLCA	central gene	5.09902e-06	De-facto noncognate
PDGFB	COREAD	neighboring genes	3.19747e-06	De-facto noncognate
PDGFB	COREAD	central gene	3.77319e-06	De-facto noncognate
PDGFB	HNSC	neighboring genes	4.38043e-06	De-facto noncognate
PDGFB	HNSC	central gene	1.85358e-06	De-facto noncognate
PDGFB	LUAD	neighboring genes	6.29005e-06	De-facto noncognate
PDGFB	LUAD	central gene	1.41668e-06	De-facto noncognate
PDGFRA	BLCA	neighboring genes	8.94329e-06	De-facto noncognate
PDGFRA	BLCA	central gene	8.89963e-06	De-facto noncognate
PDGFRA	HNSC	neighboring genes	6.14085e-06	De-facto noncognate
PDGFRA	HNSC	central gene	6.08973e-06	De-facto noncognate
PDGFRA	LUAD	neighboring genes	7.45424e-06	De-facto cognate
PDGFRA	LUAD	central gene	1.59993e-05	De-facto cognate
PHF6	COREAD	neighboring genes	2.09523e-06	De-facto noncognate
PHF6	COREAD	central gene	1.59155e-06	De-facto noncognate
PHF6	HNSC	neighboring genes	3.74953e-06	De-facto noncognate
PHF6	HNSC	central gene	2.34555e-06	De-facto noncognate
PHF6	LUAD	neighboring genes	5.22576e-06	De-facto noncognate
PHF6	LUAD	central gene	6.27441e-06	De-facto noncognate
PHOX2B	COREAD	neighboring genes	7.2514e-06	De-facto noncognate
PHOX2B	COREAD	central gene	1.09597e-05	De-facto noncognate
PHOX2B	LUAD	neighboring genes	8.16783e-06	De-facto noncognate
PHOX2B	LUAD	central gene	5.14364e-06	De-facto noncognate
PIK3CA	BLCA	neighboring genes	7.51275e-06	De-facto cognate
PIK3CA	BLCA	central gene	6.78592e-05	De-facto cognate
PIK3CA	COREAD	neighboring genes	2.79856e-06	De-facto cognate
PIK3CA	COREAD	central gene	5.32944e-05	De-facto cognate
PIK3CA	HNSC	neighboring genes	4.23586e-06	De-facto cognate
PIK3CA	HNSC	central gene	4.93359e-05	De-facto cognate
PIK3CA	LUAD	neighboring genes	5.8785e-06	De-facto cognate
PIK3CA	LUAD	central gene	1.47812e-05	De-facto cognate
PIK3CB	BLCA	neighboring genes	6.1634e-06	De-facto noncognate
PIK3CB	BLCA	central gene	5.89502e-06	De-facto noncognate
PIK3R1	BLCA	neighboring genes	3.01849e-06	De-facto noncognate
PIK3R1	BLCA	central gene	3.10547e-06	De-facto noncognate
PIK3R1	COREAD	neighboring genes	1.70181e-06	De-facto cognate
PIK3R1	COREAD	central gene	6.89398e-06	De-facto cognate
PIK3R1	LUAD	neighboring genes	5.99026e-06	De-facto noncognate
PIK3R1	LUAD	central gene	2.58841e-06	De-facto noncognate
PIM1	BLCA	neighboring genes	6.68539e-05	De-facto noncognate
PIM1	BLCA	central gene	3.69888e-06	De-facto noncognate
PLAG1	BLCA	neighboring genes	7.37133e-06	De-facto noncognate
PLAG1	BLCA	central gene	4.53531e-06	De-facto noncognate
PLAG1	COREAD	neighboring genes	1.36366e-06	De-facto cognate
PLAG1	COREAD	central gene	9.69526e-06	De-facto cognate
PLAG1	HNSC	neighboring genes	6.02911e-06	De-facto noncognate
PLAG1	HNSC	central gene	5.49554e-06	De-facto noncognate
PLCG1	HNSC	neighboring genes	2.63106e-06	De-facto noncognate
PLCG1	HNSC	central gene	3.50721e-06	De-facto noncognate
PLCG1	LUAD	neighboring genes	2.87272e-06	De-facto noncognate
PLCG1	LUAD	central gene	4.14265e-06	De-facto noncognate
PMS2	BLCA	neighboring genes	9.40249e-06	De-facto noncognate
PMS2	BLCA	central gene	6.86332e-06	De-facto noncognate
PMS2	COREAD	neighboring genes	3.6445e-06	De-facto noncognate
PMS2	COREAD	central gene	3.04724e-06	De-facto noncognate
PMS2	HNSC	neighboring genes	3.74349e-06	De-facto noncognate
PMS2	HNSC	central gene	2.49494e-06	De-facto noncognate
PMS2	LUAD	neighboring genes	5.22465e-06	De-facto noncognate
PMS2	LUAD	central gene	4.95784e-06	De-facto noncognate
POLD1	BLCA	neighboring genes	5.48783e-06	De-facto noncognate
POLD1	BLCA	central gene	5.02956e-06	De-facto noncognate
POLD1	COREAD	neighboring genes	3.01292e-06	De-facto noncognate
POLD1	COREAD	central gene	2.2055e-06	De-facto noncognate
POLD1	HNSC	neighboring genes	3.60373e-06	De-facto noncognate
POLD1	HNSC	central gene	2.84407e-06	De-facto noncognate
POLD1	LUAD	neighboring genes	3.3937e-06	De-facto noncognate
POLD1	LUAD	central gene	3.41582e-06	De-facto noncognate
POLG	BLCA	neighboring genes	5.92469e-06	De-facto noncognate
POLG	BLCA	central gene	2.816e-06	De-facto noncognate
POLG	HNSC	neighboring genes	2.54029e-06	De-facto noncognate
POLG	HNSC	central gene	4.09465e-06	De-facto noncognate
POLG	LUAD	neighboring genes	5.31809e-06	De-facto noncognate
POLG	LUAD	central gene	6.25903e-06	De-facto noncognate
POLR2A	BLCA	neighboring genes	4.30143e-06	De-facto noncognate
POLR2A	BLCA	central gene	3.12293e-06	De-facto noncognate
POLR2A	COREAD	neighboring genes	2.57468e-06	De-facto noncognate
POLR2A	COREAD	central gene	3.08122e-06	De-facto noncognate
POT1	COREAD	neighboring genes	6.38789e-06	De-facto noncognate
POT1	COREAD	central gene	5.08049e-06	De-facto noncognate
POT1	LUAD	neighboring genes	1.15123e-05	De-facto noncognate
POT1	LUAD	central gene	1.40463e-05	De-facto noncognate
POU2AF1	BLCA	neighboring genes	6.02545e-06	De-facto noncognate
POU2AF1	BLCA	central gene	5.21692e-06	De-facto noncognate
POU2AF1	HNSC	neighboring genes	2.12777e-06	De-facto noncognate
POU2AF1	HNSC	central gene	0	De-facto noncognate
POU5F1	BLCA	neighboring genes	6.18169e-06	De-facto noncognate
POU5F1	BLCA	central gene	0	De-facto noncognate
POU5F1	COREAD	neighboring genes	2.57307e-06	De-facto noncognate
POU5F1	COREAD	central gene	0	De-facto noncognate
POU5F1	HNSC	neighboring genes	2.42271e-06	De-facto noncognate
POU5F1	HNSC	central gene	0	De-facto noncognate
POU5F1	LUAD	neighboring genes	3.27395e-06	De-facto noncognate
POU5F1	LUAD	central gene	3.82099e-06	De-facto noncognate
PPM1D	BLCA	neighboring genes	4.33506e-06	De-facto noncognate
PPM1D	BLCA	central gene	6.10847e-06	De-facto noncognate
PPM1D	COREAD	neighboring genes	3.12562e-06	De-facto noncognate
PPM1D	COREAD	central gene	2.00896e-06	De-facto noncognate
PPM1D	HNSC	neighboring genes	2.9093e-06	De-facto noncognate
PPM1D	HNSC	central gene	4.44107e-06	De-facto noncognate
PPM1D	LUAD	neighboring genes	6.67067e-06	De-facto noncognate
PPM1D	LUAD	central gene	7.35427e-06	De-facto noncognate
PPP2R1A	BLCA	neighboring genes	8.83284e-06	De-facto noncognate
PPP2R1A	BLCA	central gene	7.05651e-06	De-facto noncognate
PPP2R1A	HNSC	neighboring genes	4.58698e-06	De-facto noncognate
PPP2R1A	HNSC	central gene	5.13032e-06	De-facto noncognate
PPP6C	BLCA	neighboring genes	1.24682e-05	De-facto noncognate
PPP6C	BLCA	central gene	7.30791e-06	De-facto noncognate
PPP6C	COREAD	neighboring genes	1.95708e-06	De-facto noncognate
PPP6C	COREAD	central gene	1.80257e-06	De-facto noncognate
PPP6C	HNSC	neighboring genes	2.88425e-06	De-facto noncognate
PPP6C	HNSC	central gene	2.65655e-06	De-facto noncognate
PRDM1	BLCA	neighboring genes	5.50694e-06	De-facto noncognate
PRDM1	BLCA	central gene	7.69564e-06	De-facto noncognate
PRDM1	LUAD	neighboring genes	4.25004e-06	De-facto noncognate
PRDM1	LUAD	central gene	3.32594e-06	De-facto noncognate
PRDM2	LUAD	neighboring genes	6.07358e-06	De-facto noncognate
PRDM2	LUAD	central gene	4.09949e-06	De-facto noncognate
PRF1	HNSC	neighboring genes	3.54863e-06	De-facto noncognate
PRF1	HNSC	central gene	4.6647e-06	De-facto noncognate
PRF1	LUAD	neighboring genes	8.33748e-06	De-facto noncognate
PRF1	LUAD	central gene	8.91299e-06	De-facto noncognate
PRKACA	BLCA	neighboring genes	5.68564e-06	De-facto noncognate
PRKACA	BLCA	central gene	9.67857e-06	De-facto noncognate
PRKACA	COREAD	neighboring genes	2.00346e-06	De-facto noncognate
PRKACA	COREAD	central gene	2.38732e-06	De-facto noncognate
PRKACA	HNSC	neighboring genes	3.44471e-06	De-facto noncognate
PRKACA	HNSC	central gene	3.51833e-06	De-facto noncognate
PRRX1	COREAD	neighboring genes	6.50969e-06	De-facto noncognate
PRRX1	COREAD	central gene	7.09539e-06	De-facto noncognate
PRRX1	LUAD	neighboring genes	1.09986e-05	De-facto noncognate
PRRX1	LUAD	central gene	1.33202e-05	De-facto noncognate
PTCH1	LUAD	neighboring genes	4.22676e-06	De-facto noncognate
PTCH1	LUAD	central gene	5.79614e-06	De-facto noncognate
PTEN	BLCA	neighboring genes	3.78656e-06	De-facto cognate
PTEN	BLCA	central gene	2.49547e-05	De-facto cognate
PTEN	COREAD	neighboring genes	1.30759e-06	De-facto cognate
PTEN	COREAD	central gene	1.64142e-05	De-facto cognate
PTEN	HNSC	neighboring genes	3.30355e-06	De-facto cognate
PTEN	HNSC	central gene	1.41111e-05	De-facto cognate
PTPN11	BLCA	neighboring genes	7.40511e-06	De-facto noncognate
PTPN11	BLCA	central gene	5.77002e-06	De-facto noncognate
PTPN11	COREAD	neighboring genes	2.03805e-06	De-facto cognate
PTPN11	COREAD	central gene	8.06501e-06	De-facto cognate
PTPN11	HNSC	neighboring genes	2.49353e-06	De-facto noncognate
PTPN11	HNSC	central gene	0	De-facto noncognate
PTPN13	BLCA	neighboring genes	6.03409e-06	De-facto noncognate
PTPN13	BLCA	central gene	6.25539e-06	De-facto noncognate
PTPN13	COREAD	neighboring genes	3.40199e-06	De-facto noncognate
PTPN13	COREAD	central gene	3.7031e-06	De-facto noncognate
PTPN13	HNSC	neighboring genes	2.50685e-06	De-facto noncognate
PTPN13	HNSC	central gene	3.27447e-06	De-facto noncognate
PTPN13	LUAD	neighboring genes	4.78992e-06	De-facto noncognate
PTPN13	LUAD	central gene	4.31013e-06	De-facto noncognate
PTPRB	BLCA	neighboring genes	7.38096e-06	De-facto noncognate
PTPRB	BLCA	central gene	6.58779e-06	De-facto noncognate
PTPRB	COREAD	neighboring genes	1.41602e-06	De-facto noncognate
PTPRB	COREAD	central gene	7.79975e-07	De-facto noncognate
PTPRD	COREAD	neighboring genes	7.16838e-06	De-facto noncognate
PTPRD	COREAD	central gene	3.91293e-06	De-facto noncognate
PTPRK	BLCA	neighboring genes	7.63505e-06	De-facto noncognate
PTPRK	BLCA	central gene	6.81313e-06	De-facto noncognate
PTPRK	HNSC	neighboring genes	5.55095e-06	De-facto noncognate
PTPRK	HNSC	central gene	2.78628e-06	De-facto noncognate
PTPRK	LUAD	neighboring genes	6.01028e-06	De-facto noncognate
PTPRK	LUAD	central gene	5.67875e-06	De-facto noncognate
PTPRT	BLCA	neighboring genes	7.24921e-06	De-facto noncognate
PTPRT	BLCA	central gene	9.52176e-06	De-facto noncognate
PTPRT	HNSC	neighboring genes	7.3786e-06	De-facto noncognate
PTPRT	HNSC	central gene	7.58195e-06	De-facto noncognate
PTPRT	LUAD	neighboring genes	1.61126e-05	De-facto noncognate
PTPRT	LUAD	central gene	2.4943e-05	De-facto noncognate
RAC1	BLCA	neighboring genes	4.15887e-06	De-facto noncognate
RAC1	BLCA	central gene	7.78041e-06	De-facto noncognate
RAC1	COREAD	neighboring genes	2.89336e-06	De-facto noncognate
RAC1	COREAD	central gene	1.91912e-06	De-facto noncognate
RAC1	HNSC	neighboring genes	3.10117e-06	De-facto cognate
RAC1	HNSC	central gene	3.95963e-05	De-facto cognate
RAC1	LUAD	neighboring genes	3.43679e-06	De-facto noncognate
RAC1	LUAD	central gene	0	De-facto noncognate
RAD17	BLCA	neighboring genes	4.38038e-06	De-facto noncognate
RAD17	BLCA	central gene	4.75954e-06	De-facto noncognate
RAD17	COREAD	neighboring genes	1.99471e-06	De-facto noncognate
RAD17	COREAD	central gene	5.86995e-07	De-facto noncognate
RAD17	HNSC	neighboring genes	1.95981e-06	De-facto noncognate
RAD17	HNSC	central gene	1.73017e-06	De-facto noncognate
RAD17	LUAD	neighboring genes	1.6851e-06	De-facto noncognate
RAD17	LUAD	central gene	2.64472e-06	De-facto noncognate
RAD21	LUAD	neighboring genes	6.42955e-06	De-facto noncognate
RAD21	LUAD	central gene	5.84071e-06	De-facto noncognate
RAD51B	BLCA	neighboring genes	5.14093e-06	De-facto noncognate
RAD51B	BLCA	central gene	0	De-facto noncognate
RAD51B	COREAD	neighboring genes	1.37676e-06	De-facto noncognate
RAD51B	COREAD	central gene	0	De-facto noncognate
RAD51B	HNSC	neighboring genes	2.93671e-06	De-facto noncognate
RAD51B	HNSC	central gene	0	De-facto noncognate
RAD51B	LUAD	neighboring genes	3.26474e-06	De-facto noncognate
RAD51B	LUAD	central gene	0	De-facto noncognate
RAF1	BLCA	neighboring genes	5.13192e-06	De-facto noncognate
RAF1	BLCA	central gene	5.77926e-06	De-facto noncognate
RAF1	HNSC	neighboring genes	2.72656e-06	De-facto noncognate
RAF1	HNSC	central gene	1.40057e-06	De-facto noncognate
RANBP2	BLCA	neighboring genes	7.99441e-06	De-facto noncognate
RANBP2	BLCA	central gene	7.28799e-06	De-facto noncognate
RANBP2	COREAD	neighboring genes	2.28326e-06	De-facto noncognate
RANBP2	COREAD	central gene	2.33696e-06	De-facto noncognate
RANBP2	HNSC	neighboring genes	2.75315e-06	De-facto noncognate
RANBP2	HNSC	central gene	2.64931e-06	De-facto noncognate
RANBP2	LUAD	neighboring genes	4.67603e-06	De-facto noncognate
RANBP2	LUAD	central gene	4.35343e-06	De-facto noncognate
RASA1	BLCA	neighboring genes	1.02077e-05	De-facto noncognate
RASA1	BLCA	central gene	5.69817e-06	De-facto noncognate
RASA1	LUAD	neighboring genes	3.78137e-06	De-facto noncognate
RASA1	LUAD	central gene	4.22171e-06	De-facto noncognate
RBBP6	COREAD	neighboring genes	1.77091e-06	De-facto noncognate
RBBP6	COREAD	central gene	1.84293e-06	De-facto noncognate
RBBP6	HNSC	neighboring genes	3.91482e-06	De-facto noncognate
RBBP6	HNSC	central gene	1.72838e-06	De-facto noncognate
RBBP6	LUAD	neighboring genes	4.82056e-06	De-facto noncognate
RBBP6	LUAD	central gene	5.66139e-06	De-facto noncognate
RBM10	BLCA	neighboring genes	2.80922e-06	De-facto cognate
RBM10	BLCA	central gene	1.44059e-05	De-facto cognate
RBM10	COREAD	neighboring genes	2.68771e-06	De-facto cognate
RBM10	COREAD	central gene	6.04071e-06	De-facto cognate
RBM10	HNSC	neighboring genes	2.10429e-06	De-facto noncognate
RBM10	HNSC	central gene	1.04736e-06	De-facto noncognate
RBM10	LUAD	neighboring genes	5.25061e-06	De-facto cognate
RBM10	LUAD	central gene	1.92117e-05	De-facto cognate
RBMX	BLCA	neighboring genes	5.25822e-06	De-facto noncognate
RBMX	BLCA	central gene	5.74858e-06	De-facto noncognate
RBMX	COREAD	neighboring genes	4.98845e-06	De-facto noncognate
RBMX	COREAD	central gene	4.96282e-06	De-facto noncognate
RBMX	HNSC	neighboring genes	5.09721e-06	De-facto noncognate
RBMX	HNSC	central gene	1.04485e-06	De-facto noncognate
RBMX	LUAD	neighboring genes	1.33355e-05	De-facto noncognate
RBMX	LUAD	central gene	7.18717e-06	De-facto noncognate
REL	BLCA	neighboring genes	6.99564e-06	De-facto noncognate
REL	BLCA	central gene	6.62232e-06	De-facto noncognate
REL	COREAD	neighboring genes	2.65469e-06	De-facto noncognate
REL	COREAD	central gene	2.33352e-06	De-facto noncognate
REL	HNSC	neighboring genes	3.12989e-06	De-facto noncognate
REL	HNSC	central gene	3.43904e-06	De-facto noncognate
REL	LUAD	neighboring genes	5.98038e-06	De-facto noncognate
REL	LUAD	central gene	2.62843e-06	De-facto noncognate
RET	BLCA	neighboring genes	5.91593e-06	De-facto noncognate
RET	BLCA	central gene	6.0023e-06	De-facto noncognate
RFWD3	BLCA	neighboring genes	4.47165e-06	De-facto noncognate
RFWD3	BLCA	central gene	6.48967e-06	De-facto noncognate
RFWD3	COREAD	neighboring genes	1.77702e-06	De-facto noncognate
RFWD3	COREAD	central gene	4.57356e-07	De-facto noncognate
RFWD3	HNSC	neighboring genes	3.25104e-06	De-facto noncognate
RFWD3	HNSC	central gene	3.37015e-06	De-facto noncognate
RFWD3	LUAD	neighboring genes	4.34831e-06	De-facto noncognate
RFWD3	LUAD	central gene	5.66672e-06	De-facto noncognate
RGPD3	BLCA	neighboring genes	7.9169e-06	De-facto noncognate
RGPD3	BLCA	central gene	4.70767e-06	De-facto noncognate
RGPD3	COREAD	neighboring genes	1.95279e-06	De-facto noncognate
RGPD3	COREAD	central gene	1.32708e-06	De-facto noncognate
RGPD3	LUAD	neighboring genes	5.86555e-06	De-facto noncognate
RGPD3	LUAD	central gene	4.11069e-06	De-facto noncognate
RHOA	BLCA	neighboring genes	7.89968e-06	De-facto cognate
RHOA	BLCA	central gene	9.3769e-05	De-facto cognate
RHOA	COREAD	neighboring genes	1.91395e-06	De-facto noncognate
RHOA	COREAD	central gene	1.92743e-06	De-facto noncognate
RHOA	HNSC	neighboring genes	2.20898e-06	De-facto cognate
RHOA	HNSC	central gene	3.69272e-05	De-facto cognate
RHOH	HNSC	neighboring genes	2.65033e-06	De-facto noncognate
RHOH	HNSC	central gene	0	De-facto noncognate
RMI2	BLCA	neighboring genes	5.5263e-06	De-facto noncognate
RMI2	BLCA	central gene	4.27738e-06	De-facto noncognate
RMI2	COREAD	neighboring genes	3.13013e-06	De-facto noncognate
RMI2	COREAD	central gene	0	De-facto noncognate
RMI2	HNSC	neighboring genes	3.72019e-06	De-facto noncognate
RMI2	HNSC	central gene	0	De-facto noncognate
RMI2	LUAD	neighboring genes	2.61585e-06	De-facto noncognate
RMI2	LUAD	central gene	0	De-facto noncognate
RNF43	BLCA	neighboring genes	7.2912e-06	De-facto noncognate
RNF43	BLCA	central gene	5.74597e-06	De-facto noncognate
RNF43	COREAD	neighboring genes	2.10385e-06	De-facto cognate
RNF43	COREAD	central gene	8.50382e-06	De-facto cognate
RNF43	HNSC	neighboring genes	3.20058e-06	De-facto noncognate
RNF43	HNSC	central gene	2.38715e-06	De-facto noncognate
RNF43	LUAD	neighboring genes	5.04524e-06	De-facto noncognate
RNF43	LUAD	central gene	4.56121e-06	De-facto noncognate
ROBO2	BLCA	neighboring genes	8.48309e-06	De-facto noncognate
ROBO2	BLCA	central gene	5.81338e-06	De-facto noncognate
ROBO2	COREAD	neighboring genes	7.82393e-06	De-facto noncognate
ROBO2	COREAD	central gene	8.60359e-06	De-facto noncognate
ROBO2	HNSC	neighboring genes	3.75413e-06	De-facto noncognate
ROBO2	HNSC	central gene	2.11326e-06	De-facto noncognate
ROS1	BLCA	neighboring genes	4.32867e-06	De-facto noncognate
ROS1	BLCA	central gene	6.72724e-06	De-facto noncognate
ROS1	LUAD	neighboring genes	4.81059e-06	De-facto noncognate
ROS1	LUAD	central gene	5.38287e-06	De-facto noncognate
RPL22	BLCA	neighboring genes	4.42849e-06	De-facto noncognate
RPL22	BLCA	central gene	0	De-facto noncognate
RPL22	COREAD	neighboring genes	2.34852e-06	De-facto noncognate
RPL22	COREAD	central gene	2.98816e-06	De-facto noncognate
RPL5	BLCA	neighboring genes	5.99686e-06	De-facto noncognate
RPL5	BLCA	central gene	2.20129e-06	De-facto noncognate
RPL5	COREAD	neighboring genes	1.62711e-06	De-facto noncognate
RPL5	COREAD	central gene	3.25782e-06	De-facto noncognate
RPL5	HNSC	neighboring genes	3.16094e-06	De-facto noncognate
RPL5	HNSC	central gene	4.80123e-06	De-facto noncognate
RPL5	LUAD	neighboring genes	2.99903e-06	De-facto noncognate
RPL5	LUAD	central gene	4.89273e-06	De-facto noncognate
RSPO2	COREAD	neighboring genes	6.73325e-06	De-facto noncognate
RSPO2	COREAD	central gene	1.06771e-05	De-facto noncognate
RSPO2	LUAD	neighboring genes	1.13763e-05	De-facto noncognate
RSPO2	LUAD	central gene	9.62119e-06	De-facto noncognate
RSPO3	COREAD	neighboring genes	3.65697e-06	De-facto noncognate
RSPO3	COREAD	central gene	4.54903e-06	De-facto noncognate
RSPO3	HNSC	neighboring genes	1.07789e-05	De-facto noncognate
RSPO3	HNSC	central gene	3.35207e-06	De-facto noncognate
RSPO3	LUAD	neighboring genes	5.14892e-06	De-facto noncognate
RSPO3	LUAD	central gene	3.84295e-06	De-facto noncognate
RUNX1	LUAD	neighboring genes	6.42268e-06	De-facto noncognate
RUNX1	LUAD	central gene	5.2396e-06	De-facto noncognate
SALL4	BLCA	neighboring genes	7.1762e-06	De-facto noncognate
SALL4	BLCA	central gene	7.32845e-06	De-facto noncognate
SALL4	COREAD	neighboring genes	5.42827e-06	De-facto noncognate
SALL4	COREAD	central gene	5.56197e-06	De-facto noncognate
SALL4	HNSC	neighboring genes	4.5217e-06	De-facto noncognate
SALL4	HNSC	central gene	2.04924e-06	De-facto noncognate
SALL4	LUAD	neighboring genes	7.70932e-06	De-facto noncognate
SALL4	LUAD	central gene	8.77085e-06	De-facto noncognate
SBDS	COREAD	neighboring genes	3.15567e-06	De-facto noncognate
SBDS	COREAD	central gene	3.46487e-06	De-facto noncognate
SBDS	LUAD	neighboring genes	3.23134e-06	De-facto noncognate
SBDS	LUAD	central gene	2.60184e-06	De-facto noncognate
SDHA	BLCA	neighboring genes	7.18634e-06	De-facto noncognate
SDHA	BLCA	central gene	7.26746e-06	De-facto noncognate
SDHA	COREAD	neighboring genes	4.6847e-06	De-facto noncognate
SDHA	COREAD	central gene	3.58519e-06	De-facto noncognate
SDHA	HNSC	neighboring genes	2.42576e-06	De-facto noncognate
SDHA	HNSC	central gene	1.32092e-06	De-facto noncognate
SDHA	LUAD	neighboring genes	6.27505e-06	De-facto noncognate
SDHA	LUAD	central gene	4.54307e-06	De-facto noncognate
SDHAF2	BLCA	neighboring genes	5.30933e-06	De-facto noncognate
SDHAF2	BLCA	central gene	0	De-facto noncognate
SDHAF2	COREAD	neighboring genes	2.18267e-06	De-facto noncognate
SDHAF2	COREAD	central gene	0	De-facto noncognate
SDHAF2	HNSC	neighboring genes	3.13094e-06	De-facto noncognate
SDHAF2	HNSC	central gene	0	De-facto noncognate
SDHAF2	LUAD	neighboring genes	4.45811e-06	De-facto noncognate
SDHAF2	LUAD	central gene	9.37392e-06	De-facto noncognate
SDHB	BLCA	neighboring genes	5.79937e-06	De-facto noncognate
SDHB	BLCA	central gene	8.36642e-06	De-facto noncognate
SDHB	HNSC	neighboring genes	2.37169e-06	De-facto noncognate
SDHB	HNSC	central gene	1.52067e-06	De-facto noncognate
SDHB	LUAD	neighboring genes	2.92041e-06	De-facto noncognate
SDHB	LUAD	central gene	1.16224e-06	De-facto noncognate
SDHC	BLCA	neighboring genes	1.87335e-06	De-facto noncognate
SDHC	BLCA	central gene	3.58858e-06	De-facto noncognate
SDHC	COREAD	neighboring genes	7.56132e-07	De-facto noncognate
SDHC	COREAD	central gene	0	De-facto noncognate
SDHC	HNSC	neighboring genes	1.4239e-06	De-facto noncognate
SDHC	HNSC	central gene	0	De-facto noncognate
SDHC	LUAD	neighboring genes	2.50776e-06	De-facto noncognate
SDHC	LUAD	central gene	0	De-facto noncognate
SDHD	HNSC	neighboring genes	2.48565e-06	De-facto noncognate
SDHD	HNSC	central gene	0	De-facto noncognate
SDHD	LUAD	neighboring genes	4.00308e-06	De-facto noncognate
SDHD	LUAD	central gene	4.70896e-06	De-facto noncognate
SETD1B	BLCA	neighboring genes	8.02882e-06	De-facto noncognate
SETD1B	BLCA	central gene	3.41414e-06	De-facto noncognate
SETD1B	COREAD	neighboring genes	2.71287e-06	De-facto noncognate
SETD1B	COREAD	central gene	3.53696e-06	De-facto noncognate
SETD1B	HNSC	neighboring genes	2.39886e-06	De-facto noncognate
SETD1B	HNSC	central gene	2.23397e-06	De-facto noncognate
SETD1B	LUAD	neighboring genes	4.46135e-06	De-facto noncognate
SETD1B	LUAD	central gene	3.79425e-06	De-facto noncognate
SETD2	COREAD	neighboring genes	2.01726e-06	De-facto noncognate
SETD2	COREAD	central gene	1.03213e-06	De-facto noncognate
SETD2	LUAD	neighboring genes	3.04572e-06	De-facto cognate
SETD2	LUAD	central gene	8.138e-06	De-facto cognate
SETDB1	BLCA	neighboring genes	7.22226e-06	De-facto noncognate
SETDB1	BLCA	central gene	8.1112e-06	De-facto noncognate
SETDB1	COREAD	neighboring genes	1.9434e-06	De-facto noncognate
SETDB1	COREAD	central gene	1.84681e-06	De-facto noncognate
SF3B1	BLCA	neighboring genes	5.63812e-06	De-facto noncognate
SF3B1	BLCA	central gene	0	De-facto noncognate
SF3B1	COREAD	neighboring genes	2.52855e-06	De-facto noncognate
SF3B1	COREAD	central gene	0	De-facto noncognate
SF3B1	HNSC	neighboring genes	4.09911e-06	De-facto noncognate
SF3B1	HNSC	central gene	0	De-facto noncognate
SF3B1	LUAD	neighboring genes	5.88609e-06	De-facto noncognate
SF3B1	LUAD	central gene	0	De-facto noncognate
SFPQ	BLCA	neighboring genes	7.3462e-06	De-facto noncognate
SFPQ	BLCA	central gene	1.50171e-05	De-facto noncognate
SFPQ	COREAD	neighboring genes	1.77346e-06	De-facto noncognate
SFPQ	COREAD	central gene	0	De-facto noncognate
SFPQ	HNSC	neighboring genes	3.12502e-06	De-facto noncognate
SFPQ	HNSC	central gene	2.18359e-06	De-facto noncognate
SFRP4	BLCA	neighboring genes	7.80685e-06	De-facto noncognate
SFRP4	BLCA	central gene	8.19734e-06	De-facto noncognate
SFRP4	COREAD	neighboring genes	5.77693e-06	De-facto noncognate
SFRP4	COREAD	central gene	7.27906e-06	De-facto noncognate
SFRP4	HNSC	neighboring genes	1.50004e-05	De-facto noncognate
SFRP4	HNSC	central gene	1.78792e-05	De-facto noncognate
SFRP4	LUAD	neighboring genes	9.60559e-06	De-facto noncognate
SFRP4	LUAD	central gene	6.37699e-06	De-facto noncognate
SGK1	BLCA	neighboring genes	9.66821e-06	De-facto noncognate
SGK1	BLCA	central gene	4.224e-06	De-facto noncognate
SGK1	COREAD	neighboring genes	2.86172e-06	De-facto noncognate
SGK1	COREAD	central gene	2.77838e-06	De-facto noncognate
SGK1	LUAD	neighboring genes	9.13292e-06	De-facto noncognate
SGK1	LUAD	central gene	7.82378e-07	De-facto noncognate
SIRPA	BLCA	neighboring genes	1.01281e-05	De-facto noncognate
SIRPA	BLCA	central gene	4.52678e-06	De-facto noncognate
SIRPA	COREAD	neighboring genes	2.49821e-06	De-facto noncognate
SIRPA	COREAD	central gene	2.79145e-06	De-facto noncognate
SIRPA	HNSC	neighboring genes	5.31807e-06	De-facto noncognate
SIRPA	HNSC	central gene	3.29112e-06	De-facto noncognate
SIRPA	LUAD	neighboring genes	9.0671e-06	De-facto noncognate
SIRPA	LUAD	central gene	1.13192e-05	De-facto noncognate
SIX1	BLCA	neighboring genes	8.40763e-06	De-facto noncognate
SIX1	BLCA	central gene	8.25168e-06	De-facto noncognate
SIX1	COREAD	neighboring genes	3.50956e-06	De-facto noncognate
SIX1	COREAD	central gene	3.05305e-06	De-facto noncognate
SIX1	HNSC	neighboring genes	2.82122e-06	De-facto noncognate
SIX1	HNSC	central gene	2.99963e-06	De-facto noncognate
SIX1	LUAD	neighboring genes	5.74996e-06	De-facto noncognate
SIX1	LUAD	central gene	6.87778e-06	De-facto noncognate
SIX2	BLCA	neighboring genes	6.01398e-06	De-facto noncognate
SIX2	BLCA	central gene	4.02914e-06	De-facto noncognate
SIX2	HNSC	neighboring genes	3.74775e-06	De-facto noncognate
SIX2	HNSC	central gene	2.92932e-06	De-facto noncognate
SIX2	LUAD	neighboring genes	8.59313e-06	De-facto noncognate
SIX2	LUAD	central gene	1.11943e-05	De-facto noncognate
SKI	BLCA	neighboring genes	5.08382e-06	De-facto noncognate
SKI	BLCA	central gene	7.99758e-07	De-facto noncognate
SKI	COREAD	neighboring genes	2.16373e-06	De-facto noncognate
SKI	COREAD	central gene	1.57815e-06	De-facto noncognate
SKI	LUAD	neighboring genes	3.93272e-06	De-facto noncognate
SKI	LUAD	central gene	4.44399e-06	De-facto noncognate
SLC34A2	BLCA	neighboring genes	6.63049e-06	De-facto noncognate
SLC34A2	BLCA	central gene	3.36921e-06	De-facto noncognate
SLC34A2	COREAD	neighboring genes	2.69374e-06	De-facto noncognate
SLC34A2	COREAD	central gene	4.15526e-06	De-facto noncognate
SMAD2	COREAD	neighboring genes	2.19328e-06	De-facto cognate
SMAD2	COREAD	central gene	1.71611e-05	De-facto cognate
SMAD3	COREAD	neighboring genes	2.50367e-06	De-facto cognate
SMAD3	COREAD	central gene	1.66703e-05	De-facto cognate
SMAD4	COREAD	neighboring genes	4.90889e-06	De-facto cognate
SMAD4	COREAD	central gene	6.64456e-05	De-facto cognate
SMAD4	LUAD	neighboring genes	9.39975e-06	De-facto cognate
[truncated: 507 more rows]

## Sheet: Fig.1d
HGNC	Cohort	MutationType	FullType	coef_corrected_log2
A1CF	BLCA	MissenseAndNonsense_inHS.Permissive	OG noncognate cancer types	0.62517
A1CF	BLCA	MissenseAndNonsense_outHS.Permissive	OG noncognate cancer types	-1.69241
A1CF	BLCA	MissenseAndNonsense	OG noncognate cancer types	3.88743e-10
A1CF	BLCA	Missense	OG noncognate cancer types	-5.57491e-11
A1CF	COREAD	MissenseAndNonsense_inHS.Permissive	OG noncognate cancer types	0.317706
A1CF	COREAD	MissenseAndNonsense_outHS.Permissive	OG noncognate cancer types	-0.442881
A1CF	COREAD	MissenseAndNonsense	OG noncognate cancer types	1.59761e-10
A1CF	COREAD	Missense	OG noncognate cancer types	0.319477
A1CF	COREAD_MSI	MissenseAndNonsense_inHS.Permissive	OG noncognate cancer types	0.861651
A1CF	COREAD_MSI	MissenseAndNonsense	OG noncognate cancer types	0.363411
A1CF	COREAD_MSI	Missense	OG noncognate cancer types	0.424066
A1CF	COREAD_POLE	MissenseAndNonsense_inHS.Permissive	OG noncognate cancer types	1.05413
A1CF	COREAD_POLE	MissenseAndNonsense	OG noncognate cancer types	0.606494
A1CF	COREAD_POLE	Missense	OG noncognate cancer types	1.66642e-12
A1CF	ESAD	MissenseAndNonsense_inHS.Permissive	OG noncognate cancer types	-1.05423
A1CF	ESAD	MissenseAndNonsense	OG noncognate cancer types	-1.73992
A1CF	ESAD	Missense	OG noncognate cancer types	-1.73992
A1CF	HNSC	MissenseAndNonsense_inHS.Permissive	OG noncognate cancer types	0.574446
A1CF	HNSC	MissenseAndNonsense_outHS.Permissive	OG noncognate cancer types	-1.00158
A1CF	HNSC	MissenseAndNonsense	OG noncognate cancer types	0.245516
A1CF	HNSC	Missense	OG noncognate cancer types	1.21327e-11
A1CF	LGG	MissenseAndNonsense	OG noncognate cancer types	0.423245
A1CF	LIHC	MissenseAndNonsense_inHS.Permissive	OG noncognate cancer types	4.10698e-11
A1CF	LIHC	MissenseAndNonsense_outHS.Permissive	OG noncognate cancer types	-1.02683
A1CF	LIHC	MissenseAndNonsense	OG noncognate cancer types	-0.315173
A1CF	LIHC	Missense	OG noncognate cancer types	-0.315173
A1CF	LUAD	MissenseAndNonsense_inHS.Permissive	OG noncognate cancer types	-0.442014
A1CF	LUAD	MissenseAndNonsense_outHS.Permissive	OG noncognate cancer types	-2.63073
A1CF	LUAD	MissenseAndNonsense	OG noncognate cancer types	-1.10443
A1CF	LUAD	Missense	OG noncognate cancer types	-1.12147
A1CF	NSCLC	MissenseAndNonsense_inHS.Permissive	OG noncognate cancer types	-0.352127
A1CF	NSCLC	MissenseAndNonsense_outHS.Permissive	OG noncognate cancer types	-1.02983
A1CF	NSCLC	MissenseAndNonsense	OG noncognate cancer types	-0.647931
A1CF	NSCLC	Missense	OG noncognate cancer types	-0.647931
A1CF	SKCA	MissenseAndNonsense_inHS.Permissive	OG noncognate cancer types	0.651842
A1CF	SKCA	MissenseAndNonsense	OG noncognate cancer types	1.09499e-10
A1CF	SKCA	Missense	OG noncognate cancer types	1.09499e-10
A1CF	SKCM	MissenseAndNonsense_inHS.Permissive	OG cognate cancer types	2.0025
A1CF	SKCM	MissenseAndNonsense_outHS.Permissive	OG cognate cancer types	-0.649712
A1CF	SKCM	MissenseAndNonsense	OG cognate cancer types	1.40371
A1CF	SKCM	Missense	OG cognate cancer types	1.38102
A1CF	SKCM	Nonsense	OG cognate cancer types	0.775713
A1CF	UCEC_POLE	MissenseAndNonsense_inHS.Permissive	OG noncognate cancer types	0.614439
A1CF	UCEC_POLE	MissenseAndNonsense_outHS.Permissive	OG noncognate cancer types	-3.37688
A1CF	UCEC_POLE	MissenseAndNonsense	OG noncognate cancer types	-1.01388e-13
A1CF	UCEC_POLE	Missense	OG noncognate cancer types	2.28084e-13
AARS	BLCA	MissenseAndNonsense_inHS.Permissive	Essential	0.500851
AARS	BLCA	MissenseAndNonsense_outHS.Permissive	Essential	-0.789164
AARS	BLCA	MissenseAndNonsense	Essential	-0.586185
AARS	BLCA	Missense	Essential	-0.457863
AARS	BRCA	MissenseAndNonsense_inHS.Permissive	Essential	0.971849
AARS	BRCA	MissenseAndNonsense_outHS.Permissive	Essential	-0.49218
AARS	BRCA	MissenseAndNonsense	Essential	-0.374426
AARS	BRCA	Missense	Essential	-0.378479
AARS	BRCA_HER2	MissenseAndNonsense_inHS.Permissive	Essential	3.20343e-16
AARS	BRCA_HER2	MissenseAndNonsense_outHS.Permissive	Essential	-1.0044e-10
AARS	BRCA_HER2	MissenseAndNonsense	Essential	-3.14919e-11
AARS	BRCA_HER2	Missense	Essential	-3.1493e-11
AARS	BRCA_Lum	MissenseAndNonsense_inHS.Permissive	Essential	0.67085
AARS	BRCA_Lum	MissenseAndNonsense_outHS.Permissive	Essential	1.4353e-11
AARS	BRCA_Lum	MissenseAndNonsense	Essential	0.198983
AARS	BRCA_Lum	Missense	Essential	0.198983
AARS	BRCA_tri-	MissenseAndNonsense_inHS.Permissive	Essential	2.41541
AARS	BRCA_tri-	MissenseAndNonsense_outHS.Permissive	Essential	0.401457
AARS	BRCA_tri-	MissenseAndNonsense	Essential	1.06385
AARS	BRCA_tri-	Missense	Essential	0.735375
AARS	CESC	MissenseAndNonsense_inHS.Permissive	Essential	3.23388
AARS	CESC	MissenseAndNonsense_outHS.Permissive	Essential	-0.49493
AARS	CESC	MissenseAndNonsense	Essential	0.751599
AARS	CESC	Missense	Essential	0.751599
AARS	CESC_MSI	MissenseAndNonsense	Essential	1.62514
AARS	CESC_MSI	Missense	Essential	1.62514
AARS	CESC_POLE	MissenseAndNonsense_inHS.Permissive	Essential	3.20343e-16
AARS	CESC_POLE	MissenseAndNonsense_outHS.Permissive	Essential	1.44193e-11
AARS	CESC_POLE	MissenseAndNonsense	Essential	1.62487e-11
AARS	CESC_POLE	Missense	Essential	1.62481e-11
AARS	COREAD	MissenseAndNonsense_inHS.Permissive	Essential	0.619856
AARS	COREAD	MissenseAndNonsense_outHS.Permissive	Essential	-0.536101
AARS	COREAD	MissenseAndNonsense	Essential	-0.215496
AARS	COREAD	Missense	Essential	-0.245591
AARS	COREAD_MSI	MissenseAndNonsense_inHS.Permissive	Essential	0.977831
AARS	COREAD_MSI	MissenseAndNonsense_outHS.Permissive	Essential	-0.392559
AARS	COREAD_MSI	MissenseAndNonsense	Essential	-0.1522
AARS	COREAD_MSI	Missense	Essential	1.19907e-11
AARS	COREAD_POLE	MissenseAndNonsense_inHS.Permissive	Essential	1.62358
AARS	COREAD_POLE	MissenseAndNonsense_outHS.Permissive	Essential	-0.298606
AARS	COREAD_POLE	MissenseAndNonsense	Essential	0.256953
AARS	COREAD_POLE	Missense	Essential	0.265051
AARS	ESAD	MissenseAndNonsense_inHS.Permissive	Essential	1.0376
AARS	ESAD	MissenseAndNonsense_outHS.Permissive	Essential	-1.41825
AARS	ESAD	MissenseAndNonsense	Essential	-0.491635
AARS	ESAD	Missense	Essential	-0.491635
AARS	ESAD_MSI	MissenseAndNonsense_outHS.Permissive	Essential	1.83851e-11
AARS	ESAD_MSI	MissenseAndNonsense	Essential	3.51416e-12
AARS	ESAD_MSI	Missense	Essential	3.5148e-12
AARS	ESCA	MissenseAndNonsense_inHS.Permissive	Essential	1.41634
AARS	ESCA	MissenseAndNonsense_outHS.Permissive	Essential	-5.00744e-12
AARS	ESCA	MissenseAndNonsense	Essential	0.533018
AARS	ESCA	Missense	Essential	0.624177
AARS	GBM	MissenseAndNonsense_inHS.Permissive	Essential	0.964276
AARS	GBM	MissenseAndNonsense_outHS.Permissive	Essential	0.496067
AARS	GBM	MissenseAndNonsense	Essential	0.401485
AARS	GBM	Missense	Essential	0.411564
AARS	HNSC	MissenseAndNonsense_inHS.Permissive	Essential	0.825649
AARS	HNSC	MissenseAndNonsense_outHS.Permissive	Essential	-1.20224
AARS	HNSC	MissenseAndNonsense	Essential	-0.666819
AARS	HNSC	Missense	Essential	-0.664873
AARS	Kidney	MissenseAndNonsense_inHS.Permissive	Essential	-9.61028e-16
AARS	Kidney	MissenseAndNonsense_outHS.Permissive	Essential	0.739249
AARS	Kidney	MissenseAndNonsense	Essential	0.340951
AARS	Kidney	Missense	Essential	0.340951
AARS	LGG	MissenseAndNonsense_inHS.Permissive	Essential	0.834874
AARS	LGG	MissenseAndNonsense_outHS.Permissive	Essential	-2.92391e-11
AARS	LGG	MissenseAndNonsense	Essential	0.300285
AARS	LGG	Missense	Essential	0.300285
AARS	LIHC	MissenseAndNonsense_inHS.Permissive	Essential	1.10007
AARS	LIHC	MissenseAndNonsense_outHS.Permissive	Essential	-0.491348
AARS	LIHC	MissenseAndNonsense	Essential	-4.16574e-12
AARS	LIHC	Missense	Essential	-7.74877e-12
AARS	LUAD	MissenseAndNonsense_inHS.Permissive	Essential	2.31745
AARS	LUAD	MissenseAndNonsense_outHS.Permissive	Essential	-1.52717
AARS	LUAD	MissenseAndNonsense	Essential	7.36564e-12
AARS	LUAD	Missense	Essential	4.84028e-11
AARS	LUSC	MissenseAndNonsense_inHS.Permissive	Essential	0.614136
AARS	LUSC	MissenseAndNonsense_outHS.Permissive	Essential	-0.760205
AARS	LUSC	MissenseAndNonsense	Essential	-0.399822
AARS	LUSC	Missense	Essential	-0.40134
AARS	MM	MissenseAndNonsense_inHS.Permissive	Essential	-6.40685e-16
AARS	MM	MissenseAndNonsense_outHS.Permissive	Essential	-1.40539e-10
AARS	MM	MissenseAndNonsense	Essential	-1.72733e-10
AARS	MM	Missense	Essential	1.87699e-10
AARS	NSCLC	MissenseAndNonsense_inHS.Permissive	Essential	1.05513
AARS	NSCLC	MissenseAndNonsense_outHS.Permissive	Essential	-0.491158
AARS	NSCLC	MissenseAndNonsense	Essential	-1.45806e-11
AARS	NSCLC	Missense	Essential	-1.45799e-11
AARS	OV	MissenseAndNonsense_outHS.Permissive	Essential	-3.20343e-16
AARS	OV	MissenseAndNonsense	Essential	-5.93114e-13
AARS	OV	Missense	Essential	-5.93595e-13
AARS	PAAD	MissenseAndNonsense_inHS.Permissive	Essential	0.893441
AARS	PAAD	MissenseAndNonsense_outHS.Permissive	Essential	-2.01423
AARS	PAAD	MissenseAndNonsense	Essential	-0.889487
AARS	PAAD	Missense	Essential	-0.875821
AARS	PBCA	MissenseAndNonsense_inHS.Permissive	Essential	0.958682
AARS	PBCA	MissenseAndNonsense_outHS.Permissive	Essential	-0.486771
AARS	PBCA	MissenseAndNonsense	Essential	-0.372706
AARS	PBCA	Missense	Essential	-3.1276e-11
AARS	PRAD	MissenseAndNonsense_inHS.Permissive	Essential	3.353
AARS	PRAD	MissenseAndNonsense_outHS.Permissive	Essential	-2.48915
AARS	PRAD	MissenseAndNonsense	Essential	9.49685e-11
AARS	PRAD	Missense	Essential	9.31813e-11
AARS	SCLC	MissenseAndNonsense_inHS.Permissive	Essential	3.20343e-16
AARS	SCLC	MissenseAndNonsense_outHS.Permissive	Essential	-0.809213
AARS	SCLC	MissenseAndNonsense	Essential	-0.818375
AARS	SCLC	Missense	Essential	-0.818375
AARS	SKCM	MissenseAndNonsense_inHS.Permissive	Essential	1.37281
AARS	SKCM	MissenseAndNonsense_outHS.Permissive	Essential	-0.349779
AARS	SKCM	MissenseAndNonsense	Essential	4.21026e-12
AARS	SKCM	Missense	Essential	0.191237
AARS	SKCM	Nonsense	Essential	-0.81315
AARS	STAD	MissenseAndNonsense_inHS.Permissive	Essential	-3.20343e-16
AARS	STAD	MissenseAndNonsense_outHS.Permissive	Essential	-1.39649
AARS	STAD	MissenseAndNonsense	Essential	-1.45591
AARS	STAD	Missense	Essential	-1.44553
AARS	STAD_MSI	MissenseAndNonsense_inHS.Permissive	Essential	1.78533
AARS	STAD_MSI	MissenseAndNonsense_outHS.Permissive	Essential	-0.656906
AARS	STAD_MSI	MissenseAndNonsense	Essential	1.53732e-12
AARS	STAD_MSI	Missense	Essential	-1.7529e-11
AARS	UCEC	MissenseAndNonsense_inHS.Permissive	Essential	0.975126
AARS	UCEC	MissenseAndNonsense_outHS.Permissive	Essential	2.42302e-10
AARS	UCEC	MissenseAndNonsense	Essential	0.389908
AARS	UCEC	Missense	Essential	0.389908
AARS	UCEC_MSI	MissenseAndNonsense_inHS.Permissive	Essential	0.840869
AARS	UCEC_MSI	MissenseAndNonsense_outHS.Permissive	Essential	-0.83198
AARS	UCEC_MSI	MissenseAndNonsense	Essential	-0.430441
AARS	UCEC_MSI	Missense	Essential	-0.563365
AARS	UCEC_MSI	Nonsense	Essential	0.595402
AARS	UCEC_POLE	MissenseAndNonsense_inHS.Permissive	Essential	1.54724
AARS	UCEC_POLE	MissenseAndNonsense_outHS.Permissive	Essential	-0.185478
AARS	UCEC_POLE	MissenseAndNonsense	Essential	0.404338
AARS	UCEC_POLE	Missense	Essential	0.579707
AARS	UCEC_POLE	Nonsense	Essential	-0.822859
ABCC3	ACC	MissenseAndNonsense	Random	2.65136
ABCC3	ACC	Missense	Random	2.65136
ABCC3	BCC	MissenseAndNonsense_inHS.Permissive	Random	1.6921
ABCC3	BCC	MissenseAndNonsense_outHS.Permissive	Random	-1.70344e-10
ABCC3	BCC	MissenseAndNonsense	Random	0.407802
ABCC3	BCC	Missense	Random	5.82031e-12
ABCC3	BLCA	MissenseAndNonsense_inHS.Permissive	Random	0.240119
ABCC3	BLCA	MissenseAndNonsense_outHS.Permissive	Random	-1.26755
ABCC3	BLCA	MissenseAndNonsense	Random	-0.626094
ABCC3	BLCA	Missense	Random	-0.626211
ABCC3	BRCA	MissenseAndNonsense_inHS.Permissive	Random	0.699711
ABCC3	BRCA	MissenseAndNonsense_outHS.Permissive	Random	-2.62005
ABCC3	BRCA	MissenseAndNonsense	Random	-0.63161
ABCC3	BRCA	Missense	Random	-0.631723
ABCC3	BRCA_HER2	MissenseAndNonsense_inHS.Permissive	Random	-3.86109e-12
ABCC3	BRCA_HER2	MissenseAndNonsense_outHS.Permissive	Random	-1.54743
ABCC3	BRCA_HER2	MissenseAndNonsense	Random	-1.1837
ABCC3	BRCA_HER2	Missense	Random	-1.1837
ABCC3	BRCA_Lum	MissenseAndNonsense_inHS.Permissive	Random	0.285714
ABCC3	BRCA_Lum	MissenseAndNonsense_outHS.Permissive	Random	-1.33985
ABCC3	BRCA_Lum	MissenseAndNonsense	Random	-0.627479
ABCC3	BRCA_Lum	Missense	Random	-0.839812
ABCC3	BRCA_Lum	Nonsense	Random	-9.61028e-16
ABCC3	BRCA_tri-	MissenseAndNonsense_inHS.Permissive	Random	0.618007
ABCC3	BRCA_tri-	MissenseAndNonsense_outHS.Permissive	Random	-6.58405e-11
ABCC3	BRCA_tri-	MissenseAndNonsense	Random	0.30365
ABCC3	BRCA_tri-	Missense	Random	-5.78907e-11
ABCC3	CESC	MissenseAndNonsense_inHS.Permissive	Random	0.548793
ABCC3	CESC	MissenseAndNonsense_outHS.Permissive	Random	-9.65993e-13
ABCC3	CESC	MissenseAndNonsense	Random	0.296849
ABCC3	CESC	Missense	Random	0.303091
ABCC3	CESC_MSI	MissenseAndNonsense_inHS.Permissive	Random	-1.60171e-16
ABCC3	CESC_MSI	MissenseAndNonsense_outHS.Permissive	Random	-0.788827
ABCC3	CESC_MSI	MissenseAndNonsense	Random	-0.808172
ABCC3	CESC_MSI	Missense	Random	-0.808172
ABCC3	CESC_POLE	MissenseAndNonsense_inHS.Permissive	Random	9.61028e-16
ABCC3	CESC_POLE	MissenseAndNonsense_outHS.Permissive	Random	-6.40685e-16
ABCC3	CESC_POLE	MissenseAndNonsense	Random	-0.806717
ABCC3	CESC_POLE	Missense	Random	-0.806717
ABCC3	COREAD	MissenseAndNonsense_inHS.Permissive	Random	-1.94812e-11
ABCC3	COREAD	MissenseAndNonsense_outHS.Permissive	Random	-0.439816
ABCC3	COREAD	MissenseAndNonsense	Random	-0.161723
ABCC3	COREAD	Missense	Random	-0.162144
ABCC3	COREAD_MSI	MissenseAndNonsense_inHS.Permissive	Random	1.34603
ABCC3	COREAD_MSI	MissenseAndNonsense_outHS.Permissive	Random	-1.09856
ABCC3	COREAD_MSI	MissenseAndNonsense	Random	0.288696
ABCC3	COREAD_MSI	Missense	Random	0.292635
ABCC3	COREAD_MSI	Nonsense	Random	-0.803817
ABCC3	COREAD_POLE	MissenseAndNonsense_inHS.Permissive	Random	0.702662
ABCC3	COREAD_POLE	MissenseAndNonsense_outHS.Permissive	Random	-0.887801
ABCC3	COREAD_POLE	MissenseAndNonsense	Random	-0.182859
ABCC3	COREAD_POLE	Missense	Random	-0.184078
ABCC3	ESAD	MissenseAndNonsense_inHS.Permissive	Random	0.508862
ABCC3	ESAD	MissenseAndNonsense_outHS.Permissive	Random	-1.45383
ABCC3	ESAD	MissenseAndNonsense	Random	-0.355568
ABCC3	ESAD	Missense	Random	-0.355429
ABCC3	ESAD_MSI	MissenseAndNonsense_inHS.Permissive	Random	-1.60171e-16
ABCC3	ESAD_MSI	MissenseAndNonsense_outHS.Permissive	Random	-3.20343e-16
ABCC3	ESAD_MSI	MissenseAndNonsense	Random	-0.819848
ABCC3	ESAD_MSI	Missense	Random	-0.819848
ABCC3	ESCA	MissenseAndNonsense_inHS.Permissive	Random	1.00927e-11
ABCC3	ESCA	MissenseAndNonsense_outHS.Permissive	Random	-4.25668e-10
ABCC3	ESCA	MissenseAndNonsense	Random	-0.290035
ABCC3	ESCA	Missense	Random	-0.291228
ABCC3	GBM	MissenseAndNonsense_inHS.Permissive	Random	1.37021
ABCC3	GBM	MissenseAndNonsense_outHS.Permissive	Random	-0.475874
ABCC3	GBM	MissenseAndNonsense	Random	0.254886
ABCC3	GBM	Missense	Random	0.262107
ABCC3	HCC	MissenseAndNonsense_inHS.Permissive	Random	6.40685e-16
ABCC3	HCC	MissenseAndNonsense_outHS.Permissive	Random	-0.815554
ABCC3	HCC	MissenseAndNonsense	Random	-1.38905
ABCC3	HCC	Missense	Random	-1.37648
ABCC3	HNSC	MissenseAndNonsense_inHS.Permissive	Random	-0.349542
ABCC3	HNSC	MissenseAndNonsense_outHS.Permissive	Random	-1.75857
ABCC3	HNSC	MissenseAndNonsense	Random	-1.27435
ABCC3	HNSC	Missense	Random	-1.26998
ABCC3	Kidney	MissenseAndNonsense_inHS.Permissive	Random	2.78089e-12
ABCC3	Kidney	MissenseAndNonsense_outHS.Permissive	Random	-0.282873
ABCC3	Kidney	MissenseAndNonsense	Random	-0.449552
ABCC3	Kidney	Missense	Random	-0.239492
ABCC3	LGG	MissenseAndNonsense_inHS.Permissive	Random	1.92454
ABCC3	LGG	MissenseAndNonsense_outHS.Permissive	Random	0.693993
ABCC3	LGG	MissenseAndNonsense	Random	1.14838
ABCC3	LGG	Missense	Random	0.960145
ABCC3	LICA	MissenseAndNonsense_inHS.Permissive	Random	1.635
ABCC3	LICA	MissenseAndNonsense_outHS.Permissive	Random	-0.82285
ABCC3	LICA	MissenseAndNonsense	Random	9.62354e-11
ABCC3	LICA	Missense	Random	9.62322e-11
ABCC3	LIHC	MissenseAndNonsense_inHS.Permissive	Random	0.992811
ABCC3	LIHC	MissenseAndNonsense_outHS.Permissive	Random	0.300604
ABCC3	LIHC	MissenseAndNonsense	Random	0.684768
ABCC3	LIHC	Missense	Random	0.695409
ABCC3	LMS	MissenseAndNonsense_inHS.Permissive	Random	0
ABCC3	LMS	MissenseAndNonsense_outHS.Permissive	Random	-0.797422
ABCC3	LMS	MissenseAndNonsense	Random	-0.799846
ABCC3	LMS	Missense	Random	-0.799846
ABCC3	LUAD	MissenseAndNonsense_inHS.Permissive	Random	1.19827
ABCC3	LUAD	MissenseAndNonsense_outHS.Permissive	Random	-2.37662
ABCC3	LUAD	MissenseAndNonsense	Random	-0.321945
ABCC3	LUAD	Missense	Random	-0.222478
ABCC3	LUAD	Nonsense	Random	-0.80046
ABCC3	LUSC	MissenseAndNonsense_inHS.Permissive	Random	0.287843
ABCC3	LUSC	MissenseAndNonsense_outHS.Permissive	Random	-0.623764
ABCC3	LUSC	MissenseAndNonsense	Random	-0.280469
ABCC3	LUSC	Missense	Random	-0.28097
ABCC3	Lung	MissenseAndNonsense_inHS.Permissive	Random	2.21536
ABCC3	Lung	MissenseAndNonsense_outHS.Permissive	Random	-0.791163
ABCC3	Lung	MissenseAndNonsense	Random	0.538446
ABCC3	Lung	Missense	Random	1.45679e-11
ABCC3	MALY	MissenseAndNonsense_inHS.Permissive	Random	1.70492
ABCC3	MALY	MissenseAndNonsense_outHS.Permissive	Random	-0.789638
ABCC3	MALY	MissenseAndNonsense	Random	0.497753
ABCC3	MALY	Missense	Random	0.497753
ABCC3	MM	MissenseAndNonsense_inHS.Permissive	Random	1.01733
ABCC3	MM	MissenseAndNonsense_outHS.Permissive	Random	-1.95514
ABCC3	MM	MissenseAndNonsense	Random	-0.287644
ABCC3	MM	Missense	Random	-0.29017
ABCC3	NET	MissenseAndNonsense_inHS.Permissive	Random	1.33687
ABCC3	NET	MissenseAndNonsense_outHS.Permissive	Random	-0.477535
ABCC3	NET	MissenseAndNonsense	Random	0.312321
ABCC3	NET	Missense	Random	0.316362
ABCC3	NSCLC	MissenseAndNonsense_inHS.Permissive	Random	0.588606
ABCC3	NSCLC	MissenseAndNonsense_outHS.Permissive	Random	-1.4158
ABCC3	NSCLC	MissenseAndNonsense	Random	-0.358736
ABCC3	NSCLC	Missense	Random	-5.22982e-11
ABCC3	OV	MissenseAndNonsense_inHS.Permissive	Random	1.62491
ABCC3	OV	MissenseAndNonsense_outHS.Permissive	Random	-0.811273
ABCC3	OV	MissenseAndNonsense	Random	4.07245e-11
ABCC3	OV	Missense	Random	2.74693e-10
ABCC3	PAAD	MissenseAndNonsense_inHS.Permissive	Random	0.392783
ABCC3	PAAD	MissenseAndNonsense_outHS.Permissive	Random	-0.863977
ABCC3	PAAD	MissenseAndNonsense	Random	-0.239375
ABCC3	PAAD	Missense	Random	-0.240786
ABCC3	PBCA	MissenseAndNonsense_inHS.Permissive	Random	1.00632
ABCC3	PBCA	MissenseAndNonsense_outHS.Permissive	Random	-0.475099
ABCC3	PBCA	MissenseAndNonsense	Random	3.82345e-11
ABCC3	PBCA	Missense	Random	0.295374
ABCC3	PRAD	MissenseAndNonsense_inHS.Permissive	Random	0.607945
ABCC3	PRAD	MissenseAndNonsense_outHS.Permissive	Random	-2.54675
ABCC3	PRAD	MissenseAndNonsense	Random	-0.389164
ABCC3	PRAD	Missense	Random	-0.390895
ABCC3	SARC	MissenseAndNonsense_inHS.Permissive	Random	1.53704
ABCC3	SARC	MissenseAndNonsense_outHS.Permissive	Random	-0.80565
ABCC3	SARC	MissenseAndNonsense	Random	0.399248
ABCC3	SARC	Missense	Random	0.407868
ABCC3	SARC_UNDIFF	MissenseAndNonsense_inHS.Permissive	Random	9.61028e-16
ABCC3	SARC_UNDIFF	MissenseAndNonsense_outHS.Permissive	Random	-0.790921
ABCC3	SARC_UNDIFF	MissenseAndNonsense	Random	-0.804057
ABCC3	SARC_UNDIFF	Missense	Random	-0.798724
ABCC3	SCLC	MissenseAndNonsense_inHS.Permissive	Random	0.89036
ABCC3	SCLC	MissenseAndNonsense_outHS.Permissive	Random	-0.787667
ABCC3	SCLC	MissenseAndNonsense	Random	-1.28137e-15
ABCC3	SCLC	Missense	Random	-5.7772e-11
ABCC3	SKCA	MissenseAndNonsense_inHS.Permissive	Random	2.10198
ABCC3	SKCA	MissenseAndNonsense_outHS.Permissive	Random	-0.475758
ABCC3	SKCA	MissenseAndNonsense	Random	0.838353
ABCC3	SKCA	Missense	Random	0.86128
ABCC3	SKCM	MissenseAndNonsense_inHS.Permissive	Random	2.00018
ABCC3	SKCM	MissenseAndNonsense_outHS.Permissive	Random	-0.614818
ABCC3	SKCM	MissenseAndNonsense	Random	0.689987
ABCC3	SKCM	Missense	Random	0.657492
ABCC3	SKCM	Nonsense	Random	1.37354
ABCC3	STAD	MissenseAndNonsense_inHS.Permissive	Random	1.01273
ABCC3	STAD	MissenseAndNonsense_outHS.Permissive	Random	-0.477583
ABCC3	STAD	MissenseAndNonsense	Random	8.13017e-11
ABCC3	STAD	Missense	Random	8.57945e-11
ABCC3	STAD_MSI	MissenseAndNonsense_inHS.Permissive	Random	0.495741
ABCC3	STAD_MSI	MissenseAndNonsense_outHS.Permissive	Random	-1.69856
ABCC3	STAD_MSI	MissenseAndNonsense	Random	-0.30965
ABCC3	STAD_MSI	Missense	Random	-0.34282
ABCC3	Small_intestine	MissenseAndNonsense_inHS.Permissive	Random	-6.40685e-16
ABCC3	Small_intestine	MissenseAndNonsense_outHS.Permissive	Random	0.857211
ABCC3	Small_intestine	MissenseAndNonsense	Random	3.44685e-11
ABCC3	Small_intestine	Missense	Random	3.44685e-11
ABCC3	THCA	MissenseAndNonsense_inHS.Permissive	Random	1.03485
ABCC3	THCA	MissenseAndNonsense_outHS.Permissive	Random	-0.806105
ABCC3	THCA	MissenseAndNonsense	Random	-5.10306e-13
ABCC3	THCA	Missense	Random	6.59906e-14
ABCC3	UC	MissenseAndNonsense_inHS.Permissive	Random	3.20343e-16
ABCC3	UC	MissenseAndNonsense_outHS.Permissive	Random	-8.31922e-11
ABCC3	UC	MissenseAndNonsense	Random	-5.07208e-11
ABCC3	UC	Missense	Random	1.98183e-11
ABCC3	UCEC	MissenseAndNonsense_inHS.Permissive	Random	0.504769
ABCC3	UCEC	MissenseAndNonsense_outHS.Permissive	Random	-1.94609
ABCC3	UCEC	MissenseAndNonsense	Random	-0.649666
ABCC3	UCEC	Missense	Random	-0.648866
ABCC3	UCEC_MSI	MissenseAndNonsense_inHS.Permissive	Random	1.46027
ABCC3	UCEC_MSI	MissenseAndNonsense_outHS.Permissive	Random	-0.405187
ABCC3	UCEC_MSI	MissenseAndNonsense	Random	0.541833
ABCC3	UCEC_MSI	Missense	Random	0.495696
ABCC3	UCEC_POLE	MissenseAndNonsense_inHS.Permissive	Random	-1.72338e-09
ABCC3	UCEC_POLE	MissenseAndNonsense_outHS.Permissive	Random	-0.622556
ABCC3	UCEC_POLE	MissenseAndNonsense	Random	-0.565861
ABCC3	UCEC_POLE	Missense	Random	-0.443287
ABCC3	UCEC_POLE	Nonsense	Random	-0.822447
ABCE1	BLCA	MissenseAndNonsense_inHS.Permissive	Essential	2.05062
ABCE1	BLCA	MissenseAndNonsense_outHS.Permissive	Essential	-0.833628
ABCE1	BLCA	MissenseAndNonsense	Essential	7.08854e-12
ABCE1	BLCA	Missense	Essential	0.204239
ABCE1	BRCA_Lum	MissenseAndNonsense_inHS.Permissive	Essential	0.671643
ABCE1	BRCA_Lum	MissenseAndNonsense_outHS.Permissive	Essential	-0.321293
ABCE1	BRCA_Lum	MissenseAndNonsense	Essential	-1.08596e-13
ABCE1	BRCA_Lum	Missense	Essential	0.291203
ABCE1	COREAD	MissenseAndNonsense_inHS.Permissive	Essential	-1.30425e-10
ABCE1	COREAD	MissenseAndNonsense_outHS.Permissive	Essential	-3.5859e-11
ABCE1	COREAD	MissenseAndNonsense	Essential	5.77008e-11
ABCE1	COREAD	Missense	Essential	1.3904e-10
ABCE1	COREAD_MSI	MissenseAndNonsense_inHS.Permissive	Essential	1.37122
ABCE1	COREAD_MSI	MissenseAndNonsense_outHS.Permissive	Essential	-1.68452
ABCE1	COREAD_MSI	MissenseAndNonsense	Essential	-0.217427
ABCE1	COREAD_MSI	Missense	Essential	-0.242697
ABCE1	COREAD_POLE	MissenseAndNonsense_inHS.Permissive	Essential	0.420234
ABCE1	COREAD_POLE	MissenseAndNonsense_outHS.Permissive	Essential	-2.83042
ABCE1	COREAD_POLE	MissenseAndNonsense	Essential	-0.909207
ABCE1	COREAD_POLE	Missense	Essential	-0.907481
ABCE1	GBM	MissenseAndNonsense_inHS.Permissive	Essential	-6.40685e-16
ABCE1	GBM	MissenseAndNonsense_outHS.Permissive	Essential	-0.530674
ABCE1	GBM	MissenseAndNonsense	Essential	-0.546087
ABCE1	GBM	Missense	Essential	-0.543889
ABCE1	HNSC	MissenseAndNonsense_outHS.Permissive	Essential	0.492529
ABCE1	HNSC	MissenseAndNonsense	Essential	0.873609
ABCE1	HNSC	Missense	Essential	1.61565
ABCE1	Kidney	MissenseAndNonsense_inHS.Permissive	Essential	3.20343e-16
ABCE1	Kidney	MissenseAndNonsense_outHS.Permissive	Essential	-0.532176
ABCE1	Kidney	MissenseAndNonsense	Essential	-0.545566
ABCE1	Kidney	Missense	Essential	-0.545566
ABCE1	LGG	MissenseAndNonsense	Essential	-2.73733e-12
ABCE1	LUAD	MissenseAndNonsense_inHS.Permissive	Essential	0.722843
ABCE1	LUAD	MissenseAndNonsense_outHS.Permissive	Essential	-2.25978
ABCE1	LUAD	MissenseAndNonsense	Essential	-0.743453
ABCE1	LUAD	Missense	Essential	-0.40557
ABCE1	LUSC	MissenseAndNonsense_inHS.Permissive	Essential	-0.790887
ABCE1	LUSC	MissenseAndNonsense_outHS.Permissive	Essential	-1.01491
ABCE1	LUSC	MissenseAndNonsense	Essential	-1.04786
ABCE1	LUSC	Missense	Essential	-1.04786
ABCE1	MM	MissenseAndNonsense_inHS.Permissive	Essential	-0.835009
ABCE1	MM	MissenseAndNonsense_outHS.Permissive	Essential	-6.74465e-12
ABCE1	MM	MissenseAndNonsense	Essential	-0.420562
ABCE1	MM	Missense	Essential	-0.420562
ABCE1	PBCA	MissenseAndNonsense	Essential	0.454996
ABCE1	PRAD	MissenseAndNonsense_inHS.Permissive	Essential	4.24259
ABCE1	PRAD	MissenseAndNonsense	Essential	0.979168
ABCE1	PRAD	Missense	Essential	0.979168
ABCE1	SKCM	MissenseAndNonsense_inHS.Permissive	Essential	1.88542
ABCE1	SKCM	MissenseAndNonsense_outHS.Permissive	Essential	-1.23556
ABCE1	SKCM	MissenseAndNonsense	Essential	-0.115725
ABCE1	SKCM	Missense	Essential	5.08807e-11
ABCE1	SKCM	Nonsense	Essential	-0.349211
ABCE1	STAD	MissenseAndNonsense	Essential	-3.66938e-11
ABCE1	STAD	Missense	Essential	-3.66938e-11
ABCE1	STAD_MSI	MissenseAndNonsense_inHS.Permissive	Essential	0.822572
ABCE1	STAD_MSI	MissenseAndNonsense	Essential	-8.68418e-11
ABCE1	STAD_MSI	Missense	Essential	7.92175e-12
ABCE1	UCEC_MSI	MissenseAndNonsense_inHS.Permissive	Essential	1.26003
ABCE1	UCEC_MSI	MissenseAndNonsense_outHS.Permissive	Essential	-2.74188e-11
ABCE1	UCEC_MSI	MissenseAndNonsense	Essential	0.390613
ABCE1	UCEC_MSI	Missense	Essential	6.2422e-11
ABCE1	UCEC_MSI	Nonsense	Essential	1.57313
ABCE1	UCEC_POLE	MissenseAndNonsense_inHS.Permissive	Essential	0.848575
ABCE1	UCEC_POLE	MissenseAndNonsense_outHS.Permissive	Essential	-0.964291
ABCE1	UCEC_POLE	MissenseAndNonsense	Essential	-0.260294
ABCE1	UCEC_POLE	Missense	Essential	-0.156403
ABCE1	UCEC_POLE	Nonsense	Essential	-0.423774
ABHD17A	ANCA	MissenseAndNonsense_inHS.Permissive	Random	0
ABHD17A	ANCA	MissenseAndNonsense_outHS.Permissive	Random	-3.20343e-16
ABHD17A	ANCA	MissenseAndNonsense	Random	0
ABHD17A	ANCA	Missense	Random	0
ABHD17A	BCC	MissenseAndNonsense_inHS.Permissive	Random	-1.60171e-16
ABHD17A	BCC	MissenseAndNonsense_outHS.Permissive	Random	0
ABHD17A	BCC	MissenseAndNonsense	Random	-8.00857e-16
ABHD17A	BCC	Missense	Random	-8.00857e-16
ABHD17A	BLCA	MissenseAndNonsense_inHS.Permissive	Random	-0.780293
ABHD17A	BLCA	MissenseAndNonsense_outHS.Permissive	Random	-0.798391
ABHD17A	BLCA	MissenseAndNonsense	Random	-1.47393
ABHD17A	BLCA	Missense	Random	-1.40989
ABHD17A	BLCA	Nonsense	Random	3.20343e-16
ABHD17A	BRCA	MissenseAndNonsense_inHS.Permissive	Random	6.40685e-16
ABHD17A	BRCA	MissenseAndNonsense_outHS.Permissive	Random	-5.62426e-12
ABHD17A	BRCA	MissenseAndNonsense	Random	-3.32218e-11
ABHD17A	BRCA	Missense	Random	-1.91368e-11
ABHD17A	BRCA_HER2	MissenseAndNonsense_inHS.Permissive	Random	3.80316
ABHD17A	BRCA_HER2	MissenseAndNonsense_outHS.Permissive	Random	-3.20343e-16
ABHD17A	BRCA_HER2	MissenseAndNonsense	Random	2.47022
ABHD17A	BRCA_HER2	Missense	Random	2.58099
ABHD17A	BRCA_Lum	MissenseAndNonsense_inHS.Permissive	Random	1.90924e-13
ABHD17A	BRCA_Lum	MissenseAndNonsense_outHS.Permissive	Random	-0.77262
ABHD17A	BRCA_Lum	MissenseAndNonsense	Random	-7.29516e-12
ABHD17A	BRCA_Lum	Missense	Random	-5.04139e-12
ABHD17A	BRCA_tri-	MissenseAndNonsense_inHS.Permissive	Random	0
ABHD17A	BRCA_tri-	MissenseAndNonsense_outHS.Permissive	Random	0
ABHD17A	BRCA_tri-	MissenseAndNonsense	Random	-1.1212e-15
ABHD17A	BRCA_tri-	Missense	Random	-1.60171e-16
ABHD17A	BTCA	MissenseAndNonsense_inHS.Permissive	Random	3.20343e-16
ABHD17A	BTCA	MissenseAndNonsense_outHS.Permissive	Random	-8.00857e-16
ABHD17A	BTCA	MissenseAndNonsense	Random	3.20343e-16
ABHD17A	BTCA	Missense	Random	3.20343e-16
ABHD17A	CESC	MissenseAndNonsense_inHS.Permissive	Random	1.07037
ABHD17A	CESC	MissenseAndNonsense_outHS.Permissive	Random	-6.40685e-16
ABHD17A	CESC	MissenseAndNonsense	Random	0.819162
ABHD17A	CESC	Missense	Random	0.850641
ABHD17A	CESC_MSI	MissenseAndNonsense_inHS.Permissive	Random	1.97827
ABHD17A	CESC_MSI	MissenseAndNonsense_outHS.Permissive	Random	-1.60171e-16
ABHD17A	CESC_MSI	MissenseAndNonsense	Random	1.11788
ABHD17A	CESC_MSI	Missense	Random	1.17649
ABHD17A	COREAD	MissenseAndNonsense_inHS.Permissive	Random	6.7352e-12
ABHD17A	COREAD	MissenseAndNonsense_outHS.Permissive	Random	-0.804032
ABHD17A	COREAD	MissenseAndNonsense	Random	-0.467444
ABHD17A	COREAD	Missense	Random	-0.466896
ABHD17A	COREAD_MSI	MissenseAndNonsense_inHS.Permissive	Random	2.03512
ABHD17A	COREAD_MSI	MissenseAndNonsense_outHS.Permissive	Random	-0.465225
ABHD17A	COREAD_MSI	MissenseAndNonsense	Random	0.992932
ABHD17A	COREAD_MSI	Missense	Random	1.00669
ABHD17A	COREAD_POLE	MissenseAndNonsense_inHS.Permissive	Random	0.832012
ABHD17A	COREAD_POLE	MissenseAndNonsense_outHS.Permissive	Random	-3.20343e-16
ABHD17A	COREAD_POLE	MissenseAndNonsense	Random	-5.61777e-11
ABHD17A	COREAD_POLE	Missense	Random	2.62393e-12
ABHD17A	EOPC	MissenseAndNonsense_inHS.Permissive	Random	-6.40685e-16
ABHD17A	EOPC	MissenseAndNonsense_outHS.Permissive	Random	3.20343e-16
ABHD17A	EOPC	MissenseAndNonsense	Random	0
ABHD17A	EOPC	Missense	Random	0
ABHD17A	ESAD	MissenseAndNonsense_inHS.Permissive	Random	0.941347
ABHD17A	ESAD	MissenseAndNonsense_outHS.Permissive	Random	9.61028e-16
ABHD17A	ESAD	MissenseAndNonsense	Random	-7.7241e-12
ABHD17A	ESAD	Missense	Random	-7.7241e-12
ABHD17A	ESAD_MSI	MissenseAndNonsense_inHS.Permissive	Random	-3.20343e-16
ABHD17A	ESAD_MSI	MissenseAndNonsense_outHS.Permissive	Random	-3.20343e-16
ABHD17A	ESAD_MSI	MissenseAndNonsense	Random	0
ABHD17A	ESAD_MSI	Missense	Random	0
ABHD17A	ESAD_POLE	MissenseAndNonsense_inHS.Permissive	Random	1.89817
ABHD17A	ESAD_POLE	MissenseAndNonsense_outHS.Permissive	Random	6.40685e-16
ABHD17A	ESAD_POLE	MissenseAndNonsense	Random	1.09836
ABHD17A	ESAD_POLE	Missense	Random	1.09836
ABHD17A	ESCA	MissenseAndNonsense_inHS.Permissive	Random	-1.60171e-15
ABHD17A	ESCA	MissenseAndNonsense_outHS.Permissive	Random	-1.60171e-16
ABHD17A	ESCA	MissenseAndNonsense	Random	9.61028e-16
ABHD17A	ESCA	Missense	Random	-8.00857e-16
ABHD17A	GBM	MissenseAndNonsense_inHS.Permissive	Random	0
ABHD17A	GBM	MissenseAndNonsense_outHS.Permissive	Random	-1.60171e-16
ABHD17A	GBM	MissenseAndNonsense	Random	1.28137e-15
ABHD17A	GBM	Missense	Random	1.28137e-15
ABHD17A	HNSC	MissenseAndNonsense_inHS.Permissive	Random	1.07151e-11
ABHD17A	HNSC	MissenseAndNonsense_outHS.Permissive	Random	-5.43301e-13
ABHD17A	HNSC	MissenseAndNonsense	Random	-2.15483e-11
ABHD17A	HNSC	Missense	Random	7.27018e-12
ABHD17A	Kidney	MissenseAndNonsense_inHS.Permissive	Random	0.877059
ABHD17A	Kidney	MissenseAndNonsense_outHS.Permissive	Random	0
ABHD17A	Kidney	MissenseAndNonsense	Random	-4.47551e-12
ABHD17A	Kidney	Missense	Random	-2.29125e-12
ABHD17A	LGG	MissenseAndNonsense_inHS.Permissive	Random	0.916979
ABHD17A	LGG	MissenseAndNonsense_outHS.Permissive	Random	-1.60171e-15
ABHD17A	LGG	MissenseAndNonsense	Random	1.06994e-13
ABHD17A	LGG	Missense	Random	1.06994e-13
ABHD17A	LICA	MissenseAndNonsense_inHS.Permissive	Random	6.40685e-16
ABHD17A	LICA	MissenseAndNonsense_outHS.Permissive	Random	3.20343e-16
ABHD17A	LICA	MissenseAndNonsense	Random	-1.60171e-16
ABHD17A	LICA	Missense	Random	-1.60171e-16
ABHD17A	LIHC	MissenseAndNonsense_inHS.Permissive	Random	6.40685e-16
ABHD17A	LIHC	MissenseAndNonsense_outHS.Permissive	Random	0
ABHD17A	LIHC	MissenseAndNonsense	Random	-0.782528
ABHD17A	LIHC	Missense	Random	-0.784857
ABHD17A	LMS	MissenseAndNonsense_inHS.Permissive	Random	3.20343e-16
ABHD17A	LMS	MissenseAndNonsense_outHS.Permissive	Random	0
ABHD17A	LMS	MissenseAndNonsense	Random	0
ABHD17A	LMS	Missense	Random	0
ABHD17A	LUAD	MissenseAndNonsense_inHS.Permissive	Random	3.26333e-12
ABHD17A	LUAD	MissenseAndNonsense_outHS.Permissive	Random	-0.803646
ABHD17A	LUAD	MissenseAndNonsense	Random	-0.466319
ABHD17A	LUAD	Missense	Random	-0.465376
ABHD17A	LUAD	Nonsense	Random	-1.1212e-15
ABHD17A	LUSC	MissenseAndNonsense_inHS.Permissive	Random	2.81421e-12
ABHD17A	LUSC	MissenseAndNonsense_outHS.Permissive	Random	-0.78742
ABHD17A	LUSC	MissenseAndNonsense	Random	-0.464962
ABHD17A	LUSC	Missense	Random	-0.465128
ABHD17A	MALY	MissenseAndNonsense_inHS.Permissive	Random	9.61028e-16
ABHD17A	MALY	MissenseAndNonsense_outHS.Permissive	Random	6.40685e-16
ABHD17A	MALY	MissenseAndNonsense	Random	-6.40685e-16
ABHD17A	MALY	Missense	Random	1.60171e-15
ABHD17A	MM	MissenseAndNonsense_inHS.Permissive	Random	-6.40685e-16
ABHD17A	MM	MissenseAndNonsense_outHS.Permissive	Random	0
ABHD17A	MM	MissenseAndNonsense	Random	-0.777797
ABHD17A	MM	Missense	Random	-0.779118
ABHD17A	NET	MissenseAndNonsense_inHS.Permissive	Random	1.80123
ABHD17A	NET	MissenseAndNonsense_outHS.Permissive	Random	3.20343e-16
ABHD17A	NET	MissenseAndNonsense	Random	1.05251
ABHD17A	NET	Missense	Random	1.05251
ABHD17A	NSCLC	MissenseAndNonsense_inHS.Permissive	Random	1.12258
ABHD17A	NSCLC	MissenseAndNonsense_outHS.Permissive	Random	0
ABHD17A	NSCLC	MissenseAndNonsense	Random	0.814798
ABHD17A	NSCLC	Missense	Random	0.818882
ABHD17A	OV	MissenseAndNonsense_inHS.Permissive	Random	0
ABHD17A	OV	MissenseAndNonsense_outHS.Permissive	Random	-8.00857e-16
ABHD17A	OV	MissenseAndNonsense	Random	-3.20343e-16
ABHD17A	OV	Missense	Random	-3.20343e-16
ABHD17A	PAAD	MissenseAndNonsense_inHS.Permissive	Random	1.80994
ABHD17A	PAAD	MissenseAndNonsense_outHS.Permissive	Random	-0.792774
ABHD17A	PAAD	MissenseAndNonsense	Random	0.531699
ABHD17A	PAAD	Missense	Random	0.535539
ABHD17A	PBCA	MissenseAndNonsense_inHS.Permissive	Random	2.76106
ABHD17A	PBCA	MissenseAndNonsense_outHS.Permissive	Random	3.20343e-16
ABHD17A	PBCA	MissenseAndNonsense	Random	1.13233
ABHD17A	PBCA	Missense	Random	1.13233
ABHD17A	PRAD	MissenseAndNonsense_inHS.Permissive	Random	-0.79132
ABHD17A	PRAD	MissenseAndNonsense_outHS.Permissive	Random	-0.77319
ABHD17A	PRAD	MissenseAndNonsense	Random	-1.3193
ABHD17A	PRAD	Missense	Random	-0.823933
ABHD17A	SKCA	MissenseAndNonsense_inHS.Permissive	Random	1.27674
ABHD17A	SKCA	MissenseAndNonsense_outHS.Permissive	Random	-1.60171e-16
ABHD17A	SKCA	MissenseAndNonsense	Random	0.873424
ABHD17A	SKCA	Missense	Random	0.885777
ABHD17A	SKCM	MissenseAndNonsense_inHS.Permissive	Random	1.32578
ABHD17A	SKCM	MissenseAndNonsense_outHS.Permissive	Random	-0.82265
ABHD17A	SKCM	MissenseAndNonsense	Random	0.391534
ABHD17A	SKCM	Missense	Random	0.397914
ABHD17A	SKCM	Nonsense	Random	-1.60171e-16
ABHD17A	STAD	MissenseAndNonsense_inHS.Permissive	Random	0
ABHD17A	STAD	MissenseAndNonsense_outHS.Permissive	Random	6.40685e-16
ABHD17A	STAD	MissenseAndNonsense	Random	3.20343e-16
ABHD17A	STAD	Missense	Random	3.20343e-16
ABHD17A	STAD_MSI	MissenseAndNonsense_inHS.Permissive	Random	-0.779725
ABHD17A	STAD_MSI	MissenseAndNonsense_outHS.Permissive	Random	-8.00696e-13
ABHD17A	STAD_MSI	MissenseAndNonsense	Random	-0.468544
ABHD17A	STAD_MSI	Missense	Random	-0.470482
ABHD17A	Small_intestine	MissenseAndNonsense_inHS.Permissive	Random	1.81808
ABHD17A	Small_intestine	MissenseAndNonsense_outHS.Permissive	Random	3.20343e-16
ABHD17A	Small_intestine	MissenseAndNonsense	Random	1.10903
ABHD17A	Small_intestine	Missense	Random	1.10903
ABHD17A	UCEC	MissenseAndNonsense_inHS.Permissive	Random	-3.20343e-16
ABHD17A	UCEC	MissenseAndNonsense_outHS.Permissive	Random	-3.20343e-16
ABHD17A	UCEC	MissenseAndNonsense	Random	0
ABHD17A	UCEC	Missense	Random	0
ABHD17A	UCEC_MSI	MissenseAndNonsense_inHS.Permissive	Random	2.75715
ABHD17A	UCEC_MSI	MissenseAndNonsense_outHS.Permissive	Random	6.0737e-13
ABHD17A	UCEC_MSI	MissenseAndNonsense	Random	1.86941
ABHD17A	UCEC_MSI	Missense	Random	1.76832
ABHD17A	UCEC_POLE	MissenseAndNonsense_inHS.Permissive	Random	0.646165
ABHD17A	UCEC_POLE	MissenseAndNonsense_outHS.Permissive	Random	1.2389
ABHD17A	UCEC_POLE	MissenseAndNonsense	Random	1.17205
ABHD17A	UCEC_POLE	Missense	Random	1.20447
ACAD11	BLCA	MissenseAndNonsense_inHS.Permissive	Random	1.1251
ACAD11	BLCA	MissenseAndNonsense_outHS.Permissive	Random	-2.14421
ACAD11	BRCA_Lum	MissenseAndNonsense_outHS.Permissive	Random	-0.404051
ACAD11	CESC	MissenseAndNonsense_outHS.Permissive	Random	-0.423635
ACAD11	COREAD_POLE	MissenseAndNonsense_inHS.Permissive	Random	1.65439
ACAD11	HNSC	MissenseAndNonsense_inHS.Permissive	Random	1.75708
ACAD11	LUAD	MissenseAndNonsense_inHS.Permissive	Random	0.734864
ACAD11	LUAD	MissenseAndNonsense_outHS.Permissive	Random	-0.902301
ACAD11	LUSC	MissenseAndNonsense_outHS.Permissive	Random	-0.370062
ACAD11	SKCM	MissenseAndNonsense_inHS.Permissive	Random	0.84568
ACAD11	SKCM	MissenseAndNonsense_outHS.Permissive	Random	-2.1964
ACAD11	UCEC_MSI	MissenseAndNonsense_inHS.Permissive	Random	0.768646
ACAD11	UCEC_MSI	MissenseAndNonsense_outHS.Permissive	Random	0.231517
ACAD11	UCEC_POLE	MissenseAndNonsense_inHS.Permissive	Random	0.949937
ACAD11	UCEC_POLE	MissenseAndNonsense_outHS.Permissive	Random	-1.49094
ACADS	BLCA	MissenseAndNonsense_inHS.Permissive	Random	2.59247
ACADS	BLCA	MissenseAndNonsense_inHS.Trevino	Random	1.92206e-15
ACADS	BLCA	MissenseAndNonsense_outHS.Permissive	Random	-1.17629
ACADS	BLCA	MissenseAndNonsense	Random	0.37727
ACADS	BRCA	MissenseAndNonsense_inHS.Permissive	Random	-3.20343e-16
ACADS	BRCA	MissenseAndNonsense_inHS.Trevino	Random	-1.60171e-16
ACADS	BRCA	MissenseAndNonsense_outHS.Permissive	Random	-3.20343e-16
ACADS	BRCA	MissenseAndNonsense	Random	-0.486826
ACADS	BRCA_HER2	MissenseAndNonsense_inHS.Permissive	Random	0
ACADS	BRCA_HER2	MissenseAndNonsense_inHS.Trevino	Random	-3.20343e-16
ACADS	BRCA_HER2	MissenseAndNonsense_outHS.Permissive	Random	-8.00857e-16
ACADS	BRCA_HER2	MissenseAndNonsense	Random	3.20343e-16
ACADS	BRCA_Lum	MissenseAndNonsense_inHS.Permissive	Random	-0.778408
ACADS	BRCA_Lum	MissenseAndNonsense_inHS.Trevino	Random	-6.40685e-16
ACADS	BRCA_Lum	MissenseAndNonsense_outHS.Permissive	Random	-0.639005
ACADS	BRCA_Lum	MissenseAndNonsense	Random	-0.899142
ACADS	BRCA_tri-	MissenseAndNonsense_inHS.Permissive	Random	0
ACADS	BRCA_tri-	MissenseAndNonsense_inHS.Trevino	Random	0
ACADS	BRCA_tri-	MissenseAndNonsense_outHS.Permissive	Random	5.73093e-13
ACADS	BRCA_tri-	MissenseAndNonsense	Random	2.39296e-13
ACADS	CESC	MissenseAndNonsense_inHS.Permissive	Random	0.881201
ACADS	CESC	MissenseAndNonsense_inHS.Trevino	Random	-1.60171e-16
ACADS	CESC	MissenseAndNonsense_outHS.Permissive	Random	-0.803958
ACADS	CESC	MissenseAndNonsense	Random	-0.492683
ACADS	CESC_MSI	MissenseAndNonsense_inHS.Permissive	Random	-8.00857e-16
ACADS	CESC_MSI	MissenseAndNonsense_inHS.Trevino	Random	0
ACADS	CESC_MSI	MissenseAndNonsense_outHS.Permissive	Random	-0.815162
ACADS	CESC_MSI	MissenseAndNonsense	Random	-0.799896
ACADS	COREAD	MissenseAndNonsense_inHS.Permissive	Random	2.71269
ACADS	COREAD	MissenseAndNonsense_inHS.Trevino	Random	4.69478
ACADS	COREAD	MissenseAndNonsense_outHS.Permissive	Random	-0.476163
ACADS	COREAD	MissenseAndNonsense	Random	1.08234
ACADS	COREAD_MSI	MissenseAndNonsense_inHS.Permissive	Random	1.07859e-12
ACADS	COREAD_MSI	MissenseAndNonsense_inHS.Trevino	Random	3.20343e-16
ACADS	COREAD_MSI	MissenseAndNonsense_outHS.Permissive	Random	-0.285592
ACADS	COREAD_MSI	MissenseAndNonsense	Random	-1.58847e-11
ACADS	COREAD_POLE	MissenseAndNonsense_inHS.Permissive	Random	-1.13722e-14
ACADS	COREAD_POLE	MissenseAndNonsense_inHS.Trevino	Random	0
ACADS	COREAD_POLE	MissenseAndNonsense_outHS.Permissive	Random	-1.16651
ACADS	COREAD_POLE	MissenseAndNonsense	Random	-0.900082
ACADS	ESAD	MissenseAndNonsense_inHS.Permissive	Random	6.40685e-16
ACADS	ESAD	MissenseAndNonsense_inHS.Trevino	Random	3.20343e-16
ACADS	ESAD	MissenseAndNonsense_outHS.Permissive	Random	-0.797376
ACADS	ESAD	MissenseAndNonsense	Random	-0.792424
ACADS	ESAD_MSI	MissenseAndNonsense_inHS.Permissive	Random	3.20343e-16
ACADS	ESAD_MSI	MissenseAndNonsense_inHS.Trevino	Random	-1.60171e-16
ACADS	ESAD_MSI	MissenseAndNonsense_outHS.Permissive	Random	0
ACADS	ESAD_MSI	MissenseAndNonsense	Random	6.40685e-16
ACADS	ESCA	MissenseAndNonsense_inHS.Permissive	Random	0
ACADS	ESCA	MissenseAndNonsense_inHS.Trevino	Random	-1.92206e-15
ACADS	ESCA	MissenseAndNonsense_outHS.Permissive	Random	-4.80514e-16
ACADS	ESCA	MissenseAndNonsense	Random	-0.799727
ACADS	GBM	MissenseAndNonsense_inHS.Permissive	Random	3.56124
ACADS	GBM	MissenseAndNonsense_inHS.Trevino	Random	7.97817
ACADS	GBM	MissenseAndNonsense_outHS.Permissive	Random	-0.789672
ACADS	GBM	MissenseAndNonsense	Random	0.875319
ACADS	HNSC	MissenseAndNonsense_inHS.Permissive	Random	1.37484
ACADS	HNSC	MissenseAndNonsense_inHS.Trevino	Random	3.20343e-16
ACADS	HNSC	MissenseAndNonsense_outHS.Permissive	Random	-0.482857
ACADS	HNSC	MissenseAndNonsense	Random	0.293101
ACADS	Kidney	MissenseAndNonsense_inHS.Permissive	Random	1.73939
ACADS	Kidney	MissenseAndNonsense_inHS.Trevino	Random	8.69342
ACADS	Kidney	MissenseAndNonsense_outHS.Permissive	Random	1.72014e-11
ACADS	Kidney	MissenseAndNonsense	Random	0.692444
ACADS	LGG	MissenseAndNonsense_inHS.Permissive	Random	2.1582
ACADS	LGG	MissenseAndNonsense_inHS.Trevino	Random	5.45471
ACADS	LGG	MissenseAndNonsense_outHS.Permissive	Random	-1.35542
ACADS	LGG	MissenseAndNonsense	Random	0.34386
ACADS	LICA	MissenseAndNonsense_inHS.Permissive	Random	-1.60171e-16
ACADS	LICA	MissenseAndNonsense_inHS.Trevino	Random	-3.20343e-16
ACADS	LICA	MissenseAndNonsense_outHS.Permissive	Random	0
ACADS	LICA	MissenseAndNonsense	Random	-0.806707
ACADS	LIHC	MissenseAndNonsense_inHS.Permissive	Random	6.40685e-16
ACADS	LIHC	MissenseAndNonsense_inHS.Trevino	Random	0
ACADS	LIHC	MissenseAndNonsense_outHS.Permissive	Random	-0.795734
ACADS	LIHC	MissenseAndNonsense	Random	-0.834703
ACADS	LUAD	MissenseAndNonsense_inHS.Permissive	Random	-2.15366e-12
ACADS	LUAD	MissenseAndNonsense_inHS.Trevino	Random	-2.40257e-15
ACADS	LUAD	MissenseAndNonsense_outHS.Permissive	Random	-1.18952
ACADS	LUAD	MissenseAndNonsense	Random	-0.914996
ACADS	LUSC	MissenseAndNonsense_inHS.Permissive	Random	1.12169
ACADS	LUSC	MissenseAndNonsense_inHS.Trevino	Random	2.88308e-15
ACADS	LUSC	MissenseAndNonsense_outHS.Permissive	Random	-1.1736
ACADS	LUSC	MissenseAndNonsense	Random	-0.24067
ACADS	MALY	MissenseAndNonsense_inHS.Permissive	Random	1.37445
ACADS	MALY	MissenseAndNonsense_inHS.Trevino	Random	-6.40685e-16
ACADS	MALY	MissenseAndNonsense_outHS.Permissive	Random	-3.20343e-16
ACADS	MALY	MissenseAndNonsense	Random	1.47236e-11
ACADS	MM	MissenseAndNonsense_inHS.Permissive	Random	3.20343e-16
ACADS	MM	MissenseAndNonsense_inHS.Trevino	Random	0
ACADS	MM	MissenseAndNonsense_outHS.Permissive	Random	-0.817108
ACADS	MM	MissenseAndNonsense	Random	-1.11827
ACADS	NSCLC	MissenseAndNonsense_inHS.Permissive	Random	1.15534
ACADS	NSCLC	MissenseAndNonsense_inHS.Trevino	Random	-3.20343e-16
ACADS	NSCLC	MissenseAndNonsense_outHS.Permissive	Random	9.61028e-16
ACADS	NSCLC	MissenseAndNonsense	Random	0.551107
ACADS	OV	MissenseAndNonsense_inHS.Permissive	Random	5.28054
ACADS	OV	MissenseAndNonsense_inHS.Trevino	Random	6.40685e-16
ACADS	OV	MissenseAndNonsense_outHS.Permissive	Random	3.21336e-12
ACADS	OV	MissenseAndNonsense	Random	3.05466
ACADS	PAAD	MissenseAndNonsense_inHS.Permissive	Random	6.40685e-16
ACADS	PAAD	MissenseAndNonsense_inHS.Trevino	Random	3.20343e-16
ACADS	PAAD	MissenseAndNonsense_outHS.Permissive	Random	-0.830506
ACADS	PAAD	MissenseAndNonsense	Random	-1.39735
ACADS	PBCA	MissenseAndNonsense_inHS.Permissive	Random	2.50153
ACADS	PBCA	MissenseAndNonsense_inHS.Trevino	Random	6.71584
ACADS	PBCA	MissenseAndNonsense_outHS.Permissive	Random	0.59773
ACADS	PBCA	MissenseAndNonsense	Random	0.99934
ACADS	PRAD	MissenseAndNonsense_inHS.Permissive	Random	1.17645
ACADS	PRAD	MissenseAndNonsense_inHS.Trevino	Random	5.61873
ACADS	PRAD	MissenseAndNonsense_outHS.Permissive	Random	-1.90355
ACADS	PRAD	MissenseAndNonsense	Random	-0.294874
ACADS	SKCA	MissenseAndNonsense_inHS.Permissive	Random	0
ACADS	SKCA	MissenseAndNonsense_inHS.Trevino	Random	-3.20343e-16
ACADS	SKCA	MissenseAndNonsense_outHS.Permissive	Random	6.40685e-16
ACADS	SKCA	MissenseAndNonsense	Random	3.20343e-16
ACADS	SKCM	MissenseAndNonsense_inHS.Permissive	Random	1.23813
ACADS	SKCM	MissenseAndNonsense_inHS.Trevino	Random	-4.80514e-16
ACADS	SKCM	MissenseAndNonsense_outHS.Permissive	Random	-1.54772
ACADS	SKCM	MissenseAndNonsense	Random	-0.41456
ACADS	STAD	MissenseAndNonsense_inHS.Permissive	Random	1.28137e-15
ACADS	STAD	MissenseAndNonsense_inHS.Trevino	Random	3.20343e-16
ACADS	STAD	MissenseAndNonsense_outHS.Permissive	Random	-0.80371
ACADS	STAD	MissenseAndNonsense	Random	-0.794334
ACADS	STAD_MSI	MissenseAndNonsense_inHS.Permissive	Random	0.676265
ACADS	STAD_MSI	MissenseAndNonsense_inHS.Trevino	Random	4.23844
ACADS	STAD_MSI	MissenseAndNonsense_outHS.Permissive	Random	-0.495026
ACADS	STAD_MSI	MissenseAndNonsense	Random	1.4566e-11
ACADS	UCEC	MissenseAndNonsense_inHS.Permissive	Random	2.37815
ACADS	UCEC	MissenseAndNonsense_inHS.Trevino	Random	3.50638
ACADS	UCEC	MissenseAndNonsense_outHS.Permissive	Random	-0.824594
ACADS	UCEC	MissenseAndNonsense	Random	1.06491
ACADS	UCEC_MSI	MissenseAndNonsense_inHS.Permissive	Random	-2.95036e-13
ACADS	UCEC_MSI	MissenseAndNonsense_inHS.Trevino	Random	9.61028e-16
ACADS	UCEC_MSI	MissenseAndNonsense_outHS.Permissive	Random	-0.547536
ACADS	UCEC_MSI	MissenseAndNonsense	Random	-0.283294
ACADS	UCEC_POLE	MissenseAndNonsense_inHS.Permissive	Random	1.8087
ACADS	UCEC_POLE	MissenseAndNonsense_inHS.Trevino	Random	-1.76188e-15
ACADS	UCEC_POLE	MissenseAndNonsense_outHS.Permissive	Random	-2.10667
ACADS	UCEC_POLE	MissenseAndNonsense	Random	4.78752e-12
ACAP3	BLCA	MissenseAndNonsense_inHS.Permissive	Random	2.01719
ACAP3	BLCA	MissenseAndNonsense_outHS.Permissive	Random	-0.382174
ACAP3	BLCA	MissenseAndNonsense	Random	0.266013
ACAP3	BLCA	Missense	Random	0.419092
ACAP3	BRCA	MissenseAndNonsense_inHS.Permissive	Random	2.48975
ACAP3	BRCA	MissenseAndNonsense_outHS.Permissive	Random	-2.54695e-11
ACAP3	BRCA	MissenseAndNonsense	Random	0.61204
ACAP3	BRCA	Missense	Random	0.61204
ACAP3	BRCA_Lum	MissenseAndNonsense_inHS.Permissive	Random	2.2458
ACAP3	BRCA_Lum	MissenseAndNonsense_outHS.Permissive	Random	-2.44821
ACAP3	BRCA_Lum	MissenseAndNonsense	Random	2.27562e-11
ACAP3	BRCA_Lum	Missense	Random	2.71235e-10
ACAP3	BRCA_tri-	MissenseAndNonsense_inHS.Permissive	Random	3.20343e-16
ACAP3	BRCA_tri-	MissenseAndNonsense_outHS.Permissive	Random	0.528574
ACAP3	BRCA_tri-	MissenseAndNonsense	Random	0.504133
ACAP3	BRCA_tri-	Missense	Random	0.504133
ACAP3	BTCA	MissenseAndNonsense_inHS.Permissive	Random	0
ACAP3	BTCA	MissenseAndNonsense_outHS.Permissive	Random	4.81831e-11
ACAP3	BTCA	MissenseAndNonsense	Random	3.3668e-13
ACAP3	BTCA	Missense	Random	3.3668e-13
ACAP3	CESC	MissenseAndNonsense_inHS.Permissive	Random	1.95771
ACAP3	CESC	MissenseAndNonsense_outHS.Permissive	Random	-6.62437e-12
ACAP3	CESC	MissenseAndNonsense	Random	0.684095
ACAP3	CESC	Missense	Random	0.705434
ACAP3	CESC_MSI	MissenseAndNonsense_inHS.Permissive	Random	3.20343e-16
ACAP3	CESC_MSI	MissenseAndNonsense_outHS.Permissive	Random	-0.792602
ACAP3	CESC_MSI	MissenseAndNonsense	Random	-0.827103
ACAP3	CESC_MSI	Missense	Random	-0.827103
ACAP3	COREAD	MissenseAndNonsense_inHS.Permissive	Random	1.55748
ACAP3	COREAD	MissenseAndNonsense_outHS.Permissive	Random	-0.280792
ACAP3	COREAD	MissenseAndNonsense	Random	0.188837
ACAP3	COREAD	Missense	Random	0.403537
ACAP3	COREAD_MSI	MissenseAndNonsense_inHS.Permissive	Random	2.95133
ACAP3	COREAD_MSI	MissenseAndNonsense_outHS.Permissive	Random	-1.60029
ACAP3	COREAD_MSI	MissenseAndNonsense	Random	0.700942
ACAP3	COREAD_MSI	Missense	Random	0.708682
ACAP3	COREAD_POLE	MissenseAndNonsense_inHS.Permissive	Random	1.56384
ACAP3	COREAD_POLE	MissenseAndNonsense_outHS.Permissive	Random	-1.46568
ACAP3	COREAD_POLE	MissenseAndNonsense	Random	-0.2059
ACAP3	COREAD_POLE	Missense	Random	-0.206531
ACAP3	EOPC	MissenseAndNonsense_inHS.Permissive	Random	-6.40685e-16
ACAP3	EOPC	MissenseAndNonsense_outHS.Permissive	Random	0.858938
ACAP3	EOPC	MissenseAndNonsense	Random	0.840047
ACAP3	EOPC	Missense	Random	0.840047
ACAP3	ESAD	MissenseAndNonsense_inHS.Permissive	Random	-1.1212e-15
ACAP3	ESAD	MissenseAndNonsense_outHS.Permissive	Random	6.40685e-16
ACAP3	ESAD	MissenseAndNonsense	Random	-0.483368
ACAP3	ESAD	Missense	Random	-0.483368
ACAP3	ESAD_MSI	MissenseAndNonsense_inHS.Permissive	Random	3.20343e-16
ACAP3	ESAD_MSI	MissenseAndNonsense_outHS.Permissive	Random	-3.20343e-16
ACAP3	ESAD_MSI	MissenseAndNonsense	Random	-0.798526
ACAP3	ESAD_MSI	Missense	Random	-0.798526
ACAP3	ESAD_POLE	MissenseAndNonsense_inHS.Permissive	Random	1.59363
ACAP3	ESAD_POLE	MissenseAndNonsense_outHS.Permissive	Random	-3.20343e-16
ACAP3	ESAD_POLE	MissenseAndNonsense	Random	7.0847e-12
ACAP3	ESAD_POLE	Missense	Random	6.39724e-12
ACAP3	ESCA	MissenseAndNonsense_inHS.Permissive	Random	0
ACAP3	ESCA	MissenseAndNonsense_outHS.Permissive	Random	-0.795253
ACAP3	ESCA	MissenseAndNonsense	Random	-0.819646
ACAP3	ESCA	Missense	Random	-0.81122
ACAP3	GBM	MissenseAndNonsense_inHS.Permissive	Random	1.82692
ACAP3	GBM	MissenseAndNonsense_outHS.Permissive	Random	-1.36612
ACAP3	GBM	MissenseAndNonsense	Random	-2.13893e-12
ACAP3	GBM	Missense	Random	-2.78618e-12
ACAP3	HCCBTC	MissenseAndNonsense_inHS.Permissive	Random	1.21899
ACAP3	HCCBTC	MissenseAndNonsense_outHS.Permissive	Random	-3.20343e-16
ACAP3	HCCBTC	MissenseAndNonsense	Random	8.048e-11
ACAP3	HCCBTC	Missense	Random	3.79305e-11
ACAP3	HNSC	MissenseAndNonsense_inHS.Permissive	Random	1.13443
ACAP3	HNSC	MissenseAndNonsense_outHS.Permissive	Random	-0.64581
ACAP3	HNSC	MissenseAndNonsense	Random	-0.207776
ACAP3	HNSC	Missense	Random	-0.237776
ACAP3	KICH	MissenseAndNonsense_outHS.Permissive	Random	1.9172
ACAP3	KICH	MissenseAndNonsense	Random	1.75962
ACAP3	KICH	Missense	Random	1.75962
ACAP3	Kidney	MissenseAndNonsense_inHS.Permissive	Random	0.820782
ACAP3	Kidney	MissenseAndNonsense_outHS.Permissive	Random	-0.842817
ACAP3	Kidney	MissenseAndNonsense	Random	-0.353737
ACAP3	Kidney	Missense	Random	-0.353909
ACAP3	LGG	MissenseAndNonsense_inHS.Permissive	Random	2.38126
ACAP3	LGG	MissenseAndNonsense_outHS.Permissive	Random	0.367148
ACAP3	LGG	MissenseAndNonsense	Random	0.847913
ACAP3	LGG	Missense	Random	0.858499
ACAP3	LICA	MissenseAndNonsense_inHS.Permissive	Random	1.74123
ACAP3	LICA	MissenseAndNonsense_outHS.Permissive	Random	0.801278
ACAP3	LICA	MissenseAndNonsense	Random	1.44434
ACAP3	LICA	Missense	Random	1.55371
ACAP3	LIHC	MissenseAndNonsense_inHS.Permissive	Random	1.01883
ACAP3	LIHC	MissenseAndNonsense_outHS.Permissive	Random	-0.831469
ACAP3	LIHC	MissenseAndNonsense	Random	-0.485576
ACAP3	LIHC	Missense	Random	-0.485576
ACAP3	LUAD	MissenseAndNonsense_inHS.Permissive	Random	2.37361
ACAP3	LUAD	MissenseAndNonsense_outHS.Permissive	Random	-0.73066
ACAP3	LUAD	MissenseAndNonsense	Random	0.28943
ACAP3	LUAD	Missense	Random	0.292341
ACAP3	LUSC	MissenseAndNonsense_inHS.Permissive	Random	1.58594
ACAP3	LUSC	MissenseAndNonsense_outHS.Permissive	Random	-1.47642
ACAP3	LUSC	MissenseAndNonsense	Random	-0.205074
ACAP3	LUSC	Missense	Random	-0.206501
ACAP3	MALY	MissenseAndNonsense_inHS.Permissive	Random	-6.40685e-16
ACAP3	MALY	MissenseAndNonsense_outHS.Permissive	Random	-0.797156
ACAP3	MALY	MissenseAndNonsense	Random	-0.79231
ACAP3	MALY	Missense	Random	-0.79231
ACAP3	MM	MissenseAndNonsense_inHS.Permissive	Random	0
ACAP3	MM	MissenseAndNonsense_outHS.Permissive	Random	-0.353742
ACAP3	MM	MissenseAndNonsense	Random	-0.646596
ACAP3	MM	Missense	Random	-0.353877
ACAP3	NET	MissenseAndNonsense_inHS.Permissive	Random	-1.60171e-16
ACAP3	NET	MissenseAndNonsense_outHS.Permissive	Random	-0.787848
ACAP3	NET	MissenseAndNonsense	Random	-0.801722
ACAP3	NET	Missense	Random	-0.796299
ACAP3	NSCLC	MissenseAndNonsense_inHS.Permissive	Random	3.02161
ACAP3	NSCLC	MissenseAndNonsense_outHS.Permissive	Random	-0.840885
ACAP3	NSCLC	MissenseAndNonsense	Random	0.394493
ACAP3	NSCLC	Missense	Random	0.400053
ACAP3	OV	MissenseAndNonsense_inHS.Permissive	Random	3.20343e-16
ACAP3	OV	MissenseAndNonsense_outHS.Permissive	Random	-0.829574
ACAP3	OV	MissenseAndNonsense	Random	-1.36611
ACAP3	OV	Missense	Random	-1.36611
ACAP3	PAAD	MissenseAndNonsense_inHS.Permissive	Random	1.51122
ACAP3	PAAD	MissenseAndNonsense_outHS.Permissive	Random	-0.356188
ACAP3	PAAD	MissenseAndNonsense	Random	0.291622
ACAP3	PAAD	Missense	Random	0.293187
ACAP3	PBCA	MissenseAndNonsense_inHS.Permissive	Random	0.816253
ACAP3	PBCA	MissenseAndNonsense_outHS.Permissive	Random	-0.476027
ACAP3	PBCA	MissenseAndNonsense	Random	-0.357662
ACAP3	PBCA	Missense	Random	-0.357662
ACAP3	PRAD	MissenseAndNonsense_inHS.Permissive	Random	2.87636e-12
ACAP3	PRAD	MissenseAndNonsense_outHS.Permissive	Random	-0.842604
ACAP3	PRAD	MissenseAndNonsense	Random	-0.353548
ACAP3	PRAD	Missense	Random	-0.353491
ACAP3	SCLC	MissenseAndNonsense_inHS.Permissive	Random	3.94234
ACAP3	SCLC	MissenseAndNonsense_outHS.Permissive	Random	9.61028e-16
ACAP3	SCLC	MissenseAndNonsense	Random	0.769118
ACAP3	SCLC	Missense	Random	0.769118
ACAP3	SKCA	MissenseAndNonsense_inHS.Permissive	Random	1.08162
ACAP3	SKCA	MissenseAndNonsense_outHS.Permissive	Random	-0.806686
ACAP3	SKCA	MissenseAndNonsense	Random	-5.67487e-13
ACAP3	SKCA	Missense	Random	-7.44316e-13
ACAP3	SKCM	MissenseAndNonsense_inHS.Permissive	Random	2.35873
ACAP3	SKCM	MissenseAndNonsense_outHS.Permissive	Random	-2.24882
ACAP3	SKCM	MissenseAndNonsense	Random	-0.180122
ACAP3	SKCM	Missense	Random	-0.295756
ACAP3	STAD	MissenseAndNonsense_inHS.Permissive	Random	0.998648
ACAP3	STAD	MissenseAndNonsense_outHS.Permissive	Random	-1.5215e-11
ACAP3	STAD	MissenseAndNonsense	Random	6.04999e-12
ACAP3	STAD	Missense	Random	6.04999e-12
ACAP3	STAD_MSI	MissenseAndNonsense_inHS.Permissive	Random	1.02736
ACAP3	STAD_MSI	MissenseAndNonsense_outHS.Permissive	Random	-2.5171
ACAP3	STAD_MSI	MissenseAndNonsense	Random	-0.523774
ACAP3	STAD_MSI	Missense	Random	-0.522875
ACAP3	Small_intestine	MissenseAndNonsense_inHS.Permissive	Random	1.44506
ACAP3	Small_intestine	MissenseAndNonsense_outHS.Permissive	Random	-1.60171e-16
ACAP3	Small_intestine	MissenseAndNonsense	Random	1.77976e-11
ACAP3	Small_intestine	Missense	Random	1.77976e-11
ACAP3	UCEC	MissenseAndNonsense_inHS.Permissive	Random	2.48015
ACAP3	UCEC	MissenseAndNonsense_outHS.Permissive	Random	-0.475179
ACAP3	UCEC	MissenseAndNonsense	Random	0.31708
ACAP3	UCEC	Missense	Random	0.325126
ACAP3	UCEC_MSI	MissenseAndNonsense_inHS.Permissive	Random	0.83465
ACAP3	UCEC_MSI	MissenseAndNonsense_outHS.Permissive	Random	-1.20689
ACAP3	UCEC_MSI	MissenseAndNonsense	Random	-0.438961
ACAP3	UCEC_MSI	Missense	Random	-0.340484
ACAP3	UCEC_POLE	MissenseAndNonsense_inHS.Permissive	Random	0.57427
ACAP3	UCEC_POLE	MissenseAndNonsense_outHS.Permissive	Random	-0.637715
ACAP3	UCEC_POLE	MissenseAndNonsense	Random	-0.239055
ACAP3	UCEC_POLE	Missense	Random	-0.24253
ACAP3	UCS	MissenseAndNonsense_inHS.Permissive	Random	0
ACAP3	UCS	MissenseAndNonsense_outHS.Permissive	Random	9.61028e-16
ACAP3	UCS	MissenseAndNonsense	Random	-6.40685e-16
ACAP3	UCS	Missense	Random	-6.40685e-16
ACKR3	BLCA	MissenseAndNonsense_inHS.Permissive	OG noncognate cancer types	-0.889291
ACKR3	BLCA	MissenseAndNonsense_outHS.Permissive	OG noncognate cancer types	-1.48205
ACKR3	BLCA	MissenseAndNonsense	OG noncognate cancer types	-1.33799
ACKR3	BLCA	Missense	OG noncognate cancer types	-1.32978
ACKR3	COREAD_MSI	MissenseAndNonsense_inHS.Permissive	OG cognate cancer types	1.73359
ACKR3	COREAD_MSI	MissenseAndNonsense_outHS.Permissive	OG cognate cancer types	-0.370944
ACKR3	COREAD_MSI	MissenseAndNonsense	OG cognate cancer types	1.28383
ACKR3	COREAD_MSI	Missense	OG cognate cancer types	1.34203
ACKR3	HNSC	MissenseAndNonsense_inHS.Permissive	OG noncognate cancer types	-0.865006
ACKR3	HNSC	MissenseAndNonsense_outHS.Permissive	OG noncognate cancer types	-7.69023e-11
ACKR3	HNSC	MissenseAndNonsense	OG noncognate cancer types	-0.537769
ACKR3	HNSC	Missense	OG noncognate cancer types	-0.537769
ACKR3	LUSC	MissenseAndNonsense_inHS.Permissive	OG noncognate cancer types	-3.33918e-10
ACKR3	LUSC	MissenseAndNonsense_outHS.Permissive	OG noncognate cancer types	1.60171e-15
ACKR3	LUSC	MissenseAndNonsense	OG noncognate cancer types	-0.329888
ACKR3	LUSC	Missense	OG noncognate cancer types	-0.336466
ACKR3	PRAD	MissenseAndNonsense_inHS.Permissive	OG noncognate cancer types	3.99221e-11
ACKR3	PRAD	MissenseAndNonsense_outHS.Permissive	OG noncognate cancer types	-0.809755
ACKR3	PRAD	MissenseAndNonsense	OG noncognate cancer types	-5.48907e-10
ACKR3	PRAD	Missense	OG noncognate cancer types	-5.48907e-10
ACKR3	STAD_MSI	MissenseAndNonsense_inHS.Permissive	OG noncognate cancer types	9.86399e-12
ACKR3	STAD_MSI	MissenseAndNonsense_outHS.Permissive	OG noncognate cancer types	-1.44166
ACKR3	STAD_MSI	MissenseAndNonsense	OG noncognate cancer types	-0.268193
ACKR3	STAD_MSI	Missense	OG noncognate cancer types	-0.273993
ACKR3	UCEC_MSI	MissenseAndNonsense_inHS.Permissive	OG cognate cancer types	1.76735
ACKR3	UCEC_MSI	MissenseAndNonsense_outHS.Permissive	OG cognate cancer types	-0.372664
ACKR3	UCEC_MSI	MissenseAndNonsense	OG cognate cancer types	1.31082
ACKR3	UCEC_MSI	Missense	OG cognate cancer types	1.35868
ACKR3	UCEC_POLE	MissenseAndNonsense_inHS.Permissive	OG noncognate cancer types	0.510911
ACKR3	UCEC_POLE	MissenseAndNonsense_outHS.Permissive	OG noncognate cancer types	8.51208e-11
ACKR3	UCEC_POLE	MissenseAndNonsense	OG noncognate cancer types	0.398624
ACKR3	UCEC_POLE	Missense	OG noncognate cancer types	0.398624
ACLY	BLCA	MissenseAndNonsense_inHS.Permissive	Random	1.06584
ACLY	BLCA	MissenseAndNonsense_outHS.Permissive	Random	-1.13911
ACLY	BLCA	MissenseAndNonsense	Random	6.41967e-12
ACLY	BLCA	Missense	Random	-0.137916
ACLY	BRCA	MissenseAndNonsense_inHS.Permissive	Random	0.404052
ACLY	BRCA	MissenseAndNonsense_outHS.Permissive	Random	-1.98987
ACLY	BRCA	MissenseAndNonsense	Random	-0.537653
ACLY	BRCA	Missense	Random	-0.292353
ACLY	BRCA_HER2	MissenseAndNonsense_inHS.Permissive	Random	4.6848
ACLY	BRCA_HER2	MissenseAndNonsense	Random	2.73586
ACLY	BRCA_HER2	Missense	Random	1.89268
ACLY	BRCA_Lum	MissenseAndNonsense_inHS.Permissive	Random	-0.352423
ACLY	BRCA_Lum	MissenseAndNonsense_outHS.Permissive	Random	-0.522564
ACLY	BRCA_Lum	MissenseAndNonsense	Random	-0.477358
ACLY	BRCA_Lum	Missense	Random	-0.394158
ACLY	BRCA_tri-	MissenseAndNonsense_inHS.Permissive	Random	1.35928e-11
ACLY	BRCA_tri-	MissenseAndNonsense_outHS.Permissive	Random	3.70092e-11
ACLY	BRCA_tri-	MissenseAndNonsense	Random	3.7237e-11
ACLY	BRCA_tri-	Missense	Random	3.72347e-11
ACLY	BTCA	MissenseAndNonsense_inHS.Permissive	Random	2.55659
ACLY	BTCA	MissenseAndNonsense	Random	1.51687
ACLY	BTCA	Missense	Random	1.51687
ACLY	CESC	MissenseAndNonsense_inHS.Permissive	Random	1.461
ACLY	CESC	MissenseAndNonsense_outHS.Permissive	Random	0.392705
ACLY	CESC	MissenseAndNonsense	Random	1.0745
ACLY	CESC	Missense	Random	1.09107
ACLY	CESC_MSI	MissenseAndNonsense_inHS.Permissive	Random	0
ACLY	CESC_MSI	MissenseAndNonsense_outHS.Permissive	Random	0.89663
ACLY	CESC_MSI	MissenseAndNonsense	Random	5.69464e-11
ACLY	COREAD	MissenseAndNonsense_inHS.Permissive	Random	1.09581
ACLY	COREAD	MissenseAndNonsense_outHS.Permissive	Random	-1.19634
ACLY	COREAD	MissenseAndNonsense	Random	0.168452
ACLY	COREAD	Missense	Random	0.172204
ACLY	COREAD_MSI	MissenseAndNonsense_inHS.Permissive	Random	0.871262
ACLY	COREAD_MSI	MissenseAndNonsense_outHS.Permissive	Random	-1.12241
ACLY	COREAD_MSI	MissenseAndNonsense	Random	-1.00445e-11
ACLY	COREAD_MSI	Missense	Random	-9.85214e-13
ACLY	COREAD_POLE	MissenseAndNonsense_inHS.Permissive	Random	-0.834386
ACLY	COREAD_POLE	MissenseAndNonsense_outHS.Permissive	Random	-0.892683
ACLY	COREAD_POLE	MissenseAndNonsense	Random	-0.951534
ACLY	COREAD_POLE	Missense	Random	-0.946209
ACLY	EOPC	MissenseAndNonsense_inHS.Permissive	Random	-1.60171e-16
ACLY	EOPC	MissenseAndNonsense_outHS.Permissive	Random	6.40685e-16
ACLY	EOPC	MissenseAndNonsense	Random	0
ACLY	EOPC	Missense	Random	-6.40685e-16
ACLY	ESAD	MissenseAndNonsense_inHS.Permissive	Random	-0.813112
ACLY	ESAD	MissenseAndNonsense_outHS.Permissive	Random	0.678951
ACLY	ESAD	MissenseAndNonsense	Random	2.82766e-12
ACLY	ESAD	Missense	Random	3.86814e-12
ACLY	ESAD_MSI	MissenseAndNonsense_inHS.Permissive	Random	6.40685e-16
ACLY	ESAD_MSI	MissenseAndNonsense_outHS.Permissive	Random	0.8424
ACLY	ESAD_MSI	MissenseAndNonsense	Random	5.09985e-12
ACLY	ESAD_MSI	Missense	Random	5.09953e-12
ACLY	ESCA	MissenseAndNonsense_inHS.Permissive	Random	1.49683
ACLY	ESCA	MissenseAndNonsense_outHS.Permissive	Random	-0.792507
ACLY	ESCA	MissenseAndNonsense	Random	0.421729
ACLY	ESCA	Missense	Random	0.421729
ACLY	GBM	MissenseAndNonsense_inHS.Permissive	Random	-0.804914
ACLY	GBM	MissenseAndNonsense_outHS.Permissive	Random	-0.476
ACLY	GBM	MissenseAndNonsense	Random	-0.881719
ACLY	GBM	Missense	Random	-0.877057
ACLY	HCC	MissenseAndNonsense_inHS.Permissive	Random	1.28137e-15
ACLY	HCC	MissenseAndNonsense_outHS.Permissive	Random	5.29975e-12
ACLY	HCC	MissenseAndNonsense	Random	-1.02274e-11
ACLY	HCC	Missense	Random	-6.68827e-12
ACLY	HNSC	MissenseAndNonsense_inHS.Permissive	Random	-0.349088
ACLY	HNSC	MissenseAndNonsense_outHS.Permissive	Random	-1.48852
ACLY	HNSC	MissenseAndNonsense	Random	-1.12265
ACLY	HNSC	Missense	Random	-0.951294
ACLY	Kidney	MissenseAndNonsense_inHS.Permissive	Random	1.44058
ACLY	Kidney	MissenseAndNonsense_outHS.Permissive	Random	0.362779
ACLY	Kidney	MissenseAndNonsense	Random	0.719087
ACLY	Kidney	Missense	Random	0.502564
ACLY	LGG	MissenseAndNonsense_inHS.Permissive	Random	0.395435
ACLY	LGG	MissenseAndNonsense_outHS.Permissive	Random	-0.351906
ACLY	LGG	MissenseAndNonsense	Random	-2.32152e-12
ACLY	LGG	Missense	Random	-0.244297
ACLY	LICA	MissenseAndNonsense_inHS.Permissive	Random	-0.784216
ACLY	LICA	MissenseAndNonsense_outHS.Permissive	Random	-0.860457
ACLY	LICA	MissenseAndNonsense	Random	-1.50737
ACLY	LICA	Missense	Random	-1.44272
ACLY	LIHC	MissenseAndNonsense_inHS.Permissive	Random	-0.801186
ACLY	LIHC	MissenseAndNonsense_outHS.Permissive	Random	2.77276e-11
ACLY	LIHC	MissenseAndNonsense	Random	-0.360321
ACLY	LIHC	Missense	Random	-0.359607
ACLY	LUAD	MissenseAndNonsense_inHS.Permissive	Random	0.602767
ACLY	LUAD	MissenseAndNonsense_outHS.Permissive	Random	-2.2019
ACLY	LUAD	MissenseAndNonsense	Random	-0.485704
ACLY	LUAD	Missense	Random	-0.377866
ACLY	LUAD	Nonsense	Random	-0.80867
ACLY	LUSC	MissenseAndNonsense_inHS.Permissive	Random	0.292297
ACLY	LUSC	MissenseAndNonsense_outHS.Permissive	Random	-0.732874
ACLY	LUSC	MissenseAndNonsense	Random	-0.314594
ACLY	LUSC	Missense	Random	-0.31541
ACLY	MALY	MissenseAndNonsense_inHS.Permissive	Random	0.553506
ACLY	MALY	MissenseAndNonsense_outHS.Permissive	Random	-0.478326
ACLY	MALY	MissenseAndNonsense	Random	-3.39957e-11
ACLY	MALY	Missense	Random	-4.24941e-11
ACLY	MM	MissenseAndNonsense_inHS.Permissive	Random	-1.59468e-11
ACLY	MM	MissenseAndNonsense_outHS.Permissive	Random	-0.477189
ACLY	MM	MissenseAndNonsense	Random	-0.360529
ACLY	MM	Missense	Random	-0.360529
ACLY	NET	MissenseAndNonsense_inHS.Permissive	Random	2.53873
ACLY	NET	MissenseAndNonsense_outHS.Permissive	Random	-0.790588
ACLY	NET	MissenseAndNonsense	Random	0.95473
ACLY	NET	Missense	Random	0.95473
ACLY	NSCLC	MissenseAndNonsense_inHS.Permissive	Random	0.602613
ACLY	NSCLC	MissenseAndNonsense_outHS.Permissive	Random	-0.864073
ACLY	NSCLC	MissenseAndNonsense	Random	-3.8292e-11
ACLY	NSCLC	Missense	Random	4.40791e-13
ACLY	OV	MissenseAndNonsense_inHS.Permissive	Random	4.49761e-13
ACLY	OV	MissenseAndNonsense_outHS.Permissive	Random	-0.831701
ACLY	OV	MissenseAndNonsense	Random	-0.485989
ACLY	OV	Missense	Random	-0.485989
ACLY	PAAD	MissenseAndNonsense_inHS.Permissive	Random	2.62636
ACLY	PAAD	MissenseAndNonsense_outHS.Permissive	Random	-2.03328
ACLY	PAAD	MissenseAndNonsense	Random	1.25225
ACLY	PAAD	Missense	Random	1.26911
ACLY	PBCA	MissenseAndNonsense_inHS.Permissive	Random	-9.89699e-13
ACLY	PBCA	MissenseAndNonsense_outHS.Permissive	Random	-1.48479
ACLY	PBCA	MissenseAndNonsense	Random	-0.889786
ACLY	PBCA	Missense	Random	-0.889786
ACLY	PRAD	MissenseAndNonsense_inHS.Permissive	Random	1.11517
ACLY	PRAD	MissenseAndNonsense_outHS.Permissive	Random	-1.71549
ACLY	PRAD	MissenseAndNonsense	Random	0.138526
ACLY	PRAD	Missense	Random	0.139938
ACLY	SARC	MissenseAndNonsense_inHS.Permissive	Random	1.00809
ACLY	SARC	MissenseAndNonsense	Random	1.55952e-11
ACLY	SCC	MissenseAndNonsense_inHS.Permissive	Random	-8.00857e-16
ACLY	SCC	MissenseAndNonsense_outHS.Permissive	Random	-0.80357
ACLY	SCC	MissenseAndNonsense	Random	-0.802299
ACLY	SCLC	MissenseAndNonsense_inHS.Permissive	Random	0.910297
ACLY	SCLC	MissenseAndNonsense_outHS.Permissive	Random	1.28137e-15
ACLY	SCLC	MissenseAndNonsense	Random	-1.1001e-10
ACLY	SCLC	Missense	Random	1.89936e-10
ACLY	SKCA	MissenseAndNonsense_inHS.Permissive	Random	-0.797542
ACLY	SKCA	MissenseAndNonsense_outHS.Permissive	Random	-1.46403
ACLY	SKCA	MissenseAndNonsense	Random	-2.11808
ACLY	SKCA	Missense	Random	-2.06894
ACLY	SKCM	MissenseAndNonsense_inHS.Permissive	Random	-2.89737e-09
ACLY	SKCM	MissenseAndNonsense_outHS.Permissive	Random	-2.52892
ACLY	SKCM	MissenseAndNonsense	Random	-1.12906
ACLY	SKCM	Missense	Random	-1.23523
ACLY	SKCM	Nonsense	Random	2.42961e-11
ACLY	STAD	MissenseAndNonsense_inHS.Permissive	Random	1.054
ACLY	STAD	MissenseAndNonsense_outHS.Permissive	Random	0.390039
ACLY	STAD	MissenseAndNonsense	Random	0.842672
ACLY	STAD	Missense	Random	0.581611
ACLY	STAD_MSI	MissenseAndNonsense_inHS.Permissive	Random	-1.04445e-10
ACLY	STAD_MSI	MissenseAndNonsense_outHS.Permissive	Random	-0.287267
ACLY	STAD_MSI	MissenseAndNonsense	Random	-0.211284
ACLY	STAD_MSI	Missense	Random	-0.211834
ACLY	UCEC	MissenseAndNonsense_inHS.Permissive	Random	-0.483578
ACLY	UCEC	MissenseAndNonsense_outHS.Permissive	Random	-1.93988
ACLY	UCEC	MissenseAndNonsense	Random	-1.21805
ACLY	UCEC	Missense	Random	-1.20232
ACLY	UCEC_MSI	MissenseAndNonsense_inHS.Permissive	Random	1.04864
ACLY	UCEC_MSI	MissenseAndNonsense_outHS.Permissive	Random	-0.337484
ACLY	UCEC_MSI	MissenseAndNonsense	Random	0.305336
ACLY	UCEC_MSI	Missense	Random	0.196999
ACLY	UCEC_MSI	Nonsense	Random	1.04576
ACLY	UCEC_POLE	MissenseAndNonsense_inHS.Permissive	Random	1.00872e-10
ACLY	UCEC_POLE	MissenseAndNonsense_outHS.Permissive	Random	-0.788901
ACLY	UCEC_POLE	MissenseAndNonsense	Random	-0.377759
ACLY	UCEC_POLE	Missense	Random	-0.410332
ACLY	UCEC_POLE	Nonsense	Random	1.05735e-10
ACTB	BLCA	MissenseAndNonsense_inHS.Permissive	Essential	3.50308
ACTB	BLCA	MissenseAndNonsense_inHS.Trevino	Essential	9.02403
ACTB	BLCA	MissenseAndNonsense_outHS.Permissive	Essential	-0.48503
ACTB	BLCA	MissenseAndNonsense	Essential	2.5239
ACTB	BLCA	Missense	Essential	2.5812
ACTB	BRCA	MissenseAndNonsense_inHS.Permissive	Essential	1.71621
ACTB	BRCA	MissenseAndNonsense_inHS.Trevino	Essential	3.20343e-16
ACTB	BRCA	MissenseAndNonsense_outHS.Permissive	Essential	-0.786946
ACTB	BRCA	MissenseAndNonsense	Essential	0.785608
ACTB	BRCA	Missense	Essential	0.870915
ACTB	BRCA_Lum	MissenseAndNonsense_inHS.Permissive	Essential	2.27535
ACTB	BRCA_Lum	MissenseAndNonsense_inHS.Trevino	Essential	-6.40685e-16
ACTB	BRCA_Lum	MissenseAndNonsense_outHS.Permissive	Essential	-2.64664e-11
ACTB	BRCA_Lum	MissenseAndNonsense	Essential	1.40873
ACTB	BRCA_Lum	Missense	Essential	1.45252
ACTB	CESC	MissenseAndNonsense_inHS.Permissive	Essential	1.466
ACTB	CESC	MissenseAndNonsense_inHS.Trevino	Essential	6.40685e-16
ACTB	CESC	MissenseAndNonsense_outHS.Permissive	Essential	3.20343e-16
ACTB	CESC	MissenseAndNonsense	Essential	1.03086
ACTB	CESC	Missense	Essential	1.1398
ACTB	CESC_MSI	MissenseAndNonsense_inHS.Permissive	Essential	1.85843
ACTB	CESC_MSI	MissenseAndNonsense	Essential	0.63385
ACTB	CESC_MSI	Missense	Essential	0.63385
ACTB	COREAD	MissenseAndNonsense_inHS.Permissive	Essential	-8.92635e-13
ACTB	COREAD	MissenseAndNonsense_inHS.Trevino	Essential	6.40685e-16
ACTB	COREAD	MissenseAndNonsense_outHS.Permissive	Essential	0.36819
ACTB	COREAD	MissenseAndNonsense	Essential	1.97149e-10
ACTB	COREAD	Missense	Essential	-1.99405e-10
ACTB	COREAD_MSI	MissenseAndNonsense_inHS.Permissive	Essential	0.307815
ACTB	COREAD_MSI	MissenseAndNonsense_inHS.Trevino	Essential	-8.00857e-16
ACTB	COREAD_MSI	MissenseAndNonsense_outHS.Permissive	Essential	-0.352955
ACTB	COREAD_MSI	MissenseAndNonsense	Essential	1.21442e-12
ACTB	COREAD_MSI	Missense	Essential	-4.82917e-13
ACTB	COREAD_POLE	MissenseAndNonsense_inHS.Permissive	Essential	-0.480134
ACTB	COREAD_POLE	MissenseAndNonsense_inHS.Trevino	Essential	-3.20343e-16
ACTB	COREAD_POLE	MissenseAndNonsense_outHS.Permissive	Essential	-3.56734e-12
ACTB	COREAD_POLE	MissenseAndNonsense	Essential	-0.298411
ACTB	COREAD_POLE	Missense	Essential	-8.39522e-12
ACTB	ESAD	MissenseAndNonsense_inHS.Permissive	Essential	-3.58415e-12
ACTB	ESAD	MissenseAndNonsense_inHS.Trevino	Essential	0
ACTB	ESAD	MissenseAndNonsense_outHS.Permissive	Essential	-0.796694
ACTB	ESAD	MissenseAndNonsense	Essential	-0.494335
ACTB	ESAD	Missense	Essential	-0.494335
ACTB	ESAD_MSI	MissenseAndNonsense_inHS.Permissive	Essential	0
ACTB	ESAD_MSI	MissenseAndNonsense_inHS.Trevino	Essential	0
ACTB	ESAD_MSI	MissenseAndNonsense_outHS.Permissive	Essential	-0.838043
ACTB	ESAD_MSI	MissenseAndNonsense	Essential	-0.808322
ACTB	ESAD_MSI	Missense	Essential	-0.808322
ACTB	ESCA	MissenseAndNonsense_inHS.Permissive	Essential	0.951574
ACTB	ESCA	MissenseAndNonsense	Essential	3.23866e-13
ACTB	ESCA	Missense	Essential	3.23866e-13
ACTB	HNSC	MissenseAndNonsense_inHS.Permissive	Essential	0.499914
ACTB	HNSC	MissenseAndNonsense_inHS.Trevino	Essential	0
ACTB	HNSC	MissenseAndNonsense_outHS.Permissive	Essential	-5.40594e-12
ACTB	HNSC	MissenseAndNonsense	Essential	-1.38921e-11
ACTB	HNSC	Missense	Essential	-1.13799e-11
ACTB	Kidney	MissenseAndNonsense_inHS.Permissive	Essential	2.76693
ACTB	Kidney	MissenseAndNonsense_inHS.Trevino	Essential	-3.20343e-16
ACTB	Kidney	MissenseAndNonsense_outHS.Permissive	Essential	-0.79925
ACTB	Kidney	MissenseAndNonsense	Essential	1.6426
ACTB	Kidney	Missense	Essential	1.6426
ACTB	LGG	MissenseAndNonsense_inHS.Permissive	Essential	-1.60171e-16
ACTB	LGG	MissenseAndNonsense_inHS.Trevino	Essential	0
ACTB	LGG	MissenseAndNonsense_outHS.Permissive	Essential	-0.788257
ACTB	LGG	MissenseAndNonsense	Essential	-0.492194
ACTB	LGG	Missense	Essential	-0.496024
ACTB	LUAD	MissenseAndNonsense_inHS.Permissive	Essential	1.50505
ACTB	LUAD	MissenseAndNonsense_inHS.Trevino	Essential	1.28137e-15
ACTB	LUAD	MissenseAndNonsense_outHS.Permissive	Essential	-2.05771
ACTB	LUAD	MissenseAndNonsense	Essential	0.465828
ACTB	LUAD	Missense	Essential	0.660881
ACTB	LUSC	MissenseAndNonsense_inHS.Permissive	Essential	1.91765
ACTB	LUSC	MissenseAndNonsense_inHS.Trevino	Essential	-3.20343e-16
ACTB	LUSC	MissenseAndNonsense_outHS.Permissive	Essential	-0.835466
ACTB	LUSC	MissenseAndNonsense	Essential	1.11669
ACTB	LUSC	Missense	Essential	1.17995
ACTB	MALY	MissenseAndNonsense_inHS.Permissive	Essential	7.22189
ACTB	MALY	MissenseAndNonsense	Essential	6.2613
ACTB	MALY	Missense	Essential	6.2613
ACTB	MM	MissenseAndNonsense_inHS.Permissive	Essential	4.21951
ACTB	MM	MissenseAndNonsense_outHS.Permissive	Essential	1.99955
ACTB	MM	MissenseAndNonsense	Essential	3.46461
ACTB	MM	Missense	Essential	3.46461
ACTB	NSCLC	MissenseAndNonsense_inHS.Permissive	Essential	-0.809783
ACTB	NSCLC	MissenseAndNonsense_inHS.Trevino	Essential	-6.40685e-16
ACTB	NSCLC	MissenseAndNonsense_outHS.Permissive	Essential	-0.795823
ACTB	NSCLC	MissenseAndNonsense	Essential	-0.834803
ACTB	NSCLC	Missense	Essential	-0.834803
ACTB	PAAD	MissenseAndNonsense_inHS.Permissive	Essential	1.28027e-10
ACTB	PAAD	MissenseAndNonsense_inHS.Trevino	Essential	0
ACTB	PAAD	MissenseAndNonsense_outHS.Permissive	Essential	-0.795518
ACTB	PAAD	MissenseAndNonsense	Essential	-0.513116
ACTB	PAAD	Missense	Essential	9.61028e-16
ACTB	PBCA	MissenseAndNonsense_inHS.Permissive	Essential	0.687193
ACTB	PBCA	MissenseAndNonsense_inHS.Trevino	Essential	0
ACTB	PBCA	MissenseAndNonsense_outHS.Permissive	Essential	-1.20833e-12
ACTB	PBCA	MissenseAndNonsense	Essential	0.46114
ACTB	PBCA	Missense	Essential	0.46114
ACTB	PRAD	MissenseAndNonsense_inHS.Permissive	Essential	0.523227
ACTB	PRAD	MissenseAndNonsense_inHS.Trevino	Essential	-3.20343e-16
ACTB	PRAD	MissenseAndNonsense_outHS.Permissive	Essential	-0.809408
ACTB	PRAD	MissenseAndNonsense	Essential	-0.381426
ACTB	PRAD	Missense	Essential	-0.495858
ACTB	SKCA	MissenseAndNonsense_inHS.Permissive	Essential	-1.60171e-16
ACTB	SKCA	MissenseAndNonsense_inHS.Trevino	Essential	-1.60171e-16
ACTB	SKCA	MissenseAndNonsense_outHS.Permissive	Essential	0
ACTB	SKCA	MissenseAndNonsense	Essential	-0.806482
ACTB	SKCM	MissenseAndNonsense_inHS.Permissive	Essential	1.24935
ACTB	SKCM	MissenseAndNonsense_inHS.Trevino	Essential	6.40685e-16
ACTB	SKCM	MissenseAndNonsense_outHS.Permissive	Essential	-0.236515
ACTB	SKCM	MissenseAndNonsense	Essential	0.623823
ACTB	SKCM	Missense	Essential	0.749871
ACTB	STAD	MissenseAndNonsense_inHS.Permissive	Essential	3.31269
ACTB	STAD	MissenseAndNonsense	Essential	1.62057
ACTB	STAD	Missense	Essential	1.62057
ACTB	STAD_MSI	MissenseAndNonsense_inHS.Permissive	Essential	0.805268
ACTB	STAD_MSI	MissenseAndNonsense_inHS.Trevino	Essential	-1.60171e-16
ACTB	STAD_MSI	MissenseAndNonsense_outHS.Permissive	Essential	-1.3719
ACTB	STAD_MSI	MissenseAndNonsense	Essential	6.98988e-12
ACTB	STAD_MSI	Missense	Essential	-3.44368e-13
ACTB	UCEC	MissenseAndNonsense_inHS.Permissive	Essential	0.825118
ACTB	UCEC	MissenseAndNonsense_inHS.Trevino	Essential	-3.20343e-16
ACTB	UCEC	MissenseAndNonsense_outHS.Permissive	Essential	0.716743
ACTB	UCEC	MissenseAndNonsense	Essential	1.52475
ACTB	UCEC	Missense	Essential	1.59439
ACTB	UCEC_MSI	MissenseAndNonsense_inHS.Permissive	Essential	1.93679e-12
ACTB	UCEC_MSI	MissenseAndNonsense_inHS.Trevino	Essential	-9.61028e-16
ACTB	UCEC_MSI	MissenseAndNonsense_outHS.Permissive	Essential	-1.47508
ACTB	UCEC_MSI	MissenseAndNonsense	Essential	-0.650076
ACTB	UCEC_MSI	Missense	Essential	-0.509904
ACTB	UCEC_POLE	MissenseAndNonsense_inHS.Permissive	Essential	0.750673
ACTB	UCEC_POLE	MissenseAndNonsense_inHS.Trevino	Essential	0
ACTB	UCEC_POLE	MissenseAndNonsense_outHS.Permissive	Essential	-3.51768e-11
ACTB	UCEC_POLE	MissenseAndNonsense	Essential	0.261932
ACTB	UCEC_POLE	Missense	Essential	0.307403
ACTB	UCEC_POLE	Nonsense	Essential	0.817711
ACTL6A	ANCA	MissenseAndNonsense_inHS.Permissive	Essential	-1.60171e-16
ACTL6A	ANCA	MissenseAndNonsense_outHS.Permissive	Essential	-0.81038
ACTL6A	ANCA	MissenseAndNonsense	Essential	-0.814312
ACTL6A	ANCA	Missense	Essential	-0.814312
ACTL6A	BLCA	MissenseAndNonsense_inHS.Permissive	Essential	-0.379675
ACTL6A	BLCA	MissenseAndNonsense_outHS.Permissive	Essential	-1.58613
ACTL6A	BLCA	MissenseAndNonsense	Essential	-1.11329
ACTL6A	BLCA	Missense	Essential	-1.11365
ACTL6A	BRCA	MissenseAndNonsense_inHS.Permissive	Essential	-2.5202
ACTL6A	BRCA	MissenseAndNonsense_outHS.Permissive	Essential	-5.37797
ACTL6A	BRCA	MissenseAndNonsense	Essential	-4.30017
ACTL6A	BRCA	Missense	Essential	-6.11718
ACTL6A	BRCA_HER2	MissenseAndNonsense_inHS.Permissive	Essential	-1.34902
ACTL6A	BRCA_HER2	MissenseAndNonsense_outHS.Permissive	Essential	-2.08978
ACTL6A	BRCA_HER2	MissenseAndNonsense	Essential	-2.96763
ACTL6A	BRCA_HER2	Missense	Essential	-2.96763
ACTL6A	BRCA_Lum	MissenseAndNonsense_inHS.Permissive	Essential	-4.10598
ACTL6A	BRCA_Lum	MissenseAndNonsense_outHS.Permissive	Essential	-4.5017
ACTL6A	BRCA_Lum	MissenseAndNonsense	Essential	-4.58704
ACTL6A	BRCA_Lum	Missense	Essential	-4.58722
ACTL6A	BRCA_tri-	MissenseAndNonsense_inHS.Permissive	Essential	-1.35161
ACTL6A	BRCA_tri-	MissenseAndNonsense_outHS.Permissive	Essential	-0.881752
ACTL6A	BRCA_tri-	MissenseAndNonsense	Essential	-1.54205
ACTL6A	BRCA_tri-	Missense	Essential	-1.54205
ACTL6A	CESC	MissenseAndNonsense_inHS.Permissive	Essential	-1.18188
ACTL6A	CESC	MissenseAndNonsense_outHS.Permissive	Essential	-4.0478
ACTL6A	CESC	MissenseAndNonsense	Essential	-3.06336
ACTL6A	CESC	Missense	Essential	-3.06336
ACTL6A	CESC_MSI	MissenseAndNonsense_inHS.Permissive	Essential	-1.60171e-16
ACTL6A	CESC_MSI	MissenseAndNonsense_outHS.Permissive	Essential	-0.807074
ACTL6A	CESC_MSI	MissenseAndNonsense	Essential	-0.818443
ACTL6A	CESC_MSI	Missense	Essential	-0.818443
ACTL6A	CESC_POLE	MissenseAndNonsense_inHS.Permissive	Essential	0.947686
ACTL6A	CESC_POLE	MissenseAndNonsense	Essential	2.28693e-12
ACTL6A	CESC_POLE	Missense	Essential	2.28693e-12
ACTL6A	COREAD	MissenseAndNonsense_inHS.Permissive	Essential	-1.39117
ACTL6A	COREAD	MissenseAndNonsense_outHS.Permissive	Essential	-5.35598
ACTL6A	COREAD	MissenseAndNonsense	Essential	-3.00652
ACTL6A	COREAD	Missense	Essential	-3.00668
ACTL6A	COREAD_MSI	MissenseAndNonsense_inHS.Permissive	Essential	0.733161
ACTL6A	COREAD_MSI	MissenseAndNonsense_outHS.Permissive	Essential	-0.90694
ACTL6A	COREAD_MSI	MissenseAndNonsense	Essential	3.14708e-11
ACTL6A	COREAD_MSI	Missense	Essential	-0.157291
ACTL6A	COREAD_POLE	MissenseAndNonsense_inHS.Permissive	Essential	-1.36924
ACTL6A	COREAD_POLE	MissenseAndNonsense_outHS.Permissive	Essential	-0.85207
ACTL6A	COREAD_POLE	MissenseAndNonsense	Essential	-1.24547
ACTL6A	COREAD_POLE	Missense	Essential	-1.22899
ACTL6A	ESAD	MissenseAndNonsense_inHS.Permissive	Essential	-0.80538
ACTL6A	ESAD	MissenseAndNonsense_outHS.Permissive	Essential	-1.74117
ACTL6A	ESAD	MissenseAndNonsense	Essential	-2.52218
ACTL6A	ESAD	Missense	Essential	-2.52218
ACTL6A	ESCA	MissenseAndNonsense_inHS.Permissive	Essential	-0.796693
ACTL6A	ESCA	MissenseAndNonsense_outHS.Permissive	Essential	-0.858163
ACTL6A	ESCA	MissenseAndNonsense	Essential	-1.21282
ACTL6A	ESCA	Missense	Essential	-1.21282
ACTL6A	GBM	MissenseAndNonsense_inHS.Permissive	Essential	-1.51136
ACTL6A	GBM	MissenseAndNonsense_outHS.Permissive	Essential	-0.650247
ACTL6A	GBM	MissenseAndNonsense	Essential	-1.18321
ACTL6A	GBM	Missense	Essential	-1.17537
ACTL6A	HNSC	MissenseAndNonsense_inHS.Permissive	Essential	-1.30605
ACTL6A	HNSC	MissenseAndNonsense_outHS.Permissive	Essential	-3.00851
ACTL6A	HNSC	MissenseAndNonsense	Essential	-2.45882
ACTL6A	HNSC	Missense	Essential	-2.93585
ACTL6A	Kidney	MissenseAndNonsense_inHS.Permissive	Essential	-0.48073
ACTL6A	Kidney	MissenseAndNonsense_outHS.Permissive	Essential	-0.358305
ACTL6A	Kidney	MissenseAndNonsense	Essential	-0.548189
ACTL6A	Kidney	Missense	Essential	-0.674488
ACTL6A	LGG	MissenseAndNonsense_inHS.Permissive	Essential	-2.00604
ACTL6A	LGG	MissenseAndNonsense_outHS.Permissive	Essential	-2.93022
ACTL6A	LGG	MissenseAndNonsense	Essential	-3.86024
ACTL6A	LGG	Missense	Essential	-3.86024
ACTL6A	LIHC	MissenseAndNonsense_inHS.Permissive	Essential	1.5264e-10
ACTL6A	LIHC	MissenseAndNonsense_outHS.Permissive	Essential	-0.492279
ACTL6A	LIHC	MissenseAndNonsense	Essential	-0.374774
ACTL6A	LIHC	Missense	Essential	-0.378652
ACTL6A	LUAD	MissenseAndNonsense_inHS.Permissive	Essential	0.242569
ACTL6A	LUAD	MissenseAndNonsense_outHS.Permissive	Essential	-1.36372
ACTL6A	LUAD	MissenseAndNonsense	Essential	-0.708604
ACTL6A	LUAD	Missense	Essential	-0.588637
ACTL6A	LUSC	MissenseAndNonsense_inHS.Permissive	Essential	-0.89141
ACTL6A	LUSC	MissenseAndNonsense_outHS.Permissive	Essential	-2.58778
ACTL6A	LUSC	MissenseAndNonsense	Essential	-2.09287
ACTL6A	LUSC	Missense	Essential	-1.98653
ACTL6A	NET	MissenseAndNonsense_inHS.Permissive	Essential	0.941978
ACTL6A	NET	MissenseAndNonsense	Essential	-3.07193e-12
ACTL6A	NET	Missense	Essential	-3.07193e-12
ACTL6A	NSCLC	MissenseAndNonsense_inHS.Permissive	Essential	0
ACTL6A	NSCLC	MissenseAndNonsense_outHS.Permissive	Essential	-0.801333
ACTL6A	NSCLC	MissenseAndNonsense	Essential	-0.882859
ACTL6A	NSCLC	Missense	Essential	-0.882859
ACTL6A	OV	MissenseAndNonsense_inHS.Permissive	Essential	0.529373
ACTL6A	OV	MissenseAndNonsense_outHS.Permissive	Essential	-1.40429
ACTL6A	OV	MissenseAndNonsense	Essential	-0.367724
ACTL6A	OV	Missense	Essential	-0.367724
ACTL6A	PAAD	MissenseAndNonsense_inHS.Permissive	Essential	-0.830373
ACTL6A	PAAD	MissenseAndNonsense_outHS.Permissive	Essential	-1.50722
ACTL6A	PAAD	MissenseAndNonsense	Essential	-2.21439
ACTL6A	PAAD	Missense	Essential	-2.21439
ACTL6A	PBCA	MissenseAndNonsense_inHS.Permissive	Essential	0.494719
ACTL6A	PBCA	MissenseAndNonsense_outHS.Permissive	Essential	-1.48898
ACTL6A	PBCA	MissenseAndNonsense	Essential	-0.671513
ACTL6A	PBCA	Missense	Essential	-0.672858
ACTL6A	PRAD	MissenseAndNonsense_inHS.Permissive	Essential	1.76032e-10
ACTL6A	PRAD	MissenseAndNonsense_outHS.Permissive	Essential	-1.48864
ACTL6A	PRAD	MissenseAndNonsense	Essential	-0.658863
ACTL6A	PRAD	Missense	Essential	-0.658863
ACTL6A	SKCM	MissenseAndNonsense_inHS.Permissive	Essential	-1.45347e-11
ACTL6A	SKCM	MissenseAndNonsense_outHS.Permissive	Essential	-1.3436
ACTL6A	SKCM	MissenseAndNonsense	Essential	-0.65475
ACTL6A	SKCM	Missense	Essential	-0.656182
ACTL6A	STAD	MissenseAndNonsense_inHS.Permissive	Essential	-1.86815
ACTL6A	STAD	MissenseAndNonsense_outHS.Permissive	Essential	-1.47451
ACTL6A	STAD	MissenseAndNonsense	Essential	-2.04617
ACTL6A	STAD	Missense	Essential	-2.04617
ACTL6A	STAD_MSI	MissenseAndNonsense_inHS.Permissive	Essential	6.17633e-11
ACTL6A	STAD_MSI	MissenseAndNonsense_outHS.Permissive	Essential	-2.50487
ACTL6A	STAD_MSI	MissenseAndNonsense	Essential	-0.966824
ACTL6A	STAD_MSI	Missense	Essential	-0.966824
ACTL6A	UC	MissenseAndNonsense_inHS.Permissive	Essential	6.40685e-16
ACTL6A	UC	MissenseAndNonsense_outHS.Permissive	Essential	-0.804123
ACTL6A	UC	MissenseAndNonsense	Essential	-1.40691
ACTL6A	UC	Missense	Essential	-1.40691
ACTL6A	UCEC	MissenseAndNonsense_inHS.Permissive	Essential	-2.54267
ACTL6A	UCEC	MissenseAndNonsense_outHS.Permissive	Essential	-3.43667
ACTL6A	UCEC	MissenseAndNonsense	Essential	-3.43898
ACTL6A	UCEC	Missense	Essential	-3.43884
ACTL6A	UCEC_MSI	MissenseAndNonsense_inHS.Permissive	Essential	-0.277907
ACTL6A	UCEC_MSI	MissenseAndNonsense_outHS.Permissive	Essential	-1.9301
ACTL6A	UCEC_MSI	MissenseAndNonsense	Essential	-1.0552
ACTL6A	UCEC_MSI	Missense	Essential	-0.988989
ACTL6A	UCEC_POLE	MissenseAndNonsense_inHS.Permissive	Essential	-0.62139
ACTL6A	UCEC_POLE	MissenseAndNonsense_outHS.Permissive	Essential	-1.10925
ACTL6A	UCEC_POLE	MissenseAndNonsense	Essential	-1.01
ACTL6A	UCEC_POLE	Missense	Essential	-1.39922
ACTL6A	UCEC_POLE	Nonsense	Essential	0.673649
ACTL6A	UCS	MissenseAndNonsense_inHS.Permissive	Essential	-0.782708
ACTL6A	UCS	MissenseAndNonsense_outHS.Permissive	Essential	-1.37189
ACTL6A	UCS	MissenseAndNonsense	Essential	-1.5631
ACTL6A	UCS	Missense	Essential	-1.539
ACTL6A	UTCA	MissenseAndNonsense_inHS.Permissive	Essential	6.40685e-16
ACTL6A	UTCA	MissenseAndNonsense_outHS.Permissive	Essential	-0.797241
ACTL6A	UTCA	MissenseAndNonsense	Essential	-0.871569
ACTL6A	UTCA	Missense	Essential	-0.871569
ACTR10	BLCA	MissenseAndNonsense_inHS.Permissive	Essential	1.75861
ACTR10	BLCA	MissenseAndNonsense_outHS.Permissive	Essential	-0.900152
ACTR10	BLCA	MissenseAndNonsense	Essential	-0.296067
ACTR10	BLCA	Missense	Essential	-0.299774
ACTR10	BRCA_Lum	MissenseAndNonsense_inHS.Permissive	Essential	0.997814
ACTR10	BRCA_Lum	MissenseAndNonsense_outHS.Permissive	Essential	-1.5165
ACTR10	BRCA_Lum	MissenseAndNonsense	Essential	-0.882557
ACTR10	BRCA_Lum	Missense	Essential	-0.496255
ACTR10	CESC	MissenseAndNonsense_inHS.Permissive	Essential	1.28137e-15
ACTR10	CESC	MissenseAndNonsense_outHS.Permissive	Essential	-2.06566e-10
ACTR10	CESC	MissenseAndNonsense	Essential	-1.72808e-10
ACTR10	CESC	Missense	Essential	-0.836107
ACTR10	COREAD	MissenseAndNonsense_inHS.Permissive	Essential	1.11093
ACTR10	COREAD	MissenseAndNonsense_outHS.Permissive	Essential	-0.909934
ACTR10	COREAD	MissenseAndNonsense	Essential	-0.497966
ACTR10	COREAD	Missense	Essential	-0.501407
ACTR10	COREAD_MSI	MissenseAndNonsense_inHS.Permissive	Essential	3.20343e-16
ACTR10	COREAD_MSI	MissenseAndNonsense_outHS.Permissive	Essential	-0.829354
ACTR10	COREAD_MSI	MissenseAndNonsense	Essential	-0.846017
ACTR10	COREAD_MSI	Missense	Essential	-0.828571
ACTR10	COREAD_POLE	MissenseAndNonsense_inHS.Permissive	Essential	9.61028e-16
ACTR10	COREAD_POLE	MissenseAndNonsense_outHS.Permissive	Essential	-1.53196
ACTR10	COREAD_POLE	MissenseAndNonsense	Essential	-2.03046
ACTR10	COREAD_POLE	Missense	Essential	-1.56504
ACTR10	HNSC	MissenseAndNonsense_inHS.Permissive	Essential	0
ACTR10	HNSC	MissenseAndNonsense_outHS.Permissive	Essential	-1.4266
ACTR10	HNSC	MissenseAndNonsense	Essential	-1.47618
ACTR10	HNSC	Missense	Essential	-1.4476
ACTR10	LGG	MissenseAndNonsense_outHS.Permissive	Essential	0.626331
ACTR10	LGG	MissenseAndNonsense	Essential	1.1476
ACTR10	LGG	Missense	Essential	1.25259
ACTR10	LUAD	MissenseAndNonsense_inHS.Permissive	Essential	1.07512
ACTR10	LUAD	MissenseAndNonsense_outHS.Permissive	Essential	-1.46089
ACTR10	LUAD	MissenseAndNonsense	Essential	-0.497384
ACTR10	LUAD	Missense	Essential	-0.496742
ACTR10	LUSC	MissenseAndNonsense_inHS.Permissive	Essential	0.959457
ACTR10	LUSC	MissenseAndNonsense_outHS.Permissive	Essential	-0.501893
ACTR10	LUSC	MissenseAndNonsense	Essential	-0.37026
ACTR10	LUSC	Missense	Essential	-0.372115
ACTR10	MM	MissenseAndNonsense_inHS.Permissive	Essential	1.29994
ACTR10	MM	MissenseAndNonsense_outHS.Permissive	Essential	-0.834344
ACTR10	MM	MissenseAndNonsense	Essential	-7.78224e-12
ACTR10	MM	Missense	Essential	-1.60171e-16
ACTR10	NSCLC	MissenseAndNonsense_inHS.Permissive	Essential	-4.80514e-16
ACTR10	NSCLC	MissenseAndNonsense_outHS.Permissive	Essential	-0.810093
ACTR10	NSCLC	MissenseAndNonsense	Essential	-0.820102
ACTR10	NSCLC	Missense	Essential	-0.820102
ACTR10	PRAD	MissenseAndNonsense_inHS.Permissive	Essential	0
ACTR10	PRAD	MissenseAndNonsense_outHS.Permissive	Essential	0.531395
ACTR10	PRAD	MissenseAndNonsense	Essential	5.99211e-11
ACTR10	PRAD	Missense	Essential	5.99211e-11
ACTR10	SKCM	MissenseAndNonsense_inHS.Permissive	Essential	1.41356
ACTR10	SKCM	MissenseAndNonsense_outHS.Permissive	Essential	-0.547661
ACTR10	SKCM	MissenseAndNonsense	Essential	1.07571e-10
ACTR10	SKCM	Missense	Essential	0.23513
ACTR10	SKCM	Nonsense	Essential	-0.832594
ACTR10	STAD_MSI	MissenseAndNonsense_inHS.Permissive	Essential	2.80776
ACTR10	STAD_MSI	MissenseAndNonsense_outHS.Permissive	Essential	-5.60049e-11
ACTR10	STAD_MSI	MissenseAndNonsense	Essential	0.516329
ACTR10	STAD_MSI	Missense	Essential	0.516329
ACTR10	UCEC	MissenseAndNonsense_inHS.Permissive	Essential	1.33576
ACTR10	UCEC	MissenseAndNonsense_outHS.Permissive	Essential	-0.812094
ACTR10	UCEC	MissenseAndNonsense	Essential	-8.56917e-14
ACTR10	UCEC	Missense	Essential	-4.80514e-16
ACTR10	UCEC_MSI	MissenseAndNonsense_inHS.Permissive	Essential	0.556517
ACTR10	UCEC_MSI	MissenseAndNonsense_outHS.Permissive	Essential	-0.46364
ACTR10	UCEC_MSI	MissenseAndNonsense	Essential	-0.370847
ACTR10	UCEC_MSI	Missense	Essential	-0.199261
ACTR10	UCEC_POLE	MissenseAndNonsense_inHS.Permissive	Essential	1.07942
ACTR10	UCEC_POLE	MissenseAndNonsense_outHS.Permissive	Essential	-1.79522
ACTR10	UCEC_POLE	MissenseAndNonsense	Essential	-0.65673
ACTR10	UCEC_POLE	Missense	Essential	-0.472629
ACTR10	UCEC_POLE	Nonsense	Essential	-1.44852
ACTR2	BLCA	MissenseAndNonsense_inHS.Permissive	Essential	0.642311
ACTR2	BLCA	MissenseAndNonsense_outHS.Permissive	Essential	-1.58253
ACTR2	BLCA	MissenseAndNonsense	Essential	-0.807351
ACTR2	BLCA	Missense	Essential	-0.989202
ACTR2	BRCA_Lum	MissenseAndNonsense_inHS.Permissive	Essential	0
ACTR2	BRCA_Lum	MissenseAndNonsense_outHS.Permissive	Essential	-0.507019
ACTR2	BRCA_Lum	MissenseAndNonsense	Essential	-0.516332
ACTR2	BRCA_Lum	Missense	Essential	-0.516332
ACTR2	COREAD	MissenseAndNonsense_inHS.Permissive	Essential	2.19872
ACTR2	COREAD	MissenseAndNonsense_outHS.Permissive	Essential	-0.512018
ACTR2	COREAD	MissenseAndNonsense	Essential	3.6423e-13
ACTR2	COREAD	Missense	Essential	3.6423e-13
ACTR2	COREAD_MSI	MissenseAndNonsense_inHS.Permissive	Essential	0.877862
ACTR2	COREAD_MSI	MissenseAndNonsense_outHS.Permissive	Essential	-0.511694
ACTR2	COREAD_MSI	MissenseAndNonsense	Essential	-0.383342
ACTR2	COREAD_MSI	Missense	Essential	-0.383342
ACTR2	COREAD_POLE	MissenseAndNonsense_inHS.Permissive	Essential	2.98213
ACTR2	COREAD_POLE	MissenseAndNonsense_outHS.Permissive	Essential	2.4715e-10
ACTR2	COREAD_POLE	MissenseAndNonsense	Essential	1.11299
ACTR2	COREAD_POLE	Missense	Essential	0.584997
ACTR2	HNSC	MissenseAndNonsense_inHS.Permissive	Essential	0.922195
ACTR2	HNSC	MissenseAndNonsense_outHS.Permissive	Essential	-1.58275
ACTR2	HNSC	MissenseAndNonsense	Essential	-0.537464
ACTR2	HNSC	Missense	Essential	-0.534365
ACTR2	Kidney	MissenseAndNonsense_inHS.Permissive	Essential	1.20506
ACTR2	Kidney	MissenseAndNonsense_outHS.Permissive	Essential	0.526872
ACTR2	Kidney	MissenseAndNonsense	Essential	0.966446
ACTR2	Kidney	Missense	Essential	0.966446
ACTR2	LGG	MissenseAndNonsense_inHS.Permissive	Essential	2.53535
ACTR2	LGG	MissenseAndNonsense_outHS.Permissive	Essential	-2.39427e-11
ACTR2	LGG	MissenseAndNonsense	Essential	0.428872
ACTR2	LGG	Missense	Essential	0.428872
ACTR2	LUAD	MissenseAndNonsense_inHS.Permissive	Essential	3.34311
ACTR2	LUAD	MissenseAndNonsense_outHS.Permissive	Essential	-0.518661
ACTR2	LUAD	MissenseAndNonsense	Essential	0.606294
ACTR2	LUAD	Missense	Essential	0.634442
ACTR2	LUSC	MissenseAndNonsense_inHS.Permissive	Essential	3.20197
ACTR2	LUSC	MissenseAndNonsense_outHS.Permissive	Essential	0.276614
ACTR2	LUSC	MissenseAndNonsense	Essential	0.917469
ACTR2	LUSC	Missense	Essential	0.706107
ACTR2	PAAD	MissenseAndNonsense_inHS.Permissive	Essential	-1.60171e-16
ACTR2	PAAD	MissenseAndNonsense_outHS.Permissive	Essential	-0.825269
ACTR2	PAAD	MissenseAndNonsense	Essential	-0.841058
ACTR2	PRAD	MissenseAndNonsense_inHS.Permissive	Essential	-1.60171e-16
ACTR2	PRAD	MissenseAndNonsense_outHS.Permissive	Essential	2.31704e-12
ACTR2	PRAD	MissenseAndNonsense	Essential	-0.390672
ACTR2	PRAD	Missense	Essential	-1.35621e-10
ACTR2	SKCM	MissenseAndNonsense_inHS.Permissive	Essential	0.671885
ACTR2	SKCM	MissenseAndNonsense_outHS.Permissive	Essential	-0.555136
ACTR2	SKCM	MissenseAndNonsense	Essential	1.58217e-12
ACTR2	SKCM	Missense	Essential	7.59212e-12
ACTR2	STAD_MSI	MissenseAndNonsense_inHS.Permissive	Essential	0.944662
ACTR2	STAD_MSI	MissenseAndNonsense_outHS.Permissive	Essential	-0.504863
ACTR2	STAD_MSI	MissenseAndNonsense	Essential	-3.44302e-10
ACTR2	STAD_MSI	Missense	Essential	-1.45796e-11
ACTR2	UCEC_MSI	MissenseAndNonsense_inHS.Permissive	Essential	2.90207
ACTR2	UCEC_MSI	MissenseAndNonsense_outHS.Permissive	Essential	-0.252745
ACTR2	UCEC_MSI	MissenseAndNonsense	Essential	0.831581
ACTR2	UCEC_MSI	Missense	Essential	0.926548
ACTR2	UCEC_POLE	MissenseAndNonsense_inHS.Permissive	Essential	2.74099
ACTR2	UCEC_POLE	MissenseAndNonsense_outHS.Permissive	Essential	-9.17301e-13
ACTR2	UCEC_POLE	MissenseAndNonsense	Essential	0.96675
ACTR2	UCEC_POLE	Missense	Essential	1.25645
ACTR5	BLCA	MissenseAndNonsense_inHS.Permissive	Random	0.749285
ACTR5	BRCA	MissenseAndNonsense_inHS.Permissive	Random	-0.821989
ACTR5	BRCA_Lum	MissenseAndNonsense_inHS.Permissive	Random	1.62929e-11
ACTR5	CESC	MissenseAndNonsense_inHS.Permissive	Random	6.40685e-16
ACTR5	COREAD	MissenseAndNonsense_inHS.Permissive	Random	2.70556
ACTR5	COREAD_MSI	MissenseAndNonsense_inHS.Permissive	Random	7.52869e-12
ACTR5	COREAD_POLE	MissenseAndNonsense_inHS.Permissive	Random	1.95514
ACTR5	ESAD	MissenseAndNonsense_inHS.Permissive	Random	0.925254
ACTR5	ESCA	MissenseAndNonsense_inHS.Permissive	Random	0.887049
ACTR5	HCC	MissenseAndNonsense_inHS.Permissive	Random	0
ACTR5	HNSC	MissenseAndNonsense_inHS.Permissive	Random	2.60753
ACTR5	Kidney	MissenseAndNonsense_inHS.Permissive	Random	1.37986
ACTR5	LGG	MissenseAndNonsense_inHS.Permissive	Random	1.55366
ACTR5	LUAD	MissenseAndNonsense_inHS.Permissive	Random	1.5319e-09
ACTR5	LUSC	MissenseAndNonsense_inHS.Permissive	Random	0.766577
ACTR5	NSCLC	MissenseAndNonsense_inHS.Permissive	Random	1.62698e-10
ACTR5	PRAD	MissenseAndNonsense_inHS.Permissive	Random	0.89454
ACTR5	SKCM	MissenseAndNonsense_inHS.Permissive	Random	0.488389
ACTR5	STAD_MSI	MissenseAndNonsense_inHS.Permissive	Random	0.741693
ACTR5	UCEC	MissenseAndNonsense_inHS.Permissive	Random	-0.828465
ACTR5	UCEC_MSI	MissenseAndNonsense_inHS.Permissive	Random	0.944245
ACTR5	UCEC_POLE	MissenseAndNonsense_inHS.Permissive	Random	1.3241
ACVR1	BLCA	MissenseAndNonsense_inHS.Permissive	OG noncognate cancer types	1.00231e-10
ACVR1	BLCA	MissenseAndNonsense_outHS.Permissive	OG noncognate cancer types	-1.24854
ACVR1	BLCA	MissenseAndNonsense	OG noncognate cancer types	-0.605774
ACVR1	BLCA	Missense	OG noncognate cancer types	-0.605774
ACVR1	LUAD	MissenseAndNonsense_inHS.Permissive	OG noncognate cancer types	0.695407
ACVR1	LUAD	MissenseAndNonsense_outHS.Permissive	OG noncognate cancer types	-1.27231
ACVR1	LUAD	MissenseAndNonsense	OG noncognate cancer types	-0.553124
ACVR1	LUAD	Missense	OG noncognate cancer types	-0.553124
ACVR1	LUSC	MissenseAndNonsense	OG noncognate cancer types	1.97661e-11
ACVR1	SKCM	MissenseAndNonsense_inHS.Permissive	OG noncognate cancer types	-0.418984
ACVR1	SKCM	MissenseAndNonsense_inHS.Trevino	OG noncognate cancer types	1.9744
ACVR1	SKCM	MissenseAndNonsense_outHS.Permissive	OG noncognate cancer types	-1.97885
ACVR1	SKCM	MissenseAndNonsense	OG noncognate cancer types	-1.39189
ACVR1	SKCM	Missense	OG noncognate cancer types	-1.39189
ACVR1	UCEC_MSI	MissenseAndNonsense_inHS.Permissive	OG noncognate cancer types	1.72956
ACVR1	UCEC_MSI	MissenseAndNonsense_outHS.Permissive	OG noncognate cancer types	-1.23607
ACVR1	UCEC_MSI	MissenseAndNonsense	OG noncognate cancer types	0.395433
ACVR1	UCEC_MSI	Missense	OG noncognate cancer types	0.433014
ACVR1	UCEC_POLE	MissenseAndNonsense_inHS.Permissive	OG noncognate cancer types	0.322949
ACVR1	UCEC_POLE	MissenseAndNonsense_inHS.Trevino	OG noncognate cancer types	3.20343e-16
ACVR1	UCEC_POLE	MissenseAndNonsense_outHS.Permissive	OG noncognate cancer types	-2.44048
ACVR1	UCEC_POLE	MissenseAndNonsense	OG noncognate cancer types	-0.885634
ACVR1	UCEC_POLE	Missense	OG noncognate cancer types	-0.614326
ACVR1B	BLCA	MissenseAndNonsense_inHS.Permissive	TSG noncognate cancer types	0.306218
ACVR1B	BLCA	MissenseAndNonsense_inHS.Trevino	TSG noncognate cancer types	0
ACVR1B	BLCA	MissenseAndNonsense_outHS.Permissive	TSG noncognate cancer types	-4.31502e-13
ACVR1B	BLCA	MissenseAndNonsense	TSG noncognate cancer types	0.261367
ACVR1B	BLCA	Missense	TSG noncognate cancer types	0.296962
ACVR1B	BRCA_tri-	MissenseAndNonsense_inHS.Permissive	TSG noncognate cancer types	1.37034
ACVR1B	BRCA_tri-	MissenseAndNonsense_inHS.Trevino	TSG noncognate cancer types	3.20343e-16
ACVR1B	BRCA_tri-	MissenseAndNonsense_outHS.Permissive	TSG noncognate cancer types	-4.80514e-16
ACVR1B	BRCA_tri-	MissenseAndNonsense	TSG noncognate cancer types	1.23077
ACVR1B	BRCA_tri-	Missense	TSG noncognate cancer types	5.38208e-12
ACVR1B	CESC	MissenseAndNonsense_inHS.Permissive	TSG noncognate cancer types	-1.98902e-11
ACVR1B	CESC	MissenseAndNonsense_inHS.Trevino	TSG noncognate cancer types	3.20343e-16
ACVR1B	CESC	MissenseAndNonsense_outHS.Permissive	TSG noncognate cancer types	3.20343e-16
ACVR1B	CESC	MissenseAndNonsense	TSG noncognate cancer types	-2.10106e-11
ACVR1B	CESC	Missense	TSG noncognate cancer types	8.92923e-12
ACVR1B	CESC_MSI	MissenseAndNonsense_inHS.Permissive	TSG noncognate cancer types	9.61028e-16
ACVR1B	CESC_MSI	MissenseAndNonsense_inHS.Trevino	TSG noncognate cancer types	0
ACVR1B	CESC_MSI	MissenseAndNonsense_outHS.Permissive	TSG noncognate cancer types	-6.40685e-16
ACVR1B	CESC_MSI	MissenseAndNonsense	TSG noncognate cancer types	-0.807804
ACVR1B	CESC_MSI	Missense	TSG noncognate cancer types	-0.807804
ACVR1B	COREAD_MSI	MissenseAndNonsense_inHS.Permissive	TSG cognate cancer types	1.75777
ACVR1B	COREAD_MSI	MissenseAndNonsense_inHS.Trevino	TSG cognate cancer types	6.40685e-16
ACVR1B	COREAD_MSI	MissenseAndNonsense_outHS.Permissive	TSG cognate cancer types	2.27027e-12
ACVR1B	COREAD_MSI	MissenseAndNonsense	TSG cognate cancer types	1.55141
ACVR1B	COREAD_MSI	Missense	TSG cognate cancer types	1.43126
ACVR1B	COREAD_POLE	MissenseAndNonsense_inHS.Permissive	TSG cognate cancer types	2.16454
ACVR1B	COREAD_POLE	MissenseAndNonsense_inHS.Trevino	TSG cognate cancer types	-4.80514e-16
ACVR1B	COREAD_POLE	MissenseAndNonsense_outHS.Permissive	TSG cognate cancer types	-0.79311
ACVR1B	COREAD_POLE	MissenseAndNonsense	TSG cognate cancer types	1.73829
ACVR1B	COREAD_POLE	Missense	TSG cognate cancer types	1.08464
ACVR1B	ESAD	MissenseAndNonsense_inHS.Permissive	TSG noncognate cancer types	0.648919
ACVR1B	ESAD	MissenseAndNonsense_inHS.Trevino	TSG noncognate cancer types	0
ACVR1B	ESAD	MissenseAndNonsense_outHS.Permissive	TSG noncognate cancer types	0
ACVR1B	ESAD	MissenseAndNonsense	TSG noncognate cancer types	0.568198
ACVR1B	ESAD	Missense	TSG noncognate cancer types	0.568198
ACVR1B	ESCA	MissenseAndNonsense_inHS.Permissive	TSG noncognate cancer types	-1.60171e-16
ACVR1B	ESCA	MissenseAndNonsense_inHS.Trevino	TSG noncognate cancer types	3.20343e-16
ACVR1B	ESCA	MissenseAndNonsense_outHS.Permissive	TSG noncognate cancer types	0
ACVR1B	ESCA	MissenseAndNonsense	TSG noncognate cancer types	1.88233e-12
ACVR1B	ESCA	Missense	TSG noncognate cancer types	1.88265e-12
ACVR1B	GBM	MissenseAndNonsense_inHS.Permissive	TSG noncognate cancer types	-0.822176
ACVR1B	GBM	MissenseAndNonsense_inHS.Trevino	TSG noncognate cancer types	-1.1212e-15
ACVR1B	GBM	MissenseAndNonsense_outHS.Permissive	TSG noncognate cancer types	-1.60171e-16
ACVR1B	GBM	MissenseAndNonsense	TSG noncognate cancer types	-1.38778
ACVR1B	GBM	Missense	TSG noncognate cancer types	-1.37385
ACVR1B	Kidney	MissenseAndNonsense_inHS.Permissive	TSG cognate cancer types	2.58531
ACVR1B	Kidney	MissenseAndNonsense_inHS.Trevino	TSG cognate cancer types	3.20343e-16
ACVR1B	Kidney	MissenseAndNonsense_outHS.Permissive	TSG cognate cancer types	-1.60171e-16
ACVR1B	Kidney	MissenseAndNonsense	TSG cognate cancer types	1.85949
ACVR1B	Kidney	Missense	TSG cognate cancer types	2.69392
ACVR1B	LGG	MissenseAndNonsense_inHS.Permissive	TSG noncognate cancer types	6.23931e-12
ACVR1B	LGG	MissenseAndNonsense_inHS.Trevino	TSG noncognate cancer types	3.20343e-16
ACVR1B	LGG	MissenseAndNonsense_outHS.Permissive	TSG noncognate cancer types	0
ACVR1B	LGG	MissenseAndNonsense	TSG noncognate cancer types	-7.72731e-12
ACVR1B	LGG	Missense	TSG noncognate cancer types	-7.72875e-12
ACVR1B	NSCLC	MissenseAndNonsense_inHS.Permissive	TSG noncognate cancer types	-9.28465e-12
ACVR1B	NSCLC	MissenseAndNonsense_inHS.Trevino	TSG noncognate cancer types	0
ACVR1B	NSCLC	MissenseAndNonsense_outHS.Permissive	TSG noncognate cancer types	0
ACVR1B	NSCLC	MissenseAndNonsense	TSG noncognate cancer types	-1.2724e-11
ACVR1B	NSCLC	Missense	TSG noncognate cancer types	-1.27235e-11
ACVR1B	OV	MissenseAndNonsense_inHS.Permissive	TSG noncognate cancer types	-0.795842
ACVR1B	OV	MissenseAndNonsense_inHS.Trevino	TSG noncognate cancer types	0
ACVR1B	OV	MissenseAndNonsense_outHS.Permissive	TSG noncognate cancer types	1.28137e-15
ACVR1B	OV	MissenseAndNonsense	TSG noncognate cancer types	-0.821896
ACVR1B	OV	Missense	TSG noncognate cancer types	-0.821896
ACVR1B	PAAD	MissenseAndNonsense_inHS.Permissive	TSG cognate cancer types	3.40602
ACVR1B	PAAD	MissenseAndNonsense_inHS.Trevino	TSG cognate cancer types	0
ACVR1B	PAAD	MissenseAndNonsense_outHS.Permissive	TSG cognate cancer types	-3.20343e-16
ACVR1B	PAAD	MissenseAndNonsense	TSG cognate cancer types	2.85649
ACVR1B	PAAD	Missense	TSG cognate cancer types	2.3225
ACVR1B	PBCA	MissenseAndNonsense_inHS.Permissive	TSG noncognate cancer types	1.28964
ACVR1B	PBCA	MissenseAndNonsense_inHS.Trevino	TSG noncognate cancer types	3.20343e-16
ACVR1B	PBCA	MissenseAndNonsense_outHS.Permissive	TSG noncognate cancer types	-1.60171e-16
ACVR1B	PBCA	MissenseAndNonsense	TSG noncognate cancer types	1.12208
ACVR1B	PBCA	Missense	TSG noncognate cancer types	0.56464
ACVR1B	PRAD	MissenseAndNonsense_inHS.Permissive	TSG noncognate cancer types	0.874957
ACVR1B	PRAD	MissenseAndNonsense_inHS.Trevino	TSG noncognate cancer types	3.20343e-16
ACVR1B	PRAD	MissenseAndNonsense_outHS.Permissive	TSG noncognate cancer types	-0.776934
ACVR1B	PRAD	MissenseAndNonsense	TSG noncognate cancer types	0.505117
ACVR1B	PRAD	Missense	TSG noncognate cancer types	0.261757
ACVR1B	SKCA	MissenseAndNonsense_inHS.Permissive	TSG noncognate cancer types	-0.794883
ACVR1B	SKCA	MissenseAndNonsense_inHS.Trevino	TSG noncognate cancer types	0
ACVR1B	SKCA	MissenseAndNonsense_outHS.Permissive	TSG noncognate cancer types	3.20343e-16
ACVR1B	SKCA	MissenseAndNonsense	TSG noncognate cancer types	-0.8284
ACVR1B	SKCA	Missense	TSG noncognate cancer types	-0.81638
ACVR1B	SKCM	MissenseAndNonsense_inHS.Permissive	TSG noncognate cancer types	-0.458985
ACVR1B	SKCM	MissenseAndNonsense_inHS.Trevino	TSG noncognate cancer types	2.2424e-15
ACVR1B	SKCM	MissenseAndNonsense_outHS.Permissive	TSG noncognate cancer types	-0.276792
ACVR1B	SKCM	MissenseAndNonsense	TSG noncognate cancer types	-0.509064
ACVR1B	SKCM	Missense	TSG noncognate cancer types	-0.679741
ACVR1B	STAD	MissenseAndNonsense_inHS.Permissive	TSG noncognate cancer types	8.35854e-11
ACVR1B	STAD	MissenseAndNonsense_inHS.Trevino	TSG noncognate cancer types	-3.20343e-16
ACVR1B	STAD	MissenseAndNonsense_outHS.Permissive	TSG noncognate cancer types	3.20343e-16
ACVR1B	STAD	MissenseAndNonsense	TSG noncognate cancer types	-6.56879e-12
ACVR1B	STAD	Missense	TSG noncognate cancer types	-6.56927e-12
ACVR1B	STAD_MSI	MissenseAndNonsense_inHS.Permissive	TSG cognate cancer types	2.94019
ACVR1B	STAD_MSI	MissenseAndNonsense_inHS.Trevino	TSG cognate cancer types	0
ACVR1B	STAD_MSI	MissenseAndNonsense_outHS.Permissive	TSG cognate cancer types	3.20343e-16
ACVR1B	STAD_MSI	MissenseAndNonsense	TSG cognate cancer types	2.71967
ACVR1B	STAD_MSI	Missense	TSG cognate cancer types	1.16671
ACVR1B	UCEC	MissenseAndNonsense_inHS.Permissive	TSG cognate cancer types	2.87124
ACVR1B	UCEC	MissenseAndNonsense_inHS.Trevino	TSG cognate cancer types	-1.60171e-16
ACVR1B	UCEC	MissenseAndNonsense_outHS.Permissive	TSG cognate cancer types	3.20343e-16
ACVR1B	UCEC	MissenseAndNonsense	TSG cognate cancer types	2.33305
ACVR1B	UCEC	Missense	TSG cognate cancer types	2.57616
ACVR1B	UCEC_MSI	MissenseAndNonsense_inHS.Permissive	TSG cognate cancer types	1.70459
ACVR1B	UCEC_MSI	MissenseAndNonsense_inHS.Trevino	TSG cognate cancer types	7.50361
ACVR1B	UCEC_MSI	MissenseAndNonsense_outHS.Permissive	TSG cognate cancer types	-1.32779
ACVR1B	UCEC_MSI	MissenseAndNonsense	TSG cognate cancer types	1.26085
ACVR1B	UCEC_MSI	Missense	TSG cognate cancer types	1.28522
ACVR1B	UCEC_POLE	MissenseAndNonsense_inHS.Permissive	TSG noncognate cancer types	0.190595
ACVR1B	UCEC_POLE	MissenseAndNonsense_inHS.Trevino	TSG noncognate cancer types	1.92206e-15
ACVR1B	UCEC_POLE	MissenseAndNonsense_outHS.Permissive	TSG noncognate cancer types	-0.800906
ACVR1B	UCEC_POLE	MissenseAndNonsense	TSG noncognate cancer types	-8.82956e-11
ACVR1B	UCEC_POLE	Missense	TSG noncognate cancer types	-0.303749
ACVR2A	BLCA	MissenseAndNonsense_inHS.Permissive	TSG noncognate cancer types	-0.495965
ACVR2A	BLCA	MissenseAndNonsense_outHS.Permissive	TSG noncognate cancer types	-0.824363
ACVR2A	BLCA	MissenseAndNonsense	TSG noncognate cancer types	-0.940502
ACVR2A	BLCA	Missense	TSG noncognate cancer types	-0.932885
ACVR2A	BRCA	MissenseAndNonsense_inHS.Permissive	TSG noncognate cancer types	0.462532
ACVR2A	BRCA	MissenseAndNonsense_outHS.Permissive	TSG noncognate cancer types	-0.811604
ACVR2A	BRCA	MissenseAndNonsense	TSG noncognate cancer types	0.402406
ACVR2A	BRCA	Missense	TSG noncognate cancer types	0.402406
ACVR2A	BRCA_Lum	MissenseAndNonsense_inHS.Permissive	TSG noncognate cancer types	0.730006
ACVR2A	BRCA_Lum	MissenseAndNonsense_outHS.Permissive	TSG noncognate cancer types	-0.803745
ACVR2A	BRCA_Lum	MissenseAndNonsense	TSG noncognate cancer types	0.314665
ACVR2A	BRCA_Lum	Missense	TSG noncognate cancer types	0.318906
ACVR2A	COREAD_MSI	MissenseAndNonsense_inHS.Permissive	TSG noncognate cancer types	-3.92468e-11
ACVR2A	COREAD_MSI	MissenseAndNonsense_outHS.Permissive	TSG noncognate cancer types	-1.17662e-12
ACVR2A	COREAD_MSI	MissenseAndNonsense	TSG noncognate cancer types	-3.25178e-11
ACVR2A	COREAD_MSI	Missense	TSG noncognate cancer types	-0.386081
ACVR2A	ESAD	MissenseAndNonsense_inHS.Permissive	TSG noncognate cancer types	9.61028e-16
ACVR2A	ESAD	MissenseAndNonsense_outHS.Permissive	TSG noncognate cancer types	0.857435
ACVR2A	ESAD	MissenseAndNonsense	TSG noncognate cancer types	0.53016
ACVR2A	ESAD	Missense	TSG noncognate cancer types	-1.88361e-13
ACVR2A	HNSC	MissenseAndNonsense_inHS.Permissive	TSG noncognate cancer types	-1.54123
ACVR2A	HNSC	MissenseAndNonsense_outHS.Permissive	TSG noncognate cancer types	-0.795646
ACVR2A	HNSC	MissenseAndNonsense	TSG noncognate cancer types	-2.18268
ACVR2A	HNSC	Missense	TSG noncognate cancer types	-2.15455
ACVR2A	LGG	MissenseAndNonsense_inHS.Permissive	TSG noncognate cancer types	-2.30936e-10
ACVR2A	LGG	MissenseAndNonsense_outHS.Permissive	TSG noncognate cancer types	-1.60171e-16
ACVR2A	LGG	MissenseAndNonsense	TSG noncognate cancer types	-0.259776
ACVR2A	LGG	Missense	TSG noncognate cancer types	-0.259776
ACVR2A	LUAD	MissenseAndNonsense_inHS.Permissive	TSG noncognate cancer types	-0.248877
ACVR2A	LUAD	MissenseAndNonsense_outHS.Permissive	TSG noncognate cancer types	-0.484879
ACVR2A	LUAD	MissenseAndNonsense	TSG noncognate cancer types	-0.418645
ACVR2A	LUAD	Missense	TSG noncognate cancer types	-0.800598
ACVR2A	LUSC	MissenseAndNonsense_inHS.Permissive	TSG noncognate cancer types	-0.669796
ACVR2A	LUSC	MissenseAndNonsense_outHS.Permissive	TSG noncognate cancer types	-1.44842
ACVR2A	LUSC	MissenseAndNonsense	TSG noncognate cancer types	-1.21873
ACVR2A	LUSC	Missense	TSG noncognate cancer types	-1.21074
ACVR2A	MM	MissenseAndNonsense_inHS.Permissive	TSG noncognate cancer types	0.59719
ACVR2A	MM	MissenseAndNonsense	TSG noncognate cancer types	0.532429
ACVR2A	OV	MissenseAndNonsense_inHS.Permissive	TSG noncognate cancer types	-4.19377e-12
ACVR2A	OV	MissenseAndNonsense_outHS.Permissive	TSG noncognate cancer types	-4.80514e-16
ACVR2A	OV	MissenseAndNonsense	TSG noncognate cancer types	-3.29754e-11
ACVR2A	OV	Missense	TSG noncognate cancer types	-3.29754e-11
ACVR2A	PAAD	MissenseAndNonsense_inHS.Permissive	TSG cognate cancer types	3.05654
ACVR2A	PAAD	MissenseAndNonsense	TSG cognate cancer types	2.62395
ACVR2A	PAAD	Missense	TSG cognate cancer types	2.60396
ACVR2A	PRAD	MissenseAndNonsense_inHS.Permissive	TSG noncognate cancer types	-4.06372e-11
ACVR2A	PRAD	MissenseAndNonsense_outHS.Permissive	TSG noncognate cancer types	-6.40029e-12
ACVR2A	PRAD	MissenseAndNonsense	TSG noncognate cancer types	3.70636e-13
ACVR2A	PRAD	Missense	TSG noncognate cancer types	-1.37427e-12
ACVR2A	SKCM	MissenseAndNonsense_inHS.Permissive	TSG noncognate cancer types	-0.693858
ACVR2A	SKCM	MissenseAndNonsense_outHS.Permissive	TSG noncognate cancer types	-3.5651
ACVR2A	SKCM	MissenseAndNonsense	TSG noncognate cancer types	-1.2281
ACVR2A	SKCM	Missense	TSG noncognate cancer types	-1.87005
ACVR2A	SKCM	Nonsense	TSG noncognate cancer types	1.6164
ACVR2A	STAD	MissenseAndNonsense_inHS.Permissive	TSG noncognate cancer types	-0.259447
ACVR2A	STAD	MissenseAndNonsense_outHS.Permissive	TSG noncognate cancer types	-0.804469
ACVR2A	STAD	MissenseAndNonsense	TSG noncognate cancer types	-0.510781
ACVR2A	STAD	Missense	TSG noncognate cancer types	-0.512179
ACVR2A	STAD_MSI	MissenseAndNonsense_inHS.Permissive	TSG noncognate cancer types	9.88577e-13
ACVR2A	STAD_MSI	MissenseAndNonsense_outHS.Permissive	TSG noncognate cancer types	1.84293e-12
ACVR2A	STAD_MSI	MissenseAndNonsense	TSG noncognate cancer types	-1.29114e-12
ACVR2A	STAD_MSI	Missense	TSG noncognate cancer types	-1.29114e-12
ACVR2A	UCEC_POLE	MissenseAndNonsense_inHS.Permissive	TSG noncognate cancer types	0.634873
ACVR2A	UCEC_POLE	MissenseAndNonsense_outHS.Permissive	TSG noncognate cancer types	-0.480638
ACVR2A	UCEC_POLE	MissenseAndNonsense	TSG noncognate cancer types	0.356351
ACVR2A	UCEC_POLE	Missense	TSG noncognate cancer types	0.394757
ADH1B	BLCA	MissenseAndNonsense_inHS.Permissive	Random	-3.20343e-16
ADH1B	BLCA	MissenseAndNonsense_outHS.Permissive	Random	-6.40685e-16
ADH1B	BLCA	MissenseAndNonsense	Random	-1.60171e-16
ADH1B	BRCA_Lum	MissenseAndNonsense_inHS.Permissive	Random	0
ADH1B	BRCA_Lum	MissenseAndNonsense_outHS.Permissive	Random	0
ADH1B	BRCA_Lum	MissenseAndNonsense	Random	6.40685e-16
ADH1B	BRCA_Lum	Missense	Random	-1.60171e-16
ADH1B	COREAD_POLE	MissenseAndNonsense_inHS.Permissive	Random	-4.80514e-16
ADH1B	COREAD_POLE	MissenseAndNonsense_outHS.Permissive	Random	0
ADH1B	COREAD_POLE	MissenseAndNonsense	Random	-1.60171e-16
ADH1B	COREAD_POLE	Missense	Random	-4.80514e-16
ADH1B	LUAD	MissenseAndNonsense_inHS.Permissive	Random	0
ADH1B	LUAD	MissenseAndNonsense_outHS.Permissive	Random	1.28137e-15
ADH1B	LUAD	MissenseAndNonsense	Random	-8.00857e-16
ADH1B	LUAD	Missense	Random	1.92206e-15
ADH1B	SKCM	MissenseAndNonsense_inHS.Permissive	Random	1.26122
ADH1B	SKCM	MissenseAndNonsense_outHS.Permissive	Random	0
ADH1B	SKCM	MissenseAndNonsense	Random	0.987705
ADH1B	SKCM	Missense	Random	1.0048
ADH1B	UCEC_MSI	MissenseAndNonsense_inHS.Permissive	Random	1.51859
ADH1B	UCEC_MSI	MissenseAndNonsense_outHS.Permissive	Random	3.20343e-16
ADH1B	UCEC_MSI	MissenseAndNonsense	Random	1.19092
ADH1B	UCEC_MSI	Missense	Random	1.24317
ADH1B	UCEC_POLE	MissenseAndNonsense_inHS.Permissive	Random	0
ADH1B	UCEC_POLE	MissenseAndNonsense_outHS.Permissive	Random	1.28137e-15
ADH1B	UCEC_POLE	MissenseAndNonsense	Random	3.20343e-16
ADH1B	UCEC_POLE	Missense	Random	3.20343e-16
ADSL	BLCA	MissenseAndNonsense_inHS.Permissive	Essential	9.01925e-12
ADSL	BLCA	MissenseAndNonsense_inHS.Trevino	Essential	6.40685e-16
ADSL	BLCA	MissenseAndNonsense_outHS.Permissive	Essential	-9.01476e-12
ADSL	BLCA	MissenseAndNonsense	Essential	6.71534e-12
ADSL	BLCA	Missense	Essential	0.297426
ADSL	BRCA	MissenseAndNonsense_inHS.Permissive	Essential	-3.20343e-16
ADSL	BRCA	MissenseAndNonsense_inHS.Trevino	Essential	3.20343e-16
ADSL	BRCA	MissenseAndNonsense_outHS.Permissive	Essential	0.60366
ADSL	BRCA	MissenseAndNonsense	Essential	0.548089
ADSL	BRCA	Missense	Essential	0.548089
ADSL	BRCA_Lum	MissenseAndNonsense_inHS.Permissive	Essential	0.68287
ADSL	BRCA_Lum	MissenseAndNonsense_inHS.Trevino	Essential	6.40685e-16
ADSL	BRCA_Lum	MissenseAndNonsense_outHS.Permissive	Essential	-0.481863
ADSL	BRCA_Lum	MissenseAndNonsense	Essential	-1.95478e-11
ADSL	BRCA_Lum	Missense	Essential	-2.42857e-11
ADSL	BRCA_tri-	MissenseAndNonsense_inHS.Permissive	Essential	2.52435
ADSL	BRCA_tri-	MissenseAndNonsense_inHS.Trevino	Essential	0
ADSL	BRCA_tri-	MissenseAndNonsense_outHS.Permissive	Essential	-0.795115
ADSL	BRCA_tri-	MissenseAndNonsense	Essential	0.550717
ADSL	BRCA_tri-	Missense	Essential	-3.50471e-12
ADSL	CESC	MissenseAndNonsense_inHS.Permissive	Essential	0
ADSL	CESC	MissenseAndNonsense_inHS.Trevino	Essential	-1.60171e-16
ADSL	CESC	MissenseAndNonsense_outHS.Permissive	Essential	-0.793619
ADSL	CESC	MissenseAndNonsense	Essential	-0.827837
ADSL	CESC	Missense	Essential	-0.817232
ADSL	CESC_MSI	MissenseAndNonsense_inHS.Permissive	Essential	0
ADSL	CESC_MSI	MissenseAndNonsense_inHS.Trevino	Essential	-1.60171e-16
ADSL	CESC_MSI	MissenseAndNonsense_outHS.Permissive	Essential	0.824203
ADSL	CESC_MSI	MissenseAndNonsense	Essential	4.18175e-12
ADSL	CESC_MSI	Missense	Essential	4.18175e-12
ADSL	COREAD	MissenseAndNonsense_inHS.Permissive	Essential	1.93789
ADSL	COREAD	MissenseAndNonsense_inHS.Trevino	Essential	0
ADSL	COREAD	MissenseAndNonsense_outHS.Permissive	Essential	-1.51894e-11
ADSL	COREAD	MissenseAndNonsense	Essential	0.843519
ADSL	COREAD	Missense	Essential	0.316171
ADSL	COREAD_MSI	MissenseAndNonsense_inHS.Permissive	Essential	1.47364
ADSL	COREAD_MSI	MissenseAndNonsense_inHS.Trevino	Essential	3.20343e-16
ADSL	COREAD_MSI	MissenseAndNonsense_outHS.Permissive	Essential	-1.1831
ADSL	COREAD_MSI	MissenseAndNonsense	Essential	-1.56595e-11
ADSL	COREAD_MSI	Missense	Essential	-0.244496
ADSL	COREAD_POLE	MissenseAndNonsense_inHS.Permissive	Essential	0.864184
ADSL	COREAD_POLE	MissenseAndNonsense_inHS.Trevino	Essential	-3.20343e-16
ADSL	COREAD_POLE	MissenseAndNonsense_outHS.Permissive	Essential	0.500719
ADSL	COREAD_POLE	MissenseAndNonsense	Essential	0.401283
ADSL	COREAD_POLE	Missense	Essential	0.430238
ADSL	ESCA	MissenseAndNonsense_outHS.Permissive	Essential	1.78855
ADSL	ESCA	MissenseAndNonsense	Essential	1.57756
ADSL	GBM	MissenseAndNonsense_inHS.Permissive	Essential	9.61028e-16
ADSL	GBM	MissenseAndNonsense_inHS.Trevino	Essential	-3.20343e-16
ADSL	GBM	MissenseAndNonsense_outHS.Permissive	Essential	0
ADSL	GBM	MissenseAndNonsense	Essential	-5.68272e-12
ADSL	GBM	Missense	Essential	4.7635e-13
ADSL	HCC	MissenseAndNonsense_inHS.Permissive	Essential	3.28186
ADSL	HCC	MissenseAndNonsense_outHS.Permissive	Essential	0.836455
ADSL	HCC	MissenseAndNonsense	Essential	1.4091
ADSL	HNSC	MissenseAndNonsense_inHS.Permissive	Essential	2.43661
ADSL	HNSC	MissenseAndNonsense_inHS.Trevino	Essential	3.20343e-16
ADSL	HNSC	MissenseAndNonsense_outHS.Permissive	Essential	-2.0025
ADSL	HNSC	MissenseAndNonsense	Essential	0.481125
ADSL	HNSC	Missense	Essential	0.505037
ADSL	Kidney	MissenseAndNonsense_inHS.Permissive	Essential	0
ADSL	Kidney	MissenseAndNonsense_inHS.Trevino	Essential	-3.20343e-16
ADSL	Kidney	MissenseAndNonsense_outHS.Permissive	Essential	0.542319
ADSL	Kidney	MissenseAndNonsense	Essential	0.507712
ADSL	Kidney	Missense	Essential	0.529156
ADSL	LGG	MissenseAndNonsense_inHS.Permissive	Essential	3.39514
ADSL	LGG	MissenseAndNonsense_inHS.Trevino	Essential	0
ADSL	LGG	MissenseAndNonsense_outHS.Permissive	Essential	-0.799381
ADSL	LGG	MissenseAndNonsense	Essential	0.834872
ADSL	LGG	Missense	Essential	0.967432
ADSL	LIHC	MissenseAndNonsense_inHS.Permissive	Essential	3.20343e-16
ADSL	LIHC	MissenseAndNonsense_inHS.Trevino	Essential	0
ADSL	LIHC	MissenseAndNonsense_outHS.Permissive	Essential	1.23281e-11
ADSL	LIHC	MissenseAndNonsense	Essential	1.1689e-11
ADSL	LIHC	Missense	Essential	1.89707e-11
ADSL	LUAD	MissenseAndNonsense_inHS.Permissive	Essential	0
ADSL	LUAD	MissenseAndNonsense_inHS.Trevino	Essential	9.61028e-16
ADSL	LUAD	MissenseAndNonsense_outHS.Permissive	Essential	-0.481623
ADSL	LUAD	MissenseAndNonsense	Essential	-0.863755
ADSL	LUAD	Missense	Essential	-0.858206
ADSL	LUSC	MissenseAndNonsense_inHS.Permissive	Essential	1.62135
ADSL	LUSC	MissenseAndNonsense_inHS.Trevino	Essential	6.40685e-16
ADSL	LUSC	MissenseAndNonsense_outHS.Permissive	Essential	-2.03213
ADSL	LUSC	MissenseAndNonsense	Essential	3.30128e-10
ADSL	LUSC	Missense	Essential	3.31668e-10
ADSL	MALY	MissenseAndNonsense_inHS.Permissive	Essential	3.20343e-16
ADSL	MALY	MissenseAndNonsense_inHS.Trevino	Essential	-6.40685e-16
ADSL	MALY	MissenseAndNonsense_outHS.Permissive	Essential	-0.807548
ADSL	MALY	MissenseAndNonsense	Essential	-0.798073
ADSL	MALY	Missense	Essential	-0.80339
ADSL	MM	MissenseAndNonsense_inHS.Permissive	Essential	1.28137e-15
ADSL	MM	MissenseAndNonsense_inHS.Trevino	Essential	3.20343e-16
ADSL	MM	MissenseAndNonsense_outHS.Permissive	Essential	5.44903e-13
ADSL	MM	MissenseAndNonsense	Essential	-0.50532
ADSL	MM	Missense	Essential	-1.09628e-11
ADSL	NET	MissenseAndNonsense_outHS.Permissive	Essential	0.854849
ADSL	NET	MissenseAndNonsense	Essential	0.821621
ADSL	NSCLC	MissenseAndNonsense_inHS.Permissive	Essential	3.43002
ADSL	NSCLC	MissenseAndNonsense	Essential	1.54041
ADSL	NSCLC	Missense	Essential	1.54041
ADSL	OV	MissenseAndNonsense_inHS.Permissive	Essential	-3.20343e-16
ADSL	OV	MissenseAndNonsense_inHS.Trevino	Essential	-1.60171e-16
ADSL	OV	MissenseAndNonsense_outHS.Permissive	Essential	-0.798257
ADSL	OV	MissenseAndNonsense	Essential	-0.800389
ADSL	OV	Missense	Essential	-0.800389
ADSL	PAAD	MissenseAndNonsense_inHS.Permissive	Essential	-1.60171e-16
ADSL	PAAD	MissenseAndNonsense_inHS.Trevino	Essential	6.40685e-16
ADSL	PAAD	MissenseAndNonsense_outHS.Permissive	Essential	5.02361e-12
ADSL	PAAD	MissenseAndNonsense	Essential	-0.487947
ADSL	PAAD	Missense	Essential	-0.487947
ADSL	PBCA	MissenseAndNonsense_inHS.Permissive	Essential	1.12065
ADSL	PBCA	MissenseAndNonsense_inHS.Trevino	Essential	-1.60171e-16
ADSL	PBCA	MissenseAndNonsense_outHS.Permissive	Essential	3.12984e-11
ADSL	PBCA	MissenseAndNonsense	Essential	0.608407
ADSL	PBCA	Missense	Essential	0.657304
ADSL	PRAD	MissenseAndNonsense_inHS.Permissive	Essential	1.74144
ADSL	PRAD	MissenseAndNonsense_inHS.Trevino	Essential	-4.80514e-16
ADSL	PRAD	MissenseAndNonsense_outHS.Permissive	Essential	5.19519e-11
ADSL	PRAD	MissenseAndNonsense	Essential	0.74542
ADSL	PRAD	Missense	Essential	0.74542
ADSL	SKCA	MissenseAndNonsense_inHS.Permissive	Essential	1.182
ADSL	SKCA	MissenseAndNonsense_inHS.Trevino	Essential	0
ADSL	SKCA	MissenseAndNonsense_outHS.Permissive	Essential	9.61028e-16
ADSL	SKCA	MissenseAndNonsense	Essential	3.20343e-16
ADSL	SKCA	Missense	Essential	3.08682e-12
ADSL	SKCM	MissenseAndNonsense_inHS.Permissive	Essential	0.847075
ADSL	SKCM	MissenseAndNonsense_inHS.Trevino	Essential	2.88308e-15
ADSL	SKCM	MissenseAndNonsense_outHS.Permissive	Essential	-2.55527
ADSL	SKCM	MissenseAndNonsense	Essential	-0.789101
ADSL	SKCM	Missense	Essential	-0.751986
ADSL	SKCM	Nonsense	Essential	-7.26537e-13
ADSL	STAD	MissenseAndNonsense_inHS.Permissive	Essential	1.06368
ADSL	STAD	MissenseAndNonsense_inHS.Trevino	Essential	-3.20343e-16
ADSL	STAD	MissenseAndNonsense_outHS.Permissive	Essential	1.82691e-12
ADSL	STAD	MissenseAndNonsense	Essential	0.52122
ADSL	STAD	Missense	Essential	0.535097
ADSL	STAD_MSI	MissenseAndNonsense_inHS.Permissive	Essential	8.18155e-13
ADSL	STAD_MSI	MissenseAndNonsense_inHS.Trevino	Essential	3.20343e-16
ADSL	STAD_MSI	MissenseAndNonsense_outHS.Permissive	Essential	-0.846833
ADSL	STAD_MSI	MissenseAndNonsense	Essential	-0.652843
ADSL	STAD_MSI	Missense	Essential	-0.35792
ADSL	Small_intestine	MissenseAndNonsense_outHS.Permissive	Essential	0.853668
ADSL	Small_intestine	MissenseAndNonsense	Essential	0.823103
ADSL	Small_intestine	Missense	Essential	0.823103
ADSL	UCEC	MissenseAndNonsense_inHS.Permissive	Essential	4.43585
ADSL	UCEC	MissenseAndNonsense_inHS.Trevino	Essential	-3.20343e-16
ADSL	UCEC	MissenseAndNonsense_outHS.Permissive	Essential	-0.810029
ADSL	UCEC	MissenseAndNonsense	Essential	2.11469
ADSL	UCEC	Missense	Essential	2.19867
ADSL	UCEC_MSI	MissenseAndNonsense_inHS.Permissive	Essential	1.33653
ADSL	UCEC_MSI	MissenseAndNonsense_inHS.Trevino	Essential	3.20343e-16
ADSL	UCEC_MSI	MissenseAndNonsense_outHS.Permissive	Essential	-0.790719
ADSL	UCEC_MSI	MissenseAndNonsense	Essential	0.119145
ADSL	UCEC_MSI	Missense	Essential	0.12822
ADSL	UCEC_MSI	Nonsense	Essential	4.56905e-12
ADSL	UCEC_POLE	MissenseAndNonsense_inHS.Permissive	Essential	0.949622
ADSL	UCEC_POLE	MissenseAndNonsense_inHS.Trevino	Essential	0
ADSL	UCEC_POLE	MissenseAndNonsense_outHS.Permissive	Essential	-1.19702
ADSL	UCEC_POLE	MissenseAndNonsense	Essential	-0.451986
ADSL	UCEC_POLE	Missense	Essential	-0.243202
ADSL	UCEC_POLE	Nonsense	Essential	-0.809002
ADSS	BLCA	MissenseAndNonsense_inHS.Permissive	Essential	1.13268
ADSS	BRCA_Lum	MissenseAndNonsense_outHS.Permissive	Essential	-0.463511
ADSS	BRCA_Lum	Missense	Essential	-0.437619
ADSS	LUAD	Missense	Essential	0.548185
ADSS	SKCM	MissenseAndNonsense_inHS.Permissive	Essential	7.07018e-10
ADSS	SKCM	MissenseAndNonsense_outHS.Permissive	Essential	-0.962147
ADSS	SKCM	Missense	Essential	-0.741835
ADSS	UCEC_MSI	MissenseAndNonsense_inHS.Permissive	Essential	0.87446
ADSS	UCEC_MSI	MissenseAndNonsense_outHS.Permissive	Essential	-0.835464
ADSS	UCEC_MSI	Missense	Essential	-0.324643
ADSS	UCEC_POLE	MissenseAndNonsense_outHS.Permissive	Essential	0.432185
ADSS	UCEC_POLE	Missense	Essential	0.971871
AHCY	BLCA	MissenseAndNonsense_inHS.Permissive	Essential	-1.3211
AHCY	BLCA	MissenseAndNonsense_outHS.Permissive	Essential	-1.1656
AHCY	BLCA	MissenseAndNonsense	Essential	-1.50367
AHCY	BLCA	Missense	Essential	-1.22264
AHCY	BRCA	MissenseAndNonsense_inHS.Permissive	Essential	1.29133e-11
AHCY	BRCA	MissenseAndNonsense_outHS.Permissive	Essential	-0.820886
AHCY	BRCA	MissenseAndNonsense	Essential	-0.488452
AHCY	BRCA	Missense	Essential	-0.492513
AHCY	BRCA_HER2	MissenseAndNonsense_inHS.Permissive	Essential	-6.40685e-16
AHCY	BRCA_HER2	MissenseAndNonsense_outHS.Permissive	Essential	0
AHCY	BRCA_HER2	MissenseAndNonsense	Essential	-0.807833
AHCY	BRCA_Lum	MissenseAndNonsense_inHS.Permissive	Essential	1.05374
AHCY	BRCA_Lum	MissenseAndNonsense_outHS.Permissive	Essential	-0.482353
AHCY	BRCA_Lum	MissenseAndNonsense	Essential	-3.74034e-11
AHCY	BRCA_Lum	Missense	Essential	4.78273e-10
[truncated: 144,838 more rows]

## Sheet: Fig.2a
HGNC	Cohort	FullType	coef_corrected_log2_all	coef_corrected_log2_inHS
ACVR1	LUAD	OG noncognate cancer types	-0.295557	0
ACVR1	SKCM	OG noncognate cancer types	-1.49521	4.94708
ARHGAP5	COREAD-MSI	OG noncognate cancer types	0.10496	0
ARHGAP5	LUAD	OG noncognate cancer types	-2.17426	-4.80514e-16
BCL2L12	BRCA-HER2	OG noncognate cancer types	0	-8.00857e-16
BCL2L12	BRCA-Lum	OG noncognate cancer types	-0.809783	9.61028e-16
BCL2L12	BRCA-tri-	OG noncognate cancer types	0	-1.60171e-16
BCL2L12	CESC	OG noncognate cancer types	-3.20343e-16	3.20343e-16
BCL2L12	COREAD	OG noncognate cancer types	-0.795702	-9.61028e-16
BCL2L12	COREAD-MSI	OG noncognate cancer types	1.39605e-12	-8.00857e-16
BCL2L12	ESAD	OG cognate cancer types	3.20343e-16	0
BCL2L12	ESCA	OG noncognate cancer types	-4.80514e-16	-1.60171e-16
BCL2L12	GBM	OG noncognate cancer types	0	0
BCL2L12	HCC	OG noncognate cancer types	-6.40685e-16	0
BCL2L12	HNSC	OG noncognate cancer types	3.20343e-16	0
BCL2L12	LGG	OG noncognate cancer types	-0.769909	-6.40685e-16
BCL2L12	LIHC	OG noncognate cancer types	3.20343e-16	-1.60171e-16
BCL2L12	LUAD	OG noncognate cancer types	-0.81598	9.61028e-16
BCL2L12	LUSC	OG noncognate cancer types	-0.790261	-1.1212e-15
BCL2L12	NET	OG noncognate cancer types	3.20343e-16	-4.80514e-16
BCL2L12	NSCLC	OG noncognate cancer types	1.09993	3.20343e-16
BCL2L12	OV	OG noncognate cancer types	6.40685e-16	6.40685e-16
BCL2L12	PAAD	OG noncognate cancer types	3.20343e-16	-3.20343e-16
BCL2L12	PRAD	OG noncognate cancer types	-0.777559	3.20343e-16
BCL2L12	SARC-REST	OG noncognate cancer types	-1.60171e-16	-1.60171e-16
BCL2L12	SARC-UNDIFF	OG noncognate cancer types	0	0
BCL2L12	SCC	OG noncognate cancer types	0	0
BCL2L12	SCLC	OG noncognate cancer types	-3.20343e-16	0
BCL2L12	SKCM	OG cognate cancer types	2.09544	-9.61028e-16
BCL2L12	STAD	OG noncognate cancer types	0.707058	-1.60171e-16
BCL2L12	STAD-MSI	OG noncognate cancer types	-0.773344	-1.28137e-15
BCL2L12	UC	OG noncognate cancer types	-1.60171e-16	-1.60171e-16
BCL2L12	UCEC-MSI	OG noncognate cancer types	-0.27922	1.28137e-15
BCLAF1	BLCA	OG cognate cancer types	1.65039	-4.80514e-16
BCLAF1	BRCA-HER2	OG noncognate cancer types	0.4795	-1.60171e-16
BCLAF1	LUAD	OG cognate cancer types	1.55579	-8.00857e-16
BCLAF1	LUSC	OG cognate cancer types	2.63934	0
BCLAF1	PRAD	OG noncognate cancer types	0.502571	-6.40685e-16
BCLAF1	SKCM	OG cognate cancer types	1.62618	6.16052
BCLAF1	UCEC-POLE	OG cognate cancer types	1.86653	-9.61028e-16
BMP5	BLCA	OG noncognate cancer types	-0.250179	3.20343e-16
BMP5	BRCA	OG noncognate cancer types	-0.902344	0
BMP5	LUAD	OG noncognate cancer types	-0.99688	9.61028e-16
BMP5	MM	OG noncognate cancer types	0.081605	3.20343e-16
BMP5	OV	OG noncognate cancer types	0.499812	0
BMP5	PRAD	OG noncognate cancer types	-6.78966e-13	-4.80514e-16
BMP5	SKCM	OG noncognate cancer types	-0.178723	4.20023
BRAF	BLCA	OG cognate cancer types	1.65778	7.40358
BRAF	COREAD	OG cognate cancer types	4.78768	10.9662
BRAF	COREAD-MSI	OG cognate cancer types	3.56074	10.109
BRAF	GBM	OG cognate cancer types	0.407482	7.60797
BRAF	LUAD	OG cognate cancer types	4.73371	10.7434
BRAF	MM	OG cognate cancer types	4.21687	10.9213
BRAF	PRAD	OG cognate cancer types	2.74719	9.24503
BRAF	SKCM	OG cognate cancer types	6.42566	12.4307
C3orf70	SKCM	OG noncognate cancer types	-3.47621	0
CACNA1D	BCC	OG noncognate cancer types	-1.22392	0
CACNA1D	BRCA-tri-	OG noncognate cancer types	-0.0730265	0
CACNA1D	COREAD	OG noncognate cancer types	0.0634222	-6.40685e-16
CACNA1D	Kidney	OG noncognate cancer types	0.74391	-3.20343e-16
CACNA1D	MM	OG noncognate cancer types	-0.498743	0
CACNA1D	OV	OG noncognate cancer types	-2.47091	0
CACNA1D	PRAD	OG noncognate cancer types	0.11961	3.20343e-16
CACNA1D	SKCM	OG cognate cancer types	1.44635	3.20343e-16
CACNA1D	STAD	OG noncognate cancer types	-0.5213	3.20343e-16
CACNA1D	UCEC-POLE	OG cognate cancer types	1.11566	5.32454
CARD11	BLCA	OG noncognate cancer types	0.670164	-6.40685e-16
CARD11	BRCA-Lum	OG noncognate cancer types	-0.271253	-1.60171e-16
CARD11	BRCA-tri-	OG noncognate cancer types	0.13123	-1.60171e-16
CARD11	COREAD	OG noncognate cancer types	-0.0529485	0
CARD11	COREAD-MSI	OG noncognate cancer types	0.132079	-9.61028e-16
CARD11	ESAD	OG noncognate cancer types	-1.41169	0
CARD11	GBM	OG noncognate cancer types	0.189165	0
CARD11	HCC	OG noncognate cancer types	2.4077e-12	-1.60171e-16
CARD11	Kidney	OG noncognate cancer types	-0.200441	-1.60171e-16
CARD11	LGG	OG noncognate cancer types	0.18507	-1.60171e-16
CARD11	LIHC	OG noncognate cancer types	0.269653	-3.20343e-16
CARD11	LUSC	OG noncognate cancer types	0.126002	-3.20343e-16
CARD11	MALY	OG cognate cancer types	2.40921	0
CARD11	MM	OG noncognate cancer types	-0.385384	3.20343e-16
CARD11	NSCLC	OG noncognate cancer types	1.90252e-12	-1.60171e-16
CARD11	OV	OG noncognate cancer types	0.48525	0
CARD11	PAAD	OG noncognate cancer types	0.416761	-1.60171e-16
CARD11	PRAD	OG noncognate cancer types	0.196819	-1.60171e-16
CARD11	SKCM	OG cognate cancer types	1.09756	6.40685e-16
CARD11	STAD	OG noncognate cancer types	0.495054	3.20343e-16
CARD11	STAD-MSI	OG noncognate cancer types	0.227176	-4.80514e-16
CARD11	UCEC	OG noncognate cancer types	3.38534e-10	-1.60171e-16
CCND1	COREAD	OG noncognate cancer types	-0.184365	0
CCND1	HNSC	OG noncognate cancer types	1.40003e-09	3.20343e-16
CCND1	LGG	OG noncognate cancer types	-0.261709	6.40685e-16
CCND1	LUAD	OG noncognate cancer types	-0.113684	-8.00857e-16
CCND1	LUSC	OG noncognate cancer types	0.1507	-4.80514e-16
CCND1	SKCM	OG noncognate cancer types	-1.37383	6.40685e-16
CCND1	STAD-MSI	OG noncognate cancer types	6.23803e-12	-4.80514e-16
CHD4	BLCA	OG cognate cancer types	0.772184	-3.20343e-16
CHD4	BRCA	OG cognate cancer types	0.76122	-3.20343e-16
CHD4	BRCA-Lum	OG cognate cancer types	2.04283	7.48763
CHD4	BRCA-tri-	OG noncognate cancer types	0.539026	-1.60171e-16
CHD4	COREAD-POLE	OG noncognate cancer types	1.05318	5.9006
CHD4	ESCA	OG noncognate cancer types	0.228034	-1.60171e-16
CHD4	HNSC	OG noncognate cancer types	-0.108809	-1.44154e-15
CHD4	LIHC	OG noncognate cancer types	-0.26606	3.20343e-16
CHD4	LUSC	OG noncognate cancer types	-0.281254	-4.80514e-16
CHD4	MM	OG noncognate cancer types	-0.37094	-1.60171e-16
CHD4	NSCLC	OG noncognate cancer types	0.204089	-3.20343e-16
CHD4	PAAD	OG noncognate cancer types	0.0658751	3.79699
CHD4	SARC	OG noncognate cancer types	0.662975	0
CHD4	SKCM	OG noncognate cancer types	-0.660301	0.836532
CHD4	UCEC	OG cognate cancer types	2.89077	7.63046
CHD4	UCEC-MSI	OG cognate cancer types	0.649754	5.06166
CTNNB1	BRCA-Lum	OG noncognate cancer types	-0.211511	6.40685e-16
CTNNB1	COREAD	OG cognate cancer types	1.87851	7.98607
CTNNB1	LUAD	OG cognate cancer types	1.77696	9.43314
CTNNB1	SKCM	OG cognate cancer types	0.936371	7.41988
CTNNB1	UCEC	OG cognate cancer types	3.67631	10.9753
CTNND2	BRCA-Lum	OG noncognate cancer types	-0.27874	1.28137e-15
CTNND2	CESC	OG noncognate cancer types	-1.19361	-1.60171e-16
CTNND2	COREAD	OG noncognate cancer types	-0.330689	-4.80514e-16
CTNND2	ESAD	OG noncognate cancer types	-1.03854	-1.60171e-16
CTNND2	ESAD-POLE	OG noncognate cancer types	-0.256425	0
CTNND2	LUAD	OG noncognate cancer types	0.230241	6.40685e-16
CTNND2	MM	OG noncognate cancer types	-0.195405	0
CTNND2	PAAD	OG noncognate cancer types	-0.452948	-1.60171e-16
CTNND2	STAD	OG noncognate cancer types	-0.120303	-1.60171e-16
CTNND2	UCEC	OG noncognate cancer types	-1.50766	3.20343e-16
DCC	HCC	OG noncognate cancer types	-0.988244	0
DCC	LUAD	OG noncognate cancer types	-0.576352	1.28137e-15
DCC	LUSC	OG noncognate cancer types	0.194279	9.61028e-16
DCC	SKCM	OG cognate cancer types	0.782275	3.85359
EGFR	LUAD	OG cognate cancer types	1.5401	8.47911
EGFR	SKCM	OG noncognate cancer types	0.474326	3.20343e-16
EGFR	STAD-MSI	OG noncognate cancer types	-0.255148	0
EIF1AX	BLCA	OG noncognate cancer types	0	3.20343e-16
EIF1AX	BRCA	OG noncognate cancer types	0.81227	0
EIF1AX	BRCA-Lum	OG noncognate cancer types	7.17664e-12	0
EIF1AX	COREAD-MSI	OG noncognate cancer types	0	-1.60171e-16
EIF1AX	COREAD-POLE	OG noncognate cancer types	-0.607283	0
EIF1AX	GBM	OG noncognate cancer types	0	3.20343e-16
EIF1AX	HNSC	OG noncognate cancer types	9.61028e-16	0
EIF1AX	LIHC	OG noncognate cancer types	0	0
EIF1AX	LUSC	OG noncognate cancer types	3.20343e-16	0
EIF1AX	NSCLC	OG noncognate cancer types	-1.1212e-15	0
EIF1AX	PRAD	OG cognate cancer types	1.79989	0
EIF1AX	SKCM	OG cognate cancer types	1.97576	3.20343e-16
EIF1AX	UCEC-POLE	OG noncognate cancer types	-0.89762	-1.60171e-15
EPHA7	COREAD	OG noncognate cancer types	0.154064	-1.60171e-16
EPHA7	HNSC	OG noncognate cancer types	-0.0275982	-1.60171e-16
EPHA7	LUAD	OG noncognate cancer types	0.00480319	-1.60171e-16
EPHA7	LUSC	OG noncognate cancer types	-0.648328	0
EPHA7	SKCM	OG noncognate cancer types	-0.283187	-0.866062
ERBB2	BLCA	OG cognate cancer types	2.78807	9.78625
ERBB2	BRCA	OG cognate cancer types	3.11253	10.6111
ERBB2	BRCA-Lum	OG cognate cancer types	2.68625	10.5721
ERBB2	CESC	OG cognate cancer types	0.907142	8.62519
ERBB2	COREAD	OG cognate cancer types	1.59698	9.00923
ERBB2	ESCA	OG cognate cancer types	0.319957	7.55201
ERBB2	Kidney	OG noncognate cancer types	-0.145107	6.8503
ERBB2	LUSC	OG noncognate cancer types	1.09698e-10	0.572244
ERBB2	MM	OG noncognate cancer types	5.2328e-12	-1.60171e-16
ERBB2	OV	OG noncognate cancer types	0.429854	0.381812
ERBB2	PRAD	OG noncognate cancer types	-6.33013e-12	4.18992
ERBB2	SCLC	OG noncognate cancer types	-0.330713	3.20343e-16
ERBB2	SKCM	OG noncognate cancer types	-0.107068	-3.20343e-16
ERBB2	STAD	OG cognate cancer types	2.42198	9.70326
ETV1	LUAD	OG noncognate cancer types	-0.856413	6.40685e-16
ETV1	LUSC	OG noncognate cancer types	-1.23588	0
ETV1	MM	OG noncognate cancer types	-1.08052	-1.60171e-16
ETV5	BLCA	OG noncognate cancer types	0.444175	0
ETV5	HNSC	OG noncognate cancer types	-0.31237	0
ETV5	Kidney	OG noncognate cancer types	0.446489	-3.20343e-16
ETV5	LUAD	OG noncognate cancer types	-0.667386	-3.20343e-16
ETV5	SKCM	OG noncognate cancer types	-0.101415	0
ETV5	STAD	OG noncognate cancer types	1.21676e-11	0
ETV5	UCEC-POLE	OG noncognate cancer types	-1.40516	-1.60171e-16
FGFR2	HNSC	OG noncognate cancer types	-0.556896	-3.20343e-16
FGFR2	LUAD	OG noncognate cancer types	1.20974e-11	0
FGFR2	LUSC	OG cognate cancer types	2.02705	-1.60171e-16
FGFR2	SKCM	OG cognate cancer types	1.60245	-4.80514e-16
FGFR3	BLCA	OG cognate cancer types	2.95785	12.6424
FGFR3	BRCA-HER2	OG noncognate cancer types	0	-1.60171e-16
FGFR3	BRCA-Lum	OG noncognate cancer types	0.149809	3.20343e-16
FGFR3	BRCA-tri-	OG noncognate cancer types	0.857446	-1.76188e-15
FGFR3	CESC	OG noncognate cancer types	-0.886914	-1.60171e-16
FGFR3	COREAD	OG noncognate cancer types	-6.10757e-11	0
FGFR3	COREAD-POLE	OG noncognate cancer types	-2.18552e-11	-9.61028e-16
FGFR3	HNSC	OG cognate cancer types	1.7297	10.802
FGFR3	LUAD	OG noncognate cancer types	-0.405759	-3.20343e-16
FGFR3	OV	OG noncognate cancer types	0	-1.60171e-16
FGFR3	PRAD	OG noncognate cancer types	4.64849e-12	3.20343e-16
FGFR3	SKCM	OG noncognate cancer types	0.702506	-3.20343e-16
FGFR3	STAD-MSI	OG noncognate cancer types	-0.490277	-4.80514e-16
FLT4	BLCA	OG noncognate cancer types	-0.124874	3.20343e-16
FLT4	BRCA-Lum	OG noncognate cancer types	-0.012057	-1.60171e-16
FLT4	HNSC	OG noncognate cancer types	0.203609	3.20343e-16
FLT4	Kidney	OG noncognate cancer types	-0.223732	0
FLT4	LUAD	OG noncognate cancer types	-0.501237	-3.20343e-16
FLT4	PRAD	OG noncognate cancer types	0.111169	3.20343e-16
FOXA1	BRCA-tri-	OG noncognate cancer types	0.66559	0
FOXA1	COREAD	OG noncognate cancer types	0.155856	0
FOXA1	COREAD-MSI	OG noncognate cancer types	-7.8058e-10	-1.60171e-16
FOXA1	GBM	OG noncognate cancer types	-0.695526	0
FOXA1	Kidney	OG noncognate cancer types	-3.46796	0
FOXA1	SKCM	OG noncognate cancer types	-1.5886	-3.20343e-16
FOXA1	STAD	OG noncognate cancer types	3.20343e-16	-1.60171e-16
FUBP1	BRCA-Lum	OG noncognate cancer types	0.173321	-1.60171e-16
FUBP1	COREAD	OG noncognate cancer types	1.42913	3.20343e-16
FUBP1	COREAD-MSI	OG noncognate cancer types	-0.312394	0
FUBP1	HNSC	OG noncognate cancer types	-0.23	3.20343e-16
FUBP1	LGG	OG cognate cancer types	-2.16135	-4.80514e-16
FUBP1	LIHC	OG noncognate cancer types	-0.868052	0
FUBP1	LUAD	OG noncognate cancer types	0.32708	6.40685e-16
FUBP1	LUSC	OG noncognate cancer types	0.653661	0
FUBP1	PRAD	OG noncognate cancer types	-0.57375	0
FUBP1	SKCM	OG noncognate cancer types	-0.387948	-1.28137e-15
GLI1	BLCA	OG noncognate cancer types	0.375006	3.20343e-16
GLI1	COREAD	OG noncognate cancer types	-0.262158	9.61028e-16
GLI1	COREAD-MSI	OG noncognate cancer types	-0.202342	0
GLI1	HNSC	OG noncognate cancer types	0.669385	-6.40685e-16
GLI1	SKCM	OG noncognate cancer types	-0.0944188	3.20343e-16
GLI1	UCEC-POLE	OG noncognate cancer types	-0.0730038	9.61028e-16
GNA11	BLCA	OG noncognate cancer types	0.118762	-1.60171e-16
GNA11	BRCA	OG noncognate cancer types	-3.20343e-16	3.20343e-16
GNA11	BRCA-Lum	OG noncognate cancer types	-0.498189	6.40685e-16
GNA11	HNSC	OG noncognate cancer types	0.476644	0
GNA11	LUAD	OG noncognate cancer types	-0.141916	3.20343e-16
GNA11	LUSC	OG noncognate cancer types	-0.384017	0
GNA11	MM	OG noncognate cancer types	0.627551	0
GNA11	NSCLC	OG noncognate cancer types	-0.806584	0
GNA11	PRAD	OG noncognate cancer types	-0.194179	3.20343e-16
GNA11	UCEC-MSI	OG noncognate cancer types	-1.13489	-6.40685e-16
GNAQ	BRCA-Lum	OG noncognate cancer types	0.149734	0
GNAQ	LUAD	OG noncognate cancer types	0.256088	-1.60171e-16
GNAQ	SKCM	OG noncognate cancer types	0.806227	8.72459
GRM3	BLCA	OG noncognate cancer types	-0.569451	3.20343e-16
GRM3	BRCA-Lum	OG noncognate cancer types	-0.392513	-3.20343e-16
GRM3	BRCA-tri-	OG noncognate cancer types	0.182089	0
GRM3	CESC	OG noncognate cancer types	0.122299	-1.44154e-15
GRM3	COREAD	OG noncognate cancer types	-0.292053	3.20343e-16
GRM3	ESCA	OG noncognate cancer types	-0.27243	0
GRM3	LIHC	OG noncognate cancer types	-0.561457	3.20343e-16
GRM3	LUAD	OG noncognate cancer types	-0.512059	6.40685e-16
GRM3	LUSC	OG noncognate cancer types	-0.564419	-1.44154e-15
GRM3	MM	OG noncognate cancer types	-0.80039	0
GRM3	NSCLC	OG noncognate cancer types	-0.268572	0
GRM3	SKCM	OG cognate cancer types	0.59749	1.28137e-15
GRM3	STAD	OG noncognate cancer types	0.423165	0
GRM3	STAD-MSI	OG noncognate cancer types	0.190306	-1.60171e-16
HRAS	BLCA	OG cognate cancer types	4.02343	9.52447
HRAS	BRCA-HER2	OG noncognate cancer types	3.20343e-16	0
HRAS	BTCA	OG noncognate cancer types	0	0
HRAS	GBM	OG noncognate cancer types	3.20343e-16	0
HRAS	HNSC	OG cognate cancer types	5.04026	11.0403
HRAS	Kidney	OG noncognate cancer types	-3.20343e-16	0
HRAS	LGG	OG noncognate cancer types	6.40685e-16	0
HRAS	LIHC	OG noncognate cancer types	0	0
HRAS	LUSC	OG cognate cancer types	3.31151	8.42375
HRAS	Lung	OG noncognate cancer types	0	0
HRAS	MM	OG noncognate cancer types	-3.20343e-16	-3.20343e-16
HRAS	NSCLC	OG noncognate cancer types	-6.40685e-16	0
HRAS	PAAD	OG noncognate cancer types	0.950807	0
HRAS	PRAD	OG cognate cancer types	2.93332	4.31009
HRAS	SKCM	OG cognate cancer types	1.8022	6.67114
HRAS	STAD	OG noncognate cancer types	1.13138	-1.60171e-16
HRAS	UC	OG cognate cancer types	0.975586	7.97769
HRAS	UCEC	OG noncognate cancer types	-6.40685e-16	-3.20343e-16
HRAS	UCEC-MSI	OG noncognate cancer types	-1.50577e-12	5.11725
IDH2	BLCA	OG noncognate cancer types	-0.315312	6.40685e-16
IDH2	BRCA-Lum	OG noncognate cancer types	-1.26843	-1.60171e-16
IDH2	BRCA-tri-	OG noncognate cancer types	-3.20343e-16	0
IDH2	CESC	OG noncognate cancer types	-0.810986	-1.60171e-16
IDH2	COREAD	OG noncognate cancer types	-0.857133	-1.60171e-16
IDH2	ESAD	OG noncognate cancer types	0	0
IDH2	ESCA	OG noncognate cancer types	-3.20343e-16	0
IDH2	HNSC	OG noncognate cancer types	8.84082e-12	7.76542
IDH2	Kidney	OG noncognate cancer types	2.79018e-13	-3.20343e-16
IDH2	LGG	OG cognate cancer types	3.44378	11.2728
IDH2	LUAD	OG noncognate cancer types	-1.28658	-1.60171e-16
IDH2	LUSC	OG noncognate cancer types	-0.862797	0
IDH2	NET	OG noncognate cancer types	0.693749	-1.60171e-16
IDH2	NSCLC	OG noncognate cancer types	3.20343e-16	0
IDH2	OV	OG noncognate cancer types	1.02864	0
IDH2	PRAD	OG noncognate cancer types	-0.844842	3.20343e-16
IDH2	SKCM	OG noncognate cancer types	-0.315628	9.61028e-16
IDH2	STAD	OG noncognate cancer types	0.809378	-1.60171e-16
IDH2	STAD-MSI	OG noncognate cancer types	-0.795648	3.20343e-16
IDH2	UCEC-MSI	OG cognate cancer types	0.980549	-2.72291e-15
KDR	BLCA	OG noncognate cancer types	-0.48891	0
KDR	BRCA-Lum	OG noncognate cancer types	-1.8569e-11	0
KDR	GIST	OG noncognate cancer types	-6.48809	6.40685e-16
KDR	LUAD	OG cognate cancer types	0.814626	-1.92206e-15
KDR	SKCM	OG cognate cancer types	1.38823	7.46769
KDR	TGCT	OG noncognate cancer types	-4.42493	-6.40685e-16
KIT	BCC	OG noncognate cancer types	-0.544218	0
KIT	BLCA	OG noncognate cancer types	0.367279	3.20343e-16
KIT	BRCA-Lum	OG noncognate cancer types	-0.344235	-1.60171e-16
KIT	COREAD	OG noncognate cancer types	-0.721314	1.60171e-15
KIT	HNSC	OG noncognate cancer types	5.83366e-11	0
KIT	LGG	OG noncognate cancer types	0.522274	3.20343e-16
KIT	LIHC	OG noncognate cancer types	0.273158	9.61028e-16
KIT	LUAD	OG noncognate cancer types	-1.19904	-6.40685e-16
KIT	LUSC	OG noncognate cancer types	-0.509977	3.20343e-16
KIT	NET	OG noncognate cancer types	0.120865	0
KIT	NSCLC	OG noncognate cancer types	0.27951	3.20343e-16
KIT	OV	OG noncognate cancer types	-0.376017	-3.20343e-16
KIT	PRAD	OG noncognate cancer types	-0.309411	0
KIT	SKCM	OG noncognate cancer types	-1.51243	4.59866
KRAS	LUAD	OG cognate cancer types	7.10938	11.9682
LCP1	COREAD	OG noncognate cancer types	0.63735	0
LCP1	MM	OG noncognate cancer types	-1.52141	0
MAP2K7	BLCA	OG noncognate cancer types	-3.68394e-14	3.20343e-16
MAP2K7	BRCA-HER2	OG noncognate cancer types	0.66473	-1.60171e-16
MAP2K7	BRCA-tri-	OG noncognate cancer types	0.799528	-1.60171e-16
MAP2K7	CESC	OG noncognate cancer types	-1.60171e-16	-1.60171e-16
MAP2K7	COREAD	OG cognate cancer types	1.97867	-1.92206e-15
MAP2K7	COREAD-MSI	OG cognate cancer types	2.27836	3.20343e-16
MAP2K7	GBM	OG noncognate cancer types	-0.301932	-1.60171e-16
MAP2K7	HNSC	OG noncognate cancer types	-0.492892	3.20343e-16
MAP2K7	LGG	OG noncognate cancer types	-0.369353	-9.61028e-16
MAP2K7	LIHC	OG noncognate cancer types	1.07606e-11	0
MAP2K7	LUAD	OG cognate cancer types	0.137005	-6.40685e-16
MAP2K7	LUSC	OG noncognate cancer types	0.805559	-8.00857e-16
MAP2K7	MM	OG noncognate cancer types	-0.625601	-3.20343e-16
MAP2K7	NET	OG noncognate cancer types	-6.40685e-16	3.20343e-16
MAP2K7	NSCLC	OG noncognate cancer types	-0.795219	3.20343e-16
MAP2K7	SKCM	OG noncognate cancer types	-1.11971	3.20343e-16
MAP2K7	STAD	OG cognate cancer types	3.28637	3.20343e-16
MAP2K7	STAD-MSI	OG cognate cancer types	2.39467	3.20343e-16
MAP2K7	UCEC-MSI	OG noncognate cancer types	0.279839	-1.60171e-16
MAPK1	COREAD	OG noncognate cancer types	0.852187	-1.60171e-16
MAPK1	HNSC	OG cognate cancer types	1.95604	10.3033
MAPK1	LUAD	OG noncognate cancer types	-0.144755	-1.60171e-16
MB21D2	SKCM	OG noncognate cancer types	-0.779407	2.28411
MTOR	COREAD	OG cognate cancer types	2.06359	9.81759
MTOR	HNSC	OG noncognate cancer types	-0.259033	6.58171
MTOR	LGG	OG noncognate cancer types	-0.529346	-3.20343e-16
MTOR	LUAD	OG noncognate cancer types	0.419349	0
MTOR	MM	OG noncognate cancer types	-0.761221	3.20343e-16
MTOR	PAAD	OG noncognate cancer types	-0.750205	0
MTOR	SKCM	OG noncognate cancer types	-0.616653	0.522561
MYC	BLCA	OG noncognate cancer types	-0.808782	0
MYC	BRCA-Lum	OG noncognate cancer types	-0.454574	0
MYC	CESC	OG noncognate cancer types	0.168408	0
MYC	COREAD	OG noncognate cancer types	0.265974	-1.60171e-16
MYC	COREAD-MSI	OG noncognate cancer types	-0.138238	0
MYC	ESAD	OG noncognate cancer types	-3.20343e-16	0
MYC	HNSC	OG noncognate cancer types	0.355877	0
MYC	LIHC	OG noncognate cancer types	-0.409588	3.20343e-16
MYC	LUAD	OG noncognate cancer types	-1.41606	-1.60171e-16
MYC	LUSC	OG noncognate cancer types	-0.877707	6.40685e-16
MYC	NSCLC	OG noncognate cancer types	-0.719908	0
MYC	PAAD	OG noncognate cancer types	-2.26477	-3.20343e-16
MYC	SKCM	OG noncognate cancer types	-2.34843	-2.2424e-15
MYC	STAD	OG noncognate cancer types	-0.3671	0
MYC	STAD-MSI	OG noncognate cancer types	-1.69774	0
MYC	UCEC	OG noncognate cancer types	-1.19538	0
MYC	UCEC-MSI	OG noncognate cancer types	-0.0504815	4.84684
MYC	UCEC-POLE	OG noncognate cancer types	-2.2496	-1.60171e-16
NFE2L2	BLCA	OG cognate cancer types	2.47062	8.34635
NFE2L2	BRCA-Lum	OG noncognate cancer types	0.611167	5.76779
NFE2L2	ESCA	OG cognate cancer types	1.8565	8.26434
NFE2L2	GBM	OG noncognate cancer types	-0.696419	0
NFE2L2	HNSC	OG cognate cancer types	2.74655	8.14679
NFE2L2	LUAD	OG cognate cancer types	1.24958	6.75382
NFE2L2	LUSC	OG cognate cancer types	5.35791	10.7601
NFE2L2	PRAD	OG noncognate cancer types	-0.412393	0
NFE2L2	SKCM	OG noncognate cancer types	-0.521186	3.20343e-16
NRAS	BLCA	OG cognate cancer types	1.91597	9.2252
NRAS	COREAD	OG cognate cancer types	4.42968	14.1982
NRAS	PRAD	OG cognate cancer types	2.34862	7.87902
NRAS	SKCM	OG cognate cancer types	5.98293	16.2343
PCBP1	BLCA	OG cognate cancer types	1.55217	6.40685e-16
PCBP1	BRCA-Lum	OG noncognate cancer types	-0.0993577	-6.40685e-16
PCBP1	BRCA-tri-	OG noncognate cancer types	0.899235	0
PCBP1	CESC	OG noncognate cancer types	0.869145	3.20343e-16
PCBP1	COREAD	OG cognate cancer types	4.15459	14.5858
PCBP1	ESAD	OG noncognate cancer types	-1.60171e-16	0
PCBP1	GBM	OG noncognate cancer types	0	-1.60171e-16
PCBP1	HNSC	OG noncognate cancer types	4.84595e-11	3.20343e-16
PCBP1	LUAD	OG noncognate cancer types	-0.300113	6.40685e-16
PCBP1	NET	OG noncognate cancer types	-1.60171e-16	3.20343e-16
PCBP1	PAAD	OG cognate cancer types	1.2065	3.20343e-16
PCBP1	SKCM	OG noncognate cancer types	-0.696998	0
PCBP1	UCEC	OG noncognate cancer types	-0.827275	0
PCCA	BLCA	OG noncognate cancer types	0.182101	-1.60171e-16
PCCA	COREAD-MSI	OG noncognate cancer types	-4.58197e-11	0.430117
PCCA	GBM	OG noncognate cancer types	0.390846	0
PCCA	LGG	OG noncognate cancer types	-0.532598	0
PCCA	LUAD	OG noncognate cancer types	-0.446582	3.20343e-16
PCCA	LUSC	OG noncognate cancer types	0.509857	-4.80514e-16
PCCA	NET	OG noncognate cancer types	0.328025	3.20343e-16
PCCA	NSCLC	OG noncognate cancer types	-1.50136	-6.40685e-16
PCCA	PRAD	OG noncognate cancer types	-0.534533	3.20343e-16
PCCA	SKCM	OG noncognate cancer types	-0.314713	9.61028e-16
PCCA	STAD	OG noncognate cancer types	-0.172918	10.2912
PCCA	STAD-MSI	OG cognate cancer types	1.59431	7.9672
PIK3CA	BLCA	OG cognate cancer types	3.79957	9.39309
PIK3CA	BRCA-Lum	OG cognate cancer types	6.48049	11.7193
PIK3CA	BRCA-tri-	OG cognate cancer types	2.39612	8.23017
PIK3CA	CESC	OG cognate cancer types	4.67204	10.2011
PIK3CA	COREAD	OG cognate cancer types	4.85539	10.1327
PIK3CA	ESAD	OG cognate cancer types	2.11053	7.78731
PIK3CA	HNSC	OG cognate cancer types	3.61582	9.78931
PIK3CA	LIHC	OG cognate cancer types	2.03753	7.46071
PIK3CA	LUAD	OG cognate cancer types	1.32658	7.10567
PIK3CA	LUSC	OG cognate cancer types	1.10404	6.31248
PIK3CA	MM	OG noncognate cancer types	-0.585819	-3.20343e-16
PIK3CA	PAAD	OG cognate cancer types	1.82759	7.59287
PIK3CA	PRAD	OG cognate cancer types	1.92986	7.36352
PIK3CA	STAD	OG cognate cancer types	4.23188	9.94777
PIK3CA	UCEC	OG cognate cancer types	5.04474	10.5511
PIK3CA	UCEC-MSI	OG cognate cancer types	2.72141	7.99293
PIK3CA	UCEC-POLE	OG cognate cancer types	1.54403	5.79355
PIK3CB	BLCA	OG noncognate cancer types	-0.631077	-3.20343e-16
PIK3CB	BRCA-Lum	OG noncognate cancer types	-0.119154	0
PIK3CB	ESCA	OG noncognate cancer types	-0.0160475	0
PIK3CB	LIHC	OG noncognate cancer types	1.91273e-11	0
PIK3CB	PRAD	OG noncognate cancer types	0.888221	3.20343e-16
PIK3CB	SKCM	OG noncognate cancer types	-0.599901	3.20343e-16
PIK3CB	UCEC-MSI	OG noncognate cancer types	0.12947	3.20343e-16
PIK3CB	UCEC-POLE	OG noncognate cancer types	-0.209195	3.20343e-16
PPM1D	BRCA-Lum	OG noncognate cancer types	0.328706	0
PPM1D	COREAD	OG noncognate cancer types	-0.420033	3.20343e-16
PPM1D	LUAD	OG noncognate cancer types	-0.302477	0
PPM1D	LUSC	OG noncognate cancer types	-0.508591	4.32728
PPM1D	PRAD	OG noncognate cancer types	-0.74258	3.20343e-16
PPM1D	SKCM	OG noncognate cancer types	-0.509396	0
PPM1D	STAD	OG noncognate cancer types	-0.606332	0
PPM1D	STAD-MSI	OG noncognate cancer types	-1.4735	-3.20343e-16
PREX2	BLCA	OG noncognate cancer types	-0.670801	-3.20343e-16
PREX2	COREAD-MSI	OG noncognate cancer types	-0.0120538	9.61028e-16
PREX2	HNSC	OG noncognate cancer types	-0.343003	-1.60171e-16
PREX2	LUSC	OG noncognate cancer types	-0.818762	-3.3636e-15
PREX2	PAAD	OG noncognate cancer types	-0.268754	3.20343e-16
PREX2	SKCM	OG noncognate cancer types	0.25635	4.67985
PREX2	UCEC-POLE	OG noncognate cancer types	-0.040144	0
PTPN11	BLCA	OG noncognate cancer types	-0.75938	3.20343e-16
PTPN11	BRCA	OG noncognate cancer types	3.20343e-16	-1.60171e-16
PTPN11	BRCA-Lum	OG noncognate cancer types	-0.221883	-6.40685e-16
PTPN11	BRCA-tri-	OG noncognate cancer types	3.20343e-16	0
PTPN11	CESC	OG noncognate cancer types	-0.797555	0
PTPN11	COREAD	OG cognate cancer types	2.3862	8.95562
PTPN11	COREAD-MSI	OG noncognate cancer types	0.25044	-1.28137e-15
PTPN11	HNSC	OG noncognate cancer types	-1.45787	0
PTPN11	Kidney	OG noncognate cancer types	0.945235	3.20343e-16
PTPN11	LUSC	OG noncognate cancer types	0.152423	6.06239
PTPN11	MM	OG cognate cancer types	2.78255	8.06929
PTPN11	NSCLC	OG cognate cancer types	1.62353	0
PTPN11	OV	OG noncognate cancer types	0.864766	-1.60171e-16
PTPN11	PAAD	OG noncognate cancer types	-1.60171e-16	0
PTPN11	PRAD	OG noncognate cancer types	0.250833	-4.80514e-16
PTPN11	SCLC	OG noncognate cancer types	0.8922	0
PTPN11	SKCM	OG noncognate cancer types	0.757956	5.78026
PTPN11	STAD	OG noncognate cancer types	0.402881	6.69126
PTPN11	STAD-MSI	OG noncognate cancer types	-0.287259	4.89579
PTPN11	UC	OG noncognate cancer types	-1.60171e-16	-1.60171e-16
PTPN11	UCEC	OG noncognate cancer types	0.109584	-1.60171e-16
RAC1	BLCA	OG noncognate cancer types	0	3.20343e-16
RAC1	BRCA	OG noncognate cancer types	-4.80514e-16	3.20343e-16
RAC1	BRCA-HER2	OG noncognate cancer types	3.20343e-16	-1.60171e-16
RAC1	BRCA-Lum	OG noncognate cancer types	6.40685e-16	3.20343e-16
RAC1	BRCA-tri-	OG noncognate cancer types	3.20343e-16	-1.60171e-16
RAC1	CESC	OG noncognate cancer types	1.46455	3.20343e-16
RAC1	COREAD	OG noncognate cancer types	9.61028e-16	0
RAC1	COREAD-MSI	OG noncognate cancer types	-0.815255	6.40685e-16
RAC1	ESAD-POLE	OG noncognate cancer types	-1.60171e-16	0
RAC1	ESCA	OG noncognate cancer types	1.16357	-1.60171e-16
RAC1	GBM	OG noncognate cancer types	-6.40685e-16	3.20343e-16
RAC1	HNSC	OG cognate cancer types	4.48275	7.90018
RAC1	Kidney	OG noncognate cancer types	6.40685e-16	-1.60171e-16
RAC1	LGG	OG noncognate cancer types	1.83242	0
RAC1	LUAD	OG noncognate cancer types	0	1.28137e-15
RAC1	LUSC	OG noncognate cancer types	-9.61028e-16	3.20343e-16
RAC1	MM	OG noncognate cancer types	0.90786	0
RAC1	NSCLC	OG noncognate cancer types	-2.08223e-15	0
RAC1	PAAD	OG noncognate cancer types	6.40685e-16	-4.80514e-16
RAC1	PRAD	OG noncognate cancer types	9.61028e-16	6.40685e-16
RAC1	SKCM	OG cognate cancer types	4.20661	9.73374
RAC1	STAD	OG noncognate cancer types	3.20343e-16	0
RAC1	STAD-MSI	OG noncognate cancer types	0	-4.80514e-16
RAC1	UCEC-POLE	OG noncognate cancer types	0.478408	-4.80514e-16
RAF1	CESC	OG noncognate cancer types	0	0
RAF1	HNSC	OG noncognate cancer types	0.110192	5.63331
RAF1	LIHC	OG noncognate cancer types	0	-1.60171e-16
RAF1	LUSC	OG noncognate cancer types	0.146401	10.0172
RAF1	MM	OG noncognate cancer types	0.310262	0
RAF1	NSCLC	OG noncognate cancer types	3.20343e-16	0
RAF1	SKCM	OG cognate cancer types	0.858934	8.72701
RGPD3	BLCA	OG noncognate cancer types	-1.57511	0
RGPD3	COREAD-MSI	OG noncognate cancer types	-1.41666	-1.60171e-16
RGPD3	SKCM	OG cognate cancer types	2.12771	0.535972
RHOA	BCC	OG noncognate cancer types	-1.60171e-16	3.20343e-16
RHOA	BLCA	OG cognate cancer types	3.26109	9.61028e-16
RHOA	BRCA	OG cognate cancer types	1.17671	0
RHOA	BRCA-Lum	OG cognate cancer types	3.13523	7.07619
RHOA	CESC	OG noncognate cancer types	3.20343e-16	-1.1212e-15
RHOA	COREAD	OG noncognate cancer types	0.833474	-1.1212e-15
RHOA	ESAD	OG noncognate cancer types	1.20739	-1.60171e-16
RHOA	GBM	OG noncognate cancer types	0.75224	-6.40685e-16
RHOA	HNSC	OG cognate cancer types	4.51924	9.3077
RHOA	Kidney	OG noncognate cancer types	-3.20343e-16	3.20343e-16
RHOA	LGG	OG noncognate cancer types	0.949881	0
RHOA	LIHC	OG noncognate cancer types	6.40685e-16	-1.60171e-16
RHOA	LMS	OG noncognate cancer types	-3.20343e-16	0
RHOA	MALY	OG cognate cancer types	6.28265	0
RHOA	MM	OG noncognate cancer types	1.07373	-8.00857e-16
RHOA	OV	OG noncognate cancer types	0	0
RHOA	SKCM	OG cognate cancer types	2.08087	-1.44154e-15
RHOA	STAD	OG cognate cancer types	6.24318	9.61554
RHOA	UCEC-MSI	OG cognate cancer types	1.88281	2.2424e-15
RRAS2	SKCM	OG noncognate cancer types	0.663471	0
SOX17	BLCA	OG noncognate cancer types	-1.63006	0
SOX17	BRCA-Lum	OG noncognate cancer types	0.21544	3.20343e-16
SOX17	COREAD	OG noncognate cancer types	-0.712656	9.61028e-16
SOX17	COREAD-MSI	OG noncognate cancer types	-0.34626	0
SOX17	COREAD-POLE	OG noncognate cancer types	-1.20555	3.20343e-16
SOX17	HNSC	OG noncognate cancer types	-2.48746	9.61028e-16
SOX17	LIHC	OG noncognate cancer types	-1.29705	3.20343e-16
SOX17	LMS	OG noncognate cancer types	-1.60171e-16	-1.60171e-16
SOX17	LUAD	OG noncognate cancer types	-0.273558	1.92206e-15
SOX17	LUSC	OG noncognate cancer types	-2.21294	3.20343e-16
SOX17	PAAD	OG noncognate cancer types	-0.497842	0
SOX17	PRAD	OG noncognate cancer types	-2.59528	-1.60171e-16
SOX17	SKCM	OG noncognate cancer types	-2.08375	2.2424e-15
SOX17	STAD	OG noncognate cancer types	-0.374669	-3.20343e-16
SOX17	STAD-MSI	OG noncognate cancer types	-0.342968	0
SOX17	UCEC	OG cognate cancer types	3.68585	13.5011
SOX17	UCEC-MSI	OG noncognate cancer types	-1.41663	-1.28137e-15
SOX17	UCEC-POLE	OG noncognate cancer types	-5.43738	1.28137e-15
STRIP2	BRCA-Lum	OG noncognate cancer types	-0.328369	0
STRIP2	COREAD	OG noncognate cancer types	-0.824615	3.20343e-16
STRIP2	LGG	OG noncognate cancer types	-0.617859	0
STRIP2	STAD	OG noncognate cancer types	-0.46174	0
STRIP2	UCEC-MSI	OG noncognate cancer types	-4.93456e-12	-3.20343e-16
TCF7L2	BLCA	OG noncognate cancer types	-1.15235	-3.20343e-16
TCF7L2	BRCA-tri-	OG noncognate cancer types	-1.6008	0
TCF7L2	CESC	OG noncognate cancer types	-3.91608e-11	0
TCF7L2	COREAD	OG cognate cancer types	3.18324	4.81489
TCF7L2	HNSC	OG noncognate cancer types	-1.49806	-1.60171e-16
TCF7L2	Kidney	OG noncognate cancer types	-0.553144	-1.60171e-16
TCF7L2	LUAD	OG noncognate cancer types	0.0722827	3.20343e-16
TCF7L2	LUSC	OG noncognate cancer types	-0.888793	0
TCF7L2	NSCLC	OG noncognate cancer types	7.6296e-12	0
TCF7L2	PRAD	OG noncognate cancer types	0.479499	0
TCF7L2	SKCM	OG noncognate cancer types	-0.817434	-1.92206e-15
TCF7L2	UCEC-MSI	OG noncognate cancer types	-0.156328	1.57809
TEC	BRCA-Lum	OG noncognate cancer types	0.0873167	-3.20343e-16
TEC	COREAD	OG noncognate cancer types	0.613078	-3.20343e-16
TEC	HNSC	OG noncognate cancer types	-0.532166	3.20343e-16
TEC	Kidney	OG noncognate cancer types	3.024e-11	0
TEC	SKCM	OG noncognate cancer types	0.0459428	4.50726
TRRAP	BLCA	OG noncognate cancer types	0.32152	6.74031
TRRAP	BRCA-Lum	OG noncognate cancer types	-0.376686	3.20343e-16
TRRAP	CESC	OG noncognate cancer types	-0.256034	3.20343e-16
TRRAP	COREAD	OG noncognate cancer types	0.40339	3.20343e-16
TRRAP	COREAD-MSI	OG noncognate cancer types	0.071384	3.20343e-16
TRRAP	COREAD-POLE	OG noncognate cancer types	-0.388943	6.40685e-16
TRRAP	GBM	OG noncognate cancer types	-0.339229	0
TRRAP	HNSC	OG noncognate cancer types	-0.451099	-4.80514e-16
TRRAP	LGG	OG noncognate cancer types	0.496331	-1.60171e-16
TRRAP	LIHC	OG noncognate cancer types	-0.840378	3.20343e-16
TRRAP	LUSC	OG noncognate cancer types	-0.646022	3.20343e-16
TRRAP	MM	OG noncognate cancer types	0.0477537	-1.60171e-16
TRRAP	PRAD	OG noncognate cancer types	0.363161	-1.60171e-16
TRRAP	SKCM	OG cognate cancer types	1.42308	9.12094
TRRAP	STAD-MSI	OG noncognate cancer types	0.292812	3.20343e-16
TRRAP	UCEC-MSI	OG noncognate cancer types	0.245377	7.32339
XPO1	BLCA	OG noncognate cancer types	-0.798814	-1.60171e-16
XPO1	BRCA	OG noncognate cancer types	0.738248	0
XPO1	COREAD	OG noncognate cancer types	-0.565102	0.482959
XPO1	COREAD-POLE	OG noncognate cancer types	0.356473	4.71789
XPO1	LUAD	OG noncognate cancer types	0.459476	6.40685e-16
XPO1	LUSC	OG noncognate cancer types	-0.661213	3.20343e-16
XPO1	SKCM	OG noncognate cancer types	-0.719767	-3.20343e-16
XPO1	STAD	OG noncognate cancer types	-0.227425	0
ZFHX4	BLCA	OG noncognate cancer types	-1.37906e-10	0
ZFHX4	COREAD	OG noncognate cancer types	0.473501	0
ZFHX4	COREAD-MSI	OG noncognate cancer types	0.143828	6.40685e-16
ZFHX4	ESCA	OG noncognate cancer types	-1.32936	0
ZFHX4	HNSC	OG noncognate cancer types	0.656318	4.29995
ZFHX4	LUAD	OG cognate cancer types	0.185099	3.20343e-16
ZFHX4	LUSC	OG cognate cancer types	0.575421	3.19507
ZFHX4	MALY	OG noncognate cancer types	-1.71632	0
ZFHX4	SKCM	OG noncognate cancer types	-0.829933	-0.139266
ZFHX4	STAD	OG noncognate cancer types	-0.582934	0.959455
ZFHX4	STAD-MSI	OG noncognate cancer types	0.13617	0.89305
ZFHX4	UCEC-MSI	OG noncognate cancer types	0.381155	3.83726
ZFHX4	UCEC-POLE	OG cognate cancer types	1.0466	3.51169

## Sheet: Fig.2b
HGNC	Cohort	FullType	coef_corrected_log2_all	coef_corrected_log2_outHS
ACVR1	LUAD	OG noncognate cancer types	-0.295557	-1.03063
ACVR1	SKCM	OG noncognate cancer types	-1.49521	-1.78582
ARHGAP5	COREAD-MSI	OG noncognate cancer types	0.10496	-0.877583
ARHGAP5	LUAD	OG noncognate cancer types	-2.17426	-2.74379
BCL2L12	BRCA-HER2	OG noncognate cancer types	0	3.20343e-16
BCL2L12	BRCA-Lum	OG noncognate cancer types	-0.809783	3.20343e-16
BCL2L12	BRCA-tri-	OG noncognate cancer types	0	3.20343e-16
BCL2L12	CESC	OG noncognate cancer types	-3.20343e-16	-1.60171e-16
BCL2L12	COREAD	OG noncognate cancer types	-0.795702	0
BCL2L12	COREAD-MSI	OG noncognate cancer types	1.39605e-12	0.507899
BCL2L12	ESAD	OG cognate cancer types	3.20343e-16	-1.60171e-16
BCL2L12	ESCA	OG noncognate cancer types	-4.80514e-16	3.20343e-16
BCL2L12	GBM	OG noncognate cancer types	0	9.61028e-16
BCL2L12	HCC	OG noncognate cancer types	-6.40685e-16	0
BCL2L12	HNSC	OG noncognate cancer types	3.20343e-16	9.61028e-16
BCL2L12	LGG	OG noncognate cancer types	-0.769909	-6.40685e-16
BCL2L12	LIHC	OG noncognate cancer types	3.20343e-16	-2.56274e-15
BCL2L12	LUAD	OG noncognate cancer types	-0.81598	1.28137e-15
BCL2L12	LUSC	OG noncognate cancer types	-0.790261	1.92206e-15
BCL2L12	NET	OG noncognate cancer types	3.20343e-16	-3.20343e-16
BCL2L12	NSCLC	OG noncognate cancer types	1.09993	1.48893
BCL2L12	OV	OG noncognate cancer types	6.40685e-16	-3.20343e-16
BCL2L12	PAAD	OG noncognate cancer types	3.20343e-16	-3.20343e-16
BCL2L12	PRAD	OG noncognate cancer types	-0.777559	-3.20343e-16
BCL2L12	SARC-REST	OG noncognate cancer types	-1.60171e-16	3.20343e-16
BCL2L12	SARC-UNDIFF	OG noncognate cancer types	0	0
BCL2L12	SCC	OG noncognate cancer types	0	3.20343e-16
BCL2L12	SCLC	OG noncognate cancer types	-3.20343e-16	0
BCL2L12	SKCM	OG cognate cancer types	2.09544	-1.21729
BCL2L12	STAD	OG noncognate cancer types	0.707058	-4.80514e-16
BCL2L12	STAD-MSI	OG noncognate cancer types	-0.773344	1.60171e-15
BCL2L12	UC	OG noncognate cancer types	-1.60171e-16	0
BCL2L12	UCEC-MSI	OG noncognate cancer types	-0.27922	-1.375
BCLAF1	BLCA	OG cognate cancer types	1.65039	0.61324
BCLAF1	BRCA-HER2	OG noncognate cancer types	0.4795	3.20343e-16
BCLAF1	LUAD	OG cognate cancer types	1.55579	-0.998909
BCLAF1	LUSC	OG cognate cancer types	2.63934	-0.806453
BCLAF1	PRAD	OG noncognate cancer types	0.502571	-1.44154e-15
BCLAF1	SKCM	OG cognate cancer types	1.62618	-0.443004
BCLAF1	UCEC-POLE	OG cognate cancer types	1.86653	-0.774188
BMP5	BLCA	OG noncognate cancer types	-0.250179	-0.639982
BMP5	BRCA	OG noncognate cancer types	-0.902344	-6.40685e-16
BMP5	LUAD	OG noncognate cancer types	-0.99688	-0.539738
BMP5	MM	OG noncognate cancer types	0.081605	-0.808012
BMP5	OV	OG noncognate cancer types	0.499812	3.20343e-16
BMP5	PRAD	OG noncognate cancer types	-6.78966e-13	-0.809211
BMP5	SKCM	OG noncognate cancer types	-0.178723	-1.55989
BRAF	BLCA	OG cognate cancer types	1.65778	0.183908
BRAF	COREAD	OG cognate cancer types	4.78768	0.366499
BRAF	COREAD-MSI	OG cognate cancer types	3.56074	-1.5556
BRAF	GBM	OG cognate cancer types	0.407482	-1.35553
BRAF	LUAD	OG cognate cancer types	4.73371	4.35314e-11
BRAF	MM	OG cognate cancer types	4.21687	-0.846267
BRAF	PRAD	OG cognate cancer types	2.74719	-3.20343e-16
BRAF	SKCM	OG cognate cancer types	6.42566	-4.80514e-16
C3orf70	SKCM	OG noncognate cancer types	-3.47621	-2.84581
CACNA1D	BCC	OG noncognate cancer types	-1.22392	-1.5014
CACNA1D	BRCA-tri-	OG noncognate cancer types	-0.0730265	1.92206e-15
CACNA1D	COREAD	OG noncognate cancer types	0.0634222	-0.337369
CACNA1D	Kidney	OG noncognate cancer types	0.74391	-0.646916
CACNA1D	MM	OG noncognate cancer types	-0.498743	-1.35406
CACNA1D	OV	OG noncognate cancer types	-2.47091	-1.52398
CACNA1D	PRAD	OG noncognate cancer types	0.11961	-9.87536e-12
CACNA1D	SKCM	OG cognate cancer types	1.44635	-0.0585084
CACNA1D	STAD	OG noncognate cancer types	-0.5213	-0.777877
CACNA1D	UCEC-POLE	OG cognate cancer types	1.11566	2.21293e-12
CARD11	BLCA	OG noncognate cancer types	0.670164	-0.854323
CARD11	BRCA-Lum	OG noncognate cancer types	-0.271253	-0.592026
CARD11	BRCA-tri-	OG noncognate cancer types	0.13123	-1.60171e-16
CARD11	COREAD	OG noncognate cancer types	-0.0529485	-1.82402
CARD11	COREAD-MSI	OG noncognate cancer types	0.132079	-1.10043
CARD11	ESAD	OG noncognate cancer types	-1.41169	-3.20343e-16
CARD11	GBM	OG noncognate cancer types	0.189165	-0.646991
CARD11	HCC	OG noncognate cancer types	2.4077e-12	0.664443
CARD11	Kidney	OG noncognate cancer types	-0.200441	-0.926898
CARD11	LGG	OG noncognate cancer types	0.18507	-0.81712
CARD11	LIHC	OG noncognate cancer types	0.269653	2.51652e-11
CARD11	LUSC	OG noncognate cancer types	0.126002	-2.31033
CARD11	MALY	OG cognate cancer types	2.40921	-4.80514e-16
CARD11	MM	OG noncognate cancer types	-0.385384	-1.65424
CARD11	NSCLC	OG noncognate cancer types	1.90252e-12	4.9716e-10
CARD11	OV	OG noncognate cancer types	0.48525	0.158495
CARD11	PAAD	OG noncognate cancer types	0.416761	-5.76894e-11
CARD11	PRAD	OG noncognate cancer types	0.196819	-0.277245
CARD11	SKCM	OG cognate cancer types	1.09756	-0.764392
CARD11	STAD	OG noncognate cancer types	0.495054	-3.20343e-16
CARD11	STAD-MSI	OG noncognate cancer types	0.227176	-1.14584
CARD11	UCEC	OG noncognate cancer types	3.38534e-10	-0.859576
CCND1	COREAD	OG noncognate cancer types	-0.184365	-1.60171e-16
CCND1	HNSC	OG noncognate cancer types	1.40003e-09	-0.680283
CCND1	LGG	OG noncognate cancer types	-0.261709	-1.4714
CCND1	LUAD	OG noncognate cancer types	-0.113684	-1.31863
CCND1	LUSC	OG noncognate cancer types	0.1507	1.48479e-12
CCND1	SKCM	OG noncognate cancer types	-1.37383	-2.61616
CCND1	STAD-MSI	OG noncognate cancer types	6.23803e-12	-0.868418
CHD4	BLCA	OG cognate cancer types	0.772184	-0.503393
CHD4	BRCA	OG cognate cancer types	0.76122	0.662834
CHD4	BRCA-Lum	OG cognate cancer types	2.04283	0.565829
CHD4	BRCA-tri-	OG noncognate cancer types	0.539026	0.821093
CHD4	COREAD-POLE	OG noncognate cancer types	1.05318	-0.52412
CHD4	ESCA	OG noncognate cancer types	0.228034	0
CHD4	HNSC	OG noncognate cancer types	-0.108809	-0.350854
CHD4	LIHC	OG noncognate cancer types	-0.26606	-0.864499
CHD4	LUSC	OG noncognate cancer types	-0.281254	-0.428276
CHD4	MM	OG noncognate cancer types	-0.37094	-3.82649e-13
CHD4	NSCLC	OG noncognate cancer types	0.204089	3.20343e-16
CHD4	PAAD	OG noncognate cancer types	0.0658751	-0.483783
CHD4	SARC	OG noncognate cancer types	0.662975	0
CHD4	SKCM	OG noncognate cancer types	-0.660301	-1.8056
CHD4	UCEC	OG cognate cancer types	2.89077	0.73573
CHD4	UCEC-MSI	OG cognate cancer types	0.649754	-1.08132
CTNNB1	BRCA-Lum	OG noncognate cancer types	-0.211511	-0.946749
CTNNB1	COREAD	OG cognate cancer types	1.87851	2.30471e-10
CTNNB1	LUAD	OG cognate cancer types	1.77696	-0.231283
CTNNB1	SKCM	OG cognate cancer types	0.936371	-1.43829
CTNNB1	UCEC	OG cognate cancer types	3.67631	-0.984823
CTNND2	BRCA-Lum	OG noncognate cancer types	-0.27874	-1.1212e-15
CTNND2	CESC	OG noncognate cancer types	-1.19361	-3.20343e-16
CTNND2	COREAD	OG noncognate cancer types	-0.330689	0
CTNND2	ESAD	OG noncognate cancer types	-1.03854	0
CTNND2	ESAD-POLE	OG noncognate cancer types	-0.256425	-1.60171e-16
CTNND2	LUAD	OG noncognate cancer types	0.230241	-6.40685e-16
CTNND2	MM	OG noncognate cancer types	-0.195405	0
CTNND2	PAAD	OG noncognate cancer types	-0.452948	1.28137e-15
CTNND2	STAD	OG noncognate cancer types	-0.120303	0
CTNND2	UCEC	OG noncognate cancer types	-1.50766	-4.80514e-16
DCC	HCC	OG noncognate cancer types	-0.988244	-1.54868
DCC	LUAD	OG noncognate cancer types	-0.576352	-3.15847
DCC	LUSC	OG noncognate cancer types	0.194279	-1.33554
DCC	SKCM	OG cognate cancer types	0.782275	-0.798548
EGFR	LUAD	OG cognate cancer types	1.5401	-1.46021
EGFR	SKCM	OG noncognate cancer types	0.474326	-0.74548
EGFR	STAD-MSI	OG noncognate cancer types	-0.255148	-0.554485
EIF1AX	BLCA	OG noncognate cancer types	0	6.40685e-16
EIF1AX	BRCA	OG noncognate cancer types	0.81227	0.846087
EIF1AX	BRCA-Lum	OG noncognate cancer types	7.17664e-12	0.077751
EIF1AX	COREAD-MSI	OG noncognate cancer types	0	3.20343e-16
EIF1AX	COREAD-POLE	OG noncognate cancer types	-0.607283	0
EIF1AX	GBM	OG noncognate cancer types	0	0
EIF1AX	HNSC	OG noncognate cancer types	9.61028e-16	2.2424e-15
EIF1AX	LIHC	OG noncognate cancer types	0	-3.20343e-16
EIF1AX	LUSC	OG noncognate cancer types	3.20343e-16	-3.20343e-16
EIF1AX	NSCLC	OG noncognate cancer types	-1.1212e-15	9.61028e-16
EIF1AX	PRAD	OG cognate cancer types	1.79989	0
EIF1AX	SKCM	OG cognate cancer types	1.97576	-0.834086
EIF1AX	UCEC-POLE	OG noncognate cancer types	-0.89762	-1.19242
EPHA7	COREAD	OG noncognate cancer types	0.154064	0.0139772
EPHA7	HNSC	OG noncognate cancer types	-0.0275982	-0.447865
EPHA7	LUAD	OG noncognate cancer types	0.00480319	-0.678719
EPHA7	LUSC	OG noncognate cancer types	-0.648328	-0.98036
EPHA7	SKCM	OG noncognate cancer types	-0.283187	-1.68284
ERBB2	BLCA	OG cognate cancer types	2.78807	1.13558
ERBB2	BRCA	OG cognate cancer types	3.11253	6.40685e-16
ERBB2	BRCA-Lum	OG cognate cancer types	2.68625	9.61028e-16
ERBB2	CESC	OG cognate cancer types	0.907142	-6.40685e-16
ERBB2	COREAD	OG cognate cancer types	1.59698	-1.92206e-15
ERBB2	ESCA	OG cognate cancer types	0.319957	3.20343e-16
ERBB2	Kidney	OG noncognate cancer types	-0.145107	-4.80514e-16
ERBB2	LUSC	OG noncognate cancer types	1.09698e-10	-2.88308e-15
ERBB2	MM	OG noncognate cancer types	5.2328e-12	-8.00857e-16
ERBB2	OV	OG noncognate cancer types	0.429854	-9.61028e-16
ERBB2	PRAD	OG noncognate cancer types	-6.33013e-12	-1.44154e-15
ERBB2	SCLC	OG noncognate cancer types	-0.330713	-4.80514e-16
ERBB2	SKCM	OG noncognate cancer types	-0.107068	1.28137e-15
ERBB2	STAD	OG cognate cancer types	2.42198	1.28137e-15
ETV1	LUAD	OG noncognate cancer types	-0.856413	-6.40685e-16
ETV1	LUSC	OG noncognate cancer types	-1.23588	3.20343e-16
ETV1	MM	OG noncognate cancer types	-1.08052	0
ETV5	BLCA	OG noncognate cancer types	0.444175	0.180371
ETV5	HNSC	OG noncognate cancer types	-0.31237	-1.33899
ETV5	Kidney	OG noncognate cancer types	0.446489	3.20343e-16
ETV5	LUAD	OG noncognate cancer types	-0.667386	-1.44924
ETV5	SKCM	OG noncognate cancer types	-0.101415	-0.239832
ETV5	STAD	OG noncognate cancer types	1.21676e-11	1.67667e-11
ETV5	UCEC-POLE	OG noncognate cancer types	-1.40516	-2.05635
FGFR2	HNSC	OG noncognate cancer types	-0.556896	-4.80514e-16
FGFR2	LUAD	OG noncognate cancer types	1.20974e-11	0
FGFR2	LUSC	OG cognate cancer types	2.02705	-1.60171e-16
FGFR2	SKCM	OG cognate cancer types	1.60245	-1.60171e-16
FGFR3	BLCA	OG cognate cancer types	2.95785	-1.26706
FGFR3	BRCA-HER2	OG noncognate cancer types	0	-1.60171e-16
FGFR3	BRCA-Lum	OG noncognate cancer types	0.149809	-0.288844
FGFR3	BRCA-tri-	OG noncognate cancer types	0.857446	0
FGFR3	CESC	OG noncognate cancer types	-0.886914	-0.80172
FGFR3	COREAD	OG noncognate cancer types	-6.10757e-11	-0.843868
FGFR3	COREAD-POLE	OG noncognate cancer types	-2.18552e-11	-9.3191e-11
FGFR3	HNSC	OG cognate cancer types	1.7297	3.0849e-13
FGFR3	LUAD	OG noncognate cancer types	-0.405759	-1.33087
FGFR3	OV	OG noncognate cancer types	0	-1.60171e-16
FGFR3	PRAD	OG noncognate cancer types	4.64849e-12	-1.60011e-13
FGFR3	SKCM	OG noncognate cancer types	0.702506	-1.28764
FGFR3	STAD-MSI	OG noncognate cancer types	-0.490277	-4.72552e-10
FLT4	BLCA	OG noncognate cancer types	-0.124874	-2.3623
FLT4	BRCA-Lum	OG noncognate cancer types	-0.012057	-0.927707
FLT4	HNSC	OG noncognate cancer types	0.203609	-2.40045
FLT4	Kidney	OG noncognate cancer types	-0.223732	-0.397581
FLT4	LUAD	OG noncognate cancer types	-0.501237	-1.28094
FLT4	PRAD	OG noncognate cancer types	0.111169	-3.02164
FOXA1	BRCA-tri-	OG noncognate cancer types	0.66559	-1.60171e-16
FOXA1	COREAD	OG noncognate cancer types	0.155856	-1.44353
FOXA1	COREAD-MSI	OG noncognate cancer types	-7.8058e-10	-0.912467
FOXA1	GBM	OG noncognate cancer types	-0.695526	-1.05306
FOXA1	Kidney	OG noncognate cancer types	-3.46796	-2.06863
FOXA1	SKCM	OG noncognate cancer types	-1.5886	-3.20963
FOXA1	STAD	OG noncognate cancer types	3.20343e-16	0
FUBP1	BRCA-Lum	OG noncognate cancer types	0.173321	0.649778
FUBP1	COREAD	OG noncognate cancer types	1.42913	-4.80514e-16
FUBP1	COREAD-MSI	OG noncognate cancer types	-0.312394	0
FUBP1	HNSC	OG noncognate cancer types	-0.23	-3.20343e-16
FUBP1	LGG	OG cognate cancer types	-2.16135	-9.61028e-16
FUBP1	LIHC	OG noncognate cancer types	-0.868052	-8.00857e-16
FUBP1	LUAD	OG noncognate cancer types	0.32708	0.164463
FUBP1	LUSC	OG noncognate cancer types	0.653661	0.867549
FUBP1	PRAD	OG noncognate cancer types	-0.57375	-6.40685e-16
FUBP1	SKCM	OG noncognate cancer types	-0.387948	-0.797636
GLI1	BLCA	OG noncognate cancer types	0.375006	6.40685e-16
GLI1	COREAD	OG noncognate cancer types	-0.262158	-0.542108
GLI1	COREAD-MSI	OG noncognate cancer types	-0.202342	-0.844192
GLI1	HNSC	OG noncognate cancer types	0.669385	0.156168
GLI1	SKCM	OG noncognate cancer types	-0.0944188	-1.49025
GLI1	UCEC-POLE	OG noncognate cancer types	-0.0730038	-0.359204
GNA11	BLCA	OG noncognate cancer types	0.118762	-1.31788
GNA11	BRCA	OG noncognate cancer types	-3.20343e-16	3.20343e-16
GNA11	BRCA-Lum	OG noncognate cancer types	-0.498189	-1.26545
GNA11	HNSC	OG noncognate cancer types	0.476644	4.61934e-12
GNA11	LUAD	OG noncognate cancer types	-0.141916	-0.85488
GNA11	LUSC	OG noncognate cancer types	-0.384017	-0.643351
GNA11	MM	OG noncognate cancer types	0.627551	-3.20343e-16
GNA11	NSCLC	OG noncognate cancer types	-0.806584	-0.80373
GNA11	PRAD	OG noncognate cancer types	-0.194179	-0.820117
GNA11	UCEC-MSI	OG noncognate cancer types	-1.13489	-1.50902
GNAQ	BRCA-Lum	OG noncognate cancer types	0.149734	0.149134
GNAQ	LUAD	OG noncognate cancer types	0.256088	-0.488068
GNAQ	SKCM	OG noncognate cancer types	0.806227	-1.64809
GRM3	BLCA	OG noncognate cancer types	-0.569451	-0.568682
GRM3	BRCA-Lum	OG noncognate cancer types	-0.392513	-0.132805
GRM3	BRCA-tri-	OG noncognate cancer types	0.182089	-3.20343e-16
GRM3	CESC	OG noncognate cancer types	0.122299	-9.61028e-16
GRM3	COREAD	OG noncognate cancer types	-0.292053	-1.10888
GRM3	ESCA	OG noncognate cancer types	-0.27243	9.61028e-16
GRM3	LIHC	OG noncognate cancer types	-0.561457	-0.511081
GRM3	LUAD	OG noncognate cancer types	-0.512059	-0.869652
GRM3	LUSC	OG noncognate cancer types	-0.564419	-0.534135
GRM3	MM	OG noncognate cancer types	-0.80039	-0.907751
GRM3	NSCLC	OG noncognate cancer types	-0.268572	-1.01759
GRM3	SKCM	OG cognate cancer types	0.59749	-1.1656
GRM3	STAD	OG noncognate cancer types	0.423165	-0.872991
GRM3	STAD-MSI	OG noncognate cancer types	0.190306	-0.269536
HRAS	BLCA	OG cognate cancer types	4.02343	0.833886
HRAS	BRCA-HER2	OG noncognate cancer types	3.20343e-16	0
HRAS	BTCA	OG noncognate cancer types	0	0
HRAS	GBM	OG noncognate cancer types	3.20343e-16	3.20343e-16
HRAS	HNSC	OG cognate cancer types	5.04026	-1.60171e-16
HRAS	Kidney	OG noncognate cancer types	-3.20343e-16	-1.60171e-15
HRAS	LGG	OG noncognate cancer types	6.40685e-16	0
HRAS	LIHC	OG noncognate cancer types	0	-8.00857e-16
HRAS	LUSC	OG cognate cancer types	3.31151	-1.60171e-16
HRAS	Lung	OG noncognate cancer types	0	0
HRAS	MM	OG noncognate cancer types	-3.20343e-16	6.40685e-16
HRAS	NSCLC	OG noncognate cancer types	-6.40685e-16	-3.20343e-16
HRAS	PAAD	OG noncognate cancer types	0.950807	0
HRAS	PRAD	OG cognate cancer types	2.93332	0
HRAS	SKCM	OG cognate cancer types	1.8022	-5.82047e-12
HRAS	STAD	OG noncognate cancer types	1.13138	1.27464
HRAS	UC	OG cognate cancer types	0.975586	3.20343e-16
HRAS	UCEC	OG noncognate cancer types	-6.40685e-16	3.20343e-16
HRAS	UCEC-MSI	OG noncognate cancer types	-1.50577e-12	-0.822131
IDH2	BLCA	OG noncognate cancer types	-0.315312	0.191402
IDH2	BRCA-Lum	OG noncognate cancer types	-1.26843	-0.792223
IDH2	BRCA-tri-	OG noncognate cancer types	-3.20343e-16	0
IDH2	CESC	OG noncognate cancer types	-0.810986	0
IDH2	COREAD	OG noncognate cancer types	-0.857133	-3.20343e-16
IDH2	ESAD	OG noncognate cancer types	0	3.20343e-16
IDH2	ESCA	OG noncognate cancer types	-3.20343e-16	0
IDH2	HNSC	OG noncognate cancer types	8.84082e-12	-6.40685e-16
IDH2	Kidney	OG noncognate cancer types	2.79018e-13	0.824285
IDH2	LGG	OG cognate cancer types	3.44378	0.53703
IDH2	LUAD	OG noncognate cancer types	-1.28658	-0.717204
IDH2	LUSC	OG noncognate cancer types	-0.862797	-2.08223e-15
IDH2	NET	OG noncognate cancer types	0.693749	-9.61028e-16
IDH2	NSCLC	OG noncognate cancer types	3.20343e-16	6.40685e-16
IDH2	OV	OG noncognate cancer types	1.02864	-4.80514e-16
IDH2	PRAD	OG noncognate cancer types	-0.844842	-0.715446
IDH2	SKCM	OG noncognate cancer types	-0.315628	-0.495983
IDH2	STAD	OG noncognate cancer types	0.809378	0.936486
IDH2	STAD-MSI	OG noncognate cancer types	-0.795648	-6.40685e-16
IDH2	UCEC-MSI	OG cognate cancer types	0.980549	0.290143
KDR	BLCA	OG noncognate cancer types	-0.48891	-2.45437
KDR	BRCA-Lum	OG noncognate cancer types	-1.8569e-11	-1.76235
KDR	GIST	OG noncognate cancer types	-6.48809	-5.49472
KDR	LUAD	OG cognate cancer types	0.814626	-0.533255
KDR	SKCM	OG cognate cancer types	1.38823	-0.798342
KDR	TGCT	OG noncognate cancer types	-4.42493	-3.27001
KIT	BCC	OG noncognate cancer types	-0.544218	-0.836616
KIT	BLCA	OG noncognate cancer types	0.367279	-0.862344
KIT	BRCA-Lum	OG noncognate cancer types	-0.344235	-0.116418
KIT	COREAD	OG noncognate cancer types	-0.721314	-2.09861
KIT	HNSC	OG noncognate cancer types	5.83366e-11	-0.923308
KIT	LGG	OG noncognate cancer types	0.522274	8.74151e-12
KIT	LIHC	OG noncognate cancer types	0.273158	-1.57879
KIT	LUAD	OG noncognate cancer types	-1.19904	-1.96763
KIT	LUSC	OG noncognate cancer types	-0.509977	-1.27087
KIT	NET	OG noncognate cancer types	0.120865	-4.80514e-16
KIT	NSCLC	OG noncognate cancer types	0.27951	0.606903
KIT	OV	OG noncognate cancer types	-0.376017	-0.665634
KIT	PRAD	OG noncognate cancer types	-0.309411	-2.07788
KIT	SKCM	OG noncognate cancer types	-1.51243	-2.38425
KRAS	LUAD	OG cognate cancer types	7.10938	-4.80514e-16
LCP1	COREAD	OG noncognate cancer types	0.63735	3.20343e-16
LCP1	MM	OG noncognate cancer types	-1.52141	-0.993331
MAP2K7	BLCA	OG noncognate cancer types	-3.68394e-14	0.795835
MAP2K7	BRCA-HER2	OG noncognate cancer types	0.66473	3.20343e-16
MAP2K7	BRCA-tri-	OG noncognate cancer types	0.799528	-1.60171e-16
MAP2K7	CESC	OG noncognate cancer types	-1.60171e-16	-1.60171e-16
MAP2K7	COREAD	OG cognate cancer types	1.97867	-0.790394
MAP2K7	COREAD-MSI	OG cognate cancer types	2.27836	-0.468465
MAP2K7	GBM	OG noncognate cancer types	-0.301932	-0.614324
MAP2K7	HNSC	OG noncognate cancer types	-0.492892	-0.835997
MAP2K7	LGG	OG noncognate cancer types	-0.369353	-0.785482
MAP2K7	LIHC	OG noncognate cancer types	1.07606e-11	0
MAP2K7	LUAD	OG cognate cancer types	0.137005	-0.862421
MAP2K7	LUSC	OG noncognate cancer types	0.805559	0.507688
MAP2K7	MM	OG noncognate cancer types	-0.625601	3.20343e-16
MAP2K7	NET	OG noncognate cancer types	-6.40685e-16	6.40685e-16
MAP2K7	NSCLC	OG noncognate cancer types	-0.795219	0
MAP2K7	SKCM	OG noncognate cancer types	-1.11971	-2.81391
MAP2K7	STAD	OG cognate cancer types	3.28637	0.801828
MAP2K7	STAD-MSI	OG cognate cancer types	2.39467	-0.789519
MAP2K7	UCEC-MSI	OG noncognate cancer types	0.279839	-0.628375
MAPK1	COREAD	OG noncognate cancer types	0.852187	-6.40685e-16
MAPK1	HNSC	OG cognate cancer types	1.95604	-1.60171e-16
MAPK1	LUAD	OG noncognate cancer types	-0.144755	-0.57501
MB21D2	SKCM	OG noncognate cancer types	-0.779407	-1.13011
MTOR	COREAD	OG cognate cancer types	2.06359	0.418197
MTOR	HNSC	OG noncognate cancer types	-0.259033	-0.313133
MTOR	LGG	OG noncognate cancer types	-0.529346	-0.397159
MTOR	LUAD	OG noncognate cancer types	0.419349	-1.44073
MTOR	MM	OG noncognate cancer types	-0.761221	0
MTOR	PAAD	OG noncognate cancer types	-0.750205	-1.60171e-16
MTOR	SKCM	OG noncognate cancer types	-0.616653	-2.01066
MYC	BLCA	OG noncognate cancer types	-0.808782	-1.38907
MYC	BRCA-Lum	OG noncognate cancer types	-0.454574	-1.33257
MYC	CESC	OG noncognate cancer types	0.168408	0
MYC	COREAD	OG noncognate cancer types	0.265974	-0.760979
MYC	COREAD-MSI	OG noncognate cancer types	-0.138238	-2.10357
MYC	ESAD	OG noncognate cancer types	-3.20343e-16	3.20343e-16
MYC	HNSC	OG noncognate cancer types	0.355877	-0.365082
MYC	LIHC	OG noncognate cancer types	-0.409588	-3.20343e-16
MYC	LUAD	OG noncognate cancer types	-1.41606	-2.41451
MYC	LUSC	OG noncognate cancer types	-0.877707	-1.75478
MYC	NSCLC	OG noncognate cancer types	-0.719908	-6.40685e-16
MYC	PAAD	OG noncognate cancer types	-2.26477	-1.38993
MYC	SKCM	OG noncognate cancer types	-2.34843	-3.90636
MYC	STAD	OG noncognate cancer types	-0.3671	-0.38984
MYC	STAD-MSI	OG noncognate cancer types	-1.69774	-1.85662
MYC	UCEC	OG noncognate cancer types	-1.19538	-1.50594
MYC	UCEC-MSI	OG noncognate cancer types	-0.0504815	-0.987392
MYC	UCEC-POLE	OG noncognate cancer types	-2.2496	-2.64118
NFE2L2	BLCA	OG cognate cancer types	2.47062	-0.295203
NFE2L2	BRCA-Lum	OG noncognate cancer types	0.611167	-0.776561
NFE2L2	ESCA	OG cognate cancer types	1.8565	-0.18439
NFE2L2	GBM	OG noncognate cancer types	-0.696419	-8.00857e-16
NFE2L2	HNSC	OG cognate cancer types	2.74655	-0.247824
NFE2L2	LUAD	OG cognate cancer types	1.24958	-0.393634
NFE2L2	LUSC	OG cognate cancer types	5.35791	0.439971
NFE2L2	PRAD	OG noncognate cancer types	-0.412393	-1.22001
NFE2L2	SKCM	OG noncognate cancer types	-0.521186	-1.02955
NRAS	BLCA	OG cognate cancer types	1.91597	1.40921
NRAS	COREAD	OG cognate cancer types	4.42968	0
NRAS	PRAD	OG cognate cancer types	2.34862	6.40685e-16
NRAS	SKCM	OG cognate cancer types	5.98293	-0.802093
PCBP1	BLCA	OG cognate cancer types	1.55217	1.92307
PCBP1	BRCA-Lum	OG noncognate cancer types	-0.0993577	-1.06743
PCBP1	BRCA-tri-	OG noncognate cancer types	0.899235	-1.60171e-16
PCBP1	CESC	OG noncognate cancer types	0.869145	0.914509
PCBP1	COREAD	OG cognate cancer types	4.15459	-2.81016e-11
PCBP1	ESAD	OG noncognate cancer types	-1.60171e-16	3.20343e-16
PCBP1	GBM	OG noncognate cancer types	0	-3.20343e-16
PCBP1	HNSC	OG noncognate cancer types	4.84595e-11	-0.800644
PCBP1	LUAD	OG noncognate cancer types	-0.300113	-0.838634
PCBP1	NET	OG noncognate cancer types	-1.60171e-16	0
PCBP1	PAAD	OG cognate cancer types	1.2065	1.19692
PCBP1	SKCM	OG noncognate cancer types	-0.696998	-0.404809
PCBP1	UCEC	OG noncognate cancer types	-0.827275	6.40685e-16
PCCA	BLCA	OG noncognate cancer types	0.182101	3.20343e-16
PCCA	COREAD-MSI	OG noncognate cancer types	-4.58197e-11	-0.801857
PCCA	GBM	OG noncognate cancer types	0.390846	0.834194
PCCA	LGG	OG noncognate cancer types	-0.532598	-0.804636
PCCA	LUAD	OG noncognate cancer types	-0.446582	-0.352959
PCCA	LUSC	OG noncognate cancer types	0.509857	-0.824701
PCCA	NET	OG noncognate cancer types	0.328025	-3.20343e-16
PCCA	NSCLC	OG noncognate cancer types	-1.50136	-1.60171e-15
PCCA	PRAD	OG noncognate cancer types	-0.534533	1.28137e-15
PCCA	SKCM	OG noncognate cancer types	-0.314713	-0.570475
PCCA	STAD	OG noncognate cancer types	-0.172918	-4.80514e-16
PCCA	STAD-MSI	OG cognate cancer types	1.59431	-6.40685e-16
PIK3CA	BLCA	OG cognate cancer types	3.79957	0.252296
PIK3CA	BRCA-Lum	OG cognate cancer types	6.48049	-5.87188e-13
PIK3CA	BRCA-tri-	OG cognate cancer types	2.39612	0.21613
[truncated: 189 more rows]

## Sheet: Fig.2c
HGNC	Cohort	FullType	Cognate_MutPan_CGC	coef_corrected_log2	FDR
[truncated: 67 more rows]

[truncated: 20 more sheets: Fig.2d, Fig.2e, Fig.2f, Fig.3a, Fig.3b, Fig.3c, Fig.3d, Fig.4a, Fig.4b, Fig.4c, Fig.4d, Fig.5a, Fig.5b, Fig.5c, Fig.6a, Fig.6b_GroupEnrichment, Fig.6b_Heatmap, Fig.6c, Fig.6d, SampleSizes]
